# Supplementary material for: Second-Generation Genetic Linkage Map of Catfish and Its Integration with the BAC-Based Physical Map
Source: Oxford University Press journal article supplement (doi:10.1534/g3.112.003962), 2012-10-01
Supplement: 1233_figures1.pdf [file 1233_figures1.pdf]

1

2

3

4

0.0 AUBES2582  
 3.0 AUBES2148 AUBES1157  
 4.7 AUBES4076  
 5.8 AUBES2400  
 8.8 AUBES1995  
 9.9 AUBES5192  
 14.7 AUBES4012  
 16.8 AUBES4851  
 18.9 IpCG0128\_U9  
 21.8 AUBES3298  
 22.6 AUBES1924  
 22.8 AUBES4943  
 23.0 AUBES3946  
 23.2 AUBES4697  
 23.5 AUBES3566  
 23.8 AUBES3598  
 24.3 AUBES2756  
 24.5 AUBES2772  
 24.7 AUBES5202 AUBES3178  
 24.8 AUBES4022  
 25.0 AUBES3350  
 25.1 AUBES2927 AUBES2764  
 25.2 AUBES4720  
 25.4 AUBES3568 AUBES3160  
 AUBES4540  
 25.5 AUBES2634 AUBES4992  
 AUBES5191 AUBES4729  
 AUBES4437 AUBES4099  
 AUBES3451 AUBES4436  
 AUBES4263 AUEST0345L  
 AUBES3475 AUBES4139  
 AUBES4800 AUBES4860  
 AUBES4764 AUSNP000013  
 AUBES2839 AUBES4861  
 AUBES5165 AUBES1691  
 AUBES3565 AUBES2627  
 AUBES5120 AUBES4650  
 AUBES3923 AUBES3452  
 AUBES2049  
 25.8 AUBES2954 AUBES2358  
 AUBES3567 AUBES4624  
 AUBES3209  
 26.2 AUBES2446 AUBES4641  
 26.3 AUBES2953  
 26.5 AUBES2067  
 26.7 AUBES1527  
 26.8 AUBES1803  
 27.1 AUBES4541  
 27.2 AUBES5061  
 27.5 AUBES5198  
 28.1 AUBES4468  
 28.6 AUBES3108  
 29.2 AUBES5183  
 30.1 AUBES2110  
 32.4 AUBES0793  
 33.6 AUBES5119  
 34.4 AUEST0936  
 37.8 AUBES3993  
 38.8 AUBES5317  
 39.3 AUBES3421  
 39.4 AUBES3420  
 39.8 AUBES3992  
 40.0 AUBES3745  
 40.1 AUBES3752 AUBES4483  
 40.8 AUEST0572  
 41.9 AUBES3688 AUSNP000052  
 AUSNP000077 AUSNP000038  
 42.0 AUBES2695  
 42.1 AUBES1792  
 44.4 AUEST0803  
 44.5 AUBES4321 AUEST0002  
 44.8 AUBES4724  
 46.1 AUNGS5096  
 47.8 AUBES2082  
 48.3 AUBES5344 AUBES3403  
 AUBES3404  
 48.4 AUBES1378  
 49.5 AUBES1597  
 50.2 AUBES5327  
 51.0 AUBES4310  
 51.9 AUBES4758  
 55.3 AUEST0900  
 68.2 AUBES4414  
 68.5 AUEST0220U AUEST0220L  
 69.0 AUEST0755  
 69.1 AUBES1075  
 76.6 AUEST0132

0.0 AUBES1263  
 0.5 AUBES1868  
 1.9 AUBES4268  
 3.8 AUBES4170  
 4.7 AUBES1947  
 6.0 AUBES3080  
 6.7 AUBES5080  
 11.0 AUBES4698  
 13.2 AUBES2884  
 13.6 AUBES2885  
 16.7 AUBES4165  
 19.4 AUBES1881  
 20.6 AUBES3952  
 25.2 AUEST0610  
 26.4 AUBES3395  
 26.5 AUBES2258  
 33.1 AUBES3626  
 34.3 AUBES3394  
 34.7 IpCG0007\_U24  
 35.4 AUBES1586  
 35.6 AUBES5410  
 36.5 AUEST0771  
 37.0 AUBES3625  
 38.0 IpCG0134\_U24  
 38.6 AUEST0714  
 39.0 AUBES4162  
 39.6 AUBES4789  
 39.7 AUBES4487  
 40.1 AUBES5146  
 40.4 AUBES1592  
 40.6 AUBES3627  
 40.9 AUBES5044  
 41.3 AUBES5300  
 41.8 AUBES3633  
 AUBES3628 IpCG0130\_U24  
 AUBES4163 AUBES4434  
 AUBES2279 AUSNP000078  
 AUEST0514  
 42.0 AUBES4435 AUBES5387  
 42.2 AUBES3758  
 42.3 IpCG0182\_U24 AUBES3082  
 42.4 AUBES3858 AUBES3036  
 42.5 AUBES3238  
 42.7 AUBES5001  
 42.9 AUBES1701  
 43.3 AUBES2676  
 44.2 IpCG0297\_U24  
 45.1 AUBES3988 AUBES3978  
 45.4 AUBES4111  
 46.2 AUBES1842  
 46.5 AUBES2085 AUBES1853  
 46.7 AUBES1615  
 46.9 AUBES5241  
 47.5 AUBES5412  
 47.6 AUBES4269  
 49.1 AUEST0670  
 50.8 AUEST0836  
 51.3 AUBES4457  
 51.7 IpCG0293\_U24  
 52.5 AUBES2036  
 53.1 AUBES4456  
 55.4 AUBES3183  
 55.8 AUBES3184  
 56.4 AUBES4633  
 59.0 AUBES3215  
 63.9 AUBES5046  
 64.9 AUBES3995  
 65.6 AUEST0106  
 67.5 AUEST0998  
 70.2 AUBES4858 AUBES5408  
 71.1 AUBES4859  
 71.9 AUBES2551  
 72.5 AUBES5332  
 75.3 AUEST0472  
 79.9 AUBES2152

0.0 AUEST0981  
 0.1 IpCG0136\_U5  
 4.6 AUBES4824  
 6.5 AUBES1073  
 9.0 AUBES5154 AUBES5124  
 10.8 AUEST0815  
 25.2 AUEST0356B AUEST0356A  
 30.2 AUBES4476  
 30.9 AUBES4740  
 32.0 AUBES4718  
 33.4 AUBES4690  
 34.4 IpCG0124\_U5  
 37.1 AUBES5331  
 38.6 AUBES3895  
 42.2 AUBES4395  
 42.8 AUBES5169  
 44.9 AUEST0783  
 47.4 IpCG0233\_U5  
 48.3 AUBES1811  
 48.5 AUBES5048  
 49.4 AUBES5168  
 51.8 AUBES3536  
 54.0 AUBES1186  
 54.1 AUBES3065  
 54.3 AUEST0838  
 57.7 AUBES1590  
 58.4 AUBES3544  
 58.6 AUBES4343  
 59.4 AUBES3771  
 61.0 AUBES3074  
 61.7 AUBES2347  
 62.1 AUBES1846  
 62.4 AUBES2748  
 62.9 AUBES1742  
 63.0 AUBES1781  
 63.6 AUBES4784 AUBES4254  
 AUEST0829U AUBES4350  
 AUBES2595 AUSNP000072  
 AUEST0635U  
 64.6 AUBES5148 AUBES4950  
 64.8 AUBES2555 AUBES4702  
 65.0 AUBES4769  
 65.2 AUBES2052  
 65.4 AUBES2815  
 IpCG0290\_U5 AUBES3646  
 65.5 AUBES5229 IpCG0088\_U5  
 AUBES3879  
 AUBES4462 AUBES4271  
 AUBES1697 AUBES3327  
 AUBES4044  
 66.1 AUBES3139  
 66.2 AUBES3880 AUBES3647  
 66.5 AUBES3491  
 67.5 AUBES1626  
 68.0 AUBES2984  
 68.8 AUBES2097  
 71.2 AUBES5176  
 72.3 AUBES2550  
 72.8 AUBES4830  
 73.2 AUBES2926  
 73.3 AUBES2086 AUEST0753  
 73.9 AUBES5336  
 74.3 AUBES2423 AUBES4578  
 74.4 AUBES4593  
 74.5 AUBES5232 AUBES5259  
 AUBES4228  
 74.6 AUBES4876 AUBES5297  
 IgH\_U5  
 74.9 AUBES4970  
 75.2 AUBES4875  
 75.4 AUBES3913  
 75.9 AUBES4502  
 76.2 AUBES2113  
 76.9 AUBES2091  
 77.0 AUBES2095  
 AUBES1963  
 79.8 AUBES4974 AUBES2411  
 AUBES5067 AUNGS5105  
 79.9 AUBES1381  
 80.8 AUBES4976  
 81.4 AUBES2958  
 81.6 AUBES3443  
 81.7 AUBES2837  
 82.0 AUBES3444 AUBES2421  
 AUBES4704  
 83.1 AUBES4704  
 83.8 AUEST0406  
 85.0 AUBES2915  
 99.9 AUBES4620

0.0 AUBES1740  
 17.1 AUBES5273  
 18.1 AUBES2353  
 23.2 AUSNP000020 AUBES1795  
 26.4 AUBES4570  
 AUBES4936  
 28.6 AUBES1327  
 31.5 AUBES5203  
 35.4 AUBES5266  
 35.5 AUBES5234  
 37.1 AUBES4904  
 37.7 AUSNP000076  
 45.3 AUBES2399  
 50.0 IpCG0232\_U6  
 50.8 IpCG0230\_U6  
 52.3 IpCG0159\_U12  
 52.4 IpCG0158\_U6  
 AUBES5177  
 AUEST0678  
 AUBES4460  
 AUBES1153  
 55.0 IpCG0012\_U6  
 55.5 AUBES4496  
 55.7 AUBES4257  
 55.8 AUEST0288  
 56.0 AUBES4565  
 AUEST0305  
 56.4 AUBES3780  
 AUEST0505 AUBES3638  
 AUBES4354  
 57.0 AUBES4743 AUBES1413  
 57.3 AUEST0508  
 AUBES2792 AUBES5397  
 AUBES3639  
 AUBES4036  
 AUBES2427  
 AUBES1841 AUBES1810  
 AUBES4084  
 AUBES1230 AUBES4083  
 AUBES4276 IpCG0192\_U6  
 AUBES3012 AUBES4972  
 AUBES2459 AUBES2078  
 AUBES2403 AUBES2682  
 AUBES3576 AUBES2600  
 IpCG0309\_U6 AUBES5296  
 AUBES5193 AUBES1103  
 AUBES4939 AUBES4681  
 AUBES4070 AUBES4071  
 AUBES3306 AUBES1926  
 AUBES4480  
 58.1 AUBES1555 AUBES3694  
 AUBES3171 AUBES4869  
 AUBES1617  
 AUBES3468 AUBES2084  
 AUBES4906  
 AUBES4881  
 AUBES2829  
 AUBES3376  
 AUBES4543  
 AUBES1319  
 AUBES5388 AUBES5134  
 AUBES4971 AUBES4708  
 AUBES2505 AUBES4270  
 AUBES4709  
 AUBES3760  
 AUBES3312  
 AUEST0424  
 60.3 AUBES2617  
 60.8 AUBES5409  
 61.1 AUBES3608  
 61.5 AUBES3607  
 61.7 AUBES5377  
 61.8 AUBES2921  
 62.2 AUBES3154  
 63.0 AUBES5267  
 65.3 AUBES5380  
 66.4 AUEST0052  
 69.4 AUBES0364  
 74.0 IpCG0273\_U6  
 77.0 AUBES4498  
 86.1 AUBES2508  
 87.9 AUBES2508  
 88.3 AUEST0960

| 5    | 6                      | 7    | 8                      |      |                          |
|------|------------------------|------|------------------------|------|--------------------------|
| 0.0  | AUSNP000084            | 0.0  | AUBES1144              | 0.0  | AUBES4813                |
| 1.1  | AUEST0789              | 3.0  | AUBES5284              | 4.0  | AUBES3538                |
| 5.2  | AUEST0618              | 6.5  | AUEST0774 AUBES4993    | 6.1  | AUBES4368                |
| 9.1  | AUBES5362              | 8.2  | AUBES1616              | 6.2  | AUBES4367 AUBES3573      |
| 15.7 | AUBES3782              | 8.4  | AUBES4389              | 6.2  | AUBES3574                |
| 16.4 | AUBES4842              | 17.2 | AUBES3799              | 10.1 | AUBES3328                |
| 19.9 | AUBES5346              | 20.5 | AUEST0699L             | 10.5 | AUBES3357                |
| 22.3 | AUBES2883              | 22.0 | AUBES3798              | 10.6 | AUBES2576                |
| 24.3 | AUBES3002              | 25.1 | AUBES3804 AUBES3806    | 10.7 | AUBES3144                |
| 29.8 | AUBES4868              | 26.0 | AUBES3805              | 13.5 | AUBES4472                |
| 34.6 | AUBES4991              | 29.7 | AUBES2492              | 15.5 | AUBES5275                |
| 37.3 | AUBES3695              | 32.1 | AUBES2343              | 15.8 | AUBES1932                |
| 37.5 | AUBES4244              | 35.9 | AUBES1884              | 16.8 | AUBES4546                |
| 39.1 | AUBES2759              | 37.3 | AUEST0707              | 17.6 | AUBES3316                |
| 40.0 | IpCG0307_U11           | 37.8 | AUBES3004              | 17.6 | AUBES5328                |
| 40.6 | AUBES1952              | 38.1 | AUBES3793              | 20.6 | AUBES2722                |
| 41.1 | AUBES1422              | 38.4 | AUBES3777              | 25.1 | AUBES3380                |
| 41.5 | AUBES2457              | 38.7 | AUBES2689              | 28.9 | AUBES3203                |
| 41.9 | AUBES2559              | 39.0 | AUBES4144              | 30.6 | AUBES3203                |
| 42.7 | AUBES4357              | 39.1 | AUBES3934 AUBES4108    | 32.3 | AUBES3326                |
| 43.1 | AUBES4529              | 39.4 | AUBES5235              | 34.4 | AUBES1354                |
| 43.4 | AUBES5089              | 39.6 | AUBES4143              | 36.0 | AUEST0359                |
| 43.8 | AUEST0517              | 40.0 | AUBES3812              | 36.7 | AUBES4086                |
| 44.1 | AUBES4339 AUBES3629    | 40.2 | AUBES4003 AUBES3397    | 37.5 | AUBES1353                |
| 44.4 | AUBES2557              | 40.3 | AUBES2805 AUBES2642    | 38.0 | AUBES1990                |
| 44.5 | AUSNP000033 AUBES4024  | 40.3 | AUBES4637 AUBES3690    | 38.4 | AUBES5277                |
| 44.5 | AUBES4574 AUBES4374    | 40.4 | AUBES3791 AUBES3774    | 38.5 | AUBES5036                |
| 44.5 | AUBES3630 AUBES3596    | 40.6 | AUBES3809              | 38.9 | AUBES4126                |
| 44.7 | AUBES4346 AUSNP000027  | 40.6 | AUBES2034 AUBES3701    | 39.2 | AUEST0779 AUBES4610      |
| 44.7 | AUBES2993              | 40.8 | AUEST0414 AUBES4802    | 39.6 | IpCG0189_U18             |
| 44.8 | AUBES4052              | 40.8 | AUBES3359 AUBES3423    | 41.0 | AUBES2532                |
| 44.9 | AUBES4528              | 40.8 | AUBES3514 AUBES3017    | 41.4 | AUBES5306                |
| 45.3 | AUBES4425              | 40.8 | AUBES5370 AUBES3794    | 41.9 | AUBES4302                |
| 45.6 | AUBES4440              | 41.0 | AUBES2811 AUBES3282    | 42.0 | AUSNP000059              |
| 45.7 | AUBES4441 AUBES3590    | 41.0 | AUBES4371 AUBES3307    | 42.4 | AUBES3747                |
| 45.8 | AUBES2975 AUBES3274    | 41.1 | AUBES3692 AUBES2734    | 42.8 | AUBES3365 AUBES1113      |
| 45.8 | AUBES4688 IpCG0137_U11 | 41.1 | AUBES4963 AUBES1306    | 42.8 | AUBES4229                |
| 45.9 | AUSNP000062 AUBES4406  | 41.1 | AUBES3773 AUBES3955    | 43.1 | AUBES4427 AUBES4694      |
| 46.0 | AUBES2478              | 41.1 | AUBES3772 AUBES3795    | 43.2 | AUBES4443                |
| 46.0 | AUBES2005 AUBES4700    | 41.1 | AUBES3900 AUBES3892    | 43.3 | AUBES4401                |
| 46.0 | AUBES4331 AUBES2438    | 41.1 | AUBES4707              | 43.7 | AUBES1610                |
| 46.1 | AUBES4424              | 41.1 | AUBES3614 AUBES3852    | 43.8 | AUBES4591                |
| 46.3 | AUBES3117              | 41.1 | AUBES3792 AUBES3458    | 43.9 | AUBES2448                |
| 46.4 | AUBES4929 AUBES4897    | 41.1 | AUBES3613 AUBES3434    | 44.0 | AUBES4351 AUBES1918      |
| 46.4 | AUBES3446 AUBES2638    | 41.1 | AUBES2602 AUBES2606    | 44.1 | AUBES5305 AUBES3256      |
| 46.5 | AUBES5076              | 41.1 | AUBES3155 AUBES3759    | 44.2 | AUBES3194                |
| 46.7 | AUBES3237              | 41.1 | AUBES2623 AUBES3789    | 44.3 | AUBES3484 AUBES1730      |
| 46.8 | AUBES3445              | 41.1 | AUBES3457 AUBES2062    | 44.3 | IpCG0139-1_U18 AUBES5006 |
| 47.1 | AUBES4035              | 41.1 | AUBES1935 AUBES3698    | 44.4 | AUBES3381 AUBES5090      |
| 47.4 | AUBES3170              | 41.1 | AUBES3766 AUBES3845    | 44.4 | AUBES1942 AUBES3322      |
| 47.9 | AUBES1703              | 41.1 | AUEST0066 AUBES1793    | 44.4 | AUBES4627                |
| 48.8 | AUBES3402 AUBES4349    | 41.1 | AUBES3899 AUBES3255    | 44.5 | AUBES5330 AUBES3051      |
| 49.7 | IpCG0090_U11           | 41.1 | AUBES2195 AUBES2227    | 44.5 | AUBES3257 AUBES2057      |
| 52.3 | AUBES5218              | 41.3 | AUBES3015 AUBES3824    | 44.6 | AUBES4923 AUBES3324      |
| 53.0 | AUBES3595              | 41.3 | AUBES2952 AUBES2729    | 44.6 | AUBES5268                |
| 53.6 | AUBES4699              | 41.3 | IpCG0071_U22 AUBES3681 | 44.6 | AUBES1555 IpCG0217_U18   |
| 54.3 | AUBES3594              | 41.3 | AUBES3016 AUBES5342    | 44.6 | AUBES1786 AUBES3717      |
| 56.4 | AUEST0694              | 41.3 | AUBES4782 AUBES3323    | 44.6 | AUBES3485 AUBES2801      |
| 57.8 | AUBES2269              | 41.8 | AUBES3664 AUBES4049    | 44.6 | AUBES2597 AUSNP000009    |
| 58.4 | AUBES4567 AUSNP000086  | 41.8 | AUBES3309 AUEST0507    | 44.7 | AUBES4426 AUBES3749      |
| 59.0 | AUBES5039              | 41.8 | AUEST0473 AUBES4304    | 44.7 | AUBES2424                |
| 59.5 | AUBES3878              | 41.8 | AUBES3846 AUEST0427    | 44.7 | AUBES2802                |
| 60.1 | AUBES4685              | 41.8 | AUBES1185 AUBES4247    | 45.0 | AUBES3750                |
| 60.3 | AUBES2942              | 41.9 | AUBES3844 AUBES3398    | 45.2 | AUBES1763 AUBES1882      |
| 60.8 | AUBES1265              | 41.9 | AUBES3954 AUBES2779    | 45.4 | AUBES2731                |
| 61.1 | AUEST0944              | 42.0 | AUBES3097              | 45.6 | AUBES4442 AUBES3321      |
| 61.7 | AUEST1014              | 42.0 | AUBES3384              | 45.8 | AUBES4507                |
| 62.0 | AUBES4938              | 42.3 | AUSNP000040            | 46.1 | AUBES3855                |
| 62.1 | AUBES4686              | 42.4 | AUBES1564              | 46.6 | AUBES2263                |
| 62.5 | IpCG0157_U11           | 42.4 | AUBES3355              | 46.6 | AUSNP000098              |
| 63.0 | AUBES1630              | 42.8 | AUBES3280              | 46.7 | AUEST0922                |
| 63.4 | AUBES4774              | 43.0 | AUBES3591              | 47.0 | IpCG0110_U18             |
| 63.8 | AUBES2982              | 43.1 | AUBES3591              | 47.4 | IpCG0280_U18             |
| 64.0 | AUBES4127              | 43.5 | AUBES3683              | 48.6 | AUBES4345 AUBES4400      |
| 64.6 | AUBES4644              | 43.7 | AUBES3433              | 48.8 | AUBES1635                |
| 65.6 | AUEST0628L             | 43.9 | AUBES3823              | 49.6 | AUBES5252                |
| 65.9 | AUBES2814              | 44.1 | AUBES1282              | 50.7 | IpCG0118_U18             |
| 66.5 | AUEST0671              | 44.2 | AUBES3103              | 50.9 | AUBES4249                |
| 67.6 | AUBES2182 AUBES4341    | 44.7 | AUBES3831              | 51.1 | AUBES4075                |
| 68.5 | AUBES1752              | 45.2 | IpCG0178_U22           | 51.4 | AUBES2886                |
| 69.5 | AUEST0628              | 45.8 | AUBES2987              | 52.3 | AUBES2754                |
| 70.0 | AUBES3940              | 48.0 | AUBES5151              | 52.7 | AUBES3115                |
|      |                        | 54.0 | AUBES3784              | 53.0 | AUBES5286                |
|      |                        | 71.6 | AUBES2386              | 62.1 | AUBES4778                |
|      |                        |      |                        | 65.3 | AUBES1287                |
|      |                        |      |                        | 68.4 | AUBES2257 AUBES1283      |
|      |                        |      |                        | 69.0 | AUBES3569                |
|      |                        |      |                        | 72.5 | AUBES4366                |
|      |                        |      |                        | 73.2 | AUEST0713                |
|      |                        |      |                        | 74.9 | AUBES4000                |
|      |                        |      |                        | 78.6 | AUBES5197 AUBES5373      |
|      |                        |      |                        | 79.1 | AUBES4399                |
|      |                        |      |                        | 79.5 | AUBES5231 AUBES4493      |
|      |                        |      |                        |      | AUBES2204                |
|      |                        |      |                        |      | AUBES2316                |
|      |                        |      |                        |      | AUBES156                 |

0.0 AUBES5199  
 1.5 AUBES5227  
 2.6 AUBES2104  
 5.3 AUSNP000035  
 5.8 AUBES3833  
 6.2 AUBES1600  
 6.6 AUBES3819  
 6.9 AUBES1761 AUBES1607  
 7.0 AUBES1871  
 7.4 AUBES4658  
 7.5 AUBES5357  
 7.6 AUBES3055  
 7.9 AUBES1843  
 8.0 AUBES1435 AUBES4986  
 8.1 AUEST0429 AUBES3025  
 8.2 AUEST0840  
 8.2 AUBES1348  
 8.4 AUEST0691 AUBES3048  
 AUBES3533 AUBES4642  
 AUBES4166 AUBES3253  
 AUBES2103 AUSNP000073  
 AUBES5343 AUBES2916  
 AUBES2561 AUBES4639  
 AUNGS5111 AUBES5245  
 AUBES2051 AUSNP000018  
 AUBES3781 AUBES3259  
 AUBES1343 AUBES2809  
 AUBES3166 AUBES3105  
 AUEST0592  
 AUBES3970  
 AUBES3818 AUBES3118  
 AUBES4666 AUBES4280  
 AUBES2668 AUBES4973  
 AUEST0395 AUBES4689  
 AUBES2938  
 AUBES4274 AUBES3720  
 AUBES2709  
 AUBES5391  
 AUBES3162  
 AUBES5257  
 AUBES5055  
 AUBES3499  
 AUBES3817  
 AUEST0368  
 AUEST0295  
 AUBES2893  
 AUBES5347  
 AUBES4060  
 AUBES1410  
 AUBES4080  
 AUSNP000071  
 AUBES4840  
 AUBES4659  
 AUBES5078  
 AUBES4571  
 AUBES3653  
 AUBES3716  
 AUBES1368 AUBES3713  
 AUBES4815 AUBES3229  
 AUBES4501  
 AUSNP000031  
 AUBES2379  
 AUBES3373  
 IpCG0026\_U1  
 AUBES3199  
 IpCG0093\_U1  
 AUBES1436  
 AUSNP000016  
 AUBES3230  
 IpCG0275\_U1

0.0 MFAP3  
 1.8 MFAP2  
 3.5 MFAP1  
 5.8 AUEST0796  
 6.5 IpCG0150\_U27  
 6.9 AUEST0277U  
 7.8 AUEST0943  
 9.2 AUSNP000093  
 9.4 AUBES1885  
 11.0 AUBES4226  
 11.7 AUBES4677  
 19.0 IpCG0094\_U27  
 20.6 AUBES4506  
 29.4 AUEST0760  
 31.2 AUBES2260  
 32.6 CT53\_U27  
 35.0 AUEST0959  
 41.8 AUBES3739  
 43.5 AUBES3317  
 44.1 AUBES5050  
 47.8 AUBES3769  
 48.9 AUBES3302  
 51.3 AUBES2437  
 55.9 AUBES5056  
 59.0 AUBES5311  
 59.5 AUEST0954  
 59.9 AUBES2580  
 60.5 AUBES3070  
 61.7 AUBES1949  
 63.5 AUBES2523  
 64.0 AUNGS5104L  
 64.7 AUBES1867  
 65.2 AUBES2863  
 65.3 AUBES3225  
 65.9 AUBES4924  
 66.2 AUBES4612  
 66.5 AUBES2906  
 66.7 AUBES4956  
 66.9 AUBES3500  
 67.1 AUEST0829L  
 67.3 AUBES3501  
 67.7 AUBES4850  
 68.2 AUEST0422  
 69.2 AUBES3600 AUBES3939  
 69.5 AUBES4665  
 70.0 AUBES5304  
 71.5 AUBES3601  
 72.2 AUBES4478 AUEST0310  
 73.5 AUBES3980  
 75.1 IpCG0030\_U30  
 76.1 AUBES5309 AUBES5016  
 76.6 AUBES5224  
 76.8 AUBES4407 AUBES5319  
 76.9 IpCG0049\_U30  
 76.9 AUBES3632  
 77.0 AUBES3545 AUBES3942  
 77.3 AUBES3631  
 77.5 AUBES4828  
 77.6 AUBES3412  
 79.5 AUBES3943  
 79.9 AUEST0413  
 84.8 AUBES2444  
 98.0 AUEST0074

0.0 AUEST0813  
 22.6 IpCG0061\_U2  
 23.7 AUBES1904  
 25.1 AUBES1864  
 26.7 AUBES4756  
 29.3 AUBES3649 AUBES3424  
 29.6 AUBES3425  
 38.0 AUBES3204  
 39.4 AUBES2944  
 40.3 AUBES1859  
 41.0 AUBES2859  
 41.3 AUBES4763 AUBES3712  
 41.6 AUBES2816  
 42.0 AUEST0731  
 42.3 AUBES4475  
 42.6 AUBES2979  
 42.7 AUBES2601  
 42.8 AUSNP000095  
 42.9 AUBES4231  
 43.1 AUBES2371  
 43.4 AUBES2712  
 43.8 AUBES4781  
 43.9 AUBES2512  
 44.1 AUBES3527  
 44.2 AUBES4372 AUBES3577  
 44.2 AUBES5141 AUBES4491  
 44.3 AUBES3867 AUBES3872  
 44.3 AUBES3448 AUBES2717  
 44.5 AUBES4293  
 44.6 AUBES2520 AUBES5041  
 44.6 AUBES5255  
 44.7 AUBES4315 AUSNP000032  
 44.7 AUBES1377 AUBES3665  
 44.8 AUSNP000083 AUBES2076  
 44.8 AUBES2123 AUBES3871  
 44.9 IpCG0085\_U2 AUBES3914  
 44.9 AUBES4373  
 45.0 AUBES3474 AUBES4385  
 AUBES3714 AUBES2670  
 AUBES3837 AUBES3775  
 AUBES3090 AUBES3050  
 AUBES5361 AUBES4294  
 45.2 AUBES5019  
 45.3 AUEST0027  
 45.4 AUBES1137  
 45.6 AUBES2266  
 45.7 AUBES3473  
 45.9 AUBES5258  
 46.1 AUBES1538  
 46.6 AUBES2610  
 46.7 AUBES2703  
 47.0 AUBES5372  
 47.5 AUEST0856  
 47.7 IpCG0152\_U2  
 48.2 AUBES1183  
 48.4 AUBES4829  
 48.8 AUBES3866  
 49.4 AUBES3648  
 49.9 AUBES3315  
 50.6 AUEST0945  
 51.2 AUBES1765  
 51.7 AUEST0889  
 55.2 AUBES2481  
 61.1 AUBES3480  
 70.6 AUBES4643  
 71.3 AUBES1612  
 71.9 AUBES2844  
 72.7 AUBES3278  
 73.6 AUBES4744  
 78.7 AUBES4192  
 81.2 AUBES2217  
 83.9 AUBES2525

0.0 AUBES4575  
 10.0 AUSNP000045  
 18.1 AUBES1407  
 19.4 AUBES4384  
 19.9 AUBES4827  
 20.6 AUBES2374  
 21.1 AUBES4383  
 21.3 AUBES3612  
 22.5 AUBES1764  
 23.3 AUBES5287  
 24.2 AUBES4586  
 24.7 AUSNP000058  
 24.9 AUBES4713  
 25.1 AUBES4714  
 25.2 IpCG0107\_U28  
 25.6 IpCG0219a\_U23,U28 IpCG0219\_U23,U28  
 26.7 AUBES2211  
 31.5 AUBES5054  
 32.1 AUBES2406 AUBES1396  
 34.9 IpCG0160\_U28  
 35.9 AUEST0835  
 37.0 IpCG0096\_U28 AUBES2420  
 AUSNP000042 AUBES2571  
 37.1 AUBES3342 AUBES3049  
 AUBES4069  
 37.3 AUBES3124  
 37.6 AUEST0383  
 37.9 AUBES1888  
 38.0 AUBES2075  
 38.1 AUBES5186 AUBES4949  
 38.4 AUBES5011  
 38.7 AUBES4232  
 40.0 AUBES4913  
 40.5 AUBES4233  
 41.9 AUBES2277  
 42.1 AUBES3201  
 43.4 AUBES2664  
 44.3 AUBES1726  
 44.9 AUEST0800  
 45.5 AUBES2050  
 45.9 AUBES4919  
 46.0 AUEST0898  
 46.1 AUBES1273  
 AUBES4888 AUBES3233  
 AUBES5116 AUBES3708  
 AUBES4887 AUBES4928  
 AUSNP000023 AUBES3542  
 AUBES3967 AUBES3622  
 AUBES4225 AUBES2773  
 AUBES2115 AUBES2579  
 47.2 AUBES1725  
 48.1 AUBES1345  
 48.4 AUBES4138 AUBES4101  
 48.8 AUBES3054  
 49.0 AUBES3111  
 50.1 AUBES2497  
 50.9 AUBES3513  
 52.2 AUBES5130  
 52.9 AUBES3076  
 53.2 AUBES4843  
 53.3 AUBES3345  
 61.8 AUBES3546  
 64.6 AUBES3469  
 66.7 AUBES4066  
 67.9 AUBES3416  
 69.0 AUBES3470  
 71.6 AUBES1430  
 72.2 AUBES3497  
 72.8 AUBES5160  
 74.3 AUBES3496  
 76.4 AUEST0138  
 77.0 AUBES5222  
 77.6 AUEST0961  
 78.1 AUBES1178  
 78.6 AUSNP000049  
 82.4 AUEST0070  
 82.7 AUBES5175  
 83.2 AUEST0151  
 84.8 AUBES3989  
 85.5 AUEST0315  
 86.0 AUBES5392  
 86.3 AUBES4839  
 87.2 AUBES5350  
 87.3 AUBES5029  
 88.4 AUBES5007  
 88.9 AUEST0867  
 90.7 AUBES4838  
 94.5

0.0 AUBES4983  
 10.6 AUEST0876  
 11.7 AUBES5323 AUBES5384  
 12.3 AUEST0790  
 14.0 IpCG0304\_U12  
 15.7 AUBES1959  
 16.1 AUBES1723  
 16.6 AUBES4017 AUBES4759  
 17.4 AUBES2039  
 17.6 AUBES2228  
 18.1 AUBES5415  
 18.5 AUBES4885  
 20.6 AUBES2791 AUBES3311  
 32.3 AUBES4517  
 34.2 AUBES4516  
 35.0 AUEST0378  
 36.0 AUBES1567  
 39.1 AUBES5174  
 41.4 AUBES2071  
 43.4 AUBES2775  
 44.2 AUBES2795  
 46.0 AUBES2908  
 46.7 AUBES3089  
 46.8 AUBES1794  
 47.8 AUBES3555  
 47.9 AUBES3702 AUBES2609  
 48.2 AUBES3110  
 48.3 AUBES1887  
 48.5 AUBES3734  
 48.7 AUBES3486  
 48.9 AUBES4007  
 49.0 AUBES4082 IpCG0226\_U12  
 49.3 AUBES5281  
 AUBES3060 AUBES3393  
 49.6 AUBES3733 AUBES3149  
 AUBES3557  
 AUBES3439 AUBES4907  
 49.7 AUBES2761 AUBES3392  
 AUBES4622  
 AUBES3678 AUSNP000029  
 49.8 AUBES2637 AUSNP000021  
 AUBES3476 AUBES2422  
 AUSNP000019 AUBES5087  
 49.9 AUBES2045  
 50.3 AUBES5411  
 50.4 AUBES3440  
 50.5 AUSNP000064  
 50.8 AUEST0628U  
 51.1 AUBES2704  
 51.3 AUBES4464  
 51.5 AUBES2864  
 54.0 AUBES4918  
 54.6 AUBES4362  
 54.9 IpCG0227\_U12  
 55.1 AUBES4006  
 56.8 AUBES1594 AUBES2425  
 61.0 AUSNP000046  
 61.1 AUBES3030  
 61.3 AUBES5058  
 61.9 AUBES2924  
 64.4 AUBES4761  
 68.0 AUBES5329  
 68.7 AUEST0650  
 71.1 AUBES1331  
 74.7 AUBES1856  
 75.9 AUBES1896  
 77.9 AUBES2158  
 81.2 AUBES4264  
 83.1 AUBES2538  
 84.6 AUBES5015  
 84.8 AUBES2678 AUBES2977  
 88.7 AUBES4150  
 90.3 AUBES4149  
 90.8 AUBES5381  
 92.1 AUBES5240  
 93.6 IpCG0222\_U12  
 94.7 AUBES4118  
 99.0 AUEST0635  
 100.7 AUBES4397  
 101.5 AUBES4820  
 105.1 AUBES2510  
 108.1 AUSNP000053  
 109.7 AUBES2526  
 110.4 AUEST0409  
 114.2 AUEST0377

0.0 AUEST0054  
 3.5 AUSNP000056  
 4.2 AUEST0776  
 4.5 AUEST0034  
 7.1 AUBES4604  
 8.7 AUBES4605  
 9.6 AUBES2398  
 11.8 AUEST0870  
 15.6 AUBES4467  
 18.0 AUBES5401  
 19.2 AUBES2433  
 27.1 AUBES4783  
 30.4 AUBES3987  
 43.4 AUEST0526  
 45.2 AUEST0479  
 48.0 AUBES3932  
 48.9 AUBES5037  
 49.3 IpCG0033\_2pt  
 49.7 AUBES4322  
 50.4 AUBES2235  
 51.8 AUBES4872  
 52.3 AUBES4871  
 52.8 AUBES2352  
 52.9 AUBES4155  
 53.3 AUBES4473  
 53.6 AUBES4447  
 53.9 AUBES3584  
 54.1 AUBES4431  
 54.2 AUSNP000028  
 54.4 AUBES5278  
 54.8 AUBES3585  
 AUBES2566 AUBES1340  
 54.9 AUBES5034 AUBES2753  
 55.1 AUBES4811 AUBES1166  
 55.4 AUBES4430  
 55.5 AUBES5325  
 56.0 AUBES4154  
 56.4 AUBES5324  
 57.0 AUEST0537  
 57.7 AUBES5399 AUBES3618  
 57.9 AUBES3617  
 58.4 AUBES5150  
 58.6 AUBES3435  
 58.8 AUBES2079  
 58.9 AUBES3214 AUBES3616  
 AUBES3615 AUBES3254  
 59.8 AUBES2456  
 59.9 AUBES1112  
 60.5 AUBES1855  
 61.0 AUEST0286L  
 61.6 AUBES3436 AUBES3426  
 62.9 AUBES3549  
 63.3 AUBES1922  
 64.5 AUBES3329  
 65.9 AUBES5339  
 67.4 AUSNP000087 AUSNP000082  
 70.2 AUBES4982  
 71.0 AUBES3640  
 71.5 AUBES2767  
 72.6 AUEST0777  
 72.9 AUEST0516 AUEST0762  
 73.2 AUBES4455  
 74.3 AUBES1965  
 75.3 AUBES4361  
 75.8 AUSNP000081  
 76.0 AUBES3957  
 76.3 AUSNP000041  
 77.0 AUBES1529  
 78.2 IpCG0120\_U26  
 80.1 AUBES1575  
 83.2 AUEST0307  
 87.0 AUEST0953

0.0 AUBES3581  
 2.8 AUBES2891  
 3.7 IpCG0113\_U4  
 4.6 AUBES3541  
 5.2 AUBES1775  
 6.5 AUBES3304 AUBES3873  
 7.7 AUBES3875 AUBES2999  
 8.3 AUEST0060  
 8.4 AUBES1906  
 8.4 AUBES3407 IpCG0238\_U4  
 9.0 AUBES3132  
 9.9 AUBES2357  
 11.3 AUEST0685  
 11.4 IpCG0179\_U4 AUBES5403  
 AUBES2479 AUEST0059  
 12.6 IpCG0268\_U4  
 15.2 AUBES2404  
 17.5 AUBES3620  
 20.7 AUBES1737  
 22.0 AUBES3040  
 24.6 AUEST0782  
 25.7 AUBES3031  
 28.0 AUBES3937  
 28.8 IpCG0263\_U4  
 29.4 AUBES5310  
 30.1 AUBES2861  
 30.8 AUBES2522  
 31.0 AUBES3131  
 31.3 AUBES3728  
 31.5 AUBES3431  
 31.9 AUBES5038 AUSNP000024  
 32.1 AUBES4931 AUBES3619  
 32.2 AUBES2570  
 32.4 AUBES3072 AUBES2725  
 32.5 IpCG0002\_U4  
 32.8 AUBES3938  
 33.0 AUBES3965  
 33.2 AUBES2903  
 33.5 AUBES3506  
 33.6 AUBES3071 AUBES4240  
 AUBES2943 AUBES1912  
 33.9 AUBES3265 AUSNP000022  
 AUBES4124 AUBES2752  
 AUBES2391  
 34.0 AUBES3354 AUBES2599  
 34.1 AUBES3100 AUBES4621  
 34.4 AUBES3191 AUBES2622  
 34.6 AUBES2581  
 34.8 AUBES2469  
 35.0 AUEST0750 AUBES3432  
 35.1 AUBES3736  
 35.4 AUBES3158  
 35.7 AUBES1728  
 35.8 AUBES1733  
 36.4 AUBES2881  
 36.7 AUBES1936  
 37.4 AUBES3507  
 38.7 IpCG0145\_U4  
 40.0 AUBES5265  
 40.9 AUBES4848  
 41.8 AUBES4208  
 42.7 AUBES5379  
 42.9 AUBES3314  
 44.1 AUBES1571  
 44.7 AUBES3835  
 46.0 AUBES5363  
 46.1 AUEST0509  
 47.6 AUEST1006  
 48.6 AUBES2783  
 49.2 AUBES2831  
 49.4 AUBES5215  
 51.1 IpCG0289\_U4  
 51.6 AUBES4030  
 57.0 AUEST0126  
 57.6 AUBES4739  
 59.4 IpCG0054\_U4  
 59.7 AUEST0727  
 64.1 AUBES5223  
 69.5 AUBES2344  
 82.1 AUEST0804  
 83.2 AUBES4329  
 88.3 AUEST0330  
 90.5 AUEST0802  
 93.4 AUBES5358  
 93.7 AUBES1869

0.0 AUBES2910  
 11.4 AUBES2679  
 12.9 AUBES5243  
 14.3 AUBES3586  
 15.8 AUBES4305  
 18.0 AUBES3587  
 18.1 AUBES4629 AUBES4799  
 19.8 AUBES4628  
 24.4 AUBES4445 AUBES4429  
 AUBES4428  
 28.0 IpCG0104\_U13  
 30.5 AUBES2072  
 37.1 AUBES4835  
 45.1 AUBES2431  
 46.0 AUBES2488  
 50.4 AUBES4314  
 50.6 AUBES1374  
 50.9 AUBES5375  
 54.6 AUBES3014  
 60.9 AUBES4818  
 62.3 AUEST0277Ma  
 63.1 AUEST0502  
 63.4 AUBES3366  
 64.0 AUBES2749  
 64.2 AUBES1950  
 64.3 AUBES2758  
 64.8 AUBES3562  
 65.7 AUBES5115  
 66.3 AUBES3915  
 69.5 AUBES2620  
 70.8 AUBES3723  
 71.2 AUBES2611  
 71.6 AUBES2274  
 71.9 AUBES3783  
 72.1 AUEST0350  
 72.3 AUBES3919  
 72.4 AUBES4808  
 72.8 AUEST0381  
 73.1 AUBES3224 AUBES2387  
 IpCG0262\_U13  
 73.2 AUBES3023 AUBES3196  
 AUBES3362 AUBES2069  
 AUBES3861 AUBES2632  
 73.3 AUBES2786 AUBES3368  
 AUBES5360 AUBES4910  
 73.4 AUBES3151 AUBES2397  
 73.5 AUBES4883  
 IpCG0296\_U22 AUBES3249  
 73.7 AUBES3348 AUBES2594  
 AUBES1876  
 74.0 IpCG0083\_U13  
 AUBES3353 AUBES4234  
 74.2 AUBES3219  
 74.5 AUSNP000070  
 74.8 IpCG0221\_U13  
 75.1 AUBES3190  
 75.3 AUBES4948  
 75.7 IpCG0298\_U13  
 76.2 AUBES4905  
 76.5 AUBES2588  
 77.3 AUBES3788 AUBES4806  
 77.4 AUBES3637  
 77.5 AUBES1886  
 78.1 AUBES3112  
 78.7 AUEST0064  
 79.5 AUBES5022  
 80.2 AUBES5145  
 81.5 AUBES2978  
 82.5 AUBES2940  
 83.1 IpCG0267\_U13  
 83.2 AUBES2877  
 83.5 AUBES1852  
 84.4 AUBES1096  
 87.3 AUBES4954  
 88.6 AUEST0476  
 92.4 AUBES5210  
 96.2 AUEST0664  
 97.5 AUBES4534  
 102.8 AUBES4433  
 103.8 AUBES4432  
 105.9 AUBES4965 AUSNP000034  
 107.2 AUEST0744  
 109.5 AUBES5383  
 111.6 AUBES4063

0.0 | IpCG0127\_U16  
 1.8 | IpCG0278\_U16  
 2.1 | AUEST0658  
 2.7 | IpCG0108\_U16  
 3.2 | AUEST0668 AUEST0715  
 3.4 | AUEST0389  
 3.6 | IpCG0305\_U16  
 3.8 | AUEST0819  
 4.1 | AUBES4415  
 4.2 | AUBES3213  
 4.6 | AUBES3742 AUBES1536  
 AUBES4853 AUBES4969  
 AUBES2616 AUBES2974  
 4.7 | AUBES3222  
 4.9 | AUBES3300  
 AUBES1550  
 5.2 | AUEST0051 AUBES4664  
 AUBES4185 AUBES5035  
 AUEST0137 AUBES2466  
 AUBES3609 AUBES2659  
 AUBES4320 AUBES3221  
 AUBES3085 AUBES3168  
 AUBES2604 AUBES2730  
 AUBES4375 AUBES2636  
 AUBES5083 AUBES4663  
 AUEST0100 AUBES3551  
 AUBES4416 IpCG0057\_U16  
 AUBES5135 AUBES3924  
 AUBES1704 AUBES4009  
 AUBES2054 AUBES2121  
 AUBES2750 AUBES4896  
 AUEST0825 AUBES4242  
 AUBES2605 AUBES4750  
 AUSNP000015 AUBES3466  
 AUEST0773 AUBES3379  
 AUBES2417 AUBES5233  
 AUBES4512 AUBES3779  
 AUBES4323 AUBES2108  
 AUSNP000017 AUBES4402  
 AUSNP000030 AUBES5082  
 AUBES3347 AUBES2955  
 AUBES3583 AUBES3374  
 AUBES2392  
 AUBES3579  
 AUBES4403 AUBES2567  
 AUBES3454 AUBES3947  
 AUBES2873  
 AUBES4279  
 AUBES3437  
 AUBES4884  
 AUBES4909  
 AUBES1982  
 AUBES3346  
 AUBES1916  
 AUEST0593  
 AUBES2267  
 AUBES4369  
 AUBES3465  
 AUBES2002  
 AUBES3580  
 AUEST0402

0.0 | AUBES2930  
 0.6 | AUBES5251  
 AUBES2067  
 3.3 | AUBES3449 AUBES3552  
 8.7 | AUBES4933  
 AUBES5314 AUBES5390  
 9.6 | AUBES4933  
 9.7 | AUBES5314 AUBES5390  
 10.5 | AUEST0988  
 11.8 | AUBES2968  
 12.6 | AUBES4183  
 13.5 | AUBES1325  
 15.3 | AUBES2650  
 18.7 | AUBES5345  
 19.2 | AUBES5333  
 20.6 | AUBES1619  
 25.2 | AUBES4260  
 25.7 | AUBES4182  
 27.6 | AUBES2900  
 28.3 | AUEST0866L  
 29.1 | IpCG0193\_U14  
 30.3 | AUBES2696  
 30.4 | AUBES3785  
 30.9 | AUBES3361  
 31.7 | AUBES2826  
 32.3 | AUEST0353  
 32.7 | AUBES3303  
 32.8 | AUBES3391  
 32.9 | AUBES4051  
 33.3 | AUEST0347  
 AUBES5374 AUBES2608  
 AUBES4912  
 AUBES4682 IpCG0046\_U14  
 AUBES5271 AUBES2932  
 AUBES2812 AUBES5242  
 AUBES1539 AUBES3310  
 AUBES3415 AUBES5389  
 AUBES3414 AUBES3689  
 AUBES3263 AUBES2501  
 IpCG0063\_U14 AUBES1772  
 AUBES1768  
 33.7 | AUBES1768  
 33.9 | AUBES3208 AUBES3161  
 34.2 | AUBES1980  
 34.4 | AUBES2549  
 34.9 | AUBES3088  
 35.1 | AUEST0043  
 37.0 | AUBES4285  
 39.5 | AUBES5018  
 39.6 | AUBES4615  
 39.9 | AUBES4856  
 40.1 | AUBES2686  
 41.3 | AUBES2341  
 42.7 | AUEST0348P  
 43.3 | AUBES3991  
 44.2 | AUBES2102  
 44.9 | AUBES2856  
 45.9 | AUBES5136  
 67.7 | AUEST0067  
 69.2 | AUBES5334  
 70.5 | AUEST0786  
 73.6 | AUBES4738

0.0 | AUEST0032  
 5.6 | AUEST0286U  
 8.9 | AUEST0999  
 19.0 | AUBES4224  
 21.1 | AUBES4754  
 22.6 | AUBES5338 AUBES1090  
 26.3 | AUBES2101  
 27.4 | AUBES3979  
 27.6 | AUBES1971  
 31.1 | AUBES2909  
 31.6 | AUBES4241  
 33.2 | IpCG0149\_U31  
 33.5 | AUBES1892  
 34.1 | AUBES2348  
 34.5 | AUBES2612  
 35.7 | AUBES3516  
 38.1 | AUEST0992  
 39.2 | AUBES2245  
 39.7 | AUBES2509  
 40.4 | AUBES3755  
 40.9 | AUBES5366  
 41.0 | AUBES5326  
 41.2 | AUBES1699  
 41.3 | AUBES3296  
 41.6 | AUEST0349  
 41.7 | AUBES1880 AUBES2919  
 41.9 | AUBES4005  
 42.4 | AUBES4863  
 43.0 | AUEST0814  
 43.4 | AUBES1946 AUBES2354  
 43.9 | AUBES4034  
 44.0 | AUBES2746 AUSNP000066  
 44.3 | AUBES5369  
 44.7 | AUBES4947  
 45.2 | AUEST0023  
 47.6 | AUBES3933  
 48.2 | AUBES2641  
 51.1 | AUBES2463  
 55.0 | AUBES5159  
 57.5 | AUBES3763  
 60.7 | AUBES5365  
 62.5 | AUBES4942  
 63.2 | AUBES2163  
 64.0 | AUBES4259  
 64.7 | AUBES3770  
 68.0 | AUBES1332  
 70.0 | AUBES4585  
 71.9 | AUBES1544  
 76.1 | AUBES5021  
 80.0 | AUBES1284  
 90.9 | AUBES4479

0.0 | AUBES1434  
 1.1 | AUBES4526  
 4.1 | AUBES4021  
 5.6 | AUBES3009 AUBES3801  
 AUBES3320 AUBES4020  
 AUBES2798 AUBES2996  
 AUBES5288  
 5.9 | AUBES3802  
 6.0 | AUBES2415  
 6.5 | AUBES4379  
 7.3 | AUBES2019  
 7.9 | AUEST0152  
 8.9 | AUBES3909  
 11.1 | AUBES2618  
 12.5 | AUBES1161  
 16.6 | AUBES3741  
 17.2 | AUBES3270  
 17.8 | AUEST0842  
 18.7 | AUBES2694  
 19.9 | AUBES5382  
 21.5 | AUBES2724  
 24.4 | AUEST0596  
 28.5 | AUSNP000060  
 29.0 | AUBES1338  
 29.8 | AUBES3494  
 30.4 | AUSNP000065  
 30.6 | AUEST0086  
 31.6 | IpCG0181\_U21  
 33.0 | AUBES2059  
 34.2 | AUBES5010  
 34.8 | AUEST1013  
 37.2 | AUBES1759  
 37.4 | AUBES5353  
 38.3 | AUBES4525  
 39.5 | AUBES5004  
 39.7 | AUBES2367  
 40.7 | AUBES5178  
 41.8 | AUBES4019  
 42.1 | AUBES4749  
 43.1 | AUBES2889  
 43.8 | AUBES1271  
 44.2 | AUEST0696  
 45.0 | AUBES4787  
 45.5 | AUBES5320  
 47.0 | AUBES1277  
 47.4 | AUBES2990  
 47.5 | AUBES4746  
 47.6 | AUBES3746 AUBES1750  
 48.2 | AUBES3560  
 49.3 | AUBES2701  
 49.3 | AUBES4776  
 49.8 | AUEST0720  
 50.4 | AUBES2928 AUSNP000057  
 AUEST0663  
 AUBES3535  
 50.5 | AUBES4660 AUBES3839  
 AUBES3390  
 51.0 | AUBES4662 AUBES4661  
 AUBES1351 AUBES3228  
 51.1 | AUBES3227  
 51.2 | AUBES3905  
 53.0 | IpCG0204\_U21  
 53.5 | AUBES1591  
 54.0 | AUBES3313  
 54.3 | AUEST0417  
 54.4 | AUBES3133  
 54.6 | AUBES2716  
 54.9 | AUBES4497  
 55.0 | AUBES3539  
 AUBES2933  
 55.1 | AUBES2822 AUBES1710  
 AUBES5294 AUBES5316  
 AUBES4311 AUBES3382  
 AUBES2127 AUBES3621  
 AUBES3520 AUBES4695  
 IpCG0287\_U21  
 55.5 | AUBES4236 IpCG0106\_U21  
 AUBES2596 AUBES5250  
 AUBES4237 AUBES5253  
 AUSNP000079 AUBES4064  
 AUSNP000055  
 AUBES4045 AUBES3464  
 56.0 | AUBES3463  
 56.3 | AUBES5030  
 56.5 | AUBES2778  
 56.6 | AUSNP000014  
 57.0 | AUBES3079  
 57.6 | AUBES4283  
 58.1 | AUBES2467  
 58.5 | AUBES2147  
 59.6 | AUBES2882  
 60.3 | IpCG0148\_U21  
 60.9 | AUBES1245  
 61.4 | IpCG0076\_U21  
 61.8 | AUBES4711  
 62.3 | AUEST0752  
 63.8 | AUBES4857  
 64.7 | AUBES4536  
 67.3 | IpCG0264\_U21  
 68.3 | AUBES3234  
 70.0 | IpCG0171\_U21  
 83.5 | AUBES5047  
 91.0 | AUSNP77558

21

0.0 AUBES2564  
 0.8 AUBES3001 AUEST0275  
 1.4 AUBES2876  
 1.7 AUBES5013  
 2.4 AUBES3336  
 5.1 AUBES3087  
 5.8 AUEST0298  
 6.6 AUBES2607  
 6.9 AUBES3360  
 7.4 AUBES3147  
 7.5 AUBES1569  
 8.3 AUBES2874  
 8.8 AUBES1629  
 8.9 AUBES4803  
 9.5 AUBES2808  
 9.6 AUBES2603 AUBES3169  
 9.9 AUBES3948  
 10.3 AUBES1973  
 10.4 AUBES5307  
 10.5 AUBES3757  
 AUBES5221 AUBES2936  
 AUBES2511 AUBES3218  
 AUBES1879  
 AUBES2735  
 AUBES1502  
 AUBES3084 AUSNP000088  
 AUBES3927  
 AUBES3142  
 AUSNP000085  
 AUBES3352  
 AUBES1700  
 AUBES2619  
 AUBES1168  
 AUBES3295  
 AUBES5086  
 AUBES2212  
 AUBES2099  
 AUBES3643 AUBES3642  
 AUBES3534  
 AUBES2755  
 AUBES3523  
 AUBES5069  
 AUBES5012  
 AUBES3232  
 AUBES1418  
 IpCG0038\_U23  
 IpCG0147\_U23  
 AUBES4997  
 AUBES4095  
 AUEST0393  
 AUBES4096  
 AUBES5283  
 AUBES3242  
 AUBES5405  
 AUBES4419 AUBES1945  
 AUBES1624  
 AUEST0010  
 AUBES3972  
 AUBES3971  
 AUBES3556  
 AUBES4405  
 AUEST0022  
 AUBES4404  
 AUBES1299  
 AUBES1298  
 AUBES1405  
 AUEST0017

22

0.0 AUBES4026  
 0.1 AUEST0757 AUBES4025  
 3.9 AUBES4775  
 6.2 AUBES5239  
 12.9 AUBES5368  
 14.7 AUBES4459  
 20.3 AUBES4094  
 26.0 AUBES1448  
 26.7 AUEST0794  
 27.1 AUBES4779  
 28.7 AUBES1941  
 30.3 AUBES4723  
 40.4 AUBES3925  
 42.9 AUEST0322  
 54.8 IpCG0024\_U17  
 AUBES3167 AUBES2635  
 AUBES2232  
 AUBES3378  
 AUBES3163  
 AUBES1863  
 AUBES1593  
 AUBES4854  
 AUBES3814 AUBES2593  
 AUBES3553  
 AUBES4930  
 AUBES1323  
 AUBES1968  
 AUBES4670  
 AUBES3156  
 AUBES3815  
 AUBES3059  
 AUBES4488 AUBES2830  
 AUBES3729 AUBES4844  
 AUBES4845  
 AUBES2565 AUBES3406  
 AUBES2817 AUBES1996  
 AUBES2369 AUBES3187  
 AUBES2591  
 AUBES4470 AUBES3297  
 AUBES3198 AUBES3719  
 AUBES5393 AUBES1227  
 AUBES4558 AUBES3456  
 AUBES2737 AUBES3192  
 AUBES3038 AUBES1717  
 AUBES3292 AUBES3813  
 AUBES1702 AUBES2645  
 AUBES3405 AUBES5031  
 AUBES3916  
 AUBES3518  
 AUEST0369  
 AUBES3807  
 AUBES2271  
 AUBES5209  
 AUBES2237  
 AUBES2888  
 AUBES2047 AUBES2389  
 AUBES3519  
 AUBES3109  
 AUEST0466  
 AUEST0477  
 AUEST0780  
 IpCG0231\_U17

23

0.0 AUBES4636  
 0.6 AUBES4266 AUBES2875  
 AUBES4200  
 AUBES4804  
 AUEST0704  
 AUBES5091  
 AUBES3033  
 AUBES3847  
 AUBES4735  
 AUBES4392  
 AUBES2255  
 AUBES3046  
 AUBES2736  
 IpCG0228\_U19  
 AUBES3102  
 AUBES4900  
 AUBES2025  
 IpCG0169\_U19  
 AUBES3188  
 AUBES1606  
 IpCG0139-2\_U18  
 AUBES5129  
 AUBES3159 AUBES4137  
 AUBES5394  
 AUBES3217 AUBES1361  
 AUBES2251 AUBES2484  
 AUBES3691 AUBES4412  
 AUBES2937  
 AUBES1330 AUBES4010  
 AUBES5354 IpCG0183\_U19  
 AUBES4132 AUBES2625  
 AUBES4113 AUBES5084  
 AUBES5359  
 AUBES4136 AUBES5065  
 AUBES1801  
 AUBES3657 AUBES5009  
 AUBES4148 AUEST0348C  
 AUBES4147 AUBES5301  
 AUBES5285  
 AUBES5302  
 AUEST0149  
 AUBES4313  
 AUBES1506  
 AUBES5386  
 AUBES5211  
 AUBES2962  
 AUBES5238  
 AUBES4683  
 IpCG0011\_U19  
 AUBES4327  
 AUBES1900  
 AUBES1411  
 AUBES4116  
 AUBES4115  
 AUBES1877  
 IpCG0031\_U19  
 AUBES4032  
 AUBES4580 AUBES4676  
 AUBES1328  
 AUBES4031  
 AUBES5291  
 AUBES4290  
 AUBES4289  
 AUSNP000012

24

0.0 IpCG0072\_U8  
 4.8 AUBES3062  
 5.2 AUBES2490  
 7.2 AUBES1978  
 9.1 IpCG0285\_U8  
 11.2 AUBES2563 AUBES2583  
 12.5 AUBES3281  
 12.9 AUBES3931  
 13.7 AUBES4630  
 14.1 AUBES3711  
 AUBES2513 AUBES3902  
 AUSNP000026 AUBES2788  
 AUBES2848 AUBES3305  
 AUBES2658 AUSNP000010  
 AUBES3335 AUBES3073  
 AUBES4742  
 AUBES4995 AUBES3481  
 AUBES4917 AUBES5008  
 AUBES3375 AUBES3206  
 AUBES3041  
 AUBES1551 AUBES2720  
 AUEST0866U  
 AUSNP000096  
 AUBES3693  
 AUBES4826  
 AUBES3910  
 AUBES5179  
 AUBES5063  
 AUBES4865  
 AUBES2681  
 AUBES4360  
 IpCG0265\_U8  
 AUBES4864  
 AUBES3503  
 AUBES3502  
 IpCG0112\_U8  
 AUBES4728  
 AUBES4616  
 AUBES2732  
 AUBES3926  
 AUBES1334  
 AUBES1956  
 AUEST0242  
 AUBES2068  
 AUBES5003  
 AUBES4807  
 IpCG0236\_U8  
 AUBES4381  
 AUBES3944  
 AUEST0385

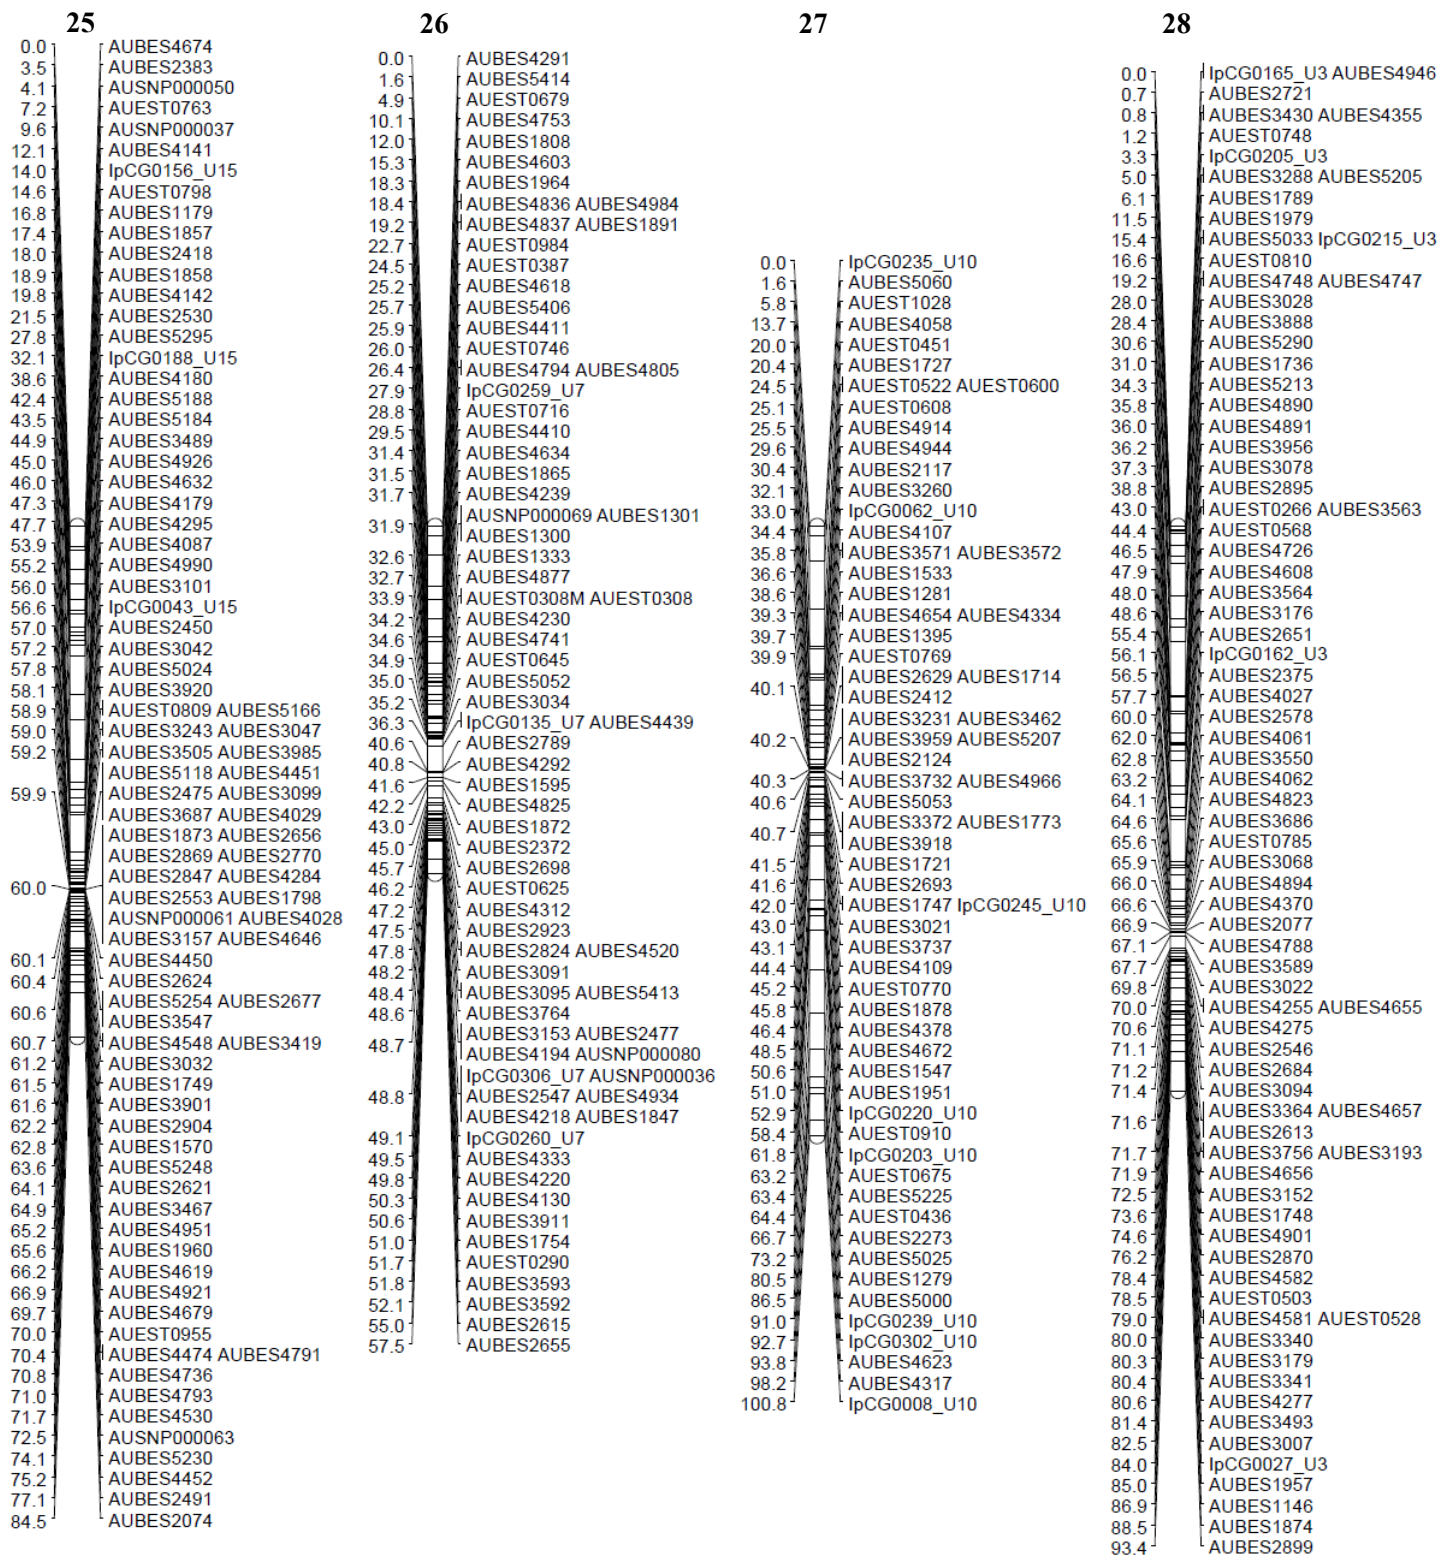

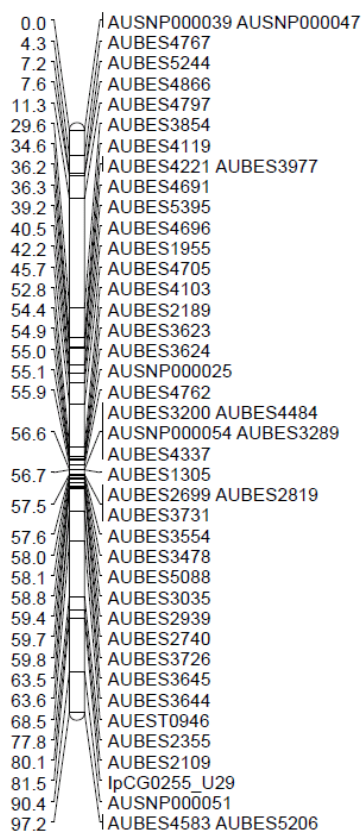

**Figure S1** A sex-averaged linkage map of channel catfish. Genetic map distance was given in centimorgans (Kosambi's mapping function) to the left of the markers positions. The vertical straight lines indicated markers placed at the same positions.
