# Supplementary material for: Second-Generation Genetic Linkage Map of Catfish and Its Integration with the BAC-Based Physical Map
Source: G3 (Bethesda). 2012 Oct 1;2(10):1233–41. doi: 10.1534/g3.112.003962 (PMC3464116; doi:10.1534/g3.112.003962)
Supplement: Supporting Information [file supp_2.10.1233_TableS1.xlsx]

## Sheet: Sheet1
Table S1: Detailed information regarding contig identities, estimated physical contig sizes, corresponding linkage groups, and genetic map positions of 2,099 BAC-end sequence mapped microsatellite markers
Marker	Contig	Contig length (Kbp)	Linkage group	Map position	Forward primer	Reverse primer	BAC_ID
AUBES5416	3545	172.502	7	66.982	TTGTGTCTTGTGGGCTATGTG	AAGGTGGGTGAAAGAGTAGTTACAG	057B1E05
AUBES5415	3544	162.355	13	18.09	GATGACGACGCTCTGGAAAT	GGAATGAAAGACAGAGCGAGA	035A1G08
AUBES5414	3541	109.928	26	1.599	AACCACTGTCCTGAGGGATG	GATATCCTCGGGGAATAGGG	108B1G01
AUBES5413	3538	123.458	26	48.448	GCGTGGTCTTTGTACTGTGG	AACTGTCGTTACTAAAAGGCTCA	043B2H10
AUBES5412	3537	164.046	2	47.45	GGAGCTGCAATAGGGCTTT	TTGAAGTCTGAATTTGCTGCAC	085B1C11
AUBES5411	3536	192.797	13	50.345	CTTCCTGTCCACCAGAGAGC	ATTCTCCTGGTGCTCCCAAT	002B2C02
AUBES5410	3534	165.738	2	35.608	TGAGCTTCTACTCAGCTGTTGG	ATCACGCAGCTGCCTAAGTT	096A1A11
AUBES5409	3528	179.267	4	61.094	AGTGGCACACTGCACAAGAC	TGGGAGGAAACAGTGTCAAA	074B2B01
AUBES5408	3523	172.502	2	70.16	AACTTCCAAGCAGTGCGGTA	CGAGAGCACTTAAACCCTGAA	063A2A08
AUBES5406	3512	157.282	26	25.722	GAGCTAGCTAGGCAGCATGAG	CAGGTTACCCCGCTAGCTAGTAT	014B2D09
AUBES5405	3496	219.856	21	45.644	ACCAGAGAACAGCCGGTAGA	GGACCTCGGGATCGTTATTC	048B2A10
AUBES5403	3483	240.15	15	11.367	CGAACGTCTTTGAGTTGTTGT	TGGAAATCTCCTTTTCCAGGT	052B1G11
AUBES5401	3475	248.606	14	18.009	AAGGTCACGGCTAGGTCAAA	TATCCGCTGGGCAATTCTAT	053A2B06
AUBES5399	3472	150.517	14	57.671	CAGAATACGGCCCAGACATT	CAGCCTTTCTGGAGCTTTGT	087B2C09
AUBES5397	3463	206.326	4	57.451	GGATCCTGCACTCAGTCGTT	CAAGAGCATCCACTCACCAA	045B2D11
AUBES5395	3457	275.666	29	39.193	GAACCCATCACTTTGTCACG	TCTTATTTCCCCAAAATCAATCA	079A2A05
AUBES5394	3443	145.443	23	23.839	ACGGAGACGAGGGAGAAAAT	ATCTTGTTTCCCGGTGAATG	084A2G11
AUBES5393	3429	174.194	22	66.259	ATGCCACAGTGATGGAATGA	ATCGCACCGAGAGAAGAGAA	112B2A02
AUBES5392	3427	91.3248	12	86.318	CGAGGAACAATTCGGGTCTT	TCCCTGCCACTTCAGAAGATA	092A2C01
AUBES5391	3421	187.723	9	10.128	AGGCATTTCCTTCACTGTGTC	CGACAGTTAGCCAGCTCAAA	090B1C02
AUBES5390	3417	224.93	18	9.748	TCATCCCAAGACAACCTGAAC	GACCCCTTTCCCAGATCAAG	088A1D10
AUBES5389	3412	197.87	18	33.582	GTGCAGTGCGTGTTCAGTTT	CAGCGTCTAACAGCACACAAG	087B2B05
AUBES5388	3409	211.4	4	59.497	ATGGAGGCACAAAAAGCACT	GCGCAAACTTTCAGTACCAC	076B1B02
AUBES5387	3406	197.87	2	41.968	AGTCAGTGCAGCTGGTTCAA	GGCCATTTGCCTTAATGTCT	038A2H03
AUBES5386	3401	268.901	23	32.291	TGTTCCTGCTGTCTGAGCTTT	CCTCAGTCCTTCCTTCTTGCT	005A2C05
AUBES5384	3399	211.4	13	11.69	TACAGGTGAGGGGGTGCTTA	CATATTAACCAAGGGTGCCAAT	046B1A12
AUBES5383	3398	89.6336	16	109.523	CCCTTTGGGACCACTATCAA	CGACGGCAGATAAATCCAGT	047A1B11
AUBES5382	3395	306.107	20	19.882	TTGGCACCATTCTGTTTCAC	AATGCCTAGGTCACGGTTTC	056B2B02
AUBES5381	3383	304.416	13	90.798	TCATGCCACTGCTTCGAATA	CAGCCCATAAAGAGGTGCAT	072A1C04
AUBES5380	3381	194.488	4	66.398	TACTGCCACTTGAGCGACTG	GCGTCTGAAACAGAAGCAGA	025B2A09
AUBES5379	3374	214.782	15	42.676	TGTCCGCATCTCATGTCATC	ATTGTGCTTCATGTCGCTTG	087A1C06
AUBES5377	3363	235.077	4	61.831	TTGCAAACAGCTGAAAGTCTG	CGCAAGGTCACAAATGAAGA	054B2A11
AUBES5375	3354	250.298	16	50.861	GCCTCCTGACCAATCACAAT	TCACGGTGCTCAAGTACTGC	052B2B09
AUBES5374	3352	196.179	18	33.391	AATGCAATATGCTTGACAACCT	TGCATATATCCACCTTTGCTT	022B2D10
AUBES5373	3349	230.003	8	79.082	TTGGATTTGCTTGCCTACCT	GGAGCAAGTGGAGGAGTTGA	011B2F10
AUBES5372	3336	111.619	11	47.012	CTTGAAGTTGGTGGAAAACAA	AAGTTCATGGCACTTGCTACA	020B2E06
AUBES5370	3321	87.9424	6	40.813	TCAGGGACTTCCACTCAAAAG	AGATTCTTGGACCCCACTGT	101A2D01
AUBES5369	3320	213.091	19	44.263	AACTCGTACCGAGACGAAGC	GATGAAGCGTGTTTCACAGC	075A1D06
AUBES5368	3316	133.605	22	12.895	GTGTGTCAAAGAAGGTCACGA	CGAAGCCGGTCTGAAAGTTA	052B2A07
AUBES5366	3307	186.032	19	40.859	GGATCCACCATACAGAATCCA	ACAGCCAGCTCAATGTTGC	048B1E11
AUBES5365	3303	260.445	19	60.691	TGCACTTGGTTGATATTGGAA	GGACGCCACAATTTTCTGTAA	111A2B10
AUBES5363	3293	250.298	15	46.009	CGTAGTTTGGTTTTCGTTATAGG	CGATATGAACGCGAACATTAAA	013B1A01
AUBES5362	3292	204.635	5	9.114	CTGGACGAGCTCCAGGTAAC	TCGCTCACCTTGATCTATGC	070A2A08
AUBES5361	3288	235.077	11	44.979	CGAGGGGGAGAGACACATAC	CCGTTCTGCCTGTTTTGAGT	095B2F10
AUBES5360	3285	184.341	16	73.349	AGCCACCGCTTCCTCTTAAT	GACAGGGATAGGCTGGTGTG	057B1F09
AUBES5359	3283	399.123	23	25.188	CACTGTCAAGCTGCAAAAGC	TGATTCAGTCTGCTGCTTGG	078A1G06
AUBES5358	3282	224.93	15	93.434	TCGCCAATATATTACAGCATGAA	TGCTGGATCAAGTGCTATTCT	032A1B05
AUBES5357	3276	243.533	9	7.475	CACATTCATGCAGTGTTTGG	CCTTGCTTCCCTGTTCAGAC	079B1C08
AUBES5354	3268	204.635	23	25.153	CTGAAGCCAGTTCTCCTGTG	CAGCATGTGAAGTTGTGTTGG	073A1D07
AUBES5353	3260	213.091	20	37.42	CAGATATCCATCTCTGTCCATCA	ACAGACAGACCGGCAGATG	022A2F11
AUBES5350	3248	131.914	12	87.272	TAACCTGGTCCCAGATTTGC	TTGAGTAGTAATGTTGAGTAATGCTGA	008B2F07
AUBES5347	3242	218.165	9	15.169	TAACAAATGAATGGGCGAAC	GATCCCTGGGGAGAAACACT	083A1E10
AUBES5346	3233	182.65	5	19.87	CATATTTGGCGATGTTTCCA	TGGGAAATTCCTCCTCTCCT	103A2A09
AUBES5345	3231	184.341	18	18.711	GCAGTGAGCTGATGAGGATTC	TGCGCATTAAAATTTGCAG	074A1F10
AUBES5344	3228	270.592	1	48.348	GCTCCAGCAAGAGACTGTCC	GCTCAGGTCGCTCATACGAT	019A2B12
AUBES5343	3221	143.752	9	8.536	GTGCATCTCAGGACAACGAA	CGTTCAAAAGGATTGTGCAG	074B1G04
AUBES5342	3216	160.664	6	41.295	ACGGCCGGCTTTAATCTAAT	GACATCGTAGCGCACAACAG	039B2F12
AUBES5339	3211	272.283	14	65.876	AAGCCTTTTGTTCTGTTCCA	GAATGCTATTGCCAGCAGGT	065A2G12
AUBES5338	3202	265.518	19	22.553	GCCGACACGAGAATTAATGA	ACCCACCCGAGTTTGATTCT	080B1F04
AUBES5336	3198	412.653	3	73.907	TCTGGGAAATTGCACAGGAT	AATAGCTGCAGGGGAAAATG	090A2B05
AUBES5334	3178	177.576	18	69.198	CCTTTCCTGCACTCCAGACT	TGCAGGCTGAAAGAAACACA	042B1A05
AUBES5333	3122	216.474	18	19.229	CCAGACAGTTCTATGGGCTACC	TGATTTGGGGTGGTAGCTTG	108A2D02
AUBES5332	3096	197.87	2	72.497	GCGTCCTTGAATGACCAGTT	GTCACGTACGAGGAACGATG	061A2D09
AUBES5331	3076	213.091	3	37.149	TCCATGTCATATCGTCCACCT	TCAAGCTCACTCCAACATGC	038A2D11
AUBES5330	3027	345.005	8	44.465	TGAGAGCCCAGGTAGTCCAT	AGCTCAGACAAGCCAAGAGC	006A1C06
AUBES5329	3010	380.52	13	67.963	GCACCAGACAGATGTCCTCA	GAAATGTCACTGGTGCTGCT	051B2H03
AUBES5328	2982	228.312	8	20.595	AGCTTATTTGTAGGTGGTAATAGTAGG	CGAGCATAACTGCTTTGCTACA	010B2B01
AUBES5327	2928	208.018	1	50.184	CGACTTTCGGCCAATAAAAC	CAGGTAAGGCCCAGTGAGTT	014A2D09
AUBES5326	2901	238.459	19	41.008	CGTTGGTCCGTATTGTGGTA	GCTCACCCAACGTCATTAAA	006A1B10
AUBES5325	2885	361.917	14	55.483	CATGTGTGGCACTGCATCTT	AACATTCTCCTCGGCTGTGT	101A1H11
AUBES5324	2871	316.254	14	56.415	CCTGCACCGGTACCTTCTTA	CGGCTTGTAGTTTGTTTGATG	104A1D08
AUBES5323	2849	412.653	13	11.69	ATTCTTGGAACTCCCCTGGA	TGGACGGATTACACGGTCTT	065A2F08
AUBES5320	2772	258.754	20	45.54	CTCAACCCCACTGAACACCT	GCCAGAATGAAAGGAGGAAC	081B2D02
AUBES5319	2766	287.504	10	76.781	CCTACCTCAAGGCACAAGGA	TTGCAGCAAAGGACAGACAC	080B2D11
AUBES5317	2745	199.562	1	38.787	TGCTTTCTGTACCGGTTTCAC	GTATGAGTTTCGGGCTTGCT	038A1H12
AUBES5316	2743	160.664	20	55.418	TCCCTCACAGCAAAAAGACA	CAAGTGTGCAATGCTTTCCT	030B2D10
AUBES5314	2739	270.592	18	9.748	CGGAAGTCGGTTTTCCAAAT	AAACTCAGCAAGTTGCATCG	053B1D12
AUBES5311	2735	295.96	10	59.027	ATTGAAAGGCAGTGCAGGAG	CGTCAAATAGTACTGAAGCAAAGC	060B2C05
AUBES5310	2728	172.502	15	29.416	CACGCCAGCTCTCACTACAG	GTGGACCTGGGAATAACAGC	105A2C07
AUBES5309	2721	106.546	10	76.149	GGTTTGCAGTATTCAGGTGTGA	TTGCATTTGACTGCTGATGTC	060B1C06
AUBES5307	2700	312.872	21	10.446	GAAGAAAAATCCAAATGGGAAA	CATTTTGTGGCAAAAGTTTCA	074A2H04
AUBES5306	2693	121.766	8	41.427	CTGTGAGTGGAAAGTGAAGCA	TATGGGCAGTAGGTGGCACT	021B1G05
AUBES5305	2687	169.12	8	44.054	TGACCCTTCAACTGGAGGAC	CCCATGCTGGATTATTTGCT	106B1D03
AUBES5304	2680	282.43	10	69.967	CGAGGTTGTAGTCGCTCGTC	GAGTGATGAGCTCCGCCTAT	052B2E01
AUBES5302	2672	258.754	23	27.824	TGGAAGTGGCTGAATTTTACA	CCTGGACTGGTATTGGGTTC	074A2D07
AUBES5301	2671	294.269	23	26.546	TAGCGGTTAAAGGGGCAAC	TGTCATTTTTCGCAATTTTCA	027A1A10
AUBES5300	2659	231.694	2	41.307	CCGGAAGTATTTGGTTGCAG	TGAAACCGTGTGTCTGTGCT	061A1C12
AUBES5297	2650	209.709	3	74.585	GCAACCCTGTTATGCAATGA	CAGCAATTTAAGCACTGGGAAT	096B1E07
AUBES5296	2644	279.048	4	58.031	CACTCTGTTTGACCTTGTCAGG	GCAATGTGCGCTATGGATT	014A1D04
AUBES5295	2641	273.974	25	27.78	GCTGCTTGTGATGAGCTCTG	ACGTTGAGCGAAATCGTCTT	103B2B12
AUBES5294	2637	187.723	20	55.418	CTGTGGACGGGAATTTGTTT	CAATGCAAATTAATGCCTTGC	021B1E01
AUBES5291	2619	208.018	23	71.855	GACGCCTATTTTCAGGCATT	ACCGTCGTAATCGTCAGGAG	066A2E08
AUBES5290	2616	238.459	28	30.56	ACCGATTAATGCCCTTGGAT	GGATATGGCTAACATGGCTGA	106A1C11
AUBES5288	2610	194.488	20	5.628	GGCGGTGAAAAAGTATTTGC	ATGCTGGAGCGTAAACAGGT	030B1D01
AUBES5287	2606	180.958	12	23.268	GCGACCTGCCGCTTTATTAT	GAAAGCGTGCTAATGCTGCT	030B2D09
AUBES5286	2605	314.563	8	62.092	GTCGAAATCCTTCAGGCGTA	CGAATGGTGCTGCAGAGTT	090B2H06
AUBES5285	2601	263.827	23	27.341	GCTTTAGGGGTTTCCTCCAA	GGGGACTCAAGGCTCAAAGT	048B2F01
AUBES5284	2599	223.238	6	3.039	TTATGGCGTTCTGGGGATTA	GTTGAACCAGTGTGCCGTTT	079B1G03
AUBES5283	2586	275.666	21	43.631	CAACTTGGAACACGCAATACA	CCAGTAATCGGAAGCGTTTG	052A1C04
AUBES5281	2575	328.093	13	49.312	TAGGCATCCATCCATCCATT	TGGAAACTGTGGCCAAAAA	072B2E08
AUBES5278	2561	245.224	14	54.39	TCACAACCCAGCATTACCAA	GCTCGTGTCAACAAATTGGA	083B2G06
AUBES5277	2559	208.018	8	38.383	GCTAATCCCTCACAGGCAAG	GATTTCCAGAAAGGCTCCATC	088B1B05
AUBES5275	2555	169.12	8	15.531	CCCCCTTCACATTCACCATA	CACATCCGCTGACTCACTGT	011A2D09
AUBES5273	2543	221.547	4	17.149	CGTCGAACATGAGGACAGC	CCTTGATTTCGCTGCTGATT	083A1F07
AUBES5271	2536	221.547	18	33.505	CAATGTCGTGAAGACCATGC	CACAGTTATGGCGTGAATACAGA	080B2E10
AUBES5268	2525	160.664	8	44.539	GCACAACATGCACTTCCAGT	AGCCGGTGGTGTGTGAAT	027B1B07
AUBES5267	2524	231.694	4	65.271	GGCGTTACAGTTCCGAGACA	TCGGTCTCCCCCTTACTTCT	003A1F11
AUBES5266	2521	196.179	4	35.484	CTCGGCAAGTGACATGGAT	TGTCAAGCTTTACTGAGCATCTG	006A1D06
AUBES5265	2515	370.373	15	40.033	GCATTATTTGTGCGAACGTG	CGGTAAAAATGCCAGGTGAT	102B1A01
AUBES5259	2489	140.37	3	74.48	AATACGATGGTGATATTCAAACG	CAGAACAGCCTTTCACATCG	010A1G02
AUBES5258	2486	191.106	11	45.932	CAGACATAAATGCTTCGAGTGC	TTGCTGGATTTCCTCTTCACT	003A2C08
AUBES5257	2483	187.723	9	10.806	TCTTCTGCTATGGTGGAACTGA	TTGTCAGAGGAACCAGCTCA	096A1G02
AUBES5255	2471	169.12	11	44.633	GATCCAGTGACCCAGTGAGAG	CCTGTTGCGTATAGCAGTTCA	082B1F09
AUBES5254	2455	209.709	25	60.561	AGCCACCCTCCTGTATAGCC	GCGAGAGTGAGAACGAGTGA	108A1C07
AUBES5253	2445	140.37	20	55.558	AACTGCGCTACAGGACTCGT	TCGCGAGGAGACAGAAGTG	086B1F04
AUBES5252	2440	187.723	8	50.739	TGTCCATTTTCCCCCTCTATT	CCAAATTCCCTCTTTGCGTA	047B2A06
AUBES5251	2435	204.635	18	0.587	GTGAGGGTTTGTGTGCGTTA	GCGCGCTACATTTACTTCCT	063A2C09
AUBES5250	2428	169.12	20	55.558	GGACACATTTGTGCAATGCT	CAGGGAAATGTGGCACTCTTA	036A2C04
AUBES5248	2425	182.65	25	63.57	AAGCCACAGACTGGAAAGCA	TGAGCTCAGGATGGGAGAAT	034A2B01
AUBES5245	2416	221.547	9	8.536	TGAGCAAAGAAGGCTGTGAA	GGTAGCTGGCATGGCATT	044B2H09
AUBES5244	2411	219.856	29	7.153	TGCGGTAGCACTGTAGATCG	GCAGGTACCGCTGTAACGAG	079A1E04
AUBES5243	2400	290.886	16	12.899	AGTTTTCGGTGTATCGCTTG	AGGCATGTGGCTCCAATTA	057A2D04
AUBES5242	2398	150.517	18	33.505	ACATGCCAGGTTGGTTTGTC	TGGGAAGTTTTCCTGCATTC	043A1G05
AUBES5241	2393	187.723	2	46.906	CAAACCGGAAGTTCTGGAAA	GCACTTCCAGGCAAGACACT	080B2E08
AUBES5240	2391	431.256	13	92.082	GCCATTTCCTCCTCATCGT	TTGGTGTGTTTTTGGCTTCA	107B1A03
AUBES5239	2390	214.782	22	6.166	ACCAAACAACGATGCTGAAT	TCGGGCAAATATGAAATTGA	051B2A09
AUBES5238	2389	153.899	23	37.443	TTGTGATGAGTTGCATGACG	GCAGGTTTTCCCCTTTACCT	108A2H12
AUBES5235	2376	461.698	6	39.403	CAAGCACGTGTCCACAAACT	GCTGAAATTGGTGAAACTGACA	109B1B05
AUBES5234	2374	121.766	4	37.13	CCCCCATCCTCATACTGATT	CACACTGCTACCATTCATCTCA	051A2G06
AUBES5233	2367	280.739	17	5.291	GGGTCGGTTAAAACACAGGTT	AAACAGCCTATAGCATCCTCCA	070A2E10
AUBES5232	2363	191.106	3	74.48	GCTTCGGTACAAATGCATGA	GCACAGTAACTGGACAATTGGA	045A1H04
AUBES5231	2359	336.549	8	79.454	GACATGTATCTGCCGATTTCAA	TAATGCCTGCATGGTTTTCA	084B2G10
AUBES5230	2354	230.003	25	74.112	GGGTGTGGAACCAAATCAGT	ACACACGCAAACGAAACATT	102B1H02
AUBES5229	2353	280.739	3	65.521	GGATTTCATCCATTCCAGCA	CTGGGAAAGTTCAAGGGTCA	109B2F09
AUBES5227	2331	192.797	9	1.512	GGGGCTGTTTGGTTAGTTTG	CTTTCCCGTGTCATTCCACT	107A2G11
AUBES5225	2324	209.709	27	63.401	CAGGGAACTCCCAGCAGTAA	AAAGGTTTGTCCTTCGCTTG	073B2A03
AUBES5224	2318	248.606	10	76.599	GGTGAAAGTCAAACACGTACAAA	ACTGGAGGGTTGATCCACAA	109B1B04
AUBES5223	2316	177.576	15	64.137	CGATCCTCCAGGGAACTACA	GCTGTTTCCAGTTGGTACATGA	108B2B03
AUBES5222	2302	180.958	12	77.629	GGAAAAGCACAATGCTGTGA	GTCACATGGGTGAAAGGTGTT	058A1D05
AUBES5221	2284	147.134	21	10.561	GCATCATGCAGAGATTCCAC	AGGCCAGTTATTCATCAGGTT	048B2G12
AUBES5218	2269	345.005	5	52.289	TGCAGGAGTTCTTCCAGGAG	CCTTGGGCAAGACACTGAAC	109B1D08
AUBES5215	2263	218.165	15	49.413	ATGGGACATGATTGTTTGTTTG	GATGGAAGGAGACCTGGACA	038B2H05
AUBES5213	2230	243.533	28	34.274	GCTCTCTGGGTGTCTTCGAG	GGCTTTAGTAAGGAGGTGATGAA	014A2D07
AUBES5211	2215	299.342	23	34.711	TCGACAGTTCGAGTGTCCAG	TTGGCTTGTGAGATGCTGTT	048B1G11
AUBES5210	2209	240.15	16	92.378	CCATGGGGTGTACTTATTTTTCA	CCTGCAGGACCTTCATGACTA	013B1A07
AUBES5209	2206	179.267	22	68.933	CAAATTGCTGCTCATGCTGT	AATGTCCGAGACATCTGTGG	009A1E04
AUBES5207	2195	292.578	27	40.242	CCACATCGATTGGTGGTACA	CACTCCAGCTATGGCAAAGG	069B2E11
AUBES5206	2194	316.254	29	97.159	GAACCGTCCTCTGCGTATGT	CTGTTTGTGGGAATGCAGATT	054B1C04
AUBES5205	2184	196.179	28	5.046	TTCCCTTTTCCAGGTAGTGC	CTCTCAATCAAATCTGCTTCCA	078A2G04
AUBES5203	2162	213.091	4	35.373	CAGGGTTTATTGGAGCTCGT	CAGCCAATCAGAAATTCAGAAG	028B2F04
AUBES5202	2155	248.606	1	24.695	AGTTTGGAGAGACGGAGCTG	TTCCGATTTTGAGCACACAG	074A1C08
AUBES5200	2145	219.856	7	69.364	TCTTTGCCTAAGCCCTTGAC	CTGTGATTTGCCTAGCAACTGT	004B2F07
AUBES5199	2139	219.856	9	0	CTGCTCACCTGATTGCACAC	TCGTAGCGTTCAGGGAAAAA	072A2G11
AUBES5198	2135	265.518	1	27.546	CAGGATGAATATGGCGAGAG	CACCTGTACTCACCTGCCATT	076A1E10
AUBES5197	2134	272.283	8	79.055	GAACAGCTATGGGTGGAAGG	CATGGTCAGATGGTGCTGTC	104A2H04
AUBES5193	2120	199.562	4	58.031	CTTGTGTCCTTTGGCAAATTC	GCCAGGAAGGGAGAAAAACT	011A1D07
AUBES5192	2099	351.77	1	9.9	AAAGGTTTGCTCTCCCATTG	TGCACAAAGACAGACTGACACA	110A2A11
AUBES5191	2097	194.488	1	25.491	ATCGGTGGTAGTTTCCAAGC	GTGCCAGTTTGTTGCGTACA	008B2A11
AUBES5188	2062	382.211	25	42.372	CACTCGACAAAACCGTGTGT	GTTAGCCTGCGTTTCTTTGG	095A2C10
AUBES5186	2025	184.341	12	38.081	TGCCGAGTCCAGAGAAAGTT	GCGACCAGTGCCAATATGT	004B2D02
AUBES5184	2015	211.4	25	43.543	CTGTCCTGTGCACTCGTAGG	GATGGGCCATGACTCCTTAC	104B2D05
AUBES5183	2000	255.371	1	29.198	CCCATAACGACAACGTGAAA	GCGACAGTCAAAGTCTCCAG	107A2C09
AUBES5179	1985	282.43	24	16.442	CGGGACTAAAGGATTGGAAA	AGAGGGAGCTGCAAGAACAC	006B1D10
AUBES5178	1966	265.518	20	40.688	GTGTGATTGAGTGCCAGGAA	GCCCAAAGAGAAATGGCATA	095B2A08
AUBES5177	1950	351.77	4	52.758	AATTGGGCAAACAGGACAAA	TGGTGTCCTTGCTTTAGGTG	064B1D06
AUBES5176	1937	186.032	3	71.18	GTCATGCAGCTGAAGAGGAA	AACCTTCAGGCCATTTCTGA	109A1E06
AUBES5175	1932	175.885	12	83.199	GTTATCGCCCTGTTCGTGAC	CGTGTCAGGACCTCATCAAC	034B2E03
AUBES5174	1906	290.886	13	39.084	CCCGTGACTTCCTTTAATGC	TGCTCGAGTCTGCAGTCAGTA	014A2H07
AUBES5169	1882	174.194	3	42.777	TGGACGAGTCATGAATTAGGC	CAGACAGTGTCCTTCTGCTTG	012A1C09
AUBES5168	1867	301.034	3	49.383	GGGTTGCCAGATCAGAACAG	TGTGTTGGTCCATGATCGTT	012A2C03
AUBES5166	1846	280.739	25	58.856	ACCTCCATCCCAAAACACCT	GCTTTATATGGCCATGTGATCTT	006A2C11
AUBES5165	1839	180.958	1	25.683	CCTACAATTGTTGATGTGGTGAA	GTCTCTACCCACCCAATCCA	026A1C04
AUBES5160	1804	268.901	12	74.283	TGGAGTGGGTGTTTGTCTTG	CATGGGAAGTCAGGTGAGGT	107B2C09
AUBES5159	1796	339.931	19	54.974	ATGCATGCGTGTTTGTATGC	GATCTCTTCACGAGGCATGAG	052A1B01
AUBES5156	1752	142.061	8	127.764	CACAGGAATCACAACGTGGA	TCTCTGGACATGGTGTGGAA	014A2H10
AUBES5155	1750	372.064	8	44.563	CTGCCTTAGAGCTGGATGGA	AATGGCCAGTCCGTGTAAAG	054A1G02
AUBES5154	1746	218.165	3	8.951	ACTAAACACTGGGCCCCTTT	TGAATGCAGGAGCACAATTT	039A2C05
AUBES5151	1710	253.68	6	48.018	CATGAACCTCCACTGACGTG	CCTATGGGTCAAAGGTCAGC	060A2B06
AUBES5150	1709	253.68	14	58.391	AGTCCAGTAGGTGGCGGTAA	GGAAAGCTGCGTCATTCCTA	040A2D03
AUBES5149	1707	235.077	7	70.824	TTTGTGCAAAATGAAACTTGCT	CTGAGATCTGGGGAATTTGG	024B1E03
AUBES5148	1705	456.624	3	64.824	TCCTAGTGCCAGGCTCCTAA	GTGGTCAATCACCCACCTG	088B1D05
AUBES5146	1690	187.723	2	40.142	GCACGCTTTTAGTCTGCAAAT	TGAACTCGCACCACACATCT	030B1D11
AUBES5145	1689	233.386	16	80.16	TCATGGATGCAAAGGCAATA	GCAGCGTCACTTAAGCTCGT	106B2H02
AUBES5144	1687	197.87	7	68.722	GCAGGCTTGTGAGGTTAGTGT	CAGGATTAACCATGATACCAGGA	100B2H04
AUBES5141	1681	226.621	11	44.172	CAGGCTCCCTGCAATAAGTG	GCATCCATCCATCCAATCAT	083B1B09
AUBES5136	1649	409.27	18	45.928	GGTACTGGGTTCACTGGCTTT	TTACGCAGCCAATACTTACCC	107B1C02
AUBES5135	1644	275.666	17	5.29	GAGTGCCTTCAGGTTGCCTA	AACATTTCCCACTGGAGCAC	071B1F09
AUBES5134	1640	251.989	4	59.54	CGACTCACGCACCCTAAGA	GACCCACTATCTGCAGGGATAC	055A1E03
AUBES5130	1623	339.931	12	52.919	TAAACCGTTGTTCCCTCACC	CATGGATCCTCCTGCCTCTA	088A1C05
AUBES5129	1622	214.782	23	23.45	ACATGCGGATGTGCAAGTAA	GGCATCTCTGCTGGATACCT	042A1C01
AUBES5124	1601	282.43	3	8.951	GTTTGTGGTGCCATGTCAGA	TGAGGATGACTTTGAGCCTTT	080A2D03
AUBES5120	1561	265.518	1	25.7	GCAGGATGAGGCTCAGTGTT	GACATTGTGGGTGTACTTATATACCTT	036B1B08
AUBES5119	1560	248.606	1	33.642	GCTGTTAACGTTAGAATTTGATTTT	TCATCTTCGTGTGCTGCTTC	005B1A12
AUBES5118	1550	265.518	25	59.874	TGGACTTTGGAAATGAAGAGAAA	CACCGATTTTGAAGGTTTGAG	096A2E12
AUBES5117	1540	251.989	7	45.075	AAAGAAGGTTGCTCCTGCAC	GTAATGTGTGGCGCGTATGT	042B1D08
AUBES5116	1539	197.87	12	47.075	TGCACTTTGCACATATCAGG	CACCAACCCATCATGGAATA	026B1A09
AUBES5115	1537	160.664	16	65.679	CTGAGTTTGCTGGATTTTGG	TGTGAATGGACCTTCTTGGA	078A2D07
AUBES5114	1531	537.802	7	68.949	TTGAAGCTTGAAATTAGTCAAAAGAA	GCATGTTTCCAGGGAGAAAAA	006A1D01
AUBES5091	1517	546.258	23	3.703	GAACTCACGCTGCTCCACTT	CGTCCGTTCACGTAAAGCTC	073A1E04
AUBES5090	1515	169.12	8	44.427	CGTAGCGAAAGTGGTCACATC	TGGAAACTGAGGGTGCTTGT	107A1F05
AUBES5089	1505	245.224	5	43.418	GCGAGAGAGTGTGTGCATGT	AGCTGGTGAATCGTGTGTTG	072A2G07
AUBES5088	1503	165.738	29	58.122	GGCATTTCATTGAGGCAAA	CAGTGGTGCTTTTGGAGTGA	106B1E04
AUBES5087	1493	304.416	13	49.813	TTTCTTGCCACTGTCACCAC	CCTGACCATCACACCCTTATG	050A1H07
AUBES5086	1488	201.253	21	15.446	TAACAGCAGCTTTGACAGCA	CCAACAAAAGTCGACCAAAGT	028A1H09
AUBES5085	1476	206.326	7	49.643	TGGCACCCTTGGTAAGTATG	CACCACATTTCAGGTGGAACT	111A1B08
AUBES5084	1470	196.179	23	25.153	CAGCTCTGACAACAGCATGAG	TCAGGTGTATTTGCCCTTGAT	002B2F12
AUBES5083	1453	282.43	17	5.273	CACTGTTCACCCACAGCAAC	GCAAACTGGATGTCTTTGAGAA	032B1B01
AUBES5082	1452	338.24	17	5.291	CTGGCTAAAATGCATGGTGA	AGCAGGTCTGATTCGCAACT	031B2C01
AUBES5080	1448	289.195	2	6.658	CAATAATGCGATGGATGGAT	CGCAGACGTTCTGTGACATT	012B1G04
AUBES5078	1433	295.96	9	25.795	ACCGTGCAACAATACAATGC	TGTATGATCTGCGTGCTGTG	001B1G10
AUBES5076	1426	184.341	5	46.451	TTTGAAATGCAGCTGGTTAAA	CCAAAGAAGCCGTGATGTTT	007A2B05
AUBES5069	1404	233.386	21	22.819	AAAGGCATTAGAGCCTGGAT	GCCGAAAAGCGACTAGTTTG	106A1D07
AUBES5067	1393	287.504	3	79.809	CGCAGAATAAAATGCGCTCT	ACTTCTAGGAACGCGCACAC	035A2D12
AUBES5065	1382	192.797	23	25.6	CGGAAATCCATTGTTTTCTTTC	GGAGCTCCAGATTGAATGATG	073B1D02
AUBES5063	1375	240.15	24	17.983	GTCAAGCCAGGCCACATTAC	GCAAACTGTCAGCCAGTCAT	073A2A06
AUBES5061	1368	334.858	1	27.246	TTCAGGGCACAGCTTAATTG	CAACCCATGGATATGCTCCT	108A1H04
AUBES5060	1366	361.917	27	1.562	CACGTTGGCCTTATGACCTT	GCTGCGATATTTAAAGGTGTTTCT	073B2C01
AUBES5058	1358	365.299	13	61.3	GCCCAATATGTTTCGACCAA	CGAGCTCTCTTCTGAGTCGTC	053A2F12
AUBES5057	1352	240.15	1	26.532	CTCCAAATGCACATTGCTGA	CAGTTATTAATTAGTTTGGCGTGTG	014A1F03
AUBES5056	1346	265.518	10	55.937	CAAGAACCAGTTGGGTGTCA	CACGTTTACACTGTGGCTGAA	045A2B08
AUBES5055	1337	339.931	9	10.858	GCGTCTCGTGGAGTTCACTT	GCGAGACTGCCGATACAAAC	050B2G09
AUBES5054	1336	353.461	12	31.466	TCGCGGTCCTCTCTTATTCT	ATCCCTCCAGACTCGCACTA	034B1D07
AUBES5053	1335	196.179	27	40.613	TGGCACGCTTGATGCTATAA	AAGGACGGGCTGAGATGAAT	098B1E11
AUBES5052	1334	356.843	26	34.986	GCCCCAGGGTGATACAGTAA	GCACGGACAGCACCATCTA	085A2C02
AUBES5050	1329	196.179	10	44.074	GCCAGCAAAAATGGATCTACA	CCAGAGATCGCACTTCCATTA	071B1G07
AUBES5048	1326	272.283	3	48.535	ATCACCACCGTCTGACCAAT	CCTGTTGAGGAGAGCCAATG	087A1A04
AUBES5047	1313	329.784	20	83.506	AACGTGCACTTTTGGTGTATTT	GGTCACGAGTAGCAGGGTTG	045A2H11
AUBES5046	1311	353.461	2	63.862	CAGAACTCAACAGCAGTGTGG	GATCGTCCAATTCAGCATCA	086B1D08
AUBES5044	1296	194.488	2	40.943	TGGCACGAGTGTGGTTTCTA	TGCCAGAATGAACACTTCAACT	053A2F10
AUBES5041	1277	235.077	11	44.633	TGGGCACTTTAGGAAGATAAGG	CCAGTGGCCACAGAGGTAAT	024B2H11
AUBES5040	1271	245.224	7	68.013	CTGCGCTTTCATCTTCTCTG	ACGTTTCAGTCGAGTGTCCA	059B1E02
AUBES5039	1269	480.301	5	58.979	TATGCTTGCCTGCATCTTTG	GCACAACATGTCTTTCTTGGA	070A1C06
AUBES5038	1268	230.003	15	31.947	TAACCAGGGTCAGAGCAAGG	TCGTCTCAGCTGCAAAAACT	080A1H12
AUBES5037	1266	419.418	14	48.877	CACACAATTTTGCCCTGTGT	CTGGGAGTGGACAGAACTGG	079A1H01
AUBES5036	1265	202.944	8	38.477	GGCGCAGTCACAAAGATGTA	GCGAGATGCTGATGGTACTG	013B1C07
AUBES5035	1247	241.842	17	5.272	CACGGCAGACACTCAAAGAG	GCGGTTTACCTCGGCTTTA	062A1H05
AUBES5034	1241	221.547	14	54.944	CTGCCACATGGTCTGTCTTC	CTCAGTGAGTCCCTCGCTTT	102A2C10
AUBES5033	1239	282.43	28	15.438	CGACGTGTTTCCTGTTTAATGA	GGAGGACGTTAGCGTGAAAA	110A2A09
AUBES5031	1230	319.637	22	66.641	CAGCTACTGGAGGGTTGCAC	GGCTTGGTGTACTTCAGTGGA	007B2H11
AUBES5030	1226	209.709	20	56.262	TCCATACAGCTGGCATGTTC	CGGATGTAAACAGCAGTGGA	075B1D11
AUBES5025	1212	282.43	27	73.154	CCAGCAGATTCTGGGAGATT	TGCCACTGGAAATTATGGAA	053B1G08
AUBES5024	1204	284.122	25	57.792	CATGCAAGACCTGTGGTGAG	GGCACGTGATGCATTTTTCT	020A1B02
AUBES5022	1199	199.562	16	79.528	GAGTGCATTACTTTGAACCTTGC	CACAAACTGCCAGCAATACAG	051B2E09
AUBES5021	1198	223.238	19	76.117	CATGTCGGATGAGCTTCCTT	GCAACCTAGCCTTGAGATGA	004A1C04
AUBES5019	1187	267.21	11	45.168	TGTCCAAAACTTCACCAGCA	TTCTCTGTGCAACCCTCAGA	012B1D05
AUBES5018	1181	324.71	18	39.54	TTCGGCATATCTTTTCACCA	GCAAAGTTGTAAACTGAACAAACC	087A2A04
AUBES5016	1174	260.445	10	76.149	TTTGTCAGTGGGCAAACGTA	TGTTTCACGGACATTTCCAA	063B2D09
AUBES5015	1171	295.96	13	84.647	CGATAGGAGCTTGCTGTTGA	CTCCACCTCCCGAAAACAT	075A2F08
AUBES5013	1151	441.403	21	1.655	TCTTGCATGTGTTTGGGTTT	GCAGGACAGTGCAAAACAAC	090B2E04
AUBES5012	1149	290.886	21	23.076	TCTGCAAAAATTGCTTGTGA	GTGAGTGGAGCGAAGGTCTC	061A1A05
AUBES5011	1138	243.533	12	38.403	ACTCATTTCCGTCTGGCTTG	TGATGCCGCAGTCACAAC	048B1C06
AUBES5010	1134	228.312	20	34.202	CACCATGGAGTTTCTTGGAGA	TTGGAGTGTGTTGCTCAAGG	095B2E10
AUBES5009	1130	360.226	23	26.351	TGCTTGAGTGGGCACTATGA	CCGCACCAAACTAACAAACC	104B2C05
AUBES5008	1129	400.814	24	14.954	GGAAAATCCTCCGCTTATTCA	CAAATCCGACCATGACACTG	107B2A03
AUBES5007	1126	331.475	12	88.941	CTGGGAATTGTGATGTTCCA	TGTGAGGCGTTTCATTTTGA	052B2A03
AUBES5006	1114	287.504	8	44.427	TCCACAGCATTGAGGTGTGT	AGGGTTCAGCAGCAGTTCAT	058A2E02
AUBES5004	1096	211.4	20	39.516	CAGTCCATGCACGTTACGAA	ACCAGGTGGCAACAAATACA	024A1E01
AUBES5003	1095	255.371	24	50.554	CGAGCGAGGGATGTACTTGT	CAGCACGTCCCGAAGTTTAT	006A2C03
AUBES5001	1082	336.549	2	42.735	TCCTCACGCTTGCCTATTTT	CCAGTTTTCAAACAGTCAGTCC	072A2D11
AUBES5000	1078	387.285	27	86.462	GATCAGCTGGTGGAACGAAC	GCGAAGAGGTCCTGAGTTTG	056A1E11
AUBES4997	1060	214.782	21	34.941	GGTTGAGGGCTGTTTCCTG	ACCGCTGAGAGGAGTGAGAG	035A2C09
AUBES4995	1048	272.283	24	14.886	CCCTGATGGAAGGATCTGTT	TGTGAGCATTGTGACCCATT	034B1G06
AUBES4993	1020	356.843	6	6.513	CATCTGTGCAGTCTGATGGAA	CCGTACGCTACATCCACCTT	053B1E03
AUBES4992	1011	345.005	1	25.472	GGCAACAATGTTTGATTTGC	CCAGGCAAGACTGGAGTAGC	050A1E07
AUBES4991	1003	263.827	5	34.573	TGTGGCATGATTAACGTTCTG	CCCTATGTCACTGTGCAACC	082A2G03
AUBES4990	1000	192.797	25	55.191	GGACCGTTTCTCTTGAGTTGA	GAATCGGCTTTACCATTCCA	004A2G06
AUBES4986	991	226.621	9	7.975	AATCGGTCAGATGTGGAGGA	TGCCTGTCTGTATCTGTCTGTG	020A2F07
AUBES4984	979	348.387	26	18.421	GCCTGGCCTTCTTAATTTCG	GGGAACTTTCCCTCACTGCT	054A1B12
AUBES4983	971	338.24	13	0	CCGGTTCCTTCAGTTCTTTTC	GCCCGTTTCAAGTTTCTTCA	022A1B03
AUBES4982	944	438.021	14	70.22	CGCATCAACTTTCAGGACAA	GCACACTTCTGGTTGCATTT	073A1D11
AUBES4976	889	475.227	3	80.842	GTCGTTCGTGCACTTGTCTG	TCAGTCGCAGTCTGTCATCC	101A1H05
AUBES4974	882	316.254	3	79.803	AACGGAGTTGCATTATGCTG	GATGTGCACCCTTATCGTCA	072A1A04
AUBES4973	881	270.592	9	9.044	GCTTAACTGTCAGTGGCATTC	CCTTTGGTTCTGGTAAGGTTG	079B1B03
AUBES4972	877	311.181	4	58.031	TCTGTTAATGTCTCCAAGACCAAA	CACAATGTGAGGCATCATTTACA	011B2H03
AUBES4971	863	265.518	4	59.552	TTTAGGGAAGGCCCACCTAT	GTGCTGGATCACTTCCTGGT	067B2F02
AUBES4970	859	326.402	3	74.886	GCATCTGACCGAACAACAAC	TATAGGAATGCCCACCTGGA	080A1H02
AUBES4969	856	348.387	17	4.646	AATGGGGCTGTTATTCCAGA	TGCTCTTTGGGAATCCTCAC	062A2C09
AUBES4966	832	339.931	27	40.348	CAAACAGGAGCAATGGAAGG	TACTCATGGCCACACAGCAC	109A2A07
AUBES4965	824	251.989	16	105.864	GTGTTCAAACCCCTGCTCAT	ATTGTGTCCTGCTGCTCAAT	004B2H03
AUBES4963	807	267.21	6	40.83	CCGGTCTAAAATATTTAATGGTGA	GGCTGTTTTAAGGAAAAATTCAGA	042B1B04
AUBES4956	729	316.254	10	66.72	GATGGACTGGCACCCTGT	GGCCACTCCACATAAACCAA	112A1E05
AUBES4954	694	224.93	16	87.305	CCCTGCTATTCCGCAGTCTA	ATGTTTCGATTAATGAGATGAGG	102A1A11
AUBES4951	687	355.152	25	65.174	CGTCCATCTTTCCAGTGTTC	CGTCAGTCACGAAGATCGAC	024B2F06
AUBES4950	683	199.562	3	64.828	TGACATTTATTCCCCCACTGA	TTCCAAACAACCAAGAGGAAA	076B1D08
AUBES4949	669	309.49	12	38.091	TCGCAATGGCGCATATATTA	TCAGCGTCTGGTGGAAGTAA	004B2A09
AUBES4948	662	277.357	16	75.342	CATATCCCAGCCCTCAGTGT	CACTCCACTTCTGCAGCCTA	053A2B07
AUBES4947	659	238.459	19	44.723	TTCACTGCAGACATCGCTCT	ATGATCTGTCAGCCGTCCTC	109A1D02
AUBES4946	656	285.813	28	0.044	CGGTGGTTAAAGGTGACGAT	AAGGGAGCAGTTTTGTGGATT	071A2A11
AUBES4944	638	270.592	27	29.584	GCATGCTTCTGTCATCTAGCA	GGTGTTGGATAACCTTTCTTGC	064B2H05
AUBES4943	636	377.138	1	22.783	GATGAAGCAATGCTGCTTGT	GTCCTGGCCTGGTACAACAT	049B1B01
AUBES4942	613	260.445	19	62.526	CGGATTGCACAATTCATCAG	GCGCTTGTAATCCAGACGA	043A1C05
AUBES4939	598	444.786	4	58.033	CAAGAGTCAACCAAATGAATGAA	GGATCTGCCCAGACATCATC	098B1A10
AUBES4938	587	380.52	5	62.032	TTGACGTGTCCAAAGTGTCC	TGGCTGTGTCTATGGTGTCAA	085A1A07
AUBES4936	578	346.696	4	28.647	CAGACGTTTGGACCCCACTA	CGCGCTACATCACCAAGATT	111B1C01
AUBES4934	575	470.154	26	48.791	CCCGTTTGCAAGATGTCTTTA	GCCCTAACAATTTGGTCTGC	073A1E05
AUBES4933	573	355.152	18	9.629	TGTAAATGAGCAACGCTGGTA	AGCCCAATATGCTGCTTTGT	063B2A09
AUBES4931	567	314.563	15	32.134	CCACTGCCCTCACTAGCAG	TGAGGTTCACGTGCTGATTC	095A2E09
AUBES4930	558	285.813	22	64.451	ATGGCGTAACACTCTGAACTCAT	CTTGCATCCTTTGCAGTCAA	053A1F01
AUBES4929	527	309.49	5	46.354	GACCCGTACTGAATTGAATGG	AGAAATGGAGCGAGCACTGT	028B2D05
AUBES4928	524	336.549	12	47.075	TGCCAAAGGTATGCTCCCTA	CACCAGTAAATGCACCCAAT	025B2G06
AUBES4926	507	279.048	25	44.973	CCTGCTGCCTTAACCAATGT	ACAGGCGGAGAACGTACAAC	102B1E10
AUBES4924	457	343.314	10	65.88	GGACAATTAAACGCAAAATGC	GTTCCGATACGTGCAGCAG	012A1H04
AUBES4923	440	488.757	8	44.539	CAGTGGAGGGCTACAGGAAA	TTGATCGATACTCCACCATCC	086B1H11
AUBES4921	432	324.71	25	66.922	ACGTGGCTAGCAACTCGTTT	TGCCGTTTATTTGTGTACGG	042A2C03
AUBES4919	422	202.944	12	45.881	GGAAGCTTTTGGTTGCAGTT	CAGCATTCGGTTATCGGTACT	108B1G04
AUBES4918	417	316.254	13	53.951	TCAATCACTCTCTTGATCCTTTCA	GCCAATGTAAAGTTGGCATGT	051B1F11
AUBES4917	415	282.43	24	14.954	CACTACGAGGGCAGGGACT	GACGAACAGCATTGTGGGTA	014B1B07
AUBES4914	353	307.798	27	25.545	CCATGTTGAATATCCACCAAGTTA	ATGCAGTGCTCGCTATGCTA	048B2C04
AUBES4913	334	228.312	12	40.016	TATGTGACTGCCGGTGGTAG	CTGTTCCCCTTTGCAGAAAC	083B2G11
AUBES4912	309	311.181	18	33.431	GGGGTTGTACTTTGTTTTGACC	CCCTTGTTTCTCTTGATTGGA	012B1G05
AUBES4910	299	228.312	16	73.349	CATGGACAGTGCACAAAACC	AGCCACAACTCGTTCCAAAT	069A1G11
AUBES4909	289	385.594	17	6.718	CCCCAAAGCCATAGGACTAC	GGCAATTGATTTGCTGCATT	083A1B10
AUBES4907	257	502.286	13	49.661	ACAGCTTTCATGGGCTGAAT	TGTGTTCACACCCATTTCTGA	068B2F08
AUBES4906	238	243.533	4	58.462	ATCATGGCCATTCCAAAAGA	CGAATGAATTGTCCTTGCTG	107A2A04
AUBES4905	235	240.15	16	76.238	GACAAACACTTCCTGCTATCAGTT	TAAAATTCGGCCTTGGGTCT	109B1A08
AUBES4904	234	301.034	4	37.713	CTCATCCGCGCAGAAATTA	GCACACATATTCAAAGCGTGA	060B1C02
AUBES4901	115	243.533	28	74.578	GGGGAGGAAACTGGAGTACC	TCTGTAGTGGGTTTTCAGCAA	001A2A05
AUBES4900	90	273.974	23	18.903	TAGCGTTCGTTTATGCGATG	TGATCGAGACATAAGGGGTGA	051B1G04
AUBES4897	54	363.608	5	46.355	GCATGACTGTGCTGGCTAGA	CAGGTGGTTAGTGGCAGGTT	035B1D06
AUBES4896	24	304.416	17	5.291	CGGTTGCAACACACTCAAAG	CCAGCCCACTAGACAAGCAT	096A1C04
AUBES4894	22	290.886	28	65.95	CTGGATAAGTTGTGTCCCTTGA	CACTTTTTCCGAAATCACAGC	008A1F11
AUBES4891	951	209.709	28	35.963	ACCCTGCACTGCTCTCTGTC	TGCAGGCGGATTGTCTTAG	108A2A11
AUBES4890	951	209.709	28	35.822	GTACCCCAGGTGTGTTTGCT	CTCAGGAGTTTTCCTCCACTG	020A2E12
AUBES4888	897	273.974	12	47.075	GAGAGGGACATCCGGTCTCT	GCGCATAGATTTCCAGTTGC	054A1H05
AUBES4887	897	273.974	12	47.075	TTGAGTGCGAGTGTGAATGAG	CCGTGGGGATTTACAGATCA	005A1D11
AUBES4885	741	277.357	13	18.467	AGTGGGTGGTGCAAAAGTTC	TTTGGTGGAAGAGTTTGTGG	043A1E08
AUBES4884	688	265.518	17	6.302	CCCATGCACATCAGAACAAC	GACCGAGCATGAGTGCTTGT	039A1C05
AUBES4883	685	214.782	16	73.535	GCAGGGTGATCACAGATGAA	TTGAAAATCTGTGTAGGCATGG	064B2C11
AUBES4881	647	265.518	4	58.608	GAGCGTGGAACCTACCTTGT	CTGCGTCAGGACACCGATA	057A2G02
AUBES4877	399	248.606	26	32.692	GTTTGTGAGGGTCCTCATGC	AAAATCCCACACGTCAGGAG	052A1C01
AUBES4876	2932	328.093	3	74.556	TCTGGCCCTTTGACATCTTC	TACCCGCATTCTCATGTCTG	051B2G06
AUBES4875	2932	328.093	3	75.219	CGTAAGATAACCAGTGAATGTGATG	AGCTCCTTCCTTGTGTGTCC	001B2A11
AUBES4872	2508	375.446	14	51.831	GCCCAGATTAATTCACATCACA	TTGGAACTCCGCAAATTAGG	096A2B05
AUBES4871	2508	375.446	14	52.297	AGAATGCATGTCCACACACC	TCGTTGCCATTGTATTCACAG	052A2E04
AUBES4869	2233	400.814	4	58.206	GGTGGATTCATTGGGTTTGA	GGGGACAGCAAATTTACACTG	023A1C07
AUBES4868	2185	270.592	5	29.781	GTTCATCTGCCGCGACTATT	CCCCTCAGAGAAAGAGAGAGC	070A1E04
AUBES4866	2174	262.136	29	7.56	CATCGCTGCCTATGGTGTC	TGCATTACGTTTCCAAACCA	109A1A04
AUBES4865	2094	373.755	24	18.771	ATCCTTCTGCAGCTCGACTC	GAGTACCGGCTTCTGAGTGC	052A1A02
AUBES4864	2094	373.755	24	22.299	TCAGCGTCAAGAGACCAACA	CATAGTGGCGCAATCAACAC	013B2F04
AUBES4863	1984	419.418	19	42.377	TATTGAAACACGGTGCAGGA	GATTCAGACTCCGGACCAAG	049B2A05
AUBES4861	1940	230.003	1	25.683	GGGACTCCCATCAGAAACAA	TGCCTGTTGTTCAATCTCAA	087A1D01
AUBES4860	1940	230.003	1	25.673	CTTGTTGTGAGTGGGTGTGC	TGCATTACCCTGTGTTTATGTT	030A1A10
AUBES4859	1930	429.565	2	71.127	CAGCACGCAGAATCCTGTTA	GTGCGATCAGTCGAGGATTAC	084A2A07
AUBES4858	1930	429.565	2	70.16	CTGTCGATGATGTCCTCGTG	GCTGCAGTCCCTCACTACATC	108A2C12
AUBES4857	1873	382.211	20	63.767	TCTCCCGCTATATGGTAGGC	GCATCAGCCCTGAGAACACT	109B2H08
AUBES4856	1841	245.224	18	39.943	CGTGTTAGGCTTTCTGAATGG	TGGATCTCATGACAGTTGGAG	018B1C04
AUBES4854	1761	265.518	22	63.175	CACACACACACACCCAAACA	CCTGCAGGTCTCTGTCACTC	048B2A07
AUBES4853	1761	265.518	17	4.633	CCCACAAAAACACACACACAC	AATCTGTCCGTCTGTGATCG	011B2E06
AUBES4851	1749	348.387	1	16.765	AATCATTGAGCTGGCAAAGC	TGTCTGCACTGTTTTTCATGC	084B2H08
AUBES4850	1748	591.92	10	67.712	CACAAAAGGGCAGACAACAG	TTAGTTCCTGGTGGCAAACT	035B2F04
AUBES4848	1719	419.418	15	40.898	GTTGGCATTGTACACGTTCG	CTTCGACGGTGAGGACTTTC	009A2E07
AUBES4845	1642	316.254	22	66.147	GAGAGACCGAGAGACCGAGA	AGTTCTGCATGCACACATTTC	106B1E07
AUBES4844	1642	316.254	22	66.146	GACTCATTGTGGCCCAACTC	AGTAATGCAGGCCAATCAGC	059B1C06
AUBES4843	1619	350.078	12	53.279	ACATAGCCTGCCTCTTCACC	TCCAAAAATGCCTTTTGTCTG	075B1E02
AUBES4842	1613	324.71	5	16.439	GTCAGACGGTGTCGGTTAGC	CGTCTCCTTACAGAAAACTTCACC	074A2E04
AUBES4840	1554	353.461	9	19.272	GGCGAGGATTAATCGTGATG	ATCTTTTGAGGCCAAACAGC	027B1A02
AUBES4839	1552	251.989	12	87.176	AGGCTAAATTCGAGCCAACA	ACAGGAACAATGCACCATCC	083A2F06
AUBES4838	1552	251.989	12	94.52	ATTCGAGCCAACAAGACCTG	GGTCAGCGGACAAACAAGT	003A2C05
AUBES4837	1536	439.712	26	19.168	CACATGCAAACACACACTGG	CCCTGCTCTCAGGAATTCAG	003B1H01
AUBES4836	1536	439.712	26	18.421	ACCTGGGTATGAACCACGAC	ATATTTGACGGCTGCTTGAG	112A1C11
AUBES4835	3193	131.914	16	37.095	ACTGCAAATTGCTGCGGTAT	ATTTGGGTGGTGCTTCATTC	004A2G05
AUBES4830	3185	223.238	3	72.782	AGATTTTCTCATGGGGAGCA	CATTCCTGCAATCTGCCAGT	013B1G04
AUBES4829	3181	317.946	11	48.424	CAATCGTTGCATTTATGTAGCA	CAATGGAGAAAGGGTTGGTG	073B2F11
AUBES4828	3173	169.12	10	77.45	AATAAGGCGTCTTTTTGTTTCG	CCACGTGTGACTGGCATCTA	107B2B04
AUBES4827	3171	223.238	12	19.88	GCTGAACTGATCGTTGTTTTTG	TCAAAATGCCATGTCTGACC	109B2C10
AUBES4826	3157	126.84	24	15.737	ACACAGAGCAGGGACGTTTC	TTCTCTACCGCCCAGCTTAC	082A2B06
AUBES4825	3155	219.856	26	42.213	TGACTTAAATCAACATCATGTGC	GTGGCCACCAAATTATCAGG	059B2A08
AUBES4824	3154	128.531	3	4.596	TTTCTCATTGCAGTGGATGC	CATTTTCAATGTGGTCTCAGACAT	062B1B04
AUBES4823	3148	194.488	28	64.074	TGTATTGCTCCAACCTGGAA	TCCACCCATGTTTATGAATGA	049A1A08
AUBES4820	3124	216.474	13	101.47	TCAAACGAACACAAGGATGC	TATGGCTCCTGATGTGTGGA	046A2H09
AUBES4818	3116	99.7808	16	60.942	GTCCAGGGCTCGATTATGTC	AGGAGAAAACGTATCTGCCAAT	092B1B11
AUBES4815	3100	223.238	9	31.608	ACCAAAAGGCCAGGCTAATC	CCACGATGTCGTCCTCTAGC	031B1E06
AUBES4813	3091	204.635	8	0	TGCCCCCAATGTCTGAATAC	TCTCGTCTTCCTGGTGCTCT	104A1H02
AUBES4811	3086	192.797	14	55.067	GTTGGATGAGGGTCAGCTTC	GGATCAAGCTGTGGAGCACT	001B1B11
AUBES4808	3079	245.224	16	72.428	CTGTGTGCCTGATTGTCTGC	TGTGGCATAGAGTGCTGCAT	021B1E12
AUBES4807	3078	145.443	24	66.332	CCCATTTTGCTGTAGCAGGT	AGTTCCAGTTTGTGAAAATGTGT	071B1D07
AUBES4806	3074	270.592	16	77.292	GTGTCCCCTGTTACCTGTGC	GGGTAGTGGCAGGATCAATG	092B1G12
AUBES4805	3059	160.664	26	26.424	GGTCAGTCCCTCATCGACAC	TACCCTCACACCACAAACCA	111B1A08
AUBES4804	3052	194.488	23	0.733	GCGGACATGGACACTGATG	GTGCGCGTGTATACGTGTGT	022B1A09
AUBES4803	3036	251.989	21	8.936	CAAAGAGCAAACCCCAGTGT	ACGCACATGTAGCTCCCATC	050A1D01
AUBES4802	3026	224.93	6	40.792	GCGAGAGGGAATAAATGCAG	GTTTGAGCAAAGCCTGATGG	085B1F06
AUBES4800	3020	182.65	1	25.673	AAGGAGTCTTGAGTGTCAGTGC	TGATAGGGCCTGATGGAAAG	001B2G04
AUBES4799	3014	196.179	16	18.099	CAGTACTCGTCGTTGGCATC	CGGGTGGAGAGAGATTGTGT	104A1B10
AUBES4797	2997	248.606	29	11.335	TCTTGCCTGCCCTTGTTTAC	CGTACGTTGTTTTCTCCAAGG	051B1D06
AUBES4794	2955	177.576	26	26.374	TTCGAGAGAAAGGTTTGCTGA	CAGGGACCGTAACTGGTTTG	084B1A03
AUBES4793	2942	201.253	25	71.029	TCCCACCACCATAGAGCAAT	CATCAGCACGAACGCATTA	023B2E03
AUBES4791	2929	262.136	25	70.404	TGCCATGTTTTCTCTGCTTG	TGTATGCAAACTGCATTCGTC	102B1C07
AUBES4789	2915	241.842	2	39.612	CGAACACACTTGATCGGCTA	TCCCTTTGGTGAACAGGAGT	062B2A07
AUBES4788	2913	170.811	28	67.105	CGGCGTCGCTTCATATTCTA	GAGAGAAGGCCAGAGGTGAG	039B2E11
AUBES4787	2902	189.414	20	45.027	AATGCTGGGATGATTGGATG	GCATTCACAAACGCCTAACA	054A2D09
AUBES4784	2884	167.429	3	63.614	TCATGAAAAGGCAGGTGTTG	GAGGTAGCATTCATGCACAA	112A2H10
AUBES4783	2883	251.989	14	27.067	GTGAGCGTTATTCCAGACAGC	ACTTCCGGGAGGTAGAGTCC	063B2E07
AUBES4782	2880	177.576	6	41.295	TTGGACAAAAGTCCTTCATCG	TGTCATGATCTCTGACCACCA	007A2H06
AUBES4781	2876	160.664	11	43.797	TGGCTGTTTGATGGATTCTG	TGTGTGTGCATGCTCTGTGT	054B1B06
AUBES4779	2856	233.386	22	27.052	CAGCCTGTTTGCCAGTAGAA	CACGACCCAAAAACAGGAAC	109A2E09
AUBES4778	2851	268.901	8	65.268	GGTGCCATTCCTTCCATTAC	TGGAAGTGCTTTGGGTTAGG	074A2G08
AUBES4776	2827	316.254	20	49.255	TTGGCTCACAAAGCCAAAAT	GTGCCTACGCACCTTTGGT	052A2F03
AUBES4775	2825	204.635	22	3.915	GTTGCGCTGATACTCGTTTG	TCGGTGGTTAAAAAGAGAACG	110A1C06
AUBES4774	2814	218.165	5	63.426	TGAGAGAGACGGAGGGAGAA	AGATGGAGCTGCCAGAACAC	042B2E06
AUBES4769	2793	123.458	3	65.017	TGTGGATTATGGGATGGATG	CCCATTCAAACAGACTTAGGTG	009A1D07
AUBES4767	2733	138.678	29	4.346	TGGAAGACCTGATTATTCTGTACG	AACGGAAAGGAGCGATTTTAG	096A1H09
AUBES4764	2719	262.136	1	25.673	GAAGGAGTCTCCGGTGTCAG	CGGTCATTCTTTCACCAACC	041B2F02
AUBES4763	2714	221.547	11	41.275	CCTCAACAATTCGGTGTGC	TCCCCCTTCTGCAAGATGT	054A1B01
AUBES4762	2704	172.502	29	55.853	ACAGCATCCGAATGTTCACC	TGTGAATCCAGGGAGACTGA	057B1H03
AUBES4761	2683	240.15	13	64.354	TCACTCAGGCTTGACTGTCCT	TCCGGTCATGTGTTTTATCG	086B1A01
AUBES4759	2673	265.518	13	16.645	GGACGTTTTTCAGTGCTGGT	CACCCTTGAGTGGCTTATCG	066A1E05
AUBES4758	2670	153.899	1	51.86	TGTTTGATGGACGTTGATGG	CACATGGGTATGCCAATCAC	060B2D12
AUBES4756	2642	209.709	11	26.718	GGGCTTCACATCTGACCAAT	GAAAGAATGGAAGGGTGTGG	061B1H10
AUBES4754	2635	214.782	19	21.079	TAAACGGTTCGCCAATGACT	CTGGGAGTGAGGTTCGAAAG	006A2C10
AUBES4753	2634	145.443	26	10.105	GGATTTTGCCTTGCCCTTAT	ATTAGTGATGCCTGCGAAGC	051A1F05
AUBES4750	2592	235.077	17	5.291	GAAAGCAAACAAAGGAAAAGG	GAGCCTCTCGTCTGAGCACT	049B1F10
AUBES4749	2577	233.386	20	42.134	AGCAAACAGTCCATCGCATA	GGTGTCCCCATACCTCTGAC	086B1D10
AUBES4748	2554	277.357	28	19.242	CGGAAGGAGTCTCCAGTTACG	CAATCGACTTCAGGATGGTG	084B1H05
AUBES4747	2550	223.238	28	19.242	CATGTGGAGCACCCATAGTG	ACCACTGTCACACCGTCAGT	007B1F07
AUBES4746	2548	169.12	20	47.533	AGAAACCGTTGAAGCTGGAG	TCAACTGTCACCTGGTCCTG	111A2C05
AUBES4744	2509	167.429	11	73.606	AGCTGCAAGCCAAAGACTGT	GGCAGTGCGGAGTCTGATA	030B1H07
AUBES4743	2501	250.298	4	56.97	ATGACCCTGACCAGGAAATG	TCATAGCCCTAGCACAAGCA	053A1C04
AUBES4742	2436	223.238	24	14.644	CATTGCTCCAAAACCACAGA	GGGCATCAATCACTTCAACA	048A2B03
AUBES4741	2403	209.709	26	34.625	TTCCCTGGAGGAATGAAGAG	TCACCAACCACCTTCTGTTG	072A1H10
AUBES4740	2401	211.4	3	30.881	TAGGGGTTCAAGCAAAATGG	TTCTTCCTCGAATCCCTGTTT	104B1C05
AUBES4739	2350	224.93	15	57.607	AAACGTTTCCTGTTCAACGTC	GGACTAGTTATGGGGCAGCA	079B1A10
AUBES4738	2323	211.4	18	73.64	TTCCCCCATTTGTCCTTTCT	AGCACACGGCAGGAAAATAC	083B2A06
AUBES4736	2295	238.459	25	70.751	CCGGCGATTAATTTGAACAT	ACCGGTGTTTAAAAGCCTCA	030A1G02
AUBES4735	2288	251.989	23	7.277	CCCGAAACTGAAGCTGATTG	TGTCTTTTCCTGCTGCTCAA	035A2D03
AUBES4729	2071	216.474	1	25.504	TTTTTCCACCAATATGACATGA	TAAGTGGGTGGGAAATGACA	033A2G08
AUBES4728	3543	101.472	24	29.14	GCCTTGGTCCTTTCATCTCA	CACCTCTTCTGCAACCACAG	063B1E09
AUBES4726	3467	186.032	28	46.493	TTGTAGGTGCACGGATGAAG	TTGTGCTTTCGCGATAAAAG	032A1H05
AUBES4724	3364	165.738	1	44.759	GCATTAAGCTTTCAGCTGTGG	TTCACGCAAACATACATTCG	074B1C06
AUBES4723	3317	182.65	22	30.332	TGCTTAGGCAACTGCTTTCA	ACCATGCACACACACAGAGG	025B1C02
AUBES4720	3271	165.738	1	25.186	ACACATGGGGACATTTGGTT	TTCCTCCTTTGCGCAATAAC	018B2H06
AUBES4719	3251	164.046	7	69.659	GCCAAAACAGCAATAAGGTGA	TCTGAGGTTGAGGAACTGTAGGA	021A2A03
AUBES4718	3240	275.666	3	31.994	CAGAGTCTGTGAGCGGTCTG	CCAAAAAGTTTGAACTGAATCG	090B2G03
AUBES4714	3196	301.034	12	25.121	GAAGGCAGATCCCATCTCTG	TAGACAAGAATGCCCGAGGA	079A1C11
AUBES4713	3196	301.034	12	24.92	CCAGAGACCCCTGCTAATGA	AGGGAGCTTGAGTGTCATCG	049A1D08
AUBES4711	3175	121.766	20	61.836	GCGCCACATGATGAGAATTA	ATTACGGGCCTTGCTTATCA	105B1B03
AUBES4709	3120	180.958	4	59.675	CTCCCAAAATTCCCTTAGCC	TTTTAAGCTTCCGGTTTAAGTG	093A2E02
AUBES4708	3120	180.958	4	59.567	ACAAGGCTCCGAAAGACAGA	ACAGTGAGTGGGCTTTACGG	082B2F07
AUBES4707	3110	191.106	6	41.047	TTATTTTTGCCAGGGGTTGT	TTCTCACCACTTGGGGTCTG	070B1H10
AUBES4705	3088	365.299	29	45.708	CGTTTGCCAACAAACATCAC	TCTCCAAAATTTGCAATCCA	052A1D09
AUBES4704	3085	142.061	3	83.053	TGCCGGTAGGTGCCTAAAAT	CGGTTAAGGCACATTGGACT	102B2G01
AUBES4702	3060	197.87	3	64.84	TGTGATTGAACCCTTCAGACC	CTCAGTGGCTTGCTCAGTTG	064B2E11
AUBES4700	3037	306.107	5	45.964	CCTCATTTTCCCTCATGTCG	TGTGGCTGAATTCTGCTGAT	058B1F01
AUBES4699	3019	262.136	5	53.632	TTTAGTGGCTGGGAGGTTTG	CTCATTCACAGTGTTGCACGTA	077B2D05
AUBES4698	3007	177.576	2	10.993	ACCACTGGGTGCTTTCTGTC	TCCAGAAGCGTGTCACTGTC	072A2G03
AUBES4697	3006	230.003	1	23.228	CATGGCCGAAATTTGTATTTG	CACCGTGGCATTCATTACAG	003A1H09
AUBES4696	2954	231.694	29	40.511	TCTCGACTTTCTCTGCCTGTC	TTCCATCATCCTGCACTCTG	003B2A01
AUBES4695	2950	143.752	20	55.443	TCGCTCTGTCTTTTGGGAAT	TTTCAAACCGACCGACAATA	002B1E03
AUBES4694	2946	148.826	8	43.082	ATGCGCACACCCTCATACTC	CGGGGGAAATGTTAAAATCA	083A2E06
AUBES4691	2909	170.811	29	36.334	TGGGGGAATAAATGTGTTTTG	GGCTTCGTGCATCATTAACC	076A1F05
AUBES4690	2892	265.518	3	33.38	AAATCACGCTGGAGGGTTC	ACCAGCCACAACTCAGATCC	070A2B03
AUBES4689	2889	167.429	9	9.09	TTTTGACAAAGCATGGCAAG	TGACAGAGAATCAATGGACTCATAC	010B2D03
AUBES4688	2864	169.12	5	45.854	TCAGCAGGTTCTCCCATTTC	GGCTGCTGGGAACTGTAGTC	093A2D02
AUBES4686	2861	165.738	5	62.131	TTCTTGGGAAGAGCTGGAGA	TGAAGAGTCCCCAAAACAGG	065A2C09
AUBES4685	2861	165.738	5	60.149	TGAATCACATGTAAATGAATCATACG	GCAATTTCCAAACAACAGAAGG	014A2F11
AUBES4683	2855	179.267	23	38.36	CAGGATAGCATCAGGACGTTG	GGTACAAGCGCGCTAAATTC	060B2D09
AUBES4682	2844	147.134	18	33.457	AGCCGGCTAGAATGTTGCT	TTGCATTCAGCTTTCCACAG	051B2B05
AUBES4681	2832	158.973	4	58.033	TCCGAATGTTATGGCAGGA	GGTCAGGAAGAAAACGATGC	108A2B06
AUBES4679	2811	199.562	25	69.656	AAATCACAGGCTACCGCAAC	CTCAGCATCCACCTGCAAT	011B1D09
AUBES4677	2807	197.87	10	11.737	TTTGGTGAACGGTGTGACTC	TTCCAGTGTGTGGTTTTCCA	024A1D02
AUBES4676	2803	201.253	23	53.579	TCCACATGAGCGCATTTAAG	AAGCAACAGAAAGCCATTAAGAG	092B1A11
AUBES4674	2779	221.547	25	0	CATCATATATTGGTTTGTTTAAATTGG	TGGTGCTAATACGATGATACAAGG	109A1E11
AUBES4672	2775	197.87	27	48.45	ATTGCCGAAGCCTAATTTCC	TGTATTTGTCCGCCCTTAAA	006B1G03
AUBES4670	2760	162.355	22	64.898	TCCAGCTAGCGATGTTAGGTT	GGGTGACGTGTTTTTGTTTG	077B1G08
AUBES4668	963	392.358	7	66.36	TTAAGATGTGGCAACGGATG	AAGCACATAATCTCAGTTCACACC	020B2H09
AUBES4667	963	392.358	7	69.576	CCATGGCTGCCAAATGTATAG	GTGACCTGGGGAAATGTTCA	006A1C07
AUBES4666	680	348.387	9	9.009	TGCAATCGAGCCAGTTACTC	GGTGTGAGGCAAGTGTGCTA	088B1B06
AUBES4665	611	372.064	10	69.462	ACATGGACAGCTGCTGAGTCT	GAACAAAACAAAAACGCCATT	100A2A11
AUBES4664	386	277.357	17	5.271	AGAGGGCTCAGTGTTGTTGC	CCTCACTCACCTCCACACCT	073A1F06
AUBES4663	386	277.357	17	5.273	TGGAATCCAAGACTTTGTGG	TCTGAATCTGGCAAAAGTGC	011A2G06
AUBES4662	385	468.462	20	51.018	TCTTCTTCCAGAGGTCTTCCAG	TGAGAAGAATCTGCTGCATCC	052A2B02
AUBES4661	263	260.445	20	51.018	TGAATCTGTCCTTTGCACCA	TTCAGACCCAGAAGATGAGGA	095A1D09
AUBES4660	263	260.445	20	50.91	CCTGAAGATCATGGGGAGAC	CGAGCGCTTTCTAACAGTCA	026A1B09
AUBES4659	176	329.784	9	21.629	CGACAGAGCTGGAGGGTAAG	TGTGTCCCATAGCAGGTCAG	063B1E07
AUBES4658	176	329.784	9	7.378	GCCTAGTGGCACTCACATTG	CTCCTCCCAAATGCTGAAAC	058B1F03
AUBES4657	138	453.242	28	71.634	CATGCTGGCACAAGAGAGAG	TGGGAATGAAAGAAATTGCAC	112B1D03
AUBES4656	138	453.242	28	71.915	GGATGGCAGAGAAGGAATGA	TTTCAGAATTGGGGTTGTACG	109A1E05
AUBES4655	138	453.242	28	70.011	AAGCCTCCATGGGCTAGTAGT	TGGGAATGAAAGAAATTGCAC	080B1A07
AUBES4654	758	277.357	27	39.302	GGGGCTAAACTCGGCTTATT	TGAACTCTTATGATGGGAAAACTT	061B1D09
AUBES4650	718	306.107	1	25.713	GCCTGTCTGTTGGTCTTGGT	AGACAGGCAGAAAACATACAAGAA	029A1A02
AUBES4646	554	297.651	25	59.998	AGGGTGTGTTGGCTTTCTTG	CAAACAACTGTTGCCTCGAC	065A2F06
AUBES4644	520	160.664	5	64.641	ACCTGCTGCTGTCTGTGTCA	TCTGCTGGACTGGAGAATCC	047A1H06
AUBES4643	472	221.547	11	70.638	CTGGCACGTGTCCAATCTT	TGGAAGTGTGAGCATGATGG	023A1E02
AUBES4642	465	248.606	9	8.474	AATAAGGCAGCCAACAGTCG	AAAACAGGAAGTAGAGTGATTTTCA	028B1D06
AUBES4641	448	245.224	1	26.247	CCTCCCATAGCGTGGATCT	CTTGGGAAGCTGCATCAAAT	004A1H02
AUBES4639	390	251.989	9	8.536	GCAGAGCGATATCAAGCAGA	ACGAAAGACCCACCTCTTCA	072A1C12
AUBES4638	380	199.562	7	59.106	GCTTGGACCCCTAACAACAA	GTGTTTGTGGCTGTTCCAGA	029B2F11
AUBES4637	362	214.782	6	40.352	AACAGGAGGTTCCGAAATATCA	GACGGGGGATCAATAACAGA	024B2D09
AUBES4636	293	221.547	23	0	GCAGTGGTTGCTGGTCTTTT	TGTCCATCTTGGTGATCTGC	087A1E07
AUBES4634	255	226.621	26	31.439	GCACTCTAACTAACCAACCCACA	ACCACCTGCACAATGTCATC	001B1D04
AUBES4633	2173	351.77	2	56.412	CACGTTTCGAAAATAATATCAGGA	GTTTTGCTCCTCCTTCCAAA	035A1F05
AUBES4632	2029	260.445	25	45.952	GGTTTTAACGCACACCTTCC	AAGCTGGCTGCACGGTATTA	004A1E03
AUBES4630	1997	240.15	24	13.655	CTACCAGGTTGGGCAGACTC	TGTTTCAGTTCGCTGCACTT	061B2A05
AUBES4629	1956	488.757	16	18.086	AGGGGGAAGCGACATGATTA	ATGTTTGCCGATTACAAATGG	096A1G08
AUBES4628	1956	488.757	16	19.764	CCTGGAAAAGTTTGGGAACC	TCTGCGTGCTTTTGTTTTGT	058A2E09
AUBES4627	2248	155.59	8	44.427	CAGCAAGCAACCATCAAACA	TGCATCACACGTTGACACAT	041B1C12
AUBES4624	2169	214.782	1	26.013	CCCGTTTTCTTTTTATGCTTGT	ACACTGATCCCCAAGTTGCT	107A1F01
AUBES4623	2165	319.637	27	93.821	TTTTACCCTGGGAACGAATTT	CATTCTGTGCAGCGTTCACT	047A2A01
AUBES4622	2163	245.224	13	49.671	CCGTCCTGGTATGAATCTCC	CACACAAAATCTCGGCACAC	072B1B12
AUBES4621	2156	236.768	15	34.095	TGTTATGTGCCTTCCAGCAG	GAATGTGCAAATGCAAGCAC	014B2H03
AUBES4620	2153	268.901	3	99.862	CCTGTCAAATCGGAGACGTT	CGACAGGGGCTTTGAATATCT	079B2B08
AUBES4619	2132	410.962	25	66.215	TCTGGTGCAGTAAGCTGTGG	CCTCGCTCATTCAGAAATCC	105A1A03
AUBES4618	2122	233.386	26	25.23	CGTCGCTTCAGTGGATTCTG	TTATTTTTCATTTTGTATGTATTCTGC	053B2B05
AUBES4616	2117	221.547	24	30.821	GAAATTGCCGGGAAAGTGTA	TGTCTATTATGGCATTTTCTCCAA	028B2A09
AUBES4615	2115	224.93	18	39.623	TGCAATTTCAGGACAAACCA	ACATTCATGGACACATATCATGG	011A2F02
AUBES4612	2063	221.547	10	66.164	AGACGGTGGACGTAATCGAG	CATGCACGGCCACATACTT	112B1D12
AUBES4610	2054	240.15	8	39.213	CGTCTCTCACCCATCAGCTC	ACATCATCGATTCGCTGTAGA	064A2H12
AUBES4608	2038	290.886	28	47.898	CATCGCGTTCTGATCTCTCA	CCATCCGGTAATGCAATTTA	042A2D12
AUBES4605	1989	192.797	14	8.744	CGGAGGTCATGCACAGTCT	TTATCCTTTCAGCGCCTTTC	111B1B04
AUBES4604	1989	192.797	14	7.079	CTCACGGATGGAGCTGAGAT	CCACAAGCTGGAGGTCAGAT	074B1H06
AUBES4603	1982	223.238	26	15.295	CAATCGCAGGTGGTCAGACT	TCGACTCATCTGTGAGCTGAA	049B2C03
AUBES4593	1893	189.414	3	74.376	TGGAAGCAGGAAGAGTGACC	ACTGGGTCAGCTGGAGTACC	085A2G03
AUBES4591	1868	255.371	8	43.824	ACACTACCGCTTACCCGAAA	TGCAACCTTTATGCTCCTCA	010B2B03
AUBES4586	1965	194.488	12	24.24	GGCTTGTGCAGTGTTGATTG	TGCAGTTCCTGACTGCTGAA	108B2H08
AUBES4585	1948	243.533	19	69.993	GCAAAGACTCCTGGGTAACG	TTGCAACTTGAAGCCTCCTT	104B1A02
AUBES4583	1925	272.283	29	97.159	CAGCGTTAATGACGCAAGAA	TCCAGTCCTCCGAGTCAAAC	080B1B10
AUBES4582	1918	248.606	28	78.399	GGCTCAACTCTCCCACAAGA	CTCCATACCGTGTCCTGCTT	105B2A11
AUBES4581	1918	248.606	28	78.954	TGGTTAGTGGTGGTGAAGCA	CAATTGGTGGACAAGATCAGG	014A1D06
AUBES4580	1904	206.326	23	53.579	GCTGAAACGCTTTAGGTCCA	CGATTTGAGACGCATCTGTT	086B1G08
AUBES4578	1893	189.414	3	74.348	TGGAAGCAGGAAGAGTGACC	ACTGGGTCAGCTGGAGTACC	085A2G03
AUBES4575	1865	191.106	12	0	CGCTAAGTTCCTGCCTTTTG	CCTTACACCAACGGTCACAC	106A1H11
AUBES4574	1863	211.4	5	44.517	TGAATCCATGGAGCAACATC	TGTGATGGGGAAAAGTGGAT	038A1A04
AUBES4571	1817	251.989	9	26.929	TGCCATAGAGTGAGCCGAGT	GGGGAACCTTTGTGAACCTT	070A1A06
AUBES4570	1803	221.547	4	26.363	TTCTTCCCTTCCTTCCTTCC	ATGCAGGGAATTGGTGAGAG	072A1E08
AUBES4567	1786	196.179	5	58.404	ACCTGCAGGATTCAGGAGTG	AGGGGGTGAACTTTCAGTGAC	054A1B03
AUBES4565	1756	221.547	4	56.004	TCAGTTGACTTTGGGGGAAA	TTGTGCTATTGTGACCTGCTG	111A1F11
AUBES4558	1740	192.797	22	66.259	TGATCAACGCACACAAGTCC	CACACAACAAGCTTCTGGACA	086B1D04
AUBES4550	2951	231.694	7	69.229	AGGCCAGATGCCTACCATAG	CCAGTGCACCAGTGTTATCTG	010A1F01
AUBES4548	2830	338.24	25	60.657	GAGAGGACGTCGGTGTAGGA	AACACCCCCTCATTTTCCAC	011A1H01
AUBES4546	2810	351.77	8	16.815	GCCTAAGAGACTGGCTGTGG	CGGAGAAATCATGTCCTGGT	073B2G07
AUBES4543	2306	186.032	4	59.043	TGCGGGTTTTGTTTTTCTTC	CGAACGTGCTAACCACTAAGC	086B1F03
AUBES4541	2276	235.077	1	27.058	CTCCAACCTCATCAGGCATT	TGCAAACACAAAACAGGTGTG	088A1C07
AUBES4540	2276	235.077	1	25.437	GTGGCTTTACCTCTGGGACA	GAGCTCATTCAACCGACTTG	078B2H04
AUBES4536	2020	174.194	20	64.695	TGCTTTGGATAAAAGTGTCTGC	CTTCCATGCTGGACAGAGGT	024A1G01
AUBES4534	1977	233.386	16	97.485	CATTGCACATCAACAAACCA	CACGGAATTCGTGACAAGTG	004B2A08
AUBES4530	1797	316.254	25	71.711	AAGAAGCGTTTGCAAAAAGG	GGGCACTGCAGGAAGATAGA	052B2E04
AUBES4529	1002	238.459	5	43.144	CGGAGCAATACATCACTGGA	TCTCCACCACTCACATGCAC	006B2B03
AUBES4528	1002	238.459	5	44.918	GACCTTGCCATTCCAACAGT	TCTGTCATGTGTTGGGCTTT	002B1G04
AUBES4526	874	292.578	20	1.094	AAATTGATCACTGAACTCATTCG	CCATCCACGTCCTTGTAGTG	008A1B10
AUBES4525	715	409.27	20	38.315	ACACACCACAGCAAGCAGAG	GTTTGCTGGTGTGTTGCACT	085A2E10
AUBES4520	663	226.621	26	47.789	CTTCAACCAGGCCACAAATC	AGTGTTCCACTTGCATTGAGC	004B1B11
AUBES4517	416	319.637	13	32.291	ATCCAGCGCATCCCATTAT	GATTTTACGCCTGCGTCCT	091A2D06
AUBES4516	416	319.637	13	34.185	CGATATCATCGTCGCAAATTC	AAATGCCGAATGACAGTTCC	010A2H04
AUBES4512	394	416.035	17	5.291	TGCAGTCCATCTCTGGAACA	GCAGCTGGAGTTTCATCACA	078B1F09
AUBES4507	2914	209.709	8	45.822	TACAGCTCCCTGCATTCCTC	GGCTGTCTGCTTGGTCTTGT	028B2D02
AUBES4506	2804	429.565	10	20.58	CTGTTCCAGCACATTCGAGA	CGGATATGAATACGAGGAGGA	007B2F04
AUBES4502	2532	273.974	3	75.903	TTAACTCTGCCTCGCCCTTA	CATAGCCACCCTAGCCAGAT	100B1B09
AUBES4501	2513	304.416	9	31.985	CACACCATTCCGTACACGTC	AGCAGAGGAAGAGTCGAAGG	072A2F05
AUBES4498	2424	289.195	4	86.113	TCAGATCACGTCGCTACTGG	CTCCATTGATGCAGTGAAGC	096A2D04
AUBES4497	2406	164.046	20	54.888	TTGGTTTATCAGCGGGACAT	CGCTCCTACTGTGGTGATTG	013B1F04
AUBES4496	2356	219.856	4	55.513	TTGCTTTAGTGTTTCGTGAATTG	GCAGATCCCACCCTAACTTG	030B1H04
AUBES4493	1660	202.944	8	79.472	TCTGATTGTCATCTCATTGCTTG	TCGAATTTTGGAGGATTTGC	075B1G06
AUBES4491	1655	211.4	11	44.183	AACAATTTCCATGGCGTGTA	AAGTGGCACAGGGAAAAGAG	100A2D10
AUBES4488	1578	218.165	22	66.06	CTTTGGGAGAGCTCACTTGC	CTGAATGCATGGTGGTTGAG	112A2G02
AUBES4487	1572	204.635	2	39.719	TGGCAACTGGAACAGTGGTA	CGGGTGATGGATAGATGGAT	075A2G11
AUBES4484	1553	182.65	29	56.603	CTGGTTCAGCATGGATCAGT	TTCACAGCCTTCTTTGCTCA	071B2B02
AUBES4483	1542	170.811	1	40.12	TGTAGACTGAGCTTTGTGGTTCA	CATTGCTGTAGGGCTCTTTACAT	055B2D03
AUBES4480	1506	245.224	4	58.124	CGTGTTGGGTTTCATTTTGTT	GCAGCATGTCATGGCTTTAG	090A2A05
AUBES4479	1497	282.43	19	90.907	GCCAGGGAGAACTGAAGACA	AACACTGAGCCAAGGAGCAT	038A2G08
AUBES4478	1495	250.298	10	72.187	TTGCAGGGAGGAAAAGTGAC	TCTCTCCATCTCTCCCTGTCTC	029B2F06
AUBES4476	1408	273.974	3	30.207	ACCTGTACGGTCGTCACTCC	TTAAGCTATTGCTCCGTCCA	090B1F08
AUBES4475	1330	204.635	11	42.33	AATACGTGCGACTTGTCCAG	CAAAGGGTTTCCTTGTCGAG	098B1C10
AUBES4474	1298	273.974	25	70.4	TCCAGTGGAAAAGAGCCTGT	AGAAGCCAGAAGTGGGTTGA	075A2E11
AUBES4473	1294	230.003	14	53.286	AGAAGTTGGGTTTGCACTCG	AGCTCCTCACTGGACCAAAG	074A2C09
AUBES4472	1270	238.459	8	13.484	TCAGGACGGTTCGGAAACTA	AAGCAACGGTGGGAGAATTA	107A1C07
AUBES4470	1242	189.414	22	66.259	CGCTTCAGCGGACATAAAGT	GGGACTTCCACTGCATTTTC	096B1B07
AUBES4468	1153	180.958	1	28.071	CATTAGGCCTAGGGGATGGT	CGTGTCCAAAGGGTCCATAG	106B2C06
AUBES4467	1115	309.49	14	15.565	AGGACGTTCTGATCGACTGC	TGTTCTTGTTAACCCGAAAAGAG	053A2B05
AUBES4464	932	184.341	13	51.339	CGTGCTTGTGTTTGTCTGCT	ACCCAATTTGTCAGCGCTAT	051B1F10
AUBES4462	888	201.253	3	65.573	ACATGTTTGCAATGCCACTC	TGGCAGCTCTGCTACCACT	034A2F08
AUBES4461	805	194.488	7	58.688	AGATGTAGCGCATCCACCTC	GGTCCTGTAAGTAGGGACCAGT	108A1B09
AUBES4460	792	169.12	4	54.139	AGCTCAGCCAGTCACTCCTT	CAGCAGTCACCATTTACACTCA	104B1A09
AUBES4459	785	219.856	22	14.667	TTTGTATTCCGTCTCCTCTGC	AAGTGCTCCGAGTGCTGTGT	035A1H01
AUBES4457	1706	233.386	2	51.33	TTTCACTGCAGAACCTGCATA	TGTAACTTGTCGATGGCGAAT	078A1F03
AUBES4456	1706	233.386	2	53.054	CAGCAAGCTAACGGTGATGA	GCCCAGGAACAAAAACTGAA	072A1E03
AUBES4455	1700	255.371	14	73.214	CCATGTGCTGAGTATGGCATT	GGAGCCTCGAAGTTGATGTT	103A2G11
AUBES4452	1596	279.048	25	75.199	CGCTTAATAGGACGGCTGTT	ATGAAAGGCACAGACGCATT	032B2D06
AUBES4451	1507	189.414	25	59.892	GACCCCAATCCACCTACTGA	TTCCTACCTGCCATTCCTCA	029A1D02
AUBES4450	1507	189.414	25	60.067	TGCCTTAAGGGAGCTCACAA	ACATGCAAACTCCGCACAC	004A1G05
AUBES4447	3090	230.003	14	53.629	GGATTCAACAATGAGCAGCA	CTGTCTGAAGGGATGCTGTG	033B2A05
AUBES4445	2920	268.901	16	24.371	CACAGCGAGATTCCAGATCA	GACTTGGGACACGCCTTTAAT	055A2B08
AUBES4443	2866	192.797	8	43.203	TGCATGTTTACCATTGCATC	TGAGAGGTGCTTCCCATAGC	078B2A05
AUBES4442	2866	192.797	8	45.577	CCTGGCATTAAGAGGCGTTA	TTGAGGTTGTGTTCACAGTGC	012B1B09
AUBES4441	2839	245.224	5	45.707	GATCCATTGGAACACACGAA	AATTACCTGGATGTGGCTTCC	028A1E01
AUBES4440	2839	245.224	5	45.585	GCATAAACGTTGGGTTCAGG	GTCTGCGCAAGTGTGAATGT	002B2B02
AUBES4439	1427	238.459	26	36.332	GAGGAAGCAGGCTGAACTTG	CCAGGAGCTCTGTCTCGACT	108B1F03
AUBES4437	1272	216.474	1	25.552	GCACAATAATGTGGTGGGAAA	CGCTTTCTCTTTGTCCTGCT	087B2H07
AUBES4436	1272	216.474	1	25.59	GACAGCAGAGGTGGCCAATA	AACAGCACTCTTGCTTGTGC	023A1C09
AUBES4435	998	199.562	2	41.951	CGAATTCGCCTGCTATCTGT	GCACAAGGAGTTGTGGGAAA	090B1A08
AUBES4434	998	199.562	2	41.894	GTTCGAATTCGCCTGCTATC	GCACAAGGAGTTGTGGGAAA	063B1G01
AUBES4433	900	218.165	16	102.787	TGACTTTGCATTCTGTCTTTTC	TCGACTCGTCCTCTTTTTGG	108B1H01
AUBES4432	900	218.165	16	103.837	CGAGTCCTCTGGGAAATGAC	GCAGGAGCAAACAGACTTGG	033A2F03
AUBES4431	3090	230.003	14	54.147	GGATTCAACAATGAGCAGCA	CTGTCTGAAGGGATGCTGTG	033B2A05
AUBES4430	3090	230.003	14	55.412	ACATCCGAGATGAGTCAAACTT	GAGGGAATGACAGAGGCAAC	006B1D03
AUBES4429	2920	268.901	16	24.371	GCCATCCCAAACGTGTACTT	GCCAAAGATCGAAGGTGAAA	055A2B08
AUBES4428	2920	268.901	16	24.408	CGACAAAAACAAATCCGATG	GGAAACGTGCTAACCGCTAA	038A2D02
AUBES4427	2866	192.797	8	43.065	TGCATGTTTACCATTGCATC	TGAGAGGTGCTTCCCATAGC	078B2A05
AUBES4426	2866	192.797	8	44.584	CCTGGCATTAAGAGGCGTTA	TTGAGGTTGTGTTCACAGTGC	012B1B09
AUBES4425	2839	245.224	5	45.328	GATCCATTGGAACACACGAA	ATTACCTGGATGTGGCTTCC	028A1E01
AUBES4424	2839	245.224	5	46.067	GCATAAACGTTGGGTTCAGG	GTCTGCGCAAGTGTGAATGT	002B2B02
AUBES4419	2530	427.874	21	50.168	GCTTGTTGTCACAGCGTTCA	CGAACACACAACTCCCACAT	092B1F04
AUBES4416	2476	279.048	17	5.28	ATTCCAGCCACAATTCCTGA	GCCTTGGACTTGCAGCTACT	112B1F04
AUBES4415	2476	279.048	17	4.125	CGGCTGGATCGTTAAAATGT	CGCGTAATGATCCGGAAA	030B1H05
AUBES4414	2439	380.52	1	68.163	CAGGACCTTCTGCTCACCAT	GCACTCGTCTTTCAGCCTCT	102B1B04
AUBES4412	2434	272.283	23	25.119	CTGGGATAGGCTCCAGGTTC	GGGGATGCAGTTAAACTCAGG	077A2F09
AUBES4411	2357	265.518	26	25.899	CCACCCCGTCATTGATTTAT	TCGGCATGTCCACAGTGTAT	074A1D06
AUBES4410	2357	265.518	26	29.527	CGCACGACTCGGACAGTAAT	TCTGAGTCACGCCATGAAAG	030B1F12
AUBES4407	2112	231.694	10	76.781	TGTAGCTTGTCCTGTAATATGCAC	GCTGCAATTATCCAAGATGG	045A2D03
AUBES4406	2112	231.694	5	45.854	GGTTATCGGTATCGGCTGAG	CAGTGTTGTCGCATGAACAG	030B2G03
AUBES4405	2092	334.858	21	65.268	TCCTTCTCCGCCGTATTATC	TGATTGCAGCTCGTTAGTGG	094B1F03
AUBES4404	2092	334.858	21	69.809	CATGAGCGTTAGTGCTTTGC	CTGCCAACCATTACGAGGTT	046B2G06
AUBES4403	1988	202.944	17	5.88	TCAGAAAGCTGGGGAGAAAA	GCATCGACCGAATGTAAGTG	075A1B04
AUBES4402	1988	202.944	17	5.291	CAGCTCTGAGCAGACACACA	CTGTTTCCCTCCTTTCATGC	020B1D12
AUBES4401	1907	280.739	8	43.337	GACACCCTGAGTAAAAGGCTTG	AACACGTTTGGTCGTTAGCA	090B2F12
AUBES4400	1907	280.739	8	48.847	TCACCATGCTCAATGAAATGT	GCTTGCTCAATGGCTACAAA	028A2C01
AUBES4399	1903	262.136	8	79.09	TCGAAGACGAGTGATCCTGTT	GGAAAGTGAAAATCAAAAGAAAAT	011A2H01
AUBES4397	1891	331.475	13	100.71	CCATTAATGAGCCGCTATCC	TGGTTATCCAACTCTGCTTGTG	107A2B05
AUBES4395	1869	236.768	3	42.237	CTCAGGCATTACAGCAGCAG	AGCCCTGTGACCTAGTGAGG	109A1C12
AUBES4392	1857	360.226	23	7.414	TGTGGAACTGTGCCTTTTCA	CTGTGTTCCAGCATACTGAAGG	079B1F02
AUBES4389	1842	218.165	6	8.392	GGCTGCACATTCTAACAAGG	GATGCCATCCAGTGCATTTA	031B2D11
AUBES4385	1698	260.445	11	44.979	GTTTACCACATTCATGCCAGAG	TGATGTGAGTCTTGCCAATCA	026A1F10
AUBES4384	1646	235.077	12	19.388	GCTGCAATTCGGAGCATAAT	GGGTACTGGAGTCCCACAGA	108B1F10
AUBES4383	1646	235.077	12	21.072	GCTGCAATTCGGAGCATAAT	GGGTACTGGAGTCCCACAGA	011A2D06
AUBES4381	1626	258.754	24	68.186	GAAGTCAAGCGCACTCTTCAG	GAAGATGTATCATATGGATAGCTAGGA	001B1C10
AUBES4379	1563	219.856	20	6.532	GATGGGGTCCTGAAACACTG	CACTCCCCATCACCAAGAAC	024A2H03
AUBES4378	1551	201.253	27	46.386	TTGTGCCTAAGCAACAACTCA	CATGGCCCAGTGAAATCTG	072B2G03
AUBES4375	1575	312.872	17	5.273	ATCCACAAATGATCCGAAGTG	CCGAAGCACTAACAACAGCA	008A1B11
AUBES4374	1234	424.491	5	44.517	CTGGAGTGCGATCTGTGAAG	CAGGGTTCAGTGACGTAGAGC	086A1C02
AUBES4373	1178	316.254	11	44.933	AGCTCCATGGATGGAATTTG	AACGTCAGTTGCTGGGATTT	077B1D02
AUBES4372	1178	316.254	11	44.165	AGCTCCATGGATGGAATTTG	AACGTCAGTTGCTGGGATTT	038B1G07
AUBES4371	1090	289.195	6	40.83	GAGGCGTGTGTGGTTATGTTT	TCCCAACAGTCAGTGATTCAG	101A1E06
AUBES4370	1076	483.683	28	66.614	ACACGAAGCTCCATGTAGGG	GAAAGCGCAACACATTGAGA	094B1B12
AUBES4369	987	326.402	17	8.471	CCAGGCCAGAAGTCTTCATT	TGCAGCTGGGAGCTCTTATT	007B2A05
AUBES4368	895	358.534	8	6.058	GACACCCAGTCAGTTGTGGA	CAGTGTTTGGTAGGGTTGCAT	109B1A01
AUBES4367	895	358.534	8	6.187	CCTCTGTGGCTTTTCAAAGAA	AAATCCATGTTAGCGGCTTT	074A1D08
AUBES4366	780	233.386	8	73.187	GATCATTTTCCGGAAGGACA	GGGAGCATGTCACCAATCAT	030A1C08
AUBES4362	738	304.416	13	54.605	TTGCACCACAGTGCTATTGA	TCCCTTGGTATCTTCATTTTCTG	056A1F09
AUBES4361	710	339.931	14	75.307	GCTCAAAAGGTGAGGACTGC	AGATCGGGTTTCTGTCTGGA	034B2B05
AUBES4360	695	564.861	24	21.034	ACCAGGAGCTTGTTGACTGG	TTCGTTCAGGAATCCAAACA	080A2D12
AUBES4357	653	287.504	5	42.727	GAGTGGTCCTGAGAGGTGGA	TGCTATGCTGCAAAGACAATG	001B1F04
AUBES4355	581	353.461	28	0.807	CTGCATGAGATTTAAAGGGGTTA	GGGGTCATGACGTGAGAAAT	093A2G05
AUBES4354	544	292.578	4	56.787	GTTAGCTGCAAGGGAATCAA	TCCATGAAATGTCCGCATAA	046B2C04
AUBES4351	408	720.451	8	43.958	CTGCATAATACCAAGCAACTTGT	TGTGCAGTCGTGAGATGTGA	058A1A02
AUBES4350	377	339.931	3	63.674	TGCCCTAAAAAGCTTTCCCTA	CATTATGGGTGCTGTTCACCT	063A1B05
AUBES4349	339	348.387	5	48.801	CTCGGTCAGCTGATGGGTAG	TTCTCCCAATCTGACGTGCT	096B1B05
AUBES4348	267	363.608	7	71.754	GCAGCACAATTGGCATTATT	TTCCCTGTGACCCTGAAAAG	067B2H09
AUBES4346	190	529.346	5	44.517	CGTGTTTGTGTAAATGCGTGT	GGGTGAATGTGCTTTATGCTC	003A1F02
AUBES4345	159	449.859	8	48.789	AGTTGGCCATCAAAAACCAG	CAGGAAGCGTTTTGACTTGA	085B1F05
AUBES4343	97	598.685	3	58.622	GGTGGGTTGCTCACAAGTTT	CAAATGCCGGTATGTGGATT	053B2A05
AUBES4341	2277	246.915	5	67.634	ACCTCCCTCCCTGACGTAAC	ATGGCAACCAGCTGAAAAAC	006A2B04
AUBES4339	2266	170.811	5	44.05	AGGAAACAGGCCAGACTGAA	GAAGATGGATGGATGGGAGT	008A2C10
AUBES4338	2245	290.886	7	69	AGGCCCAGTTGGTATTGGAT	CAATGATTCTCATCCCCAAA	055B2F03
AUBES4337	2240	248.606	29	56.603	GACGGGCCGTTGAATTATTA	ACTTATCGCACATGCTCTCG	077A1B07
AUBES4334	2227	253.68	27	39.302	TTCGACATAGAACACCAGAAGG	TTTGTTTTCAGGCTTGTTTTG	083B2H09
AUBES4333	2201	292.578	26	49.514	TCCCACACTTTGTGGTTTCC	GCTGTGGAACGTCCACTAAAC	095A1G08
AUBES4331	2182	209.709	5	45.996	AGTGGTCCTATGGGGTTCCT	GCACTGCAGCTGGAAATACC	078B1E03
AUBES4329	2146	297.651	15	83.245	TGGCTCAGCATGTTTTTCAG	GCTTCAGCACTGTGAGATCATT	011A2F06
AUBES4327	2114	197.87	23	43.291	TGTTCCTGCCACTGTGTTTC	ATCTGACCGTCTGTTTGCAG	046B2C05
AUBES4323	2065	201.253	17	5.291	TTTTCATTTCTCAGGGTCCAG	CCCTTTCACTGTCAAGCACA	044A2A06
AUBES4322	2043	204.635	14	49.741	TGCTTGTCCGAATGTGTGTT	GTGGGGTGAACCTCAAAATG	087B1H01
AUBES4321	2019	238.459	1	44.515	GGAGTGTCCAGTGTCAGCAG	GTGGAACTGATTGTTGGAAGC	106B2A07
AUBES4320	2017	191.106	17	5.273	GAGAACACGTGCTGAAAAGC	TGGCTGTAATTATCCGCTCTC	072B2C03
AUBES4317	1964	228.312	27	98.224	GAACTCATGATGGAGCAGCA	TCAGACCACCCAGTGTTTAGG	021A2D07
AUBES4315	1958	150.517	11	44.726	CCATTCTCATGCACAAAAGC	AACCGAATATGTGACCCACAA	030B2E08
AUBES4314	1947	197.87	16	50.433	AGACGGAGCAGAAACAGCAG	GCTTGCAATTCTCTCACACC	102B1C11
AUBES4313	1947	197.87	23	29.735	GGTGCTCGCTGTTAACCTCT	TCTCCGAGCCGCTGTTATAG	077A1A06
AUBES4312	1944	241.842	26	47.161	GGACTGGAAGCCAGATGTGT	ACCCGAGAACACAAACTTGA	029B1D08
AUBES4311	1943	224.93	20	55.418	GCTGGTCCAGGATCTGTGAT	AGCACGTTCCTCTCCTTCAG	047B1G05
AUBES4310	1934	336.549	1	51.034	CGTTAAGGCTGCTCCAGATT	AGGGAAAGCACACGACAGTT	104B1G04
AUBES4305	1914	387.285	16	15.794	TTCTGTGGAAGCCCTGAACT	AGGTTCCACTGTGACCCTGA	054B1F03
AUBES4304	1885	248.606	6	41.306	TCCTGACTGCCAACAGAGATT	CCACCATGCATTTTGTTTTG	027B2C02
AUBES4302	1845	238.459	8	41.938	TCGGTTAACATGCATCCGTA	GAGCTGACAGAGGGGAAAGG	005B1D04
AUBES4295	1768	197.87	25	47.671	CTTGCGTGCACAGATACAGC	CACTGAGCTGCCTTCCAAAT	112B1C08
AUBES4294	1743	235.077	11	45.04	TCACATGTAGGGCATGTGGT	TCTGGTGAAAATGTCCTCATTG	106B2G02
AUBES4293	1743	235.077	11	44.511	TGGTGAACAATGAGTGTCAGG	ATAGCCGGTTGTGCTTCTTG	002B2A09
AUBES4292	1732	250.298	26	40.794	GCCATGAAAATAAAGCCACAT	TGCCATTAATCTCTGTGAAAAAG	023A1E05
AUBES4291	1704	302.725	26	0	CGACGGACGAACTCCTATGT	TCCAGTCGCTTACACTGAGC	063A2C02
AUBES4290	1697	268.901	23	84.483	TTCTTCACAGCAGGTCGTTG	ATGGCTATTTGGAGCGTGTC	039B2D09
AUBES4289	1697	268.901	23	86.175	TCTTCACGTAGGGATGACACC	CTGGAGCCATATTCGCAGTT	031A1G02
AUBES4285	1662	319.637	18	37.03	GGTCTTTTCTAGATCGGTGTGG	TGCTACGTGGTTTGACCTTG	064A1H11
AUBES4284	1851	404.197	25	59.994	ATTTCAGCACCTTGGAGAGG	GGGATGTGCCACTAGAGACC	030A1E12
AUBES4283	1824	221.547	20	57.622	TTGTGTTCATGCAGCATAAGATT	TGACAAACACAGATGCCACA	109A1A12
AUBES4280	1684	390.667	9	9.017	TGTTTAAAGTTGAAGTGAATGGAG	TCCCAAAGACTACGTGCAAGA	038B2B01
AUBES4279	1668	250.298	17	6.002	TTTCAGATGACACCAATTTCAA	ACAAAATCAGCAGGGGATCA	005B2F10
AUBES4277	1632	385.594	28	80.647	TTGCTGGCTTTGCATCTGTA	ATTGTGCATGGTTGCTCTGA	096A2H08
AUBES4276	1591	273.974	4	57.977	GAGTGTTCTTTGCTGCCGTA	ACATTCTTTCAAGGGCTCCA	098B1F05
AUBES4275	1589	405.888	28	70.643	GGTTTGTGCAGGCATAGAGA	CCTCACAGGAACACATGCAG	036B1D07
AUBES4274	1565	311.181	9	9.493	CAGTGGTACTCAAAGTGGGATG	GCTGCCATAGACACCCTAGC	001B1D09
AUBES4271	1438	365.299	3	65.579	GGTGAAGGCATGGAGGTTAC	GACCTCTGCACCTTCCTCCT	014B1D11
AUBES4270	1431	444.786	4	59.64	CAAACCTGTGTGACTGTGAGC	GAAAGTGAGGGCGTGTCACTA	048A2A05
AUBES4269	1414	422.8	2	47.626	AGTGACGTCATGCTCCGAGT	ATGCCCCCATTACTGTGAAC	051A2A09
AUBES4268	1378	417.726	2	1.911	GTGCACTATCTGCCAGCATC	CGTCACTCGTCACACTTAGC	001B1F02
AUBES4266	1370	348.387	23	0.571	AGCTGCCACTTTCACTTTCTG	CAGCTATCGGATCCCCATTA	050A2C07
AUBES4264	1354	602.067	13	81.24	TGTCACACTGGTGTCAAGAGC	ACGGTCTTTGGATGTTGGAC	104B2G03
AUBES4263	1331	355.152	1	25.596	TGATGGACACTCCTCATGAAC	TGCATGTCTGTCAGAGCAAGTAT	013B2H05
AUBES4260	1253	373.755	18	25.217	GCTAAAACTGCGCTCACACC	AGCGGCACATAGATCAGTCC	049A1D06
AUBES4259	1249	228.312	19	63.974	TCTCAGATTCCCCAGCTCAG	TCATTCCCTCCAACTGCTTC	018B1E06
AUBES4257	1223	412.653	4	55.672	CCACTCACCTGTGCCTGAAT	CTCCACGCACACAGAATATGA	030A1C12
AUBES4255	1202	292.578	28	70.004	AAGAGATGGGTGCTCAGCTT	GCCAGCTCATGAAGTGTTTG	029A1B01
AUBES4254	1186	285.813	3	63.645	CTTATGTTGCTGAGGAGTCTGG	TTGGTTAGGGGAGGTTAGCA	031A1G04
AUBES4249	1156	290.886	8	51.1	CTTACGAAGCAGGCGAGAGT	TGCACGAGACTACAGGAGGA	080B1D05
AUBES4247	1127	346.696	6	41.769	CAGTCATGTCAGGAGGGTGA	CTTTGATGTCCAATGCACCA	011A2C06
AUBES4244	1044	223.238	5	37.511	CTGTGCATGAGGCAGACATT	ATGGCTCCATCCATCCAGTT	047A2H08
AUBES4243	1014	407.579	7	67.679	GATCCGCTCTTAGACACGAGA	TTGACAGTGCGGTAAGATGC	025B2G11
AUBES4242	1012	306.107	17	5.291	CGGCCTCTATAGGCGAAATA	AGGAGATTTCCTCCCCTCAT	072B1E11
AUBES4241	1053	294.269	19	31.584	CCAAGCCCAAGCATAATGAA	GCCATGTGGAACCTGAGAGT	087B1B11
AUBES4240	924	294.269	15	33.587	GCAAAGACCCCACTTCTGAG	ATCGGCAATTAACGGCACTA	110B2H01
AUBES4239	923	209.709	26	31.68	CAGGGGATTTGTCCCATCTA	TTGCCCATAACACAGGGTCT	021A1D08
AUBES4237	873	221.547	20	55.558	CACCTGTTTGGTTTGACTGG	TTCAGACTTCCTGCTTCCAA	006B2D09
AUBES4236	873	221.547	20	55.481	AATCGCATGCAATCATAAAGTG	ACACTCCCTGAATGGGACAC	060A2B01
AUBES4234	833	410.962	16	74.208	TGAGCTTGGATCAATGTATTCC	TGACCCCTAAATCATCCCCTA	011B1E06
AUBES4233	828	211.4	12	40.493	TTCGTGACTTGAAAAACAGCA	AATTTCGTGCGAAGCCTTTA	107A1G04
AUBES4232	828	211.4	12	38.716	GCATGTTCCTTTCAGCCTTC	CTTACAGCCCTCCAGCAGAG	107A1G04
AUBES4231	826	370.373	11	42.921	TTCTTTCTCTCGCAATCTTCCT	ATTGTCCTCGCTTTGGAAAA	058B1B06
AUBES4230	760	277.357	26	34.194	TGCATGGAGGAGTGAAGTTG	AGGGTGATGAGAAGCAGCAG	075B1G11
AUBES4229	743	258.754	8	42.825	GACTGCATCTGCACCAGCTA	TCTCGATACTTTCTCTTTTGCTCTC	023A1C08
AUBES4228	679	265.518	3	74.48	GAGCTGTCTGCACCTAAAGGA	TGGTGAGACAATTCGCAAAG	108A2D09
AUBES4226	660	260.445	10	11.017	CTGCTGGAAGATCCAACCAC	GCAGACCACCATGACATCAC	023A1B10
AUBES4225	629	277.357	12	47.139	CTGGAAGATAATGGCCGAAG	AAACACAGCATCTGCATTTGA	005B1G10
AUBES4224	528	385.594	19	19.002	CTTTTTCCCAAATGCCACTG	TTCATGCCATGTTTCCTGTG	108A1A12
AUBES4221	513	275.666	29	36.246	CAACCTACCGGGATTTCTGA	CTCTTGGCCATCTTGGTGTT	077B2H05
AUBES4220	1621	487.066	26	49.816	GTAAGGCATGCACAAACACG	TGCACACAGTCTGTCCAAGT	047B2C09
AUBES4218	1621	487.066	26	48.791	ACAGGCAGTTTAAAACCATTCC	CCTTCCACCTTCCATTTTTG	013B1E02
AUBES4208	648	338.24	15	41.832	GCATGGAGACACTGATGGAC	TGCAAATTACAAGGTGATTCCA	069A2D05
AUBES4200	449	468.462	23	0.571	TCAGGCATTAGGATCGCTTT	ACTGCTGTTCTGGAGCCAAG	087B2A04
AUBES4194	360	416.035	26	48.691	GCTGAGAATTAGCCGCACAT	ATGACAGCTGGCGTAACACA	110B2F05
AUBES4192	360	416.035	11	78.713	TTCCCATGAAGGTGACTCGT	CGCAGCTGGAGTAGTTCCTT	013B1A04
AUBES4185	231	581.773	17	5.272	GCCACAGATTCCTCCTGAGA	GGACCAGACGTGCTCTTGTT	084A2F12
AUBES4183	168	380.52	18	12.646	GACTGCAGGACACCCCTTC	GCACTTATTGCTCATGCTTCC	109A1B04
AUBES4182	168	380.52	18	25.715	ACCGACTCATGACCTCACAG	CCGAAGAAATCGGTGGTAAC	082A2E10
AUBES4180	81	585.155	25	38.625	GCTTCTGTATGCATGGACTTCT	AGGGATTGAGATTACACGGAGA	108A1A05
AUBES4179	81	585.155	25	47.337	GCAGCTCTGAGAGTCCTTCC	TGACAACGGCAAAATAGACAA	103B2A11
AUBES4170	1693	495.522	2	3.781	AAATCGGTCGGTTCACTGAG	GGGCGAAAGACGTAAAGGAG	110A1D08
AUBES4166	1532	449.859	9	8.485	CGCACATTTTGAAATCTCTCC	TTTAATCGTGTGTATTTGAGTATCG	058B1A07
AUBES4165	1514	444.786	2	16.713	GCTGCTGCCAGTTTATGGAT	CCTTCATGCCTCATCACGTA	109A2F02
AUBES4163	1513	449.859	2	41.879	TACATGTGGCTGGAATGCAC	CCTGTGTCCAGGTTCTCCAG	046A2D02
AUBES4162	1513	449.859	2	38.976	GTGCCCTTTGGAAAACTGG	CACATGTTGGAAGCAGACCA	045A2F12
AUBES4155	1324	334.858	14	52.903	TTCCCCTTCCATTTCTCTGTT	AACAGATGCTGAAACCAAAGC	093A2E09
AUBES4154	1324	334.858	14	55.959	CGATCGAATTGTCTGTCACG	CCTATGAAGGGAGCCAGGAT	053A2G09
AUBES4150	1246	571.626	13	88.744	ACAAGGAAAAGCTCAATCGAA	GCAAACATCAGGAAATGAAGG	021A2F08
AUBES4149	1246	571.626	13	90.27	CGCCTACCAAATTCACCTTC	CCTACCCAAAACATAGCCACA	067B1C03
AUBES4148	1229	255.371	23	26.546	GAGAGCATGGCCAACAACAT	TTGTCAGCAGACAGGTAGGC	095B2D06
AUBES4147	1229	255.371	23	26.546	TGTGTATTTACAGCCAAAAGCA	GGGAAACATGTTAAAATTCTTGTCT	086A2C08
AUBES4144	1182	302.725	6	39.001	GGATATCTTTGAGCAGCAGGA	GAATTGCCGAACAAATCTGG	101A1B11
AUBES4143	1182	302.725	6	39.642	TTGGTTTCAAGCCGCTTAGT	AGAACAGATGGGGTGGTCCT	094A2A04
AUBES4142	1123	568.243	25	19.811	GAATTCTGCCCATTTCTGGA	ACTGGATGTGCCGGATTACT	086B2A08
AUBES4141	1123	568.243	25	12.061	AGATCAACCGCTTCCAATCA	TCCATGAGTTCTTCCGCTAAG	012A1B08
AUBES4139	1122	186.032	1	25.673	CCCCACTTCCAGACTATTCCT	ACCATGATGAAGCGCTAATG	075A2E08
AUBES4138	1073	226.621	12	48.754	TTCTCACAGCCTTCTTTGCTC	CAGCTCCAGTTTCCTGGTTC	023A2D06
AUBES4137	1040	363.608	23	23.83	ATACACATCCTGCCCTCGAT	CACTGTTCCTGCCTTCACAT	068B2C07
AUBES4136	1040	363.608	23	25.584	TCAGGGGAAATTATGGCAAG	TGGCAGTGCTTTATCCACAC	068B2A07
AUBES4135	986	253.68	7	70.664	TTTGTCTTGGTCGTCTTGGTC	CCAGTGTTAAAGACAATGTTGACG	076A2H10
AUBES4134	986	253.68	7	68.898	CAGAGACCAGCACAAAGACG	CAGAGGCAGACCCATAACCA	011A1A05
AUBES4132	982	284.122	23	25.153	CACTGGGGTGGTATCCTCAT	CCACCTCGGCAGTACTTTTC	062B1C09
AUBES4130	972	219.856	26	50.316	CTTCATTGATTTGGCAGATTGA	CCAGTTCCTATGTCTGGACTCTG	002B2A06
AUBES4127	961	250.298	5	63.988	GGGGACTTCTTATGGCCTTC	AAATAGTGAGATAATCACCTGAACAC	023B1H07
AUBES4126	905	370.373	8	38.86	TCTGCTTTGTTGGTGGTAAGG	TGCCACAAAAACACATCCAT	107A2G07
AUBES4124	818	338.24	15	33.902	AGCAACAAATGGGGTGACTC	TGTCTGGACAAAGGATGTTCA	095A1F07
AUBES4122	83	223.238	7	69.01	GCTTTACATTGACCTCGCTTG	TGCCCTTACTCACTGAAGTGTC	078B1G02
AUBES4119	1558	424.491	29	34.636	TTCACAGGTGGGTGAAAACA	TTTCTATCCGCCAGTTCCTC	059B1B10
AUBES4118	1534	434.638	13	94.65	CCGTGGAGACTCCTTTCAGA	GAAGTCCACTTCAGCCATGT	067B1D09
AUBES4116	1465	483.683	23	47.843	GGGCACATGTGGTAAAGAGG	AGGGAGAGGGATGGAGAGAG	011B2F08
AUBES4115	1465	483.683	23	48.044	GGGAGGGTTAAAGAGGGTGT	GATCCTGCATGAGTGTCGTC	081B2H09
AUBES4113	1419	317.946	23	25.153	CATCCTGGCGAAGCTCTTTA	CCATGCGAGGCCAGTAACTA	110B1G04
AUBES4111	1386	317.946	2	45.362	TTTGCGTTACAGCAACATGA	TAATGCAGCCCAAATGTGAT	065A2D06
AUBES4109	1377	263.827	27	44.398	ATTGGGGTAGAGGCAGTTGT	CCTGGAACCATATTGGCATT	010A2F12
AUBES4108	1369	326.402	6	39.091	ATCCCGCAGACACAGAGAAT	CTACAGACATGCCGGTCTCA	078A1C02
AUBES4107	1281	250.298	27	34.414	GCATATGCCTGCACAAAGAG	GTGGTGACATGCTGTGAATG	109B1D02
AUBES4103	1099	405.888	29	52.842	GCAGAAGGAAACACCACCTC	CCCCACGACCCTGTGTACTA	109A2A08
AUBES4101	1073	226.621	12	48.754	TTCTCACAGCCTTCTTTGCTC	CAGCTCCAGTTTCCTGGTTC	023A2D06
AUBES4099	1037	226.621	1	25.574	GCACTGAGGTTTCAGTGAGC	TCTCTGCCTCAGACCGACTT	011A2A05
AUBES4098	1016	404.197	7	70.376	TGAACTGAACCCCCAGAGAG	TGAACAGGGAGCTGAACTGA	052A1H01
AUBES4097	1016	404.197	7	70.145	GCCACTTTCTGATGGGACAT	TGTCATGCACAATGTGTCAACT	034B2B11
AUBES4096	1001	280.739	21	41.109	TGATTGATGGGCATATTGTAGG	CATTAAATGCACGCAGTTGG	046B2E04
AUBES4095	1001	280.739	21	36.792	CACACGCTGCACACAATAGAT	TCATTGCTTTTGTTCGATGC	006B2C06
AUBES4094	975	258.754	22	20.261	GCCGCTTACTTCAGAGAGCA	CAGGTCCAGCATTCAATCAG	003B1D03
AUBES4087	1886	473.536	25	53.887	CTGGCCCTTTAATTCAGCAC	CTGTTGTGTGGAACGGTGAC	084A2H02
AUBES4086	812	470.154	8	36.746	CCTGGTTTTAAAAGCGCAAC	TCATTACAACGCCATCCTGA	088A1E08
AUBES4084	787	170.811	4	57.934	GACAAGACGATTTAACGCAGTG	CCTCACACTCACCACTCAGC	061A1D12
AUBES4083	787	170.811	4	57.977	GACAAGACGATTTAACGCAGTG	CCTCACACTCACCACTCAGC	036A2F12
AUBES4082	773	311.181	13	48.95	GGACACACTGGGCTGAAAAA	CATGGCTGACAAGCAAATGT	021A2B03
AUBES4080	765	311.181	9	17.095	CACCATCAAACACTGGCATC	CCTCATGCCCTGAAATATGC	003B1C01
AUBES4076	716	417.726	1	4.685	CACGCTTACTTCGGACAGTG	AAATCTCTCCTCGCCTCCAC	060B1H12
AUBES4075	689	279.048	8	51.394	AGTGGGGAGTCCGAGAGTTT	GCTGCTGATTAGCATATCACTTG	077B2B10
AUBES4071	557	365.299	4	58.048	GGTGTCGTCCAGAAACGAG	GTCCCAACTTCCTGTTTTGC	058B1E04
AUBES4070	557	365.299	4	58.048	GGTGTCGTCCAGAAACGAG	GTCCCAACTTCCTGTTTTGC	006B1G04
AUBES4069	546	366.99	12	37.145	AGTGAATCCTCAGGCCCATA	TTGGGGTTGTAATTGTCAGC	111A2D04
AUBES4066	492	219.856	12	67.891	CGCTATTTGAGTGGCCAAAG	TGGCCCAGTGAAAAACTCTT	084B2G01
AUBES4064	459	250.298	20	55.58	AGAATTTCTCCGGCCTTCAC	CTCACGTGGATGAAGTGTGC	065A2D12
AUBES4063	445	341.622	16	111.596	TAACGGTTGTGGGAGGAGAC	GGAGTTGGGGAGGTCAGAGT	006A2C12
AUBES4062	437	257.062	28	63.24	TGGCCAGGATGAATCAATTAC	CAATGTTCTGAAATGACCCAAA	086B2F11
AUBES4061	437	257.062	28	62.032	CTGGCCAGGATGAATCAATTA	CAATGTTCTGAAATGACCCAAA	078B1B08
AUBES4060	409	421.109	9	16.183	GCTTCTCAAACACTCCTCAGC	AGGGAATCGTTACGTGCTGT	023B2G08
AUBES4058	359	309.49	27	13.685	GCACAACAGTGAGCGATTCC	GGTTTCGATACGGAGCGTTA	035B1C05
AUBES4052	137	297.651	5	44.767	ATTGGCATTTTGAGCCATTC	CAATGCCCAATTTGTACGAC	104B2A05
AUBES4051	133	289.195	18	32.94	TTGTGTGCAATTCAGGAAGG	TGGATATTTGGGACAAAAAGA	087A1G07
AUBES4049	1522	253.68	6	41.295	CCATGCTGACATCACAGGAG	TCAAAGCAGTCGGTCTGATG	038A2D07
AUBES4045	1512	241.842	20	56.037	TGCCTACTCTTCCTCCATGTG	AGGTGTGCGGTGTGGATAAT	039A2G10
AUBES4044	1504	331.475	3	65.628	TGTGTCATGGCTCACACTATG	GTTTCTTTGAGGAGCGCTTG	086B1H07
AUBES4036	1415	290.886	4	57.625	CCTCTTTCTCAAGTTGGTTGG	CGAAGTCAGGGACCAGAAAC	045B2A08
AUBES4035	1402	273.974	5	47.101	CCACTCTGACATTCCCACAG	TGGGTTTGGTTTGACCAGAG	058A2F06
AUBES4034	1360	287.504	19	43.874	GCAGTTGGGTGTGGTTTCTC	ACTGCTGCCAGTGTGAAATG	083A1C05
AUBES4032	1351	245.224	23	53.445	GACTCCTGAGCTGGTCTTGG	ACGGTGGAAGCAACTGAGAG	105B2C03
AUBES4031	1351	245.224	23	60.747	CTGCGGCATAAAACAAAATG	GTGGTATAATCCGCAAGAACG	062A1G09
AUBES4030	1349	345.005	15	51.582	CAGTTGCCTCACACTTGAGC	CTCTGTACCGCTGCATCTGA	104A2F05
AUBES4029	1348	285.813	25	59.928	CACGTAGGCGTAGATCGTCA	TACGTGGACCATAGCCTTCC	104B2G08
AUBES4028	1348	285.813	25	59.997	TCTCTGCATCACTGCGAAAT	TTGACTTGGCCTCCAAATTC	007B1B04
AUBES4027	1343	326.402	28	57.746	GCATTGCCGATCAGATTACA	CCATGCAAAAATGCTTTCCT	077B2A01
AUBES4026	1341	273.974	22	0	TTTACTGGCCTCCAACTGGT	GATGGAACCCCATCAGACTC	052A2E09
AUBES4025	1341	273.974	22	0.122	CGGTCCTCAACCACTACCAG	GTATGGTGTCCTGGCGAAAT	108A2F04
AUBES4024	1291	279.048	5	44.517	ATCCAGAGGCAGTCCTGGTA	TCTGGTTTCCTCCCAGTGTC	076A2A11
AUBES4022	1283	358.534	1	24.766	GAGCCTATCCCAGGGAACTG	TTACGGGGTTTACCTTGTGC	091B1F06
AUBES4021	1273	267.21	20	4.134	ATTGGGTGCGTGCTATTTTC	GGTAGGTGGATTGGCACTTG	045A2C02
AUBES4020	1273	267.21	20	5.597	TGAACCCATTTTGCACAGAG	ACCATTTACATGGGGGAACA	030B1C07
AUBES4019	1262	485.374	20	41.833	GGTGTGTGAACAGCACAAGC	AAACCTTTTCACTGCCATCG	004B2A11
AUBES4017	1221	312.872	13	16.645	GCCGTCTCTGGTTTTATTGC	AGCAAGACCACATGTGCAAG	040A2H02
AUBES4012	1191	267.21	1	14.666	TGTAAGCTCCATCCCCAGAG	TCAGATGAATGGACGAGTGC	042A1C05
AUBES4010	1169	260.445	23	25.153	GCAGGAGCCTGTATTCTTCC	TTGCCTCCAGATGCTAAACA	032A1D12
AUBES4009	1150	160.664	17	5.291	TCATCCCATCAACTCTGCTG	GATCCTGGTGGTGTCAGAGG	063A1C02
AUBES4007	1131	251.989	13	48.937	GAGGATGAGGACTGGCAGAG	GAGGTTGCACACACACACATC	075B2E04
AUBES4006	1131	251.989	13	55.133	CACGGGCACAGAAAGGTATT	TGGTGTTTGCTTGATTTTGC	084B1F03
AUBES4005	1113	282.43	19	41.86	TTGTGATGTGGTGTAAGGTTCC	TATCATGGGCAATGCACCTA	075B1D12
AUBES4003	1098	282.43	6	40.197	TGACCTTTTCATTTGTGATGATG	CTCCTGAGCCTTGACTCCTG	075A2B05
AUBES4000	1080	345.005	8	78.625	TTGTGACCTTAATCCACACTGC	CAGACCTCAGAGACCAGCAA	084B1F07
AUBES3995	2151	268.901	2	64.87	TCTTTTCGTAATAGTTGCGTCCT	AAAGAATGAATTGGGGTCCA	053A2F06
AUBES3993	2142	351.77	1	37.825	CCAATCAGGACATCCACCAT	GACGCCCGCAAATCATATAC	087B2A02
AUBES3992	2142	351.77	1	39.782	CCAGCCATAATCACTGTGGA	AGGGAACACCATGATCAGTACC	008B1G02
AUBES3991	2126	328.093	18	43.313	GTTGAACGTTGCTGAAATGG	TGCAGTTTTCTCCCCAAATG	106A1C05
AUBES3989	2051	412.653	12	85.523	GATCCGAGAGAGGGAAAAGC	TAGCGCTGGAGCTAACACTG	024B2A01
AUBES3988	1998	284.122	2	45.071	GGCTAGGCCCAAATAAAAGG	TCAGCAGGGGATCAAATACT	052B1H07
AUBES3987	1955	246.915	14	30.442	GGAGATGGCCGAATATAAAGC	ACGTCTGCTGCTTTGCTTCT	049A1F02
AUBES3985	1897	326.402	25	59.236	CTTCCCCAGTCCAAAGACAC	GGTGGAATCGACACAAGGAG	096A1H08
AUBES3980	1798	432.947	10	73.455	GAGGTTCCACACTGGCATTA	ATGCCTAGCCTTTCACTCCA	079B2C09
AUBES3979	1788	348.387	19	27.418	AGCCTCTGACTTTTCACAAACA	AAATGGCTCTCCTCCAACAG	001A2F12
AUBES3978	1777	323.019	2	45.077	AGAACAACGACCAGGGACTC	TGTGGACTTGTCTTGCGAAT	001A1G07
AUBES3977	1769	160.664	29	36.246	TGATGGAGTTCACCAAGTTCC	CCAGCCAATCAGATTCCACT	019A1A07
AUBES3975	1731	226.621	7	57.196	CAATGTCTCATTTGCACAGC	TTTGGTCAAGTCAAAATGATGAG	077A1E08
AUBES3972	1695	304.416	21	61.949	ACCTCGGATAAAGCAAATGG	TCATGTTTTCCCTCAGAGGAC	105B2E05
AUBES3971	1695	304.416	21	62.906	GACCCATGATGCACTGAAGA	CAGCTGTGTAGCACGTTTACC	090A1H02
AUBES3970	1686	162.355	9	8.914	CCTGCAATGCTACAATACCG	TCCAAATGAATGGATGGATG	005B2E10
AUBES3969	1657	279.048	7	69.685	GCAGGGAGCATGTTGCTAA	TCGCTACAGCTCAGAACGAA	112B2F07
AUBES3967	1673	497.213	12	47.075	CACCAGCACAAACAGAGCTT	TTTTGGCCTGGTTAAAAGACA	087A2C07
AUBES3965	1602	289.195	15	32.983	AGCCTGGCTCTACACTGGAC	GAACCTTTCACCGCAATGTC	086A2B10
AUBES3963	1528	280.739	7	41.049	TCTGTGAATGATCCCCATCC	TACAGACTCGATCCCCTTCG	053A2F07
AUBES3959	728	766.114	27	40.242	CACTGGTCACAGGGGGATAC	CACAGTGCTGGAGATGTTGG	102A1B03
AUBES3957	704	524.272	14	75.951	ACCTGATTGGCCCTGAGAC	ACCCTCGGACATATCCATCG	083A1C12
AUBES3956	582	757.658	28	36.184	TTGCGATATCCGTAAGTCATGT	GCCGTACAAAGCAGCTCATC	075A2E04
AUBES3955	530	488.757	6	41.031	TTCTGTGCACACGATACCATC	TCACATTGCACAGATGCTCA	014B2B08
AUBES3954	530	488.757	6	41.865	AATGGCATCTTCTCCATGCT	GGATGCATTTGCACAGTGTC	003A1C12
AUBES3952	343	661.259	2	20.585	AGCGGATGGAAAGCTCTAGG	GGTCCGATAAATAGCCAACG	096A2E11
AUBES3948	212	519.198	21	9.947	TTGACCCCCGTTCTTTTAAC	CCATTCGCTCAGATAGGAAAA	038B2A03
AUBES3947	180	889.571	17	5.88	GCACACAAGCCTAAACATGC	CCCAAACACCATAACAAGGAG	008A1C09
AUBES3946	150	361.917	1	23.043	CCAAAAGGCGTTCTAAGCTG	CCCTCCAAAAACATTGGAAC	014A1G10
AUBES3944	146	273.974	24	69.102	CCAGATCACTCAAAGGTCCAG	TGAATGATGGGAATGTCTGA	031B2F11
AUBES3943	111	461.698	10	79.502	GTTAATGCCGACGCTGTTG	TTTTAAAGTTTGAAGAATTTACTGCTG	029A2G06
AUBES3942	111	461.698	10	76.966	TGTTGGTGGTGCTAGAAGGA	TTCTTGGGGGATTGTTCTTG	075A2E01
AUBES3940	95	365.299	5	70.037	TCTGGAACACTCTGCCATACA	ATGTCCGAGGACTCATTTGC	019A1F04
AUBES3939	89	387.285	10	69.218	AAAAAGAAGGGTGCTAAATGGA	ATGCGCATAGGACATTGACA	069B2D05
AUBES3938	76	463.389	15	32.778	GTGGTGGGGAAGGTCTGTAG	AGTGAGTATGCCCCAAGAGG	061A1D11
AUBES3937	76	463.389	15	28.013	GGCCGATGTCACTCTGAATA	ATCAGAGTTTGCGGAGATGG	095A1A04
AUBES3934	1362	231.694	6	39.06	TCAGGCTGCCTTTGTTTTATG	GCATGATGAAAAAGTGGGTTG	026A1F04
AUBES3933	1359	270.592	19	47.609	AAGCCTGCAGCTGTTAGGAG	TCGGAAAGGAACAGAAAACG	029A1A11
AUBES3932	1344	314.563	14	48.042	TACTGGCAGCTTCGGGTAAT	TGCTGACATTGGAGACTCCTT	072A2F10
AUBES3931	1338	490.448	24	12.919	TTCGTGTACGAGTGCCAAGA	CACTGCTCGGGGATGTAACT	074A2C10
AUBES3927	1243	292.578	21	11.954	TTGTCCCACTTCTCCCACAC	TGGAGCTTCAGGAGAAGGAG	002A1G12
AUBES3926	1225	399.123	24	36.552	GCTTCACTAAGACGCCCTCA	TCTTTCCAAGCCTCATTTCG	047A2H06
AUBES3925	1166	345.005	22	40.432	CCTCTCATGCTCCCATGAAT	CGTGATCGGCTCTATGACAA	104B1E08
AUBES3924	1165	208.018	17	5.291	GCCAAGGACCACTCAGAAAG	TCCATTGGTTGAGTTCCAGA	096B1D10
AUBES3923	1163	365.299	1	25.713	TGTCAGCAAAGCCAGATGTC	TATGGGGTGGGGTGTAGAGA	075A2E03
AUBES3920	1147	260.445	25	58.052	TCACGTTCCCCTACATCTCA	GATGGTGGACAACAACAACAA	112B2G09
AUBES3919	1145	279.048	16	72.296	GTACACCCTGAAGGGCTTTG	CAGAATTCAGAAAGGCTGTGC	008A2A10
AUBES3918	1010	385.594	27	40.702	CAGAGCAGAACACAAGGGTTT	AGGAGTAGTGGGGCTTTCCT	062B1C04
AUBES3916	1111	258.754	22	67.37	TCATCATGTGCTTGCTTCCT	CACACCGGTTCTTTCAGGAT	079B2H08
AUBES3915	1079	329.784	16	66.301	TGACCCTCTACTTCCCTCCTC	TGAAGACGGACACTGGAACA	106B1C04
AUBES3914	1075	230.003	11	44.843	TGATCACTGCAAAAACTGTTCC	TGAAGGCTGAGTTGGTTTCC	005A1G12
AUBES3913	1070	255.371	3	75.402	CAGGAGTGCTGGGTATGAGG	TCTCCCCGGGTTTTCTCTAT	062B1F09
AUBES3911	1049	267.21	26	50.551	CACAACTCAGCAAGCACACT	GCTGTGTTGCACAGGCTTAT	068B2H04
AUBES3910	1043	165.738	24	16.066	CCCTCTCTGAAACCCAGCTA	GAGCACAGCCTGAGAAAAGG	030A1F04
AUBES3909	1029	360.226	20	8.947	TCTGCTACTTGCTACTGCTGCT	TTCCCTGAGAAGGAAACGAG	038A2A05
AUBES3905	942	213.091	20	51.154	CATCTTGTCCGGTTTTGAAGA	ACATCGGGAAGTGACAGTCC	040A2B04
AUBES3902	915	218.165	24	14.374	ATGGCATGAGAACATCAACG	GGAATCACGGGAAGACGTTA	036A1A07
AUBES3901	842	231.694	25	61.574	CAGATTGTGCCTGCTGTGTC	TGAGCTGAAGATATTCACAGGA	058B2H01
AUBES3900	2630	204.635	6	41.043	AGCAGCAGCACAATGCATAA	TCCATAATCCCCCATTTCTTC	100B1B06
AUBES3899	2630	204.635	6	41.072	CTGTGCAGCCCAACATGA	GGGACAGAGAGGCAGAGAGA	068A2D11
AUBES3895	1604	223.238	3	38.588	TAAATGCAGGTGTGGACTCG	AAGCGACAAACTAGCAAGTGAA	038B2A08
AUBES3892	1455	338.24	6	41.044	TGATAGAACTGGAACACACAAATG	CTCAAAAGCAGGATCCGAGA	106A1A08
AUBES3888	1288	241.842	28	28.383	ACGCAGACAGAGCTTCCAGT	CCAGCCCTTAGCACATGTTT	046A1E05
AUBES3880	919	275.666	3	66.214	CAGCACTCTGCTCTCGTGAA	GCCCCCTCACCTCAATAAA	096A1A03
AUBES3879	919	275.666	3	65.543	GCGACTGAGGGGAATAATGA	ACACACACACACATGCTCGT	045B1E12
AUBES3878	913	424.491	5	59.505	CCATGGAGCTCTGGATCTGT	CCGTTTTAACATTGCAAGACA	062A2C10
AUBES3875	869	502.286	15	6.501	GGCCAGCGGTTTCTTATACA	CGTTCATTTTGCTGAACGAG	075A2D06
AUBES3873	869	502.286	15	6.5	ATGGCCAGCGGTTCATATAC	CGTTCATTTTGCTGAACGAG	032B2C11
AUBES3872	801	558.096	11	44.298	TCAGGCCAAGGTTACCAGTC	TCCAAACAGAGGAGGCAGTT	090B2G11
AUBES3871	801	558.096	11	44.793	ACATGCCGACAATTATTCCAG	GCTTATCACACGCGCTCTTT	090B1A10
AUBES3867	801	558.096	11	44.267	CTGTTACAGCTGCGAGATGC	TGCTGCCTACAAGTGACAAAA	032A2E08
AUBES3866	677	360.226	11	48.767	CCCCACAGTTGGTACCTTTG	TGGCTCTCAACGAGAACTTG	082A2E11
AUBES3861	342	272.283	16	73.29	CAGATTCAGTGTGATGGTGGA	GTACGGGGACAAATGCAATG	034A1G04
AUBES3858	71	468.462	2	42.394	AACAAAGCTGGCTGGGTATC	TGATGAGTGGGCCACATAAA	084B2D07
AUBES3855	3491	158.973	8	46.13	CAGTTTGCCTGTTGCTTTCA	TTTTTGGATCCCCACTCAGA	018A1B08
AUBES3854	3420	260.445	29	29.559	TACAACTCGCTCACGCACTC	AGTAAACGTGTCCCGGTTTG	050A2H04
AUBES3852	3026	224.93	6	41.06	GCGAGAGGGAATAAATGCAG	GTTTGAGCAAAGCCTGATGG	085B1F06
AUBES3847	2697	202.944	23	5.643	TACCTTGCATGCTGGCTTTC	ACTCCGCCTTCTGAGGATTT	073A1E09
AUBES3846	2654	368.682	6	41.32	CATTGCCAGAACCTCACAGA	GCAATTGTGCATTGATCAGC	042B2D03
AUBES3845	2533	158.973	6	41.07	CATTTCGATCCAGGGTGTTT	CAAATCTGTCGGGCTTGACT	111B2D04
AUBES3844	2533	158.973	6	41.786	GGATAAGGACGTCTGCCAAC	GGTGCAAGGAAAATGACAGG	024A1A04
AUBES3839	2257	316.254	20	50.949	CGGTTCTGTGGCTTCATTTT	CAACGAACGGCTCCATATCT	035B2D06
AUBES3837	1975	194.488	11	44.979	GAGTGCACCCGGCTTTAGTA	TTGGCTCTTAATGCTCTGTCC	090B1G09
AUBES3835	1919	311.181	15	44.685	GTTGGCATTGTACACGTTCG	CTTTTCACGGAGCCAGATGT	111B2D10
AUBES3833	1881	316.254	9	5.832	AAAAACCCCCACAACAACAG	GTCCAGCTCAACTGCAGGAT	076A2H04
AUBES3831	1881	316.254	6	44.722	GGTGGAGACTGAGAGGCAAG	CACCTGAGGCAAACACCTCT	003B2D11
AUBES3824	1816	279.048	6	41.279	TTTTTGGAGTAGCTTCTTAGGATATGA	TTCCACCCAAATGAGACACA	013B2B04
AUBES3823	1802	243.533	6	43.899	GCTCGATATGACTGACTGGATG	TTTCAGGAACAGCTGAAAAATG	026A2D06
AUBES3819	1684	390.667	9	6.59	CCCACATTATGCCTTCACG	TAAACTCTGCAGCCTTCCAA	105A2E09
AUBES3818	1684	390.667	9	8.951	TGTTTAAAGTTGAAGTGAATGGAG	CCCAAAGACTACGTGCAAGA	038B2B01
AUBES3817	1584	268.901	9	11.876	GAGCAAAGGACAGACACACA	GCTTGAAAGTGTCAATGCAAA	048B2E07
AUBES3815	1496	248.606	22	65.555	AGTTGTGGGTGGTGGTGAGT	TTGTGTCCCACCATTGTTTG	094B2A03
AUBES3814	1496	248.606	22	63.765	TATTCAGCTCCCGAATCACC	TCAGTCTTCTGGCCTTCACA	048A2C03
AUBES3813	1496	248.606	22	66.265	AGTTGTGGGTGGTGGTGAGT	TTGTGTCCCACCATTGTTTG	003B2D06
AUBES3812	1468	410.962	6	39.981	GCCTGCTGAGGGATATTCAC	GGCAAATGGGAAGTGAGAAA	027B1A08
AUBES3809	1310	240.15	6	40.398	CGAATAAGTAACATTTTACACGTATGG	TTGGTTGGTGAGTTTCTACCTG	109A1E10
AUBES3807	1148	202.944	22	67.843	GCAAATGGGTTTTTATCAGCA	CCCAACCACAACAAGATCAA	107A2B10
AUBES3806	1058	366.99	6	25.117	TGTGACCCTTTTAGAACGATG	AAAAACAAACCCAACAAGCA	102A2D06
AUBES3805	1058	366.99	6	25.962	TTTTCTCCCACCTGCTGAAG	AGTGAGTGAGTGGGCTTCGT	071B2E09
AUBES3804	1058	366.99	6	25.113	CCTGGGTTTAGACTGGAGGA	TAAATCTGCGCTCGGCTAAT	046B1D06
AUBES3802	1029	360.226	20	5.868	TCTGCTACTTGCTACTGCTGCT	GCGTGACCGGTATGTGAAG	077B2D08
AUBES3801	1029	360.226	20	5.596	CATCGCTCAAAAGCAGACAC	AACAGTATGAAACATGCTCCAATTA	023A2D08
AUBES3799	974	260.445	6	17.187	CAGGAACTTGTATTGCGGAAG	TGTTACCACCCCGGAAATAA	020A2D03
AUBES3798	974	260.445	6	21.991	ACCAAGCCAACAGAGCAAAT	TGATGTCGCGGTGATTATTG	002B1F04
AUBES3795	808	170.811	6	41.041	TGACCTCAACAATGTATGCTCA	TTCTGACATGCCGATCTTTT	073B1E11
AUBES3794	786	240.15	6	40.815	TTCAGGATGGAGGACTTTGC	TGTTGTGGATTCCCCAGAAG	074B1G05
AUBES3793	786	240.15	6	38.099	TTCAGGATGGAGGACTTTGC	TTGTGGATTCCCCAGAAGTT	074A1G05
AUBES3792	786	240.15	6	41.06	TAACTCCGCGTTCCTAAAGC	GATGCTGGTGGTAGAGAGTGC	045B2D04
AUBES3791	645	444.786	6	40.384	TGCATTGATTCACTGTGGTTT	ATCCACACACCGCCTGTAA	070A2B08
AUBES3789	645	444.786	6	41.062	TCCCCTGTGAGACAGAAAGG	GCCCAAAAGTGGATTATCAAA	018B1G04
AUBES3788	430	328.093	16	77.272	CAACAGAATAAACGGAATCATAAAGA	CACATGTTTGGACATGCAGA	021B2C05
AUBES3785	18	306.107	18	30.439	AACAGCTGTGAACTCTCTCTGTGT	AGAGCACGAGCGTGAGCA	072A1C06
AUBES3784	1894	329.784	6	54.008	AGGTGTGAGGTGTGAACGTG	TCTGTCCATTCCCCAGAGAC	052B2C07
AUBES3783	1813	331.475	16	71.904	CTCAGTCTTGCAGCATCAGG	TTTCTCTTCCTCCTACCCCTCT	077B1D03
AUBES3782	1716	580.082	5	15.678	CCTTGAGCTCTGGAAAGGTG	TTTGTCACGTCAGCACCAGT	038A1A01
AUBES3781	1684	390.667	9	8.536	CCCACATTATGCCTTCACG	TAAACTCTGCAGCCTTCCAA	105A2E09
AUBES3780	1491	324.71	4	56.429	GCCTGCATAATGGATGGAAG	AACCCAGCTCATAAGCCAAG	027A1C04
AUBES3779	1449	395.741	17	5.291	GAGTGTTGCTGGGGTAGCAC	GGTGGGCTGTGAAATTCAGT	042A2B12
AUBES3777	1369	326.402	6	38.418	CCTGAAATTCCCAGGTAATGA	GCACCAACAACCATGCTACA	023A2H09
AUBES3775	1168	280.739	11	44.979	CCACCACCATGTCCCTTTAG	TGTGAGATTGGAAACGGTTG	078A1C07
AUBES3774	1109	388.976	6	40.39	TGATCATGGCAGCTTCTGAG	CTGTGCACAAATCATTCATGG	035A1B03
AUBES3773	1059	449.859	6	40.988	AGCCAACAATTTCCATGAGG	TTCATGTCAGCGGTTCACTC	020A1H08
AUBES3772	994	339.931	6	41.036	GGGCACTAATGAGCACACAA	TGTTAAGCCTCAGCCTTTCAT	066A1A07
AUBES3771	919	275.666	3	59.43	TAGCATTCAAACGCCCTTGT	TTTGGGCTCAAACTATCTCCA	079B1B12
AUBES3770	876	573.317	19	64.72	TCCACTTTCTCTCCTCCCTTC	TGTAAACCAGCCATGTGAGC	085A2G11
AUBES3769	661	637.582	10	47.782	CCTTTATGGATCCGGTAAAACA	TCAGTCTCCCCACTCACCTC	077B2C04
AUBES3766	552	424.491	6	41.068	CGCTTGCCAGCCTAAATTAT	CACTCGAATAGCGAATAGTTGG	078A1A02
AUBES3764	541	385.594	26	48.568	AGCACTCTCAGTCACGCTTTC	GGGATGAACTTCAGGACAGG	043A1F08
AUBES3763	529	240.15	19	57.544	TGTGAGCGAGTTTGGAAATG	TGGTGTCGTGTGCTTCTGAT	031A2H01
AUBES3760	426	350.078	4	59.761	CAAGCAGCAAAGTCTGTGGA	CCACATGGACCTTGGAACAC	061B1G06
AUBES3759	374	243.533	6	41.062	AACCAGCGGAGTTTGTGTCT	CGATCGTCTGTCATCCATTG	087B1H04
AUBES3758	373	265.518	2	42.226	CCGAATCATTCTCGGATCAC	TTCGACTCTTTGAGCCGATT	032B2A11
AUBES3757	354	334.858	21	10.526	AGAAGCCATTAGACAGAGAAGCA	ACCTGTTTAACGGTGGAGGA	004B2E03
AUBES3756	285	287.504	28	71.671	TGGTGCAAGAGATCGAAGAC	GCCCTAACCACTGAGCTACC	064B2A08
AUBES3755	141	319.637	19	40.415	ACCTGGCAACATGTGAGCAT	ATCACCAAAACGCAAAAAGC	083A2B11
AUBES3752	2239	617.288	1	40.082	ACACCCCTGCTCTGTCACAT	TGAAATTCCACAATCCCACA	108B1E11
AUBES3750	375	400.814	8	44.976	TGAATTCTTTGGCACCACAT	TCCTCACACAGTGGCATGAT	106A2F11
AUBES3749	236	794.864	8	44.591	TGGCAAAAGGTCTTGTTCTTC	TCTGCTGAACTCTCCGATGA	103A1E11
AUBES3747	375	400.814	8	42.435	AGAAGGGAGTGCAGAAGACG	CTCAGACCTGGAGGCCAGTA	102A1B06
AUBES3746	481	355.152	20	47.561	TTGCGGTTGTGAGTCAGTCT	TCTCTCGTCCTCATCCACCT	100A2A04
AUBES3745	2239	617.288	1	39.956	ACACCCCTGCTCTGTCACAT	TGAAATTCCACAATCCCACA	092B1A12
AUBES3744	9	2005.76	7	69.652	TGAGCCATGCTCTGGATACTT	TCAGAGCAACTCCTGAAGCA	088B2D11
AUBES3742	790	651.112	17	4.596	TGGTTTGTACCCATGCTTCA	GTGCTCCTGTCACTCACCTG	087B1D01
AUBES3741	744	515.816	20	16.557	TTTCAGCTCTTTGCTTGGGTA	GTGATAGTCGGGTGTCCACAT	085B1F07
AUBES3739	904	341.622	10	41.753	CAGCTCACTCGGTTCTGTCA	CAGCAACGCCTATCACACAG	082B1D07
AUBES3737	1387	647.73	27	43.051	AGCTGCATGGGCTTTCATAA	CTTTTGGCTTCCACTCAAGC	077A2E06
AUBES3736	818	338.24	15	35.082	TTTCACAGCTTTCTCTGCTCA	ACCCCACTGTGAAATCCTGT	076B2B08
AUBES3734	59	1070.53	13	48.451	GTTTCTTTCTCCCCGAGCTT	GGCTTTCAGAGTCGGAAGTG	074A1G06
AUBES3733	9	2005.76	13	49.638	TAGCTGCTGGCACTTCACAG	GTGGCCAAGGTTGTCTCATC	073B1D11
AUBES3732	1139	265.518	27	40.258	TCTCAAGCATGTGAGAAATCTG	AAGTAATCAATGCGGCCAGT	073A1D08
AUBES3731	675	377.138	29	57.534	ACGTGTGCTGAGGGAGAGAC	TTCTCACCAAATGCACCTACA	072B2D04
AUBES3729	475	312.872	22	66.146	GGAACCCCAAATTTCTCTCC	AGAGGGGAGCTGGTGTAGTG	065B1F08
AUBES3728	34	490.448	15	31.298	ACGGGGTCAGTCAGATCAGT	GGATGCAGGTGGTTACGAGT	064A1B10
AUBES3726	60	688.318	29	59.762	GCAGTAGATCGACAGGGAAAG	AAAAGTGCACCGTCCTGTAA	053A1F05
AUBES3723	435	465.08	16	70.754	TGCATTCATTGTTGTATCATTCTG	AATGTTTTGGGGAAGCACCT	049A1H06
AUBES3720	1401	624.053	9	9.505	AAGCTCTCCTGGGCGTTTAC	GTGCTGCTGGTTTGTTTGTG	046A2D01
AUBES3719	453	468.462	22	66.259	ATGATCAAATCGGACCAACC	CTCAACTAATGCCTCTGTGTGTG	039A1C09
AUBES3718	328	392.358	7	69.812	GGACATTTGGTCCCATCAAG	CACGAGCTGATTTGCAAGAG	035B2E01
AUBES3717	236	794.864	8	44.584	AGCAGCAGCTCCAGAAAGAG	CTCACCGTTCTCTGCATCCT	034B1C11
AUBES3716	72	1337.74	9	30.436	GAAATCCAGTCAGGGTCGTC	TGTTGAATGAGGCTGTCGTG	030B1G12
AUBES3714	709	387.285	11	44.979	GGAACCGGCTGAACATAAAC	TGGCACTGATTTGGCTAATG	029A2D03
AUBES3713	72	1337.74	9	30.57	CCCAGAACCCCCACTAGAAC	GGAATGATCAAGTGCACCAC	028B2A05
AUBES3712	682	473.536	11	41.304	CCAAGGGACATTAACCCTGA	CCCAGATTTTCAGCCTTCCT	023B1B12
AUBES3711	398	761.04	24	14.059	GAAATCTTTGTATGCCTGGGTA	AGAGCAGGCCTCTCCTCTG	023A2F11
AUBES3708	601	385.594	12	47.075	CCCTTAATTCTGGCTGGTTG	CAATTCTCCGAACATGAGCA	019A1B02
AUBES3703	9	2005.76	7	69.744	GGTTCCGAGGTTGAAGATTG	CATGCCCACAAGTTTCCTTT	005B2G07
AUBES3702	199	683.245	13	47.853	GCACATGACCAGAGCACATT	GAAGGTTTTTGCCAAACTGC	004B1D10
AUBES3701	1894	329.784	6	40.625	AGGTGTGAGGTGTGAACGTG	TCTGTCCATTCCCCAGAGAC	052B2C07
AUBES3698	1455	338.24	6	41.068	CATGATAGAACTGGAACACACAAA	CTCAAAAGCAGGATCCGAGA	106A1A08
AUBES3695	1044	223.238	5	37.286	CTGTGCATGAGGCAGACATT	GGCTCCATCCATCCAGTTAT	047A2H08
AUBES3694	1023	387.285	4	58.206	TTTGCATCATTTTGCAACTTC	ACAAGAGCTGGCAAACCATC	031A1A11
AUBES3693	838	260.445	24	15.482	TGCTTTGGTACTTCCCTTCAA	AGCCTGCAAGCAGAATTATTTA	010A1E04
AUBES3692	830	674.789	6	40.83	GAGGGCCGTTGGATTACTTT	CTTGCAAACGGTCCATAACA	095B2D08
AUBES3691	809	443.094	23	25.114	GGTGGCGTAACCAGATTTGA	TGACCTGATTTCTTCGGTGTT	019A2G04
AUBES3690	776	454.933	6	40.381	GTCCCCAGCAAGTGAAACAT	ACACATCCACGCCCTAGAGA	096A2F06
AUBES3689	603	443.094	18	33.585	ACCTTCTACCACAGGGAGCA	CAATGCGTATGAGGAATGGA	058A2E08
AUBES3688	504	311.181	1	41.856	CCCACCATTACAACACAGCA	ATCTGGCTCCCTCCTACCTC	048B1B04
AUBES3687	483	257.062	25	59.906	GCTGCCTGCCCAGTAAAGAT	GGTCAGAGGGTGTGACCTGT	013A2B01
AUBES3686	437	257.062	28	64.595	TGGCCAGGATGAATCAATTAC	CAATGTTCTGAAATGACCCAAA	086B2F11
AUBES3683	297	251.989	6	43.509	TGGATGACCTCCTCCTTCTC	GCGGCATTTTTCAACCTAAA	046A1F10
AUBES3681	171	525.963	6	41.29	TGAAAACACAAATGCATCCAA	AGGCAAACAAGGATGTAGCAC	071A2C10
AUBES3678	59	1070.53	13	49.792	TGAATTTGCACTGATGGTTCA	TCCCCTCATTGTATAACCTCAA	035B1F04
AUBES3665	646	524.272	11	44.747	CACGCCCTGTCGTATATCCT	AACTGATGAGCACGGGTAGG	042A2D10
AUBES3664	590	380.52	6	41.295	GGATGGACGCACACAGATAA	AAGGGCGTGTGTAAAGTTCG	051A2C05
AUBES3660	400	257.062	7	69.85	TACTAAGGAGCCCTGCGATG	CATGAATGTGTGGTTCTGTGG	034B2E02
AUBES3657	211	953.837	23	26.351	CTCCACAGGAAAGCCTTTGT	ATGCCGTGTAACTCCCACA	083A1B07
AUBES3653	72	1337.74	9	27.9	GCACCTCCTGGTGACGATA	CCGAAGGCCTTACAGAACTC	062A2A11
AUBES3649	793	279.048	11	29.328	CCAGCAAATGTCAGGGGTTA	CTGTGAATGGGCTGTTGCTA	007A2E07
AUBES3648	793	279.048	11	49.364	ATCAGATTGGCGAGGTGAAC	CAATTCGACCCCTGTAAAGC	051A2H09
AUBES3647	789	279.048	3	66.233	TCTTGAGCATTTCCCAGGAT	CGACACACATGGCATACACA	100B2D04
AUBES3646	789	279.048	3	65.519	TGTAACGGCAACGGTTTGTA	GCTATGGTTAACGAGCTGGA	086B2A10
AUBES3645	770	248.606	29	63.498	CCAACATGAAAACCTGTACCA	GGCATAAAGGCTGGATTTACC	034B1D03
AUBES3644	770	248.606	29	63.598	CAGCTACTGCTTTGCTGCTG	TTCGGCACGCTATACGAAG	056B2G04
AUBES3643	742	284.122	21	18.911	CCTTGAGCTCAGGAAAAGCA	TTGGGATAGATTGACTGCTTGA	031B2A02
AUBES3642	742	284.122	21	18.916	CATTGATGAAGTCAAGATAGCTAGAGA	AAGGGACAATTGATGCTGGA	054B1F05
AUBES3640	710	339.931	14	71.013	GTGCCACACATTGAGGAAAG	AATGCATGCAATGTCCAAGA	073B2C12
AUBES3639	676	387.285	4	57.549	CAGCTCAAGGGTTGTCATCA	ACGGTGACAGGAAAGAGGTG	044B2B04
AUBES3638	676	387.285	4	56.787	CAGCTTGTTGCTTTCCCTTC	GCGGCTGTATCATTTCAGAG	086A2D04
AUBES3637	644	334.858	16	77.448	CACCTGAGAGATCATGAAAACA	ACACCGGAACTGTCACTGGT	105B2F04
AUBES3633	544	292.578	2	41.751	GTCGGGTTCCTCTCAAGGTT	TTGCAAACACAACACAGTGC	006A2E07
AUBES3632	458	317.946	10	76.867	CGTGGTGGTTGAGCAGATTT	ATCGAGACGATCTTGCCACT	081A2B09
AUBES3631	458	317.946	10	77.332	CCATTGGGATAACGTGGTCT	GAGATAGCCGGTGGCACTT	032B2A03
AUBES3630	427	306.107	5	44.517	CCTGAGTTTTGGGTGCAAAG	AACAAAAGCCCCTCACACAC	085A1H07
AUBES3629	427	306.107	5	44.125	CCAGGCCACCTCAATATGAT	AAGGAACTTACACAAACAACTTTGC	109B1E11
AUBES3628	407	294.269	2	41.86	AGCCAATGTTTCTGGACTCG	CTGGAAACAGACTCCACACTGA	020B2G10
AUBES3627	407	294.269	2	40.566	AGTCTGGTGAACGGGTTTGA	CAACACCTACCATTAGCCACCT	049A1A10
AUBES3626	337	250.298	2	33.11	ATGCATGCAATTTACCCACA	CCCTAAGGCTCCAATAAGTGC	055B1C09
AUBES3625	337	250.298	2	37.046	CAGAGCTACGAGCAGAGCAT	CCGTACTGGAGCGGAGTAAG	073A1C09
AUBES3624	294	219.856	29	54.96	CCGATACCAGTCACAGAACCA	CCTCACTCTTTCTCGGTGCT	026B1E01
AUBES3623	294	219.856	29	54.931	CCGATACCAGTCACAGAACCA	CCTCACTCTTTCTCGGTGCT	009B1F10
AUBES3622	228	279.048	12	47.123	GGTGCTTTTTGTGCATCCAT	TCAGGCACCATCAGACAAAG	110A2H03
AUBES3621	228	279.048	20	55.418	AGCATGTCACACCCTGCATA	GATGGCTACCGGATTCAACA	078A1B06
AUBES3620	208	348.387	15	17.451	GGAGGGGAAATGACATCATACT	CCACAAAGTTTTGGCACAGA	006A1G05
AUBES3619	208	348.387	15	32.134	GGACGACGTCTCCTTCAGAT	CTGTCAACCAGTGGAGTCAGA	110A2C07
AUBES3618	175	273.974	14	57.706	CCACTGTTGTGCCAAAGAGA	TTGAGACCATCCAAGAATGC	034B2B06
AUBES3617	175	273.974	14	57.871	CCACTGTTGTGCCAAAGAGA	CCATCCTGGGTGATTCTTACA	082A2D10
AUBES3616	156	294.269	14	58.935	GGTGGCAGCTGGTTAATATTGT	AGCCTTGCTCTTTAGCATCG	054B1B09
AUBES3615	156	294.269	14	58.935	TGGTGATGAACATGAAACAGAAG	TTTTGGCCATAATCATGCAG	031B2A07
AUBES3614	1635	410.962	6	41.06	GGTCGCTAATACCCTCATCG	CTGGAAAATCACGAATTGGA	111A2A03
AUBES3613	1635	410.962	6	41.06	ACGGCAAAAGGAAACTGATG	GCCAGCTAACGCATTCTCAC	096A1A01
AUBES3612	1592	460.006	12	21.316	GAGGATGCCTTGTCCTAACAT	TGGCATTTTGCTGCTGAATA	013A1A01
AUBES3609	1575	312.872	17	5.273	GCCTAGACGCCGAAGAATTT	AAGTCCAACCTAGATACAATAGGC	013A1F04
AUBES3608	1487	546.258	4	61.494	TCTGCAAATCCAGTTCACCA	AACCTTTTCTGGCTCTGGAA	029A1H01
AUBES3607	1487	546.258	4	61.731	CATGCGACCCTTTGTAGGAT	TCAGCCAAAGGAAAATGTCA	041B2C01
AUBES3601	1315	388.976	10	71.46	GGTTGGATTCTCTGCTGGAC	TTGCAAGGACCTGATTTATCG	043A1A07
AUBES3600	1315	388.976	10	69.155	GGTCTCGCTCCCAAATGTAA	TGGAAGATTTTAAGGCAGTGG	066A2D06
AUBES3598	1289	683.245	1	23.813	AGCACAAAACTGTGCAGGTG	TCGGATTCTCCAGTAACTCCA	029B1G06
AUBES3596	1234	424.491	5	44.517	CTTGCAGTTTTGCAGCAATC	GCTACAGCCTGCACCATTCT	112A1F10
AUBES3595	1209	470.154	5	53.019	AACACCCGACTCTCCATCAG	GCACTGGGCTACCTACTTGC	013B2B01
AUBES3594	1209	470.154	5	54.294	CCACCAATAGGGCAAGTCTG	CTCCGAATCTGGTGACGATT	044B1E02
AUBES3593	1093	461.698	26	51.786	TGACGTGTGGTTGCTTAAAGA	GACCGATGTTCCTTCACCAT	090A1E09
AUBES3592	1093	461.698	26	52.108	CACGCCCTTTCACAGTACAA	CTGCCACCCATCCTTCTATC	087A2G05
AUBES3591	1090	289.195	6	43.09	CAAATCTGGGCCAAATGAAG	GAGGAGTTGCCTCAGGAAGA	050B1B01
AUBES3590	1090	289.195	5	45.746	CGCTTTGTACATGCAGTGTTG	CATCCTGATTAGGGCTGTGG	042B2A06
AUBES3589	1076	483.683	28	67.664	TGCTTCCCATACCAGTGTGA	ATGCCAATGAAAGGTCCTCA	028B1F04
AUBES3587	1062	480.301	16	17.996	CGCCAATCATTCTGGAGTTT	CACTTGGCAGCATCAAGAAA	075A1E10
AUBES3586	1062	480.301	16	14.286	TGCGCTCAAGAGTTGCACTA	TGGAGATGCATTGAGGAGAA	096A2G09
AUBES3585	1046	502.286	14	54.782	TGGGGAGAAACACCAAGAAT	CACTCCCGGTCAAAAGTTTA	106A1H10
AUBES3584	1046	502.286	14	53.933	ACACCAGTCTGCTCCTCCAG	CACTGCAGGCATTCTTCTCA	101A1H04
AUBES3583	1034	309.49	17	5.299	CATGCTCAAGCAATTTTTGG	TCATTTCAATCTTCTGCTTTCTG	061B1A01
AUBES3581	1033	245.224	15	0	CTGGACAGTTGAAGCATGGA	GTCGATGAAGGAGGGAAACA	060B2D05
AUBES3580	987	326.402	17	12.112	GCACTGGGCTTCTAGTGGAC	GTGGCTTGAAAGTGGGAACT	007A1A04
AUBES3579	987	326.402	17	5.81	GGGCAGGCCTAATTTCTGTC	AGGAGACTTCGTCCGGAAAT	004A1B07
AUBES3577	941	280.739	11	44.165	TTGTCTCAGCCAAGAACAGG	GGGACCAGGGTAAAGCAGTT	077B2D01
AUBES3576	939	246.915	4	58.031	CCACCATCCCGTACAGTTTC	TGTCGCATTTGGATAAGACG	106B2G01
AUBES3574	895	358.534	8	6.187	TGTTTGTCCCGGTACTATGTTG	CCTTCATGAACCATGATCTGC	008A1F10
AUBES3573	895	358.534	8	6.187	GACACCCAGTCAGTTGTGGA	CAGTGTTTGGTAGGGTTGCAT	027B2G08
AUBES3572	844	270.592	27	35.774	GCCTCACTGGGTAACTTGCT	CAGTTGACATTTTGCTGACG	084B1F08
AUBES3571	844	270.592	27	35.774	GCCTCACTGGGTAACTTGCT	CAGTTGACATTTTGCTGACG	033B2G03
AUBES3569	780	233.386	8	72.504	GATCATTTTCCGGAAGGACA	GGGAGCATGTCACCAATCAT	018A2H02
AUBES3568	772	311.181	1	25.356	ACTTCAGCCATTGAGGAGGA	CCATCTCACATGTTGCTTCC	003A2C01
AUBES3567	772	311.181	1	25.985	ACTTCAGCCATTGAGGAGGA	CCATCTCACATGTTGCTTCC	007A2E09
AUBES3566	767	253.68	1	23.455	CCGAAAGTGGACCTTTCAAC	CAAATATGGAAAGGAGGCTGT	044A1G01
AUBES3565	767	253.68	1	25.697	CCCATGATTGGCTAATGTCTCT	CGGGACTCCATGAGCACTA	014A2B10
AUBES3564	762	378.829	28	47.997	CTTCACGTCCAGCAGAGACA	GCTGGGTATTGGATCTGAGC	005B1B09
AUBES3563	762	378.829	28	42.996	CGTTCCGTTATCATCGTGTG	CATGCAATGCAGGTTTGAGT	029B1D01
AUBES3562	761	348.387	16	64.818	AGCTTGTGGTGGCCTAACAG	ATCATCCCAGACCCAAAGGT	105B2B07
AUBES3560	752	336.549	20	47.561	TAACGCACAGCTAGGCACAC	GCTGTGGGCTCGTAATTAAA	002B2D09
AUBES3557	738	304.416	13	49.643	CAGTGGCATCACGCATTACT	TTGTGGTGGAATAGGGCTAGA	068B2H03
AUBES3556	586	412.653	21	63.933	GTGGGTCATTTAGGCAAAACA	TGCTAAATACGGGCTCTGCT	007A2D02
AUBES3555	401	317.946	13	47.782	CATGGGTTCATAATTATTGGTTCA	TGTGCTTTCACACACACTCG	022A1C03
AUBES3554	261	174.194	29	57.561	GGTCTGTTTTTACTCTCGCTGAA	TCTTCCTAAACCTCCTTCCTG	031B2F06
AUBES3553	1017	309.49	22	63.834	TGCCTCTATTTGCCTGTTTC	TGTATAAAGTGCCTTGAGAAGCTG	092B2D03
AUBES3552	918	532.728	18	8.72	CCCTGCTGATAGGGATTTTG	TGAGATTGGATGCAGGTGTG	013B2F08
AUBES3551	604	323.019	17	5.273	GCACATGTGACTCTGATCGT	GCTGGTTTCCTGAAGGTTTG	109B1C07
AUBES3550	581	353.461	28	62.804	CTGCATGAGATTTAAAGGGGTTA	CTGGAACGCTTCATTTCCTC	044A1C12
AUBES3549	526	385.594	14	62.92	TATGTGCAAGCAGCCTTCAG	CCATGAACCCATGAACTTCC	005A2C12
AUBES3547	451	311.181	25	60.627	CGGACATGGTACTGGTGATG	GCAGTGAGAGGGAGACCATT	108A2B12
AUBES3546	441	338.24	12	64.561	CCACTGCATGGTCAAGTTTT	CATGGACAGCTCATTGCCTA	056A1G08
AUBES3545	381	267.21	10	76.966	CTGCGTCACATTTTCAGCAC	CTGACACCTGCCATCAAAAA	044A2D08
AUBES3544	377	339.931	3	58.36	GGGAAATATCACAGCCAGGA	AACGTTCATCCCATGTCTCC	011A1C06
AUBES3542	217	289.195	12	47.075	CTTCTGAGCCCATGTCACCT	GCCTGTCTCTCTTCAAAAGCA	071A2E10
AUBES3541	140	725.525	15	4.594	TGCAGACAGGGAGGAGAAAT	CCTCGTCCTGCAAAGTATCC	096A1H10
AUBES3539	276	739.054	20	55.02	GCAGTCAGCATAAAGTGCCATA	CCAAACTTCAGCAGGTTTTGT	074B1D03
AUBES3538	181	695.083	8	4.041	CAATTGGGCGTTTTATTTGG	ATGAAGCGTTGGATGGATTC	090A1H01
AUBES3536	227	475.227	3	51.772	CATTCCCTTGCTCCTTCATC	TTGAAATGGATTTCCCATAGC	052B1H01
AUBES3535	1142	586.846	20	50.507	CTTGAAGTCAGACAGTACTCATGG	CGGCCATGTTTCTGAAGATT	038A1B06
AUBES3534	1118	625.744	21	19.052	CAAGAGGCAGGGCTGAACTA	TTCAATGTTTCGGGTGTGTG	095A1A12
AUBES3533	981	693.392	9	8.461	ATCATCTGCCTGAGGGTGAA	GTGCTGCTGAAGTGGACTGA	100B2G05
AUBES3527	646	524.272	11	44.134	CACGCCCTGTCGTATATCCT	AACTGATGAGCACGGGTAGG	042A2D10
AUBES3523	402	569.934	21	21.716	GAGAGAAATAAGGCAGTCAAAAGC	TGATTGTTTACACACTGTTGGTG	054B2H06
AUBES3520	355	463.389	20	55.435	AAGCATGAGAAAGGCTTAGGG	TGCATTTCTTCCTCCATGTT	090A1D10
AUBES3519	240	551.331	22	70.833	GAGTGAATGTCCTCAGGGACT	TCAACAGGGGTCATTTAGCC	102B2E03
AUBES3518	240	551.331	22	67.569	GCAAATCCTGAGGAGGATCA	AAAGGAGGGCTGTGAGTGAC	072B2E06
AUBES3516	173	558.096	19	35.65	TCAGGGATTGTAACAGCCAGT	TTATGGAACGCCCACTAAGC	083B1F11
AUBES3514	171	525.963	6	40.802	TGGCCAGGCATAGTGAAGTA	GCTTCTGCATGCAATCATGT	078B1A04
AUBES3513	113	460.006	12	52.156	GCCTATTTAGATTGGCCTTGG	CAGAGGTTCAGCTCAGCAGT	110A1A08
AUBES3507	28	473.536	15	37.414	TGGCTTGAAAAAGCCAACAT	CAGCCCGAAGGACTGTTTAG	061A1B09
AUBES3506	28	473.536	15	33.483	TCTTCCCTGTTTGAGGCACT	CCAGGAAACAAAAACGATGG	054A2E04
AUBES3505	16	544.566	25	59.236	CAGACATGAATGTGGACTGACA	CACATGGATGAAGGAAGCTG	109A2D11
AUBES3503	695	564.861	24	22.729	ACCAGGAGCTTGTTGACTGG	TTCGTTCAGGAATCCAAACA	110B2C06
AUBES3502	695	564.861	24	24.236	CTTGACCCTGATTGGGTTACA	CCCCTCTTTATGGGAAGCTC	054B2B10
AUBES3501	625	326.402	10	67.315	CATTCATCAATGCAGCCAGT	TGTCATTGTTGCTGCCATTT	104B2E02
AUBES3500	625	326.402	10	66.888	GCACGCACACATACAAACCT	TGGGATTCTGGGAGCATTTA	096A2B11
AUBES3499	618	263.827	9	11.197	ACACACAGCCCACCTCTTTC	GTTATGCAAATTGGCCCTGA	045B1C11
AUBES3497	596	417.726	12	72.805	AGGGTGTGAACGACTGTGTTT	GAATTCATCGAGGTGCCAAT	056A1A10
AUBES3496	596	417.726	12	76.381	CGTCTCCGAGAAACACCGTA	CCATTAGGTGGCGGTAACAC	040B1H03
AUBES3494	580	372.064	20	29.76	GGGCACTGTATGTGCATGTT	AGTGAAGGGTGTGGGACACT	034A1F05
AUBES3493	537	321.328	28	81.391	TGGGTTTATGGCTGAAGACAC	CTGCTCATGGTGCCGTTAAT	043A2D04
AUBES3491	477	329.784	3	66.48	CACCTGAAGGATGAGCGAAC	TGTCACAGTAAGCCTCCGGTA	021A1E05
AUBES3489	469	311.181	25	44.905	TGCTCTGTGTTACGTGTTTTCA	GACTTCAGGCTCTGGAATGG	038A2E02
AUBES3488	429	301.034	7	69	CTGAGGATGGTGGTTTTTGC	AAGTGGCGGTGGATATGGT	040A2H11
AUBES3487	429	301.034	7	68.985	TCTCCCTCTTGGACATCTGC	GCAGTCCAAGGACAAACCAT	083A2E10
AUBES3486	401	317.946	13	48.688	AGGCTTCGTGCAGACACAC	TGGTGCCGGAGAACTTTAAC	082A2E03
AUBES3485	388	273.974	8	44.584	GCACCTGGAGTGAACTGAATG	TTTCCATTGCATCTGTTCGT	018A2D09
AUBES3484	388	273.974	8	44.29	AACAGCATGGGTGATCATAGG	GCACAGGTGCCTGTCAGTAA	031B2A04
AUBES3481	295	358.534	24	14.912	AGACACCGTCGTATCGCATT	GACTCTCCACAGGCATCACC	111A2G04
AUBES3480	282	407.579	11	61.074	TCCACTCCAGCATGTTTCAT	GCCGTGTATTGGTGGAATGT	096A2G11
AUBES3478	261	174.194	29	57.974	GGTCTGTTTTTACTCTCGCTGA	TGTCACCCAAGTCCATTAACA	078B1E09
AUBES3476	251	257.062	13	49.812	CCAGTGCCAGTGCTTTGTAA	TCCTTCACCAGCCTTTCTTG	062A2E09
AUBES3475	251	257.062	1	25.673	AGTCTCCAGTGCCAGTGCTT	CCTTCACCAGCCTTTCTTGT	062B2G06
AUBES3474	225	267.21	11	44.978	GCGCTGAACAGAACTGGATT	CCCAAGAACCACTGAGGAAA	008A2G10
AUBES3473	225	267.21	11	45.736	GGCCCTGTTTCAAAGATGAT	GGGGGTGAGCAATACGACTA	073A1F08
AUBES3471	57	245.224	7	69.235	TCCCCGTGAAGTCTGTGATA	GCAAGCTTGGCTTGTTGATT	082A1A12
AUBES3470	1800	378.829	12	71.556	GCACGCTCATGTGAAAACAC	TCACACTGTCCGACGTGACT	044A1B01
AUBES3469	1800	378.829	12	66.719	TGGTCGGAAGGTGTTCCTAT	CGACGCAGCATTCTGTAAAA	061A2F02
AUBES3468	1598	432.947	4	58.383	TCCCAACATTCCGTAGTAGACC	CAAATTGTGTGAGGGAGAACAA	006B2F03
AUBES3467	1598	432.947	25	64.916	TACACAGTTGGGTGTAAGTAAGGTA	GCCCAAAGTTCAGGGTTTCT	085A2D10
AUBES3466	1509	375.446	17	5.291	GCTCTGTTAATGACCCGTGAA	ATGACTGCCGCTCACTGTAA	060B1H03
AUBES3465	1509	375.446	17	8.741	AAGCTGAAGAGTGCAAATGAGA	TCCTTGAGCTTGTGGAAAGG	011A2B06
AUBES3464	1490	387.285	20	56.037	GCGCCTAATGTTGATATTCGT	CAGTAGGCGAAATGCATGTAA	005B2H01
AUBES3463	1490	387.285	20	56.037	CGTAGATTGCTGTTGCGACT	GGTCGCGTGCACACTATTT	112A1C10
AUBES3462	1196	265.518	27	40.242	TAGCAGGAAATTAGCGGTCA	CACTTGCACAAATGCTTCCT	022B1H11
AUBES3458	1031	258.754	6	41.06	TGGTGTCCCAGATAGGGTGT	CTTAAACCCCTGGACCCACT	109B1C05
AUBES3457	1031	258.754	6	41.062	TGAACACCAGGACAACATGAA	GGTAACCACTACGCCACCAT	072A1G08
AUBES3456	1017	309.49	22	66.259	GGATTCCTCTGCATTTCTGC	GTGAAGTATCAACCTAATCATTGACA	014A1A01
AUBES3454	997	338.24	17	5.88	GAACAGCTTTCGCTCATTCA	CGTGAAAAATTGCCGGTATC	006B1D09
AUBES3452	949	383.902	1	25.745	TGGTAAGCCTCTGTTGAGTGA	GGTGTAGGCAGTTCCAGCTT	087B2E05
AUBES3451	949	383.902	1	25.59	GCATAAAGGAACAGAAAATTACCC	TCTGTTGAATACAGCACCAGAA	066A2H10
AUBES3449	918	532.728	18	8.692	GCGAATAAAGCACTGTTTCCA	CCATAAGACGACACGCACAT	102A1C09
AUBES3448	875	346.696	11	44.47	GCTGCTGAGAGTGGTGGTAA	AAAAATGTGAGGGGTGTACTCA	008A1D08
AUBES3446	853	402.506	5	46.392	GCACACTCCTACCAGCCCTA	GTAATGCAACGCAATGTTCG	106B1B02
AUBES3445	853	402.506	5	46.76	CCTGGAATACTGGGCTCAAA	CGATAAGCAAATGACAGTACAACA	023A1A02
AUBES3444	702	378.829	3	82.001	TGGAAGCGGTAACGAAACTT	CGTGAACTGAGGAGTGGCTA	110B1F11
AUBES3443	702	378.829	3	81.601	CAACCTGCAGCACAAACATT	AACAGGCAGCTGCATTCAT	065B1H10
AUBES3440	652	404.197	13	50.425	GGAATGAAAACGCTCAAACG	GATGCTCGGCTTGGATAGAG	104B1G10
AUBES3439	652	404.197	13	49.661	GCTGAAATGCGTCACATGAT	GGGTTAGGGCTGCTTGATTA	053A2C06
AUBES3437	604	323.019	17	6.076	TCACCCATTAACCAGCACAA	CTTCCAGAGTCGGTTCCACA	108A1E08
AUBES3436	595	394.05	14	61.621	GCGAGGGCAAGGAGTATCT	TGATGCACCAGAGAACCAGA	067B1F10
AUBES3435	595	394.05	14	58.585	ACATCCCCCTGGCTCTTAAT	TGGGAATTGGAGTAGAACAGG	095B2G04
AUBES3434	590	380.52	6	41.06	AGCCGCAGTGTATCCAGACT	CTGCTTCATCGCTCTGTCAA	098A2H11
AUBES3433	590	380.52	6	43.733	GTGGGGGAGAAAATCCATTC	ACAAGCACACATTCCCTCGT	026A1A03
AUBES3432	588	275.666	15	35.02	TCTGTCTCAAATGCTCGGTCT	GTGCCAAATGTTCAAAGCAA	068A2H05
AUBES3431	588	275.666	15	31.547	GGCCGTTGACGTTACCTTTA	GTCCCAACCTGTGAGCTGTT	045A1B01
AUBES3430	581	353.461	28	0.807	GAGGACGCTGATGGAGTCAT	CCGGAAATTGGATTCTGGAT	054B2C08
AUBES3426	526	385.594	14	61.646	TCACCCTGACATTACCTGGTT	CATCATGCTTCTGCAACTTCA	069A1D11
AUBES3425	471	458.315	11	29.588	CAGCTTTCCCGAAACGTAAA	GTGCATTGAGAAAGGCACAG	056A1A06
AUBES3424	471	458.315	11	29.328	TACAAAATGGTGCCCACAGA	CGAGCTACAAATTGGGGTGA	112B1C10
AUBES3423	470	360.226	6	40.792	TCGCACTCTCATAAGGACCA	CACTCAGCCCCAGTCCTAAC	081A2C11
AUBES3421	468	348.387	1	39.29	TTCTTCATGCCTTGCTCTAAG	GGGCATGCCTTGGTTATATG	077B1H08
AUBES3420	468	348.387	1	39.368	GCGCTTAAAAGCAAATAGATTG	GGGCATGCCTTGGTTATATG	007B1H07
AUBES3419	451	311.181	25	60.738	GATGGCTTGGTTTCAGTGCT	CTGTGGGACAAGTGAGCAAG	040A1G09
AUBES3416	441	338.24	12	69.048	CTGCAGGTTGCTGAGACTGT	AGGTGCGCATAGACACACTG	028A1A07
AUBES3415	406	297.651	18	33.563	ACGTGGGCCTCTGTAATCAG	GTCTTGCATGCTCAGCTGTC	075A1A08
AUBES3414	406	297.651	18	33.582	TTGACCCAGGACCTCAGTG	CTGCTTAAGAGCGAGGAAGC	104B1E10
AUBES3412	381	267.21	10	77.566	TTATTCCAAAAGGCCTGGTC	CAGTTGATTGCTGATGCCTTC	032A1E06
AUBES3409	369	492.139	7	61.681	CACCTGAGGTCAAATCACCA	GTGCGTTTGGGCTATAAAGTG	078A2H10
AUBES3408	369	492.139	7	54.327	CAGAAATATGCGTGCAAACC	GCGCCCTAAATATGGGAGAT	008B2C12
AUBES3407	363	328.093	15	8.401	GCCTCAAAGCCTTCTGTTTG	GATTGTGCTCCAGTCATCCA	069B2F02
AUBES3406	358	268.901	22	66.152	GCTCTGGATAATGAGGGTGTG	GGTCGAGCAGAACAACGTCT	038A2C08
AUBES3405	358	268.901	22	66.609	CACCCTAATGGCATCGATTT	TGTGCAGACAGGTGGGAATA	084B2E02
AUBES3404	351	299.342	1	48.348	AACGCTGCAATGTGGATTTT	CGGTGTTCTTTATGTCCACCA	039A1A04
AUBES3403	351	299.342	1	48.348	GCCGTTGGAGTCTTTGACAT	CCCTTTGCTTTCTCTCTCCA	007B1F09
AUBES3402	339	348.387	5	48.768	CTCGGTCAGCTGATGGGTAG	TTCTCCCAATCTGACGTGCT	096A1E09
AUBES3400	267	363.608	7	69.812	CTAGCAGCACAATTGGCATT	TTCCCTGTGACCCTGAAAAG	067B2H09
AUBES3399	267	363.608	7	69.812	TTGTCCCGACCTTACCATTC	ATGAGCAAGCGGTAATGGAG	010B2E12
AUBES3398	229	316.254	6	41.79	CACGGAATTCCAGCATTCTT	TGTAGTTTGAGGCCACAGCTT	060B1H01
AUBES3397	229	316.254	6	40.202	GAGGCCACTGCTTAGTGACG	CACGGAATTCCAGCATTCTT	020A2H12
AUBES3395	145	351.77	2	26.385	GCCAAAATGTCTTTGGAGGA	CTACGGTGACATTTGGGTCA	042A2B09
AUBES3394	145	351.77	2	34.305	GTGTTGACGCTGTAACACACA	AGCGAATTTATCTGGGGCTA	063A1F02
AUBES3393	79	280.739	13	49.638	GTCCCCACAGCACAGAGTTT	TGGATGTGTCGAATACTTCCTG	105B2F05
AUBES3392	79	280.739	13	49.67	GCCAAAGCCTTGAGCTACTG	TGCTACTGTTTACTGCTCTTTTGG	105A2B07
AUBES3391	200	654.494	18	32.751	TGTTTAAAGCCGGATGTCCT	CCTGTCCTGATGACAAACTGG	088A2D01
AUBES3390	281	1156.78	20	50.949	CTGCCCCCATCATTAGACAT	GACAATTGAAATCATATGGTGGA	070A2G04
AUBES3384	278	510.742	6	41.992	CGAATTGCACCTACAGAGATGA	CGTGCACCTGAAACGTAATTT	072B2B09
AUBES3382	130	510.742	20	55.418	ATGTGGACACCTGACCATGA	GTAGTAGCAGGGCAGTTGCTG	112B1E07
AUBES3381	207	502.286	8	44.427	GACCCTGAGGACTTGGATTG	TCCCCAGTAATCCACACTCTG	111B1C04
AUBES3380	189	622.362	8	28.907	CTGACATGTTTCTGATGGATACAA	CGCATCTGCATTACACAAAC	095B2D07
AUBES3379	9	2005.76	17	5.291	ACCCTTGTTCTGTGCAGGTC	CCTTGTGCAAACACAACAGC	081B2D08
AUBES3378	166	889.571	22	60.889	AACGTTTCAATGGGTGCTGT	GGTTGTGTGACAAAAACGACA	072A1C05
AUBES3376	170	1073.91	4	58.911	CATGAGCTGCACACACTCG	TGTCAAACCCCAATACTGAGAG	090A1H09
AUBES3375	50	1048.54	24	14.954	CGTGTGCTTTATTTGGCAGA	GGACCGAGTACCTGTTCCAG	106A1B04
AUBES3374	50	1048.54	17	5.3	CCCCTTTTCCTTGCATTACC	TGAAGTGCTGCTTGAATGGT	098A1F11
AUBES3373	72	1337.74	9	34.471	TCGTTCCTCTCCTCCATCTG	CAGATCAGATTCCCCGTCTC	096A2F05
AUBES3372	154	1129.72	27	40.652	GATTAAACTAATGGATGGAGAATCG	GCGAAGTCATTCAGCGTTAG	084A1H10
AUBES3368	101	926.778	16	73.344	CACATGGGTGTTGGATCACT	GCTGCTACTGAAAGTGCACAA	074A2D05
AUBES3366	442	914.939	16	63.439	GTTTCGGCAGACCAATAGGA	CCACCATTGCCGTCTAAAAC	095A2C07
AUBES3365	885	1133.1	8	42.77	TCAAATGATGCCCAGGAAAT	GGCCTGCCAGAATCTACTGA	074A2E10
AUBES3364	276	739.054	28	71.634	AGGGTATCCCAAAGGTCTCC	CTGGGATAGGCTCCAGGTTC	078A2C02
AUBES3362	241	913.248	16	73.271	CAACCTCATGTGGGGTCAC	GAGAGCGTGTTGGACTTGGT	084A2F05
AUBES3361	222	688.318	18	30.885	TGATCCGGGGTTGTGTATATC	ACCCTTTCCATGCAAGTGAC	104B2F03
AUBES3360	183	825.306	21	6.933	GCAGACGTATTGCGTCATTT	GGCAGTAGATTGGCAGGAAA	072A1H03
AUBES3359	29	847.291	6	40.792	AGAAGGGCAATTTGTGCAAT	CAGCAGACCTGTTTGGAGGT	088B1C05
AUBES3357	455	727.216	8	10.525	TGGCTGAGGAGCTAGAGCAT	GAAGTCCCATCACCAGCAAT	059B1C02
AUBES3355	278	510.742	6	42.815	GGATGTGTAAAGCCCCAGTG	ACTGGTGCTCCCAACTTCAA	078A1A09
AUBES3354	116	620.67	15	33.986	ATCGCCCCAACTTTCGTTTA	CTCACTCTCGCCACGTGATA	063B1C11
AUBES3353	6	632.509	16	74.17	GCCAGGATATCTCGCTTACA	GTGCTTCAGCTGCTTCAAGA	070A2A05
AUBES3352	182	767.805	21	13.056	GGGCTTTGATTGAATGCTGT	CAGGTGTGAAAATGCCTGAA	062A2F02
AUBES3350	149	713.686	1	24.957	GTACCGATGCCACCAAAAGT	GTGTGCGTTTAGGAATGCAG	034A1H08
AUBES3348	38	701.848	16	73.72	ACATGCCTTAACCTCCCACA	CGACCTGTCCTTTAGGCAAC	068B2A02
AUBES3347	454	549.64	17	5.292	CCATGGGATTGTGAAGTTGA	CTGCAAGGCCCTTAACACTC	110B2F02
AUBES3346	454	549.64	17	7.053	GACCATGGGATTGTGAAGTTG	GCCCTTCTGCAAGGTTCTTA	045A1G03
AUBES3345	169	715.378	12	61.798	CCGCACCTTAGTAGCAGTGT	TGGGCATTTTGATGAAACCT	106A1D05
AUBES3342	194	595.302	12	37.095	GCCATTTACCGAGAGTGGAG	ATTCCCGTACAGCAGAGCAC	068B2C04
AUBES3341	262	794.864	28	80.376	TGGAAGACCGATCTCCAGTT	GGCAACCTGAACAAACACAA	094A2B03
AUBES3340	262	794.864	28	80.048	CATGATTGAGGGGAACACTG	GGCTCTCGCTTGATCCTATG	074B1B10
AUBES3336	209	590.229	21	2.421	GGTTCCAGTTGTTCCACGTT	ACATGTTTGTGAAGTGCTGGA	075B2G07
AUBES3335	246	493.83	24	14.427	CAGAGCCTCCGAATGTTACC	GCTTTCTGTGAGGATGCATTT	083A2D09
AUBES3329	191	695.083	14	64.477	GACTGGGTGTAAACAGAATGACC	GCCATCAGCCATTCATGTAG	104A1E06
AUBES3328	480	708.613	8	10.079	AAGGAGTCTCCAGTGTCAGCA	TGAGGAACATCCAAGAGTTTCA	081A2B06
AUBES3327	480	708.613	3	65.579	GCCCGTAAAGGATTTGTTCA	ACGATCCCATCCACACTGAG	070A1D09
AUBES3326	189	622.362	8	32.327	GTTAGAGGCCAAGGCGAAAT	GGATTTGCATGTCCAAAATG	092B2B07
AUBES3324	443	581.773	8	44.539	TGCAAATTGCCCCAAGTAGT	CCCTGGGATAGGTTCCAGTT	059B2F10
AUBES3323	1776	573.317	6	41.295	TGCCTACCTGCAGTATTTTCAA	CAGTTTGCAGGACAAGAACG	090A1C05
AUBES3322	1353	392.358	8	44.427	GCAGGAGAAAGCATCCTGAG	ACCCCATGTTTGGGTAATGA	065B1H12
AUBES3321	1208	353.461	8	45.618	TGCCACCCATGCATTTAATA	CAGTGTGCAGTGTACCTTGTGT	040B2A04
AUBES3320	1067	514.125	20	5.597	AGACTGAGATACTAGCGGTGGA	TTCAGGATACCATGCCCAGT	047A1A07
AUBES3317	904	341.622	10	43.537	AACCCCTGAGCATTAGTCCA	TCTGGGTATCTGGACAGCAC	059A2C11
AUBES3316	774	380.52	8	17.646	TTCAACATTAAAGCCTACACCTG	TTCACCTCCGGAATATGGTT	085B2H11
AUBES3315	724	431.256	11	49.935	GCCCTTGGTCAGTTTATCCA	ACCAAAAGGTTTCTTTGAACTAACA	078A2F05
AUBES3314	717	471.845	15	42.921	TTTGGCCCAATAATTTTGCT	CGTTTCCACTTCCGCACTAT	112A2A07
AUBES3313	714	343.314	20	54.036	CCTTTACTGCATGGTGTTGC	CCTCCAAGCATGACCTTCAC	103B1G09
AUBES3312	703	250.298	4	60.154	ACAATACGATTGGGCTGCTT	CCCTGTAGCCATCAACTTGC	042B1C08
AUBES3311	700	544.566	13	20.642	CCTGTGGCTAGATAAACAGAGGT	GGGTTTCAGCAAGAACAACAG	054B1F01
AUBES3310	673	317.946	18	33.505	TGGGTGATTGAGTGGAGTGT	TTCCGAAGAGCTAAAAGGTTGT	100B1A07
AUBES3309	666	353.461	6	41.298	TTCCAAAGGATTGCAAGGAG	CAGGCTAACTGGGGACACTG	084B1A10
AUBES3307	637	258.754	6	40.83	CCGAGCAAAATTGTGTATGC	AGCAGGGGGAAGTTTCTTTC	087B2G01
AUBES3306	623	390.667	4	58.06	CAATCACACTGAGGAATGCAC	GATCGCAAAGGCTGAATCAT	074B2H10
AUBES3305	589	302.725	24	14.427	CACTCCAGGTGAGGGGATGT	TCATTCATCGCCAGATGGTA	055B1A06
AUBES3304	584	346.696	15	6.498	CAGTGGAAGCCCCATAATGT	CTTGCCAGAACAGCTGGATA	069B2A03
AUBES3303	564	345.005	18	32.746	TGTGCAGGTCACGCTCTATC	CTGCTCAGAGCGGAGTGAAT	052B2F12
AUBES3302	559	326.402	10	48.889	TACGGGGTCAACCTCTTCAT	ACGTTTGAGAACCCCTGGTC	088A1D06
AUBES3300	499	454.933	17	4.948	TCAAGCACCTATTAGTCTGCAA	TGGGTAATCTCATCGGACAT	064B2G07
AUBES3298	478	289.195	1	21.841	TCAAAAGCTGGGAGGTGAAC	TCTTGCAATTACGCTTGCAC	054A1A03
AUBES3297	474	317.946	22	66.259	TTTGATGTTTGTCCCGATCC	CAATTTCCCTTGTGGAATCA	039B2B04
AUBES3296	431	316.254	19	41.306	TTGCTTTTGTGAGCTCTGGA	AAGAGGCAACACGGAGTGAT	048B1D09
AUBES3295	418	272.283	21	15.239	CGGGATCAATTCAACACCTT	TTACTCTTTGGGCTGTGTGC	093A1G05
AUBES3292	389	361.917	22	66.262	ACAGGCAGCTGGAAATAAGC	GTTGTCATGTCTTGGCCAGT	076A2F08
AUBES3289	324	319.637	29	56.603	TTTTGCATTGCTGGTCAGAG	CGTCCAGTGTGAACAAGGTG	102B2G06
AUBES3288	318	453.242	28	5.017	GCGTGCATAAATGAACACAA	TACGCCTCAGTATGGCACAG	103B1E07
AUBES3284	223	319.637	7	68.976	AGGTGAAATTCGGCACAATC	TCCCTTTCTGCATTTTAGACC	083A1E07
AUBES3282	196	275.666	6	40.83	CCGTTTTTCTAAGAGGCTGCT	TCAAAGGTTATTGCGTTGCT	098A2B12
AUBES3281	188	295.96	24	12.492	ACGCTTCCTCCAAGTCATGT	CTTGGTGCGAGGGTTGTAAT	112B2E07
AUBES3280	93	204.635	6	42.952	CCCCACTGTAAGAACCATGA	ACGTAAGAGCTCTGGCCACT	083A2G05
AUBES3278	47	314.563	11	72.706	GCGATACCCATGATCAGCTC	AAAAGCAAACTAACAGGCAAAGA	090A1C02
AUBES3274	1135	573.317	5	45.849	TCTGTTGCAGCAAATCCAAG	TGCAATTCCCTCATTTCAGAC	047B1G09
AUBES3270	744	515.816	20	17.242	GGGCATCAAATGCAAAAAGT	TTAAAACAGTTATTTGACATGAGTCAC	080A2B07
AUBES3265	671	541.184	15	33.902	TGTGCCCTATGATGGGTTG	ACCTTCTGCCCATTGTTCAC	079A1F03
AUBES3263	603	443.094	18	33.585	ACCTTCTACCACAGGGAGCA	ATGCGTATGAGGAATGGAATG	058A2E08
AUBES3260	463	448.168	27	32.139	ACCATCGCACCTAGCAGAAC	AGTTGGAGCCAGGTAAGTGC	046A1B03
AUBES3259	419	524.272	9	8.536	CGAATTCTGGATTGTCATGC	CATCGTGGTCGACATACTGG	068B2D08
AUBES3257	376	392.358	8	44.465	CCTCTTGCGTTCTGTGTCCT	TCCTCTTTTTCTAATAACTTCCTTTC	083A2D06
AUBES3256	376	392.358	8	44.097	TTCAGCTTCCACACAGCATC	TGTCACTATGCTGCCCATGT	054A1D12
AUBES3255	346	456.624	6	41.085	GGCCTTGCATTTGAGAATTT	GGCAAACACAAGTGAAGCTG	070A1H08
AUBES3254	336	290.886	14	58.935	AACGCATCCTCATGCAGTAA	TGACCTTGAAAATGCTGAAAAG	084B1D06
AUBES3253	300	427.874	9	8.533	GACCGTGGCAGGTATCAAAC	GCAGCTGTCTAGCGATACCC	078B1A08
AUBES3249	153	416.035	16	73.72	CGTGTCCAATCCAGTAACCA	TGCCCTGATTTGTGTGTGA	040B1D07
AUBES3248	152	356.843	7	69.638	TTGCTGTGATAAATGTGCGTAGT	CAAATGAGCAGGGAATAAAACA	109A2B04
AUBES3243	70	412.653	25	58.973	CAGAAAGCTGCTGCATCTCA	TTTGTCATGACCACTAAGGTGTG	110A2B02
AUBES3242	41	502.286	21	45.199	GTTCTCCCCGGCGATATTAG	AGTTGCACAACAGGACATGC	105A2C08
AUBES3238	14	404.197	2	42.451	CGTTGATTCCTTTCATTTGG	TGGCTGCCCTATGAAGTTAAA	081B1C05
AUBES3237	534	1072.22	5	46.747	GTGCAGATCCACATAAGTCCA	GGATAAACCCGTGTTGTGGT	023B2G10
AUBES3234	130	510.742	20	68.279	GCGAGGAGCAGCTCATAAAA	CAAGGTCTCTCCTCAGTGGTG	066A1F04
AUBES3233	609	502.286	12	47.075	CTGCTTGAAAAGCAAGATGAAA	GACACCCATGATTGCGTCTA	091A1C08
AUBES3232	9	2005.76	21	24.861	TGACTAGGCTAAAGGCTCAACA	TGACTGTTTCGCATCCTCAG	006A2G05
AUBES3231	9	2005.76	27	40.242	CTTGAGCAAGGCCTTTAACC	TGGCTGTGATTGATGAGTGC	064B1A10
AUBES3230	72	1337.74	9	57.294	GTGTCTGAAGGGCCAAAGAG	CGCTAATCAGTCTAAATGCTTTC	055B1F02
AUBES3229	72	1337.74	9	31.609	ACCGCTCCTCCACAGACTAA	CCCAGTTCCTGTAGGTTTGC	011B1A04
AUBES3228	281	1156.78	20	51.143	CCATTGTCCCTACATGAAAGC	ATGTGCTCTGAACAGACATGC	039A2G11
AUBES3227	281	1156.78	20	51.143	AGGGGATTACACCTCCAAGC	TTGTTGGCAAGACCATACACA	058B2A05
AUBES3225	37	571.626	10	65.33	TGAACCTTGCTAACAAAACGAA	CTTAAGCTGTATTGCAAAAATAGGA	020B2A05
AUBES3224	101	926.778	16	73.05	TTGGTTTATCTGTGGGTAGGAAA	TTTCGCAAACTTTCAAGCAC	035A1A12
AUBES3222	885	1133.1	17	4.681	CCGTTGAATTATTTCACTCACAA	TGACCGGAGCTTTATTTATGC	031B1C07
AUBES3221	885	1133.1	17	5.273	CAGCTAACCTGCACAGACCA	CACAGCCAACAATGAGTGCT	104A2D04
AUBES3219	6	632.509	16	74.247	CACGGCAGACCTTAGCAATA	CAGAGCTGCTGCAACGTAGA	045A1A06
AUBES3218	182	767.805	21	10.594	TTCCCTAATGTGCCTGACATC	ACCCAACCCTGAAAGTGTGA	096A2E04
AUBES3217	211	953.837	23	24.641	CAGATCCTTCCCAGTCTCCA	CCAAAATGGGGAAATCACAA	011B2C08
AUBES3216	404	867.586	7	66.019	GTGAGGCGGAAATGCTACTT	AATGCCTTGACAGCATGTTC	047A2G05
AUBES3215	121	955.528	2	58.953	TGTGTAGCCAGAAATACAGATGC	GACAGCCAGGCACAGAGATA	014A1E01
AUBES3214	55	613.906	14	58.909	CCGCACCAAACTAACAGACA	TGAGTGGGCGCTATGATAAG	105B2C09
AUBES3213	58	630.818	17	4.176	GTCTACTGCCAATCCTTAAGAGC	GCTCCTGCATCGGTAAAGTC	030B1E04
AUBES3209	316	774.57	1	26.041	CATGAATGAGAGGGCATCAG	GATGCCAATCAAAGCAGGAT	032B2G10
AUBES3208	274	612.214	18	33.888	TCATGTCAACAAGCGGTCTG	TCAGACGCTGCATTTTTCTG	077A2D04
AUBES3206	246	493.83	24	14.954	CAACAGACTGTGCCGGAGT	ACGTGGTCGATAAGGCATTC	035B1H08
AUBES3204	266	481.992	11	38.042	GTTTCCTCCCACAGTCCAAA	GTGAAATCCTGGAGGGACTG	083B1C10
AUBES3203	189	622.362	8	30.55	GCTGGGTACTCTGGTTACACAA	AACAGCTTTAACCCCGATGA	057A2F09
AUBES3201	166	889.571	12	42.055	CCTCCAGGAGCTTGAGATTG	GGCCATAGCGATAAGAGCAC	053B2D03
AUBES3200	50	1048.54	29	56.603	AGGGTCCATCATGCTTTCTC	GGGTAAAGTGCTATGCCTGTG	092B2B01
AUBES3199	72	1337.74	9	36.485	CGCTGTATCTGAGCGATGAC	AGTTGGGGGACACCCTAGAC	049B1F09
AUBES3198	252	835.453	22	66.259	GATGTGGTTCCAACCTCGTTA	GGACTTGGCAGATGTGCTTT	108B1D11
AUBES3196	101	926.778	16	73.207	GCCTCTGGGTGAGCAAAATA	ATGGCCAAACAGAGACAGGT	006A2C06
AUBES3194	885	1133.1	8	44.17	TCCTAACATGATTTCCACTGAGG	GTAACCAAGGGCTGGATGTG	048B1B11
AUBES3193	276	739.054	28	71.688	TTCATTGCAGACAGCTGAAAG	TGGGGAATATCACAAAGTTCCT	001A1A10
AUBES3192	29	847.291	22	66.26	GTACATCACCTGAGGGCACA	GGGAGCCAAGTGCATAAGAC	008A1G04
AUBES3191	116	620.67	15	34.384	CCCCATACAAGGTAAAGTGCT	CAGAGGCAGTCAGCTTTTCA	031B1B09
AUBES3190	6	632.509	16	75.132	CCCTTCCCTATGACCTCCTC	GGTTAAGAGGATTTGCATCCAT	059B2A04
AUBES3188	211	953.837	23	22.022	CAACAAATCTCGTGGGAACA	GTGTGAAAGCGCTCATCTGT	005B2B08
AUBES3187	135	618.979	22	66.228	TACCTTGTTGGCACAGCAGA	TTTGAATCGACTGTTGCTCAG	051B2C10
AUBES3184	121	955.528	2	55.781	TGGGAGTTAACCAGGGAAAG	GAGGTTTTTCTCCCCAGTTG	058B1C03
AUBES3183	55	613.906	2	55.409	GAAGCATTGTGGTGCATTGT	CCAGTGTTTTCCAGGGTCAT	107A1H11
AUBES3179	262	794.864	28	80.335	CACTAGATGCAGCACTGGTAAG	GGATGCCTGTTGCACTTCTA	063B2F02
AUBES3178	316	774.57	1	24.723	GTGACAGGAAATGCAGCAGA	CACTACTGTTTGTCGCCAGAAT	053B1E04
AUBES3176	1363	940.307	28	48.551	TCACAGGGTTGCACTACAGC	ATTTTTGACCGGGGGTGTAT	034B1E03
AUBES3171	9	2005.76	4	58.206	GGAAAAAGTGAAGCACTGTGAA	CCAGCTGTCTTCGGTCAAAT	054B1D08
AUBES3170	534	1072.22	5	47.445	CCCATTGCCAGTATTGGTATC	CGGTGACCCTGTGTAGGATAA	086B1B08
AUBES3169	59	1070.53	21	9.599	AACAGGTTAAATGCTGCTTATGA	TCGAATAAGACATGGCAGCTAA	062B2H04
AUBES3168	139	1166.93	17	5.273	GACGCAGCGGAATAACTGA	CATTACGCTCCAGCCAGAGT	107B2D09
AUBES3167	166	889.571	22	59.793	AACGTTTCAATGGGTGCTGT	GGTTGTGTGACAAAAACGACA	108A2E02
AUBES3166	42	1038.4	9	8.558	GTCTCGAGCAGGTGATAGCC	AGACGTCCTGTCTCGGAAAA	055A2C08
AUBES3163	252	835.453	22	61.888	GCACTACCCTCCAGTGCTTT	AGTACCTTGGGCAGCATCAG	053B1E09
AUBES3162	154	1129.72	9	10.409	ACACTGCGTGCTGAACAGAG	TTGCCCACGTGACATTTAGT	103B2A01
AUBES3161	200	654.494	18	33.938	CCTTCATGGCTGAACAGGAC	GCAAAACATGTCCCACCATT	112B1A02
AUBES3160	370	891.262	1	25.367	TCATGTCATGGAGGGTTTTT	CTCCACTCAGACATGGGACA	060A2E06
AUBES3159	74	899.718	23	23.754	GTTGGAGAAAGACCGCACAT	ATGTGGGAGAGCCCACTAAA	087B1A01
AUBES3158	104	852.365	15	35.355	CGGTGATGGAAATGTACACG	CAGTACGGGGAAGTGTTTTGA	082A2C10
AUBES3157	392	1013.03	25	59.998	TGAGGACTTCTGCATGGTTTC	AGGAAAACAGGGTGCTGTGA	010A1F03
AUBES3156	39	750.893	22	65.056	GCTCGATAAAAGGTTGACAAAG	CCCACTATGAAAACACACAATTT	029A2D07
AUBES3155	193	867.586	6	41.062	AAGGCTGGCTCAGAAAAGTG	CTACCAGCTTGCTCCTCTGC	072B2F02
AUBES3154	442	914.939	4	63.042	CGGACGTCACAGAACTCAAG	GCTTAGACGCGCAGAGTGAT	011A1B06
AUBES3153	403	965.675	26	48.667	CCCTGGCCATCTCAAAGTAA	CTGCTGTAATGTCGCAAAATG	052B2H05
AUBES3152	155	884.498	28	72.503	CAATGTGAGGAAGCCTGGTC	GTGTTTTTGGTTGCCCAGA	048A2G04
AUBES3151	241	913.248	16	73.377	GAGGATGCAGTGAGGACACC	TGTGCACCGAGTGTGTTGTA	111B2G05
AUBES3149	199	683.245	13	49.643	TGTGAACCTCTAGGATAAGAGTCA	CTTCAGGGGTTTCCTCCAGT	054A2G09
AUBES3147	183	825.306	21	7.396	CAAATCCAGAGAGGGGACAA	CCTTTCGTCTGAGGGTCACT	058A1F12
AUBES3144	455	727.216	8	10.736	TGGCTGAGGAGCTAGAGCAT	GAAGTCCCATCACCAGCAAT	093A2F06
AUBES3142	182	767.805	21	12.156	GTTTGGGTAGCTCCATGGTC	CCGGCCTAGATAAGATGTGC	047B2B10
AUBES3139	335	744.128	3	66.089	TCATGATCAGGGTTCATCACA	GTGTCCGCTTAGTGGGTTTC	107A1C03
AUBES3136	216	727.216	7	64.722	GCCCATGCCTAAGAGGATTA	CCACAGCCCTGTGTAGGATA	107B1G02
AUBES3133	130	510.742	20	54.447	GAATGCTTTTGACTAGGAGCTTG	TGGGCTTCTCATTGTGACTTT	041B2C02
AUBES3132	890	862.512	15	8.979	CCCATGCACGTGATATTGAT	TGGTCATGACTCACTGGACTG	108B2F02
AUBES3131	214	580.082	15	31.007	GCCTGAGGTTGCTTCAAAAG	GCTCTGTGCAATTTGTGTGC	102B1A02
AUBES3124	518	531.037	12	37.273	TTGAATGCCGTGAAAATGTC	GCAACTGGCCCATTATCCT	034B1B11
AUBES3118	490	752.584	9	8.993	CGGGGCAATTAGTTTTCACA	TTTGGATAAACCCGTGTTCTG	048B1B12
AUBES3117	495	865.894	5	46.346	TACACTGGCAGATGCCTTCA	TGTGTTTCTTGCATGACGTGT	036A1G09
AUBES3115	159	449.859	8	53.022	TAACCCAGCACTGCCTTTG	GCAAGATCTTCACATGAGAAACATAA	029A1D06
AUBES3112	9	2005.76	16	78.054	CGCCGCAAATTTGGTTTAAT	TTACATCCAGCACGCACAAT	109A1B07
AUBES3111	534	1072.22	12	50.127	CAGAAATACACCCTGGAGCTG	CCCATGGCTCAGCTTGTAA	013A2A03
AUBES3110	59	1070.53	13	48.244	GTTTCTTTCTCCCCGAGCTT	GGCTTTCAGAGTCGGAAGTG	058A2H03
AUBES3109	166	889.571	22	71.175	TCACCTGCATCCAATTCAGA	TGGCACCCTTGGTAAATCA	011B1E05
AUBES3108	42	1038.4	1	28.594	GCATGGGCTGCGTAGTTTA	ACCCGTGTTTTCCGATACAG	029B1H10
AUBES3105	154	1129.72	9	8.558	GAGCTCTGGAAAGGCCCTA	AAAACGCTTGCAGACCAATC	064B1H04
AUBES3103	370	891.262	6	44.234	GTGTTCAGATGGTGGTCCAA	GTTTGAAGGCAACTGCACCT	093A2C08
AUBES3102	74	899.718	23	18.602	GGAAGTAACATGGACCCAGAGA	AGGAATCAAATCCCCAAACC	110A1H06
AUBES3101	177	881.115	25	55.99	GGGGGAAATTTCATTTGACTT	GCTTCAGTGCTGTGCAGTTT	046A1B09
AUBES3100	104	852.365	15	34.095	CCTGAAATCTTTCCTGTTTTTG	GCGGTCATGTTACCTTTGGT	098B1D06
AUBES3099	392	1013.03	25	59.904	ACCTCGATGCACAAGGAAAT	TCACCAGGAGGGGATAGAAA	004B1C05
AUBES3097	193	867.586	6	41.877	AAGCATTGTGAGTCCCTAGCTC	TGCATTGCTCAACTCTAATACAC	023A2A01
AUBES3095	403	965.675	26	48.384	ACTGCTGCATGTTCTGGATG	TGACGCCTTCTGTTTTCTGA	084A1F12
AUBES3094	155	884.498	28	71.407	CAGGCGGACCTATTGTTTGT	TGGAAAAGGACATGCATCAG	013B2C01
AUBES3091	40	671.406	26	48.247	ACTCTGAGCCTGAGGGGAAA	TGGAAGAAATATGAGGATTCTGAC	106B2C01
AUBES3090	161	625.744	11	44.979	GAAATTGAAACGGCTCTTGC	GATGCTTTGCCATGCTTTAAC	020A1H02
AUBES3089	199	683.245	13	46.658	CCCAAAAAGGCTCTCTGTAGAA	AGTAGGAAAGCAACGCTGGA	051B1F04
AUBES3088	222	688.318	18	34.856	ACGGAGTTCGCATGTTCTCT	TGCTCACGATGGCAAGTTAG	073A1D03
AUBES3087	183	825.306	21	5.088	TTAATGGGACGGAGTGTGGT	GCCAAAACTGTCAGCCTTTC	109A1D11
AUBES3086	726	745.819	7	68.722	ACCCTGTGCAGGATAAGCAG	GCCAGCTTGTCTCACATCAA	046A2E09
AUBES3085	13	585.155	17	5.273	CAGCTTGGCAATTTATGAGG	ACTGCGGTGACACAAATGAA	020B1D09
AUBES3084	455	727.216	21	11.275	CTGGATGATGGTTGGCTGTA	AAGTGCGACCCAACTGTTTC	062A1B09
AUBES3082	68	668.024	2	42.318	TACACACAGCCTTCCCATCA	TGAACATCCAGCCCAGTTATC	003B2A10
AUBES3080	236	794.864	2	6.02	TCCTCTGGAAGGCTCTCAAC	TTCTGCTTGCACCAAATCAG	092B1H10
AUBES3079	306	588.538	20	56.972	CATCATGTTTGAAGGCAGGA	CATGCAAAAATGTGCAAAGA	021B1B09
AUBES3078	335	744.128	28	37.276	TTACACGCCATACAGCCTGA	GACTCTGAGCCACGGAAGTT	055A1H05
AUBES3076	216	727.216	12	53.182	GGAGCAATGCAAACGAAATC	CAGGCTGGGCTAAGTCTGTT	029B1G01
AUBES3074	97	598.685	3	60.988	GGAAGTTACCTGCAAAACACC	TGCTTTCAACAGTGTTTCCAAC	033B1A12
AUBES3073	890	862.512	24	14.427	GCAGCGTGACACGGTTTAT	CCCCTGCTACTTCACCATTC	011B2H02
AUBES3072	34	490.448	15	32.378	CGGGGTCAGTCAGATCAGTT	AGAGGATGCAGGTGGTTACG	030A1A03
AUBES3071	214	580.082	15	33.55	TTGTTGGGAAACACTTCAACAG	AGCCTATCCCAGGGGACTC	020B1A09
AUBES3070	436	854.056	10	60.51	GCACATCCCAGAACAACCT	ACTGTGCCCTGTAGTTTTGGA	111A1F02
AUBES3068	5	417.726	28	65.853	TTAAGTGCATGAGCCCACAC	TGTCCATCATGATTCCCAAA	104A1A03
AUBES3065	227	475.227	3	54.119	TGTTGAGGTGTCTAGGATGCTG	AAAAGGGCCTGGCTAATTGT	058A2C07
AUBES3062	790	651.112	24	4.847	GCAGTGTCTTGACAAATGGACT	TTGCACAAATTCTCACTTGGA	004A2F01
AUBES3060	32	554.714	13	49.609	CATCCAATCAGAGAGCAGCA	GCGGTCACAGTTGTGCTTAT	102A2A03
AUBES3059	107	495.522	22	66.01	TGGCAGATCTCAGGTAGCAA	AGCCACAGGTTTAGTCTCAAAT	060B1F12
AUBES3056	275	821.923	7	68.722	CATGAAAGCAGGAAAGTCAGG	CAAGCAAACATCAGGCTCTTC	038B2B05
AUBES3055	490	752.584	9	7.555	ACTGAACACCAGTCCGTTCC	CACACTTCCATCTGAAAGACACA	072B2G01
AUBES3054	15	539.493	12	48.98	AAATGGGAATTCGGTACGTG	GTGGTGTCGAATCAACATGG	112A2C06
AUBES3051	443	581.773	8	44.465	TTCACTGCTTTCCTCCAACC	GCCACATAACAGGACCAGTG	052B2D06
AUBES3050	561	532.728	11	44.979	GCTGCACATAATGCAACCTG	TGCTGAACAATCCTTTGCTG	077A2E08
AUBES3049	271	554.714	12	37.095	TTCCAGACTACTTTATCACCAGAA	ACACAGGCCTCGGGAGTAG	076B2D04
AUBES3048	985	573.317	9	8.423	AACAACAGAGTGTCTTCCCTCA	AGATTCAGGATTTTCCGTTCA	075A2G03
AUBES3047	884	490.448	25	58.973	GAGAAGATGGAGCCTGTTGC	GATTATCCTGAGCGCCACTG	074A2G10
AUBES3046	382	554.714	23	14.087	TTCAGGTGTTAGTGCATGACTGT	TAGGAGCCAGCATCCTTTTG	074A2E03
AUBES3042	572	270.592	25	57.231	ATTTGGGGGTATTGATGCAC	CTTTGTAGAATGCACAATGAAGG	062B2G04
AUBES3041	823	410.962	24	14.972	CAGGGTCAAGTGGATGGAAA	TCACATGGCTGAATTTGGTG	062B2C02
AUBES3040	958	553.022	15	21.998	CCCAACCTTGCCTTATGCT	AGGGGGTAGGGTTAGTGTGG	062B2B11
AUBES3038	66	297.651	22	66.262	GGAGCCTTCAACTGAAGAAAAC	TGTTGAGCTGTTTCAAGAAATG	062B1G08
AUBES3036	456	444.786	2	42.441	GGATAAGAGGGAAGAGATGAGC	TACGCAGCACAATGGACAAT	058B1H03
AUBES3035	203	404.197	29	58.797	GACACGGGGAGTTCTGAAAC	GTGCATTGTCTCATTCACAACA	058B1D07
AUBES3034	1232	632.509	26	35.153	AACACAGCGCCTCAGATAGC	TAGCTGGGCATGGTGAAAAT	058A2E03
AUBES3033	421	265.518	23	5.027	TTGGTGCAGTGTGTTTCTTTG	CGAAAATCAGTGTCGCATTC	058A1F07
AUBES3032	599	493.83	25	61.168	TGGATCCAGAGCCTATTCCA	CTTGCCCATAAGGGTGAAGA	056A2B01
AUBES3031	86	287.504	15	25.738	TTCCGATCAGTAAACCAGCA	CACCCTGTCCAGGATGTACC	055A1E05
AUBES3030	1303	446.477	13	61.103	ATCCCAGTCCCGATACACAC	TGGCATGAAACAGCTTATGG	054B2A08
AUBES3028	21	290.886	28	28.014	GGGAAATTCCTCAAGAAATCG	GTGGTGTGAGGGCTACATGA	053A2D05
AUBES3025	502	493.83	9	8.131	TGAGTGGGAAAAGTATGTGAACC	GCATCTGTCACATTGCGTGA	052A1G09
AUBES3023	621	441.403	16	73.186	AAACGGATTTCAAGCAAGAGA	GGGGAGGTGTAGTAGGAGGA	051B1C07
AUBES3022	781	438.021	28	69.777	CCTGGAGGTGTGAGGTGAAT	CCAATAGTGGAGGGCACTGT	049B2E04
AUBES3021	1387	647.73	27	43.043	TGCAAGTGAGAAAACACCACA	CGCACATACACAGCGTTTCT	047B1G04
AUBES3017	502	493.83	6	40.802	TGTGTGGTTTCCCTCTCTCC	TGCCTTTTCAGGGTGTAAGC	041B2G02
AUBES3016	466	460.006	6	41.29	CCATGGCTCCTGGATTTAAG	CCAGCCAGCAAACATGAATA	041A1D03
AUBES3015	769	485.374	6	41.279	TTCTGTTGGTGGAAAGATCTGA	TGACCATAATCCAACTCTTCAAT	040B2G07
AUBES3014	435	465.08	16	54.601	CCCAAAAATCAGAAGGCAGA	GATGAGACCGTGGCTGAACT	040B1A03
AUBES3012	94	461.698	4	58.031	TCCCCTCTGTTTCCTGTCTG	TGACAGACCCATGCATTTAATC	040A1D04
AUBES3009	1502	544.566	20	5.596	AATAAGTGCTCCCGGAGTGA	CAATCAAAAGCTCTGTAACTGAGAG	050A2B09
AUBES3007	622	541.184	28	82.507	TTAGCTGCTTCACCCTGGTC	ATGGGTTTCCCCTAGTGCTC	080A2B05
AUBES3004	530	488.757	6	37.818	ATTTTGTTGACACGCCCAGT	GGGTTTAGGCAGCAAAAGAC	074A1A10
AUBES3002	341	651.112	5	24.326	GGTTTGCCCACATTTTTGTT	GGGCATTTGTGCTTGTAGGT	055A2G09
AUBES3001	242	495.522	21	0.803	CAGGACCTAAACAGCCCTGA	AGCACAGCCTTGGTTTGAAG	053B1H12
AUBES2999	514	502.286	15	6.54	GTGACCGCAGTGAGTACAGC	CCCCGAGACCCAGTAAGAAT	077B1E08
AUBES2996	1502	544.566	20	5.628	AAGCCGAGTTAAACCTGCAC	TTCGTGAGATTGCGTGTCAT	110A1B06
AUBES2995	1461	409.27	7	58.482	CCCTCCTCTGCCCTTTTAAT	CCTCCCCCATACACACAAAC	107B2E02
AUBES2993	1110	512.434	5	44.719	AGCATTCTTTGGATGGGTAA	GCTTCAGTTTGTCCCTCTGG	082B1H09
AUBES2990	481	355.152	20	47.442	TTGCGGTTGTGAGTCAGTCT	TCTCTCGTCCTCATCCACCT	100A2A04
AUBES2987	346	456.624	6	45.813	TTCTCGTCAGAAACCTTTGGA	TGTTTCTGAGATTGGCTCTGG	090A2A03
AUBES2984	305	470.154	3	68.042	CAATCTCTGCACAGCCACAT	GCTTGTTGGTTAGCTCATTCA	106B1A08
AUBES2982	95	365.299	5	63.845	TCACTGGCATTGTTTTCATCA	GCCACAGTACCCTCCACATC	108B1C03
AUBES2979	41	502.286	11	42.615	TTGTCAGGTGTCCACATGCT	GGCTTTCCAAAATGTTGATGA	106A1A05
AUBES2978	38	701.848	16	81.487	GATGCCAAACCCTGTAGAGC	GCGTTTGAGCATGTGTTTGT	100B1E07
AUBES2977	36	525.963	13	84.792	CTGTTCTTTTGCAGCAGCTC	AAGCACCATTAAGGCAGGTG	083A1F10
AUBES2975	1714	503.978	5	45.764	CTCTGTCTTCCGGGTTTGG	CAAATTCTCCTTGGCTCCTG	060A1C06
AUBES2974	1650	421.109	17	4.681	GGTGGGAATACACCCTGGA	TGCACATTCTCCTCTTGTGC	002B2F08
AUBES2968	1267	542.875	18	11.802	GCATCGTGCTGTAATGTTCG	AAGTCGTGCCGGCTAGTTC	022A1H06
AUBES2962	1038	275.666	23	35.517	GATTATTTCGAGCGCGTAGC	GCTCAGGGGATCATAAAGGA	074A2C01
AUBES2958	827	586.846	3	81.443	GTGTGAGGCGAACAACTAAGC	CGTCAAATCTGGGTACTGTCG	013A2B07
AUBES2955	756	399.123	17	5.292	ATCATTTCCAGAAGGCCAGA	TCGCCGTGTACAGTACCTGA	030A1F09
AUBES2954	633	311.181	1	25.76	CACACAGCGTTAAGCACACA	TGTGCAGAAAACTGTGCTGTC	024A1H01
AUBES2953	568	514.125	1	26.345	TGTGCCAACAGACCTCACTC	CTGGGCTCTTGGATTTGACT	051B1G11
AUBES2952	555	321.328	6	41.279	TCCAGTCGTGTTGACACAGG	ACACCCACACAATGCACATC	003B2E04
AUBES2951	531	280.739	7	69.416	TGCTACAGCTGTGAGGTCCA	GTTGGGGAATTGGGTGAGAG	026A2D08
AUBES2944	313	329.784	11	39.383	TGTAAGTGAGCACCGTGAGC	CGTGTTCTGGGTGAGTCTGA	041B1F03
AUBES2943	256	510.742	15	33.886	AGCTCCAGGGCTTCTGATG	TATGAGCCAAGCACTGCAAG	006A1D11
AUBES2942	226	377.138	5	60.322	CATGGAGGGCAAATGATAGG	ATGTGACCCTCATCCATCAC	023A2F09
AUBES2940	160	375.446	16	82.485	GTTCCTGCCAAATTTCCAAC	CTGGGCTATGAGGAACAAGG	012B2H06
AUBES2939	157	295.96	29	59.401	GCTGCCTGTTTGACCCTTAC	TCGGTCATTACCTTGGCTGT	039A2F02
AUBES2938	124	262.136	9	9.421	TGCCCTATAGCCAAACACAA	TTCCTGTGGACATTCAGCAA	009A2H08
AUBES2937	105	275.666	23	25.139	AGAAAAAGTCGCGTCTGTGC	TCTTCCCTGTGTTCCTGCTC	054A2H08
AUBES2936	98	301.034	21	10.561	TGTCCCTGATGTGAGAACCA	GTTTTGCCATGTCGCTGTC	018B2F09
AUBES2933	85	373.755	20	55.127	TGGCATGCAGATGCTTCTAT	TTGCATGCCTCTTGTTTACAT	040B1D02
AUBES2932	63	189.414	18	33.505	CAGTGGATTTTGTGGCAAGA	TGTCATGCTTTGTGGGTCTG	010A1C06
AUBES2930	1444	531.037	18	0	TGGGGCATTTGTTCCTAAAG	GGTGTCACAAGGAGGGAGAA	053A2E12
AUBES2928	1284	312.872	20	50.391	TCATTTGTGAACAACCATACTCC	CACACATTCAACCCCTCCTC	054B2A06
AUBES2927	1258	358.534	1	25.086	TCCACAAAGGCTCTAAGCAC	CTGAAGCCCTGAACCAAAGT	032B2B08
AUBES2926	1205	339.931	3	73.232	ATGGTGATGTGGTGGATACC	TTGGCCCAAGGTACAGACTC	048A2H02
AUBES2925	1120	451.55	7	71.748	TGAGTGCATTTTGCAGTTGG	ATCACCAGGTAATGCCGAAG	031A1C12
AUBES2924	1116	497.213	13	61.941	TCCTTCACTTGACAGCCTCT	TTCCCTACCGCAAATTCTTG	045A2D05
AUBES2923	1106	446.477	26	47.498	ATCACGTTTGCTTGTCCAAA	CCACTGTTGCTGTGAGCTTG	008A1F03
AUBES2921	1069	267.21	4	62.17	GGGACAGAGGACTTTTCTGCT	AAGTTACAACTAATTCTGGAGGTGAA	036B2D05
AUBES2919	956	351.77	19	41.701	CCAGTGAACACGTGGCAATA	AATGGAGGTTTCAGCCAGTG	038B1E09
AUBES2916	879	345.005	9	8.536	CACATCATGCAAAAGCCTTC	AGAAAAACGAGAACAGACAGTGG	005B1E04
AUBES2915	852	410.962	3	85.049	CTGACAAAATGCACACCATTC	CTTCAGCGAAAGCTCGTCTT	007A2E03
AUBES2910	1100	397.432	16	0	AAAAGAAGCGCCAGACTCAC	TCAAAGGAAGGTCTCACAAGG	054B1E02
AUBES2909	948	519.198	19	31.133	TGCTGTCAGATTTCCCGTTA	GACCAGGAGAAGTGGGCTTA	061B2H11
AUBES2908	929	537.802	13	46.005	ATAAGGTGGCAGTGCTGGTC	GCGAGGAAATAGCAGAGGAA	045B2F11
AUBES2906	820	605.45	10	66.475	CTGAGGGAATCTCTGCAAGC	GCAGTGAAGCCGATGATACA	077A2G06
AUBES2905	690	524.272	7	73.314	GTCATGTGTGGCTCCCAAGT	GAGGGGGAAGAGGAAAACAT	053B1E10
AUBES2904	678	525.963	25	62.217	CACTGCTTATTGAAATCCATGC	TGGGAGTTAAGGCAACTGAGA	058A1B09
AUBES2903	671	541.184	15	33.245	TGTGCCCTATGATGGGTTG	ACCTTCTGCCCATTGTTCAC	043B2D09
AUBES2900	632	473.536	18	27.573	GGACTGGGTGTGTTGAAGGA	CCCCCAGTCTTCCTGATACC	030B1B01
AUBES2899	622	541.184	28	93.414	CATGTGCATACACACACTTTCTG	TGACACAGCAGCACAAGTAGG	040A2E07
AUBES2898	608	490.448	7	55.394	CCCATCCAGGGTTCTTGAAT	TGAATTACCTGAAGGTGGCATT	074B1D07
AUBES2897	608	490.448	7	53.372	CCCCTTTTGTGTGGGATTTA	CCGAAGGGCACTAATTAGGAT	052A1E06
AUBES2895	582	757.658	28	38.842	AACCGATTGGTCAAGGTTCA	TGGGAGTTCATCCAAATGGT	064A1A04
AUBES2893	539	613.906	9	13.901	CTGACCGGAGAACCCATATC	TATGAACATGCGTGGCTGAT	058A1G07
AUBES2891	514	502.286	15	2.775	GTGACCGCAGTGAGTACAGC	CCCCGAGACCCAGTAAGAAT	077B1E08
AUBES2889	481	355.152	20	43.103	ACAGTTTGTTCATGCGTCCA	GAAACCAAAGCGCAACAGAT	033B1B12
AUBES2888	453	468.462	22	69.737	GGGGAGAATTTGGAGAATCTG	CAGGTAACGGGATGGCAATA	048B1G07
AUBES2886	376	392.358	8	52.279	CGCTAAATTGCCCCTAGATG	CTCTTTGTTCCCATCTCAATCA	054A1D12
AUBES2885	371	409.27	2	13.64	GCTGTTAAACCATTGCCTGA	ACCCTGCCTGCTTAGTGAAC	074A2G06
AUBES2884	343	661.259	2	13.208	TCACTTTCCTATGGCCTTGTG	ATCCACTCTGTGGTCGGTTC	028A1A11
AUBES2883	341	651.112	5	22.285	GGCATCATGAGAAGCAGAGC	GCCAAACTCACCACACTGTCT	054B1B08
AUBES2882	329	605.45	20	59.644	GATGGAGGAAATGGTTGGTG	TGGTGTCACTGTTCTGTCAGG	073B1D05
AUBES2881	323	585.155	15	36.373	TGTTTGCCTTTTGAACCAGA	AAGGCAAATTGATGGATGGA	058B1E12
AUBES2877	245	426.182	16	83.195	TGAGATGGGTTGACATGTGG	GGAAACAAATGGGGTTATCTCA	033B1A05
AUBES2876	242	495.522	21	1.387	CATCAAGAATCCGCGACATA	TGGCTTTAAGACCTTTTGCAC	057B1D06
AUBES2875	237	388.976	23	0.571	CAGGATATAAACGGCCCTGA	TTTCCGAAGAGGGTATTCACA	078B1B07
AUBES2874	212	519.198	21	8.282	ATCACAATTTGGCCCTTGTC	AGCGATTCTGCTGAAACTGG	045A1H12
AUBES2873	180	889.571	17	5.888	ACACAAGCCGTAACATGCAG	TCCCAAACACCATAACAAGGA	051A1A12
AUBES2870	147	416.035	28	76.188	CAAGGTAACGTAGCCCTGTTTC	TAGGGCTTCTTGGGTGGACT	060A1B08
AUBES2869	144	429.565	25	59.994	GGAACTCTCTGTTCCCACTCA	TTAAGCCTTGGTGGTTCGTT	060B1H06
AUBES2864	92	368.682	13	51.521	TTCAATCCCCAGGAAGAAGA	GGACACAACAACTCGGATGA	074A2H07
AUBES2863	89	387.285	10	65.23	CCAGGATTGCACATTGTTGA	GCTCGAGTGCACACTGTCAT	030B2G11
AUBES2861	76	463.389	15	30.141	TGGGGAAGGTCTGTAGCATT	AGTGAGTATGCCCCAAGAGG	053B2B07
AUBES2859	41	502.286	11	41.027	TGGCAGTGATCCATTCACAT	AAATCCCGTGGTTTTGAGTG	056B2G06
AUBES2856	1179	622.362	18	44.919	CACTGGTATAGAAAAATAGGCAGGT	CCAAGTGTTGCTCAACCTCA	048A2C07
AUBES2848	444	295.96	24	14.427	GGAAGGTTCTGTGCCGAGTA	GCCCCATCCTGATTTCTTCT	030B2E03
AUBES2847	434	346.696	25	59.994	TGGCAGATTTGTTTCCATCA	GGCATGGTCATATGGTGTTG	012B2C10
AUBES2844	360	416.035	11	71.887	CCCTATTCATGTGCGAGTCA	GCCATTTAAGAGCAGCGAAC	003A2D05
AUBES2839	167	312.872	1	25.673	TTCTGACCCTGAGCCATTCT	GGTGCACTCATCTCTGTTGC	031A2G09
AUBES2837	127	358.534	3	81.67	ACGGCATGTAACGAAGGTTT	CATTTGTATTTAAAGCAGCACATCA	020A1B08
AUBES2831	717	471.845	15	49.198	CCCTCATTGCTTGTTCTTCG	CCAGTTCCTCCTGGTGCTAC	009B2C01
AUBES2830	635	461.698	22	66.14	TGTGTATGCCTAGACAACATGG	TGCACTGTGAACAGGAGCTT	046B2A10
AUBES2829	623	390.667	4	58.794	CAGGGGCAGATATGGATGAG	GCGGCAATAAAAATCTGTCAA	020B2E10
AUBES2826	564	345.005	18	31.651	TGTGCAGGTCACGCTCTATC	TACTGCTCAGAGCGGAGTGA	052B2F12
AUBES2824	532	272.283	26	47.785	GAGCAGGTCGTTTGTGTCAA	TGCTCTTTCCAAGCCTTTGT	020A2F04
AUBES2822	482	301.034	20	55.404	CAAAGTCCAGGTCACTGTCAT	GGAACAGGCGAAAGATGTGT	036A1G04
AUBES2819	420	309.49	29	57.529	CCCTCTTCACTGCTGGTGTA	TGTCATGCATATACTACTGCTACAAGA	031A1A08
AUBES2817	395	412.653	22	66.177	TGACTTTGATCATCGCATGG	CTCACAATTTTATTTTGCACCA	034A2F02
AUBES2816	367	272.283	11	41.607	CCCTGGGAGACATGAAAGAC	ACAATGGCCTCTGGTGAGAC	057A2F10
AUBES2815	307	319.637	3	65.405	GCACGACTCAAAAAGCCACT	GCATCAGCCAAATGAACAAA	027A1E08
AUBES2814	268	309.49	5	65.905	AACTGACGGAAGCAATGTCC	CAGGTTCAAAATGAGAGGGAAC	012A2D08
AUBES2812	218	251.989	18	33.505	CGTGGGGGCACTATACAAAT	GCTAGACGAGCTCCGAGAGA	054A2F10
AUBES2811	196	275.666	6	40.83	ATGCGGCATTTCTCATGTCT	CCCACCATTCAGAAGCTGAT	006B2A07
AUBES2809	176	329.784	9	8.55	ATTTACCAACCGCCAGATTG	TTACTTCGTTTTCCCCCAGA	036A1C08
AUBES2808	174	351.77	21	9.473	TGAAGGGGTTTTGTGGTTTC	CCCGCTCTTTTACCATAGCA	054B2H05
AUBES2805	93	204.635	6	40.252	TCCCCACTGTAAGAACCATGA	TCTTCCGGGTTGGTGTTATG	058A2C03
AUBES2802	1353	392.358	8	44.659	TTGGCATCCTTGGTAAATCTG	GCAAAGGGAGGTAGCATTGA	022B1B08
AUBES2801	1208	353.461	8	44.584	TGCCACCCATGCATTTAATA	ACAGTGTGCAGTGTACCTTGTG	040B2A04
AUBES2799	1085	346.696	7	67.267	GCGGTACTGTACTTCCATCCA	GATGACCTTCCATGCCTGTC	029B2A11
AUBES2798	1067	514.125	20	5.628	AGACTGAGATACTAGCGGTGGA	TTCAGGATACCATGCCCAGT	047A1A07
AUBES2795	980	373.755	13	44.237	GCAGCGAGCGTTAAGAGAAT	CAGTACGCCATTGTTCTGCT	002B1E07
AUBES2792	703	250.298	4	57.451	ATACGATTGGGCTGCTTTTG	CCCTGTAGCCATCAACTTGC	050B2C01
AUBES2791	700	544.566	13	20.563	CCTGTGGCTAGATAAACAGAGGT	GGGTTTCAGCAAGAACAACAG	054B1F01
AUBES2789	658	328.093	26	40.633	CCAACTGACATGTTTTCAGGA	TGTTAGAGGTCAAAGATGGATGA	007A1D10
AUBES2788	589	302.725	24	14.425	ACTCCAGGTGAGGGGATGT	TCATTCATCGCCAGATGGTA	055B1A06
AUBES2786	1185	509.051	16	73.337	CCAAGCACTGAAGGTGCATA	ACTGCCCTCTATCACTGTGC	051A1G04
AUBES2783	950	666.333	15	48.576	GCCATACTGCCCACCCTATC	ACATGGTGACGGTGATCTGA	076B2G02
AUBES2779	776	454.933	6	41.869	CCAAAAATTGCCAAAGCATC	TGTCCTACACTGGCACCTTG	006B2B08
AUBES2778	747	703.539	20	56.486	TGTGAGAGCGTAAGGCTGAA	TGAAAACTTTGCCTCATGGA	075A2A11
AUBES2775	631	524.272	13	43.432	GCCATTGGTTCTGCTAATGC	TAAAGGCAGCGAGCGTTAAG	053B1E12
AUBES2773	601	385.594	12	47.14	CCATGTCCCTACAATTGCTGT	ATCCATCCATCCATCCACTC	013B1G07
AUBES2772	597	654.494	1	24.518	GGAAGGCAGCGTCTAGAGAA	CCTTCTCTGAACCTCTGAACC	020A2F03
AUBES2770	505	383.902	25	59.994	CCAGAATTCACACACCATGC	CCAGCTTGAGCTGCTAGGAC	023A2C10
AUBES2769	488	635.891	7	72.196	CCCGTTCAGAGATGTTACGC	GCTGGAAAGATTCAATGTCCA	072B2E03
AUBES2767	446	536.11	14	71.527	AGGAGTAGGCGTCTCCAGTG	TTGACCATTGTTTCCAGCAA	002B1B05
AUBES2764	428	515.816	1	25.134	TGGGACAAGCAGATTGTGTG	GGATAACCGCATGAATGAGC	048B2F11
AUBES2761	344	569.934	13	49.667	GTGGCCAAGGTTGTCTCATC	TTTAGCTGCTGGCACTTCAC	052A2F09
AUBES2759	338	598.685	5	39.105	GGTTGAACCTGAAAAGATTGGA	CATGTAACACTGGCAGTTATGGA	054A2B11
AUBES2758	332	480.301	16	64.279	AAGGCATCAGGATGGATCAG	TCCCTGCTTGATTTAGCACA	041A1G04
AUBES2756	249	365.299	1	24.306	CCAATCTTCCATGCAAGTCA	GAACAGGGATGTGAGGGAGA	019B2A08
AUBES2755	239	564.861	21	20.063	TTAGGCCATAAGCATGCAGT	GGCTTGCACCTTCCAATAAG	035A2F09
AUBES2754	233	424.491	8	52.661	AATCAATGAAGGGCCTATCG	TTGGTGCACTAAGGGGAGAG	029A1C05
AUBES2753	197	417.726	14	54.944	TCAGCCTCCCTCATAACCAC	GCACACAGGGTTGAACTGAC	046A2B03
AUBES2752	187	529.346	15	33.924	GCCAGCACCCTTACAGACAT	CCTCTTTAGGCTCCAGCAGA	047B1C07
AUBES2751	162	492.139	7	70.002	TCACACCACAGAACTGACAGC	CAAGCATGCCTATGTTTGTAGG	038A1E05
AUBES2750	151	585.155	17	5.291	TTGACAAGGGAAATTCACACA	CTCATTTCCACAGTCTCACAGA	062B1B09
AUBES2749	132	674.789	16	63.952	CGTTCAGCAATAAAACGGAAT	CCAAACTCTGACTGAGAGGACA	023B1A06
AUBES2748	128	416.035	3	62.434	ACAGTTTTCCGCCATGGTAA	ACCACTGTTGGGCAGCTAAC	001B2A09
AUBES2746	114	383.902	19	44.01	GGGAGATTGTTGAAAGGGAAT	AGCACATTACTGCCCACCTC	005B1A11
AUBES2740	60	688.318	29	59.677	GGAGTGTGGGCAGTAGATCG	GAAAAGTGCACCGTCCTGTAA	057B2B03
AUBES2737	19	431.256	22	66.259	AACAAACATCCGACCTCTGC	TGGTACACTGAACTGATGGATGA	063A1D02
AUBES2736	12	456.624	23	17.329	CCTCGCTTTCTCTCGTTCTG	TTGACGGGGATTTTAGTTGC	004B2G06
AUBES2735	1	321.328	21	10.659	TGCATTCATGCAAAAAGCAC	CCATGGTTGGTTCTTGGTTC	027A1E06
AUBES2734	466	460.006	6	40.83	GGCGCGTATAAATCACCAGT	CCACTGCACCCATTAGAGTG	026A1G01
AUBES2732	550	524.272	24	31.544	GAACGCTACTGTGGAGCTCAT	AGTGACCAGGTGAAGGATGG	022B2F01
AUBES2731	33	395.741	8	45.362	GCCATGCTTTCATCTCTATCC	GGTGTCTGGCTTGCTTATGTC	022A1H02
AUBES2730	750	444.786	17	5.273	GAACAGCAGCGCATCAAATA	GGTGGACACCAGACACTGAC	021B1B07
AUBES2729	8	279.048	6	41.282	AGATGAGACAGGTAAGCAAGTACA	AGCTCAAAGCAGCTCCAGTC	018B1D06
AUBES2725	118	439.712	15	32.437	GACTTGCCCGAGTGTCAGTA	AAAGCGCAAATTGCTAAGGA	013B1F03
AUBES2724	283	470.154	20	21.522	TTAGACTCCGCAGCTTTGTG	ATGCAACATTCCCTGGATTC	012B2D01
AUBES2722	506	532.728	8	25.059	GGTGGCGACGTGATCTCTAC	CGCTGTCTTTTCTCCTGTGG	012A1H06
AUBES2721	230	356.843	28	0.715	TGTTCCCTGTCACTGGACTG	TTTCCCAAATATTCCCAGTTG	012A1B09
AUBES2720	823	410.962	24	15.102	TGTGAAAAGGATAACTGCATTG	CATAATGAGGAACTGGTCTGGA	012A1A04
AUBES2717	503	596.994	11	44.51	TGTGGTGAGAGGCATATGGA	CGCTCTCAAAGCAGAAGACA	011A1C02
AUBES2716	315	426.182	20	54.617	TGGTCATCTGTGGTGTCTGC	TTTTGCAGGTCCTCCTCATC	010B2D02
AUBES2712	594	476.918	11	43.433	CCCACGGACACACAAATAGA	GCAATGACTGTTTTGCACCA	008A1F01
AUBES2709	1401	624.053	9	9.869	GCCCGACTATGGAAATAACG	TTAACTGCCAAGCCACCACT	006A1D02
AUBES2704	92	368.682	13	51.057	TTATGCTGTGTGTTTGCGTGT	CCCAGCATGAAATAAAAGACC	027B1G06
AUBES2703	17	542.875	11	46.691	GCAACTGAAGTTTGCCTGAA	GCAACAAAGAGAGTAAGGGTTAAG	026B2C08
AUBES2701	643	629.126	20	48.2	TGTTGGGTAAGGAGCCAGTT	TTGAAAACGCTGTTCCTGTG	023A1E04
AUBES2699	259	512.434	29	57.454	TGCACCACTGGACTATGGAG	CTGTAAGCTCACTGCCACCA	019B2H06
AUBES2698	142	417.726	26	45.676	ACGGAAGCTGATTCGCTTAG	GTCGGCGTTCAAAGTTCAAT	019B2G07
AUBES2696	893	666.333	18	30.32	TGGTTTGCATCTTGTGGTATG	GAAAGTGCTTTCACATATCATGC	019A1H02
AUBES2695	690	524.272	1	41.984	ATGGAGCGCTCATCCAGA	TCGGTGGGTCTGTTTGTATTC	013B1C09
AUBES2694	463	448.168	20	18.71	TTGCTGGAGCCTATTTGACA	AGTCATCCCCATGCTTTGAC	012B1H07
AUBES2693	744	515.816	27	41.621	AAGGCCTTGAATCATGTTGG	TCGATTTGACACCTCACCTG	012A2D07
AUBES2692	410	449.859	7	74.174	ATGCACCCGAGGTTTTAATG	ACCCCTTCATGACAACGGTA	012A1G11
AUBES2689	766	505.669	6	38.715	AGAAATCCAGCCACGGAATA	TGCCAGCTTTAAGCCTCTGT	011B1H02
AUBES2686	639	603.758	18	40.121	TCAGTGTTTATTTGTTCCAGAAAATC	CAACATCTGAAGGGTTTTCCA	009A1H01
AUBES2684	147	416.035	28	71.175	CGAAACAGCCAGCTACCCTA	CGTACTGTGTGTGCAGTGGA	007B1E07
AUBES2682	419	524.272	4	58.031	TGAAGCAGTATTCCCGACTTG	TTGCCTTATAAGCAGCAGAGG	006B1E01
AUBES2681	398	761.04	24	19.669	GTTGACGGTGATCGAAGACA	GGGGTGTAGACAGCCCTTTT	006A1D04
AUBES2679	1100	397.432	16	11.4	CACGTCCCACATCTTTCACA	TGAATCAGTGGGCATTCAGA	004B2B07
AUBES2678	36	525.963	13	84.792	ATAAAGTTTCCGACCGCATC	TCTTCACGCTCTTCTCTTTGC	004A1H08
AUBES2677	678	525.963	25	60.581	CCCAAATTCAGAGAGCCTGT	TGTGGTCTTTCTGTAAGGTGTCC	003A2H10
AUBES2676	14	404.197	2	43.299	GCTGGAACGTTTCTGGCTAA	ATCGCTCGCTCTCTGTCTGT	003A1F03
AUBES2672	1018	304.416	7	69.652	ACATTGCCGTATCCACACAG	AATGCCTGATGAGGTTGGAG	053A2H09
AUBES2670	831	412.653	11	44.979	TGACAGAACACAAGGCCAAG	CATAAAATGTCTTGGTGTCATCCGC	045B2C10
AUBES2668	751	390.667	9	9.022	CCTGCAGTGGAAAGGTGTCT	TGTGGCTGATGTCTCCTTTT	064B2F12
AUBES2664	533	476.918	12	43.38	GAATGGTGACCAGCTTCACA	GTCCTCATCTCTGGCCTTTG	022A1B10
AUBES2659	393	285.813	17	5.273	GTGTCAGTGCTTTGCAGCAG	GGAATGTGTGCAAAACAAGC	005B1F07
AUBES2658	372	438.021	24	14.427	AACAGGAGCAATTCTGCAATC	GCACAGCCTTCACTATGCTG	057A2H10
AUBES2656	357	319.637	25	59.994	GCCCTCTGGGAGTTTAAGGA	TGCATGCCAGGATAACAAGA	001B2A05
AUBES2655	333	279.048	26	57.511	GCTTGCTTGGTTATCATGTGC	AACAGGACGCAGCAAAATGT	023A1A09
AUBES2651	192	302.725	28	55.42	CAACCAGAGCAACGAGGTTT	TGGGTAAGCGTAGTGAGCTG	054A1C08
AUBES2650	168	380.52	18	15.281	CGTGTAAGTTGCGGGCTAGT	GGCAAGCAGAAATCTCCAAA	022A1G08
AUBES2645	120	444.786	22	66.289	CGAGACATTTTGTCCCAACA	TGCAAAGTGACACTGAATGCT	023B2H08
AUBES2642	64	306.107	6	40.303	AGCATCACGGAATTCAGCA	TCACAGGCTTCTCTCCGATA	008B2E09
AUBES2641	26	412.653	19	48.199	TTGGTGGCTGTTTGTTTGAG	GGGATCGTGTCTCTTCTACTGC	009B2E10
AUBES2639	9	2005.76	7	66.567	AACCCTCACTAATGGCTAATGC	TAGCAGCAGTGGTTGAATGG	021B2C03
AUBES2638	534	1072.22	5	46.392	CTGCTTGGACTGTGTTGCAT	GCACTCCAGCCAGCTTAGTC	023B2H03
AUBES2637	59	1070.53	13	49.812	TGCACAGAGGCAAAATTACG	GACCAAAGGTTCCCACAAAG	005A1C12
AUBES2636	139	1166.93	17	5.273	CAACGCGTGTATGCATTGTT	TGATAAATCCCACACGTTGC	035B2G10
AUBES2635	166	889.571	22	59.838	TAACGTTTCAATGGGTGCTG	GGTTGTGTGACAAAAACGACAC	009B2F10
AUBES2634	42	1038.4	1	25.472	TCCTGAGCTGCTGTGAGTTG	TGGTGTCCAGGAAGTGTTCA	064B2B12
AUBES2632	45	1119.57	16	73.334	GGAGCTCTGTGAAAAGCTGTG	GACTTGAATCGCTGGGTGAC	074A1C04
AUBES2629	154	1129.72	27	40.061	GATTAAACTAATGGATGGAGAATCG	GCGAAGTCATTCAGCGTTAG	012A1D01
AUBES2627	370	891.262	1	25.697	CCATACCCAGATGTCTGCAA	ATTGGCCCTGGTTATGAATG	035A2A01
AUBES2625	74	899.718	23	25.153	CCAAAGCCGGTACCATAAAA	ACAGCTGTGACGTTGGACAC	008A1A03
AUBES2624	177	881.115	25	60.407	TTGGGGTTTTTACCAAATGAAG	TGTCTGTCCAGCTATCTATCTACCTA	003A2D09
AUBES2623	37	571.626	6	41.062	ACCTAGCGTGGATTCAGCAC	CTGCTTCCGTCCACTCCTT	038B2C08
AUBES2622	104	852.365	15	34.415	TGGTCGAGGTCATTTCTCATC	CAGTAGTTTTAGGCAGCACGTT	014B1B09
AUBES2621	392	1013.03	25	64.148	TGTGGGTTTGAGGGGATTAC	TGAGATAGGCTCCAGGTTCC	053B1B08
AUBES2620	101	926.778	16	69.539	TTCACCCTGCCATGTGATTA	GGGTGGAGTCTTCCTTTAACC	032A2D10
AUBES2619	39	750.893	21	14.573	AATGCCCATTTGTCTTCACC	GCTTGTAAACCAAGCCATCC	006A1A05
AUBES2618	193	867.586	20	11.108	ATGCTTTGACAGATCGCTTG	AGATCTGGCAGTCCACAAGAA	073B2H12
AUBES2617	442	914.939	4	60.807	GGGTCACTAACTCAGGTGTGG	AGGTACAAAATGCCTTGACG	053B2B04
AUBES2616	885	1133.1	17	4.681	ACAAGCCTCGTGGTATGCTC	GCATTGGAACCTTTGTTTCAG	057B2F02
AUBES2615	403	965.675	26	55.036	TCATGATGTTCAGTAAGTTCAAAGG	CATTTGTTGTGTGAGCAACATT	072A2F09
AUBES2613	276	739.054	28	71.636	ATTTCCCCACAAAGGCAAA	TAAAGGAAGCAGGGGGAAAT	004B2B09
AUBES2612	181	695.083	19	34.535	GTGTGAGATGTTGTTTCGTTGAG	GGGACAGCAGTCACACACAC	025A2C11
AUBES2611	241	913.248	16	71.243	GATGGGTGATGAGGGTATGC	GGGTTCCTAAAAATGAAGTGGA	070A1A08
AUBES2610	161	625.744	11	46.559	AACCAATAGACCAAACAAATCAG	GGCACCAATGCCAGTCTATC	006A1G10
AUBES2609	199	683.245	13	47.882	GCACATGACCAGAGCACATT	AGGTTTTTGCCAAACTGCAC	014A1A07
AUBES2608	222	688.318	18	33.395	AAGGTGACTGGATCTTCCACA	AGGTTTTGCACTGTGCTTTG	047B1C06
AUBES2607	183	825.306	21	6.622	AATGCCAAGGGTGTCAGAAT	TCGATTCCTCTCTGCTCACAT	044A2D06
AUBES2606	29	847.291	6	41.062	GATCTTTTTCGGTCTCCCATC	GTCTGCCAACAGGAGTGTCA	060B2H03
AUBES2605	726	745.819	17	5.291	CACATCTCATAGCCTCATACATGG	TGCATCTGCTTCAGGTGTTC	062A1F10
AUBES2604	13	585.155	17	5.273	TCATTGTCTTTAGACTTGCTTGTAATG	ATACCCCAGGGAAATTGGAC	014A1C04
AUBES2603	455	727.216	21	9.563	ACCCACTGCTGGGTTAAAGG	CAATGCATGTGCCGTTTTAT	013A2F02
AUBES2602	278	510.742	6	41.062	GCGCAATGACAGCTTAAACA	TTACACCTGGCGGCATATTT	020B2B02
AUBES2601	20	693.392	11	42.659	TTCCGAAGGAGTCTCCAGTG	GGTTGCAACAGCTACGAACA	053A1A05
AUBES2600	68	668.024	4	58.031	CATAAGTCAAACACCCTGTCCA	GGGCAATGAATTTCCACAAA	025B2C08
AUBES2599	116	620.67	15	34.012	AAGGGCCTTTGTCACATGAT	CACTCCAGTTTCTGGCCAAC	022A2D11
AUBES2597	236	794.864	8	44.584	CAGCAGCTCCAGAAAGAGGT	TCGGCATGCTGCTAAAAAC	034B1A11
AUBES2596	306	588.538	20	55.558	TTTCACCAGCCACTGTTCTG	AATTTCCTGTCACTCTTCTCTCTC	054A2D08
AUBES2595	335	744.128	3	63.714	CCGGGTCTCTCAGTCTCTCA	GTGCAGACATCTCCAACACC	009B2C08
AUBES2594	38	701.848	16	73.72	GCATAAATGTATGTGCCCTGTC	ACCATGGTGAGCAGAAAAGC	018A2A12
AUBES2593	135	618.979	22	63.79	AGGCTAAAATGGCTGGGTTT	CCTGGAAATGAGCTTCATCC	045B2H12
AUBES2592	216	727.216	7	64.722	GGAGCATAATCCCAGAGCAC	TGTTCACCTTTATACTTCCATCTTATT	014B1D07
AUBES2591	404	867.586	22	66.228	GACGCAGCTAAGTGCCAGAT	TGTGCTGGTTAGCCAAGGAT	075B1A10
AUBES2588	169	715.378	16	76.544	TGGTTAGTGTGAGGGGTTGC	AAACAACGTTGGTCCTGTCC	012A1C10
AUBES2583	890	862.512	24	11.249	ACCAGCTTAAGACAGCAGCA	AAGACCTTCTACACTACAGTGATCTTT	032A1H04
AUBES2582	34	490.448	1	0	GCATGGGAGGCATATCTCAG	CTGACCTTCCTGGCTGTTCT	067B2C11
AUBES2581	214	580.082	15	34.628	TGTGTAATGGGATTCTCATGC	CCTCGTGTGGCTAAATGTGA	066A2G10
AUBES2580	436	854.056	10	59.945	TGACATCAAAGATGCCCTCA	CAAGGCGTCAAAGAGGATTC	072A1A03
AUBES2579	609	502.286	12	47.221	CAGGTCCTGGGTGGAATGTA	CAAACAAGCCCAGAACCAGT	012A2E09
AUBES2578	5	417.726	28	60.02	TGGTATTCTCACAAGGCAGATG	CATACCAATTGCAGGTTCCA	055A1B10
AUBES2576	206	657.877	8	10.649	CATGGTCTGAGCCTGAAGGT	ATATTGCCCAGCCCTAATCC	038B1B08
AUBES2571	518	531.037	12	37.095	GACTGGTGATGGAAAAGCTG	GTGGAGATTCACCCCTTCTT	010A2H08
AUBES2570	2	402.506	15	32.185	CCATGCTGCAACATATCCAG	GCTCATGTTGGAGACGTGAA	035A2C05
AUBES2567	790	651.112	17	5.88	TGGCTGATCGGTGTAGAGC	TACTGGCAGTGATTGGCTGA	038B2F10
AUBES2566	1363	940.307	14	54.893	TCCCATGTAATTGCACCATC	CAAAGCCAATGGAAAAGGAA	010A2G07
AUBES2565	107	495.522	22	66.152	GCCAAAGAGCCACTTCAACT	GCTCCTTGTGCTCTCCAGAC	054A2C12
AUBES2564	209	590.229	21	0	CCTGATTCAGAAGTGCTGACC	AGAGACGATGGTGCCACTTT	035B1G08
AUBES2563	246	493.83	24	11.242	TGGCAAACTTTTGTTTGAACC	CATCACGTGAACCAGCTCAT	022B1F03
AUBES2562	275	821.923	7	78.274	ATTAGTGGTCTGGGCGCTTT	GAACAGCAAAATGTCACCAAA	050B1H02
AUBES2561	490	752.584	9	8.536	TCGAGGTGTCCAACAGTGAG	ACAAGAAGTGATGCGCTCTG	025A1E06
AUBES2559	15	539.493	5	41.889	ACATTTCATGCAGGAGCAGTT	TAATTGCAGGGAATGGAAGG	031A2E11
AUBES2557	190	529.346	5	44.434	CGTGTTTGTGTAAATGCGTGT	ATTGCAACTGGGTGAATGTG	003A1F02
AUBES2555	480	708.613	3	64.833	ACTGTTGTTGCTGTTGTTGTTG	GCACAAACTGACAAACAGATTCA	022A2G04
AUBES2553	411	718.76	25	59.994	GGTTAGTGCTGAACGAAATGC	CGTCCAGAGAGAGGAATGGA	012B1G02
AUBES2551	singleton		2	71.908	GGTCCTAATGAACACGACGAA	CTTTGCCGCTAAGTCATGGT	049B2H01
AUBES2550	988	382.211	3	72.32	CACCTCCTTAAGGTGCATTGA	TGTAGACTTGGCCAGAAAGGA	049B2G08
AUBES2549	2481	295.96	18	34.374	AATCCCGCATCTAACCGTAA	TTTACACATTTCTGATGGAAGGAA	049B2D01
AUBES2547	403	965.675	26	48.791	AGCCAGCAGAACAGCTTGAC	GCCTCTCCCTCTCCTCTCTC	049B2A11
AUBES2546	495	865.894	28	71.107	TTCATTGCAGGGTGCCTTAT	GTGGGTTTCCTCCAGGTTCT	049B2A02
AUBES2538	36	525.963	13	83.146	CCTCAGACTCGTGCTCCTCT	TCAAATTTCAAACGTTGACCA	049A2E08
AUBES2532	1056	209.709	8	40.989	TCGGATTCCTCATCATCCAC	ACGGCCAAAGAAACAAACAA	049A1E10
AUBES2530	277	701.848	25	21.545	CAGAAACTCATGTGGCCTGA	GCCTTGCATAAGCTCCTGTC	049A1E03
AUBES2526	singleton		13	109.697	TGACATCCGTTTTGCTTTTG	TGTGTACATGCCCATGTGAGT	048B2F10
AUBES2525	1630	157.282	11	83.912	GCCGTGCCTCTTCTTACTTT	ACACACCCGCAATCTTTTCT	048B2C01
AUBES2523	48	268.901	10	63.507	GAGAGCACACAGACACATGC	AGACTCCTGCCTAGCACCTG	048B2B06
AUBES2522	1152	263.827	15	30.844	TGAGGATGTGATGGATTTGC	CCCAGCCTTAAAGCCTCAAT	048B2A06
AUBES2520	303	279.048	11	44.595	TTCTCAGCAAGATCCAAACAGA	TGGACATTGTCAAAAAGCAG	048B1E02
AUBES2513	838	260.445	24	14.35	TCCCTGATTAATGCCATTCG	GAGAATGCTTGCACATTCCA	048A2F03
AUBES2512	1716	580.082	11	43.905	CTTTGGGGGAACGTCTCACT	TACAGCTCCGGTAGGCAATC	048A2E05
AUBES2511	1692	172.502	21	10.584	TGTTGTCTTGTTGAAAGGGAGA	TGCGCACTTTTCTTACCATT	048A2D06
AUBES2510	singleton		13	105.055	ACGCATGACACACCAGTACA	CATTGCCGGTTTATCGATCT	048A2C11
AUBES2509	singleton		19	39.666	CAACTTTTTCGAATCGTTGTG	CGAGGTGTGAAGCAGAATCA	048A2C09
AUBES2508	1653	394.05	4	87.851	ATTGCAAGGACTGTTGGACA	CACAGGTTGCAAAGTGACTGA	048A2C04
AUBES2505	1431	444.786	4	59.58	TTCCAAACACACAAACTCACC	AAAGTGAGGGCGTGTCACTAA	048A2A05
AUBES2504	825	339.931	7	70.529	TATGAGCGTGTGGTGGGTTT	CACAATGAACTGCCCTTTTG	048A1H02
AUBES2501	274	612.214	18	33.586	GCCATGCGTTCACATGTATT	TGGTTCATGGCCTGTGTATG	048A1C01
AUBES2497	213	317.946	12	50.865	CACCTGACTACATGCACACG	CTCCATCATCCTTCCACAGA	046B2C11
AUBES2492	singleton		6	29.664	TGCGTTTTGCAACACAGTAAC	GTGCCACTTTTCAAGGGTTT	046B2A07
AUBES2491	782	304.416	25	77.078	CCGATCATCCTGATCTCCAG	GCGTTTAACCCTCAAACGAG	046B1F03
AUBES2490	295	358.534	24	5.193	AGTGCGCAGTCTGTGCTG	AAGACACACAGGAGGCCTTG	046B1C02
AUBES2488	singleton		16	46.04	TCCTGAAGGGAAATATTCCTGA	CCGAATGTAAATCGCATCAT	046B1B06
AUBES2484	982	284.122	23	25.074	GATGTTTTCGATTCCAACAGG	CATAAAGGCCGTATGGGAAA	046A2D03
AUBES2481	248	711.995	11	55.189	GCGATTCCATGTTGTCTTGG	CCTGCCAAACATGACACAAA	046A2C04
AUBES2479	1097	219.856	15	11.415	TGTGGAAATGCCTGTTTCCT	CCATTGTCTCAAACGCTCCT	046A1F05
AUBES2478	534	1072.22	5	45.898	CAGCCTGAGGAGACTTGTGA	GGGCACAGCAAAGATTGTATT	046A1E08
AUBES2477	1398	525.963	26	48.687	TCATATGTGCATGGGATTTGTT	CCCATCACTCACACTCTCCA	046A1C04
AUBES2475	144	429.565	25	59.899	CACAGTCTTGGAGGGGAAAA	CCGTTAAGAGCCCTTTCAGA	046A1A12
AUBES2469	116	620.67	15	34.801	GACTTGTGCCATGGTTGTTG	TTGATGAGCCTGTTCCCACT	040B2F06
AUBES2467	singleton		20	58.106	GCAGATTCAAAACCCCAAAA	CAAGCTGTGCTGAAAGCAAC	040B2D12
AUBES2466	1034	309.49	17	5.273	AGTGGTGTTGGGGGAACAAT	TCCCCATCCACCACATAACT	040B2D11
AUBES2463	1300	463.389	19	51.076	ACTTTTCACCGTGTGGGAAT	GAGCACCATCCACTGACAAA	040B2A02
AUBES2459	singleton		4	58.031	CGAGCGTGAGGTTCTTTTTC	CGGCACTTCTATGATGAGCA	040B1G12
AUBES2457	1137	241.842	5	41.467	CGCTCCGTCTTCACTTCTTC	GTTCCCTTAAGCCAACACCA	040B1G05
AUBES2456	526	385.594	14	59.767	CCAATCAGAGCAAGAAGCAA	GTGCCGAGTTGCTGACTACA	040B1F10
AUBES2450	572	270.592	25	56.988	GGGTTTTCTTTCCATGCTCTC	ATCATCTTTGCCTGGCTTGT	040B1C08
AUBES2448	2632	255.371	8	43.882	TCCTCACTCAATTTTCCTCCA	TTTCTCGGATCCATCTGTCC	040B1B11
AUBES2446	2106	184.341	1	26.159	AAATTCGGCCAATGCTACAG	CTTCCAGAACACAGCCACAA	040B1A04
AUBES2444	3325	353.461	10	84.755	CCATGTTTGAACCACAAGTTTC	ACCGGACGAGTGGACTGTAG	040A2H09
AUBES2438	1742	243.533	5	46.012	TGTTTTTGGGAGGTGAGAGG	CCCTCTGCAAGCCATGATTA	040A2E04
AUBES2437	559	326.402	10	51.337	AGACCAGGGGTTCTCAAACG	GCCTCTAATCCGAGGAGCTT	040A2B12
AUBES2433	2327	186.032	14	19.229	ATATCCGCTGGGCAATTCTA	TGTCTCTTCCTGTGGGGAAA	040A1G12
AUBES2431	singleton		16	45.099	GTCACAAAGTGTCGGTCCAG	GGGCGAGTGTGAAAAAGTGT	040A1E02
AUBES2427	94	461.698	4	57.818	TCCCCTCTGTTTCCTGTCTG	TGACAGACCCATGCATTTAATC	040A1D04
AUBES2425	3455	213.091	13	56.795	CAGGTGGATGGATTGTGTTG	GCTCAGTATCTCTGCGCATTT	040A1B02
AUBES2424	2058	196.179	8	44.613	ATGGTCCCCTGCAGTATCAC	TCCCCTTGGCAGGTAACTAA	045B2H06
AUBES2423	136	514.125	3	74.331	TTATCCCTATACACGAGCACATAA	TCCTTGGCATCCATATTTCC	045B2G01
AUBES2422	929	537.802	13	49.812	TGCTGGTCTGCAGTGGAATA	GGGAAGGCCTTATAGAGTTGC	045B2F11
AUBES2421	702	378.829	3	82.001	ATAAGCGGCAGAACAACAGC	AGGAGATCCGTATGGGTTTT	045B2F09
AUBES2420	518	531.037	12	37.011	GGCAGGAGGATAGCAGAACTC	GGTCACATTGTTTGAGCCAGA	045B2F06
AUBES2418	singleton		25	18.024	AAAAAGGTATTAATTTTCACTTCAACA	AAGTCACTTTCTCATGTAAATTTTTG	045B2B05
AUBES2417	singleton		17	5.291	TGCTGTATGCTTCAAAATGAGC	CAGTGTTTTCTTGTGATGCTGA	045B2B04
AUBES2415	singleton		20	6.022	GCCATTGTGCATTGTGTTTC	TGGATGTTTCACTCCAGCAG	045B1G08
AUBES2412	1791	351.77	27	40.065	TGAATAGCCCAGGAAGCAAT	GCAATGAATCCGAGAAACAAA	045A2F08
AUBES2411	1128	515.816	3	79.803	ACCCTGACACAAGCTCAAAT	GAGTGACATCTGCTGGTGGA	045A2F07
AUBES2406	singleton		12	32.051	TCTCGTGTTATCGCAGCTACA	CCACACCAAATTGGCAATAA	045A2C09
AUBES2404	179	339.931	15	15.247	CACAGCAAACTGCCTACGAT	GATCAGCTCTCAGTAAGCGACA	045A2B10
AUBES2403	802	483.683	4	58.031	TTGCTTTTGTTATACGTTGCATTT	AATCTACTCCTGGCGCATTG	045A2A03
AUBES2401	452	329.784	7	65.627	GCAAGCACGTGACTGATTTG	TGACCTTGCTTTCTCTTCATCTC	045A1H07
AUBES2400	1702	182.65	1	5.824	TGCAGTAATCAGTTGTGGGAAT	GCCAAGACTTTTGCACCCTA	045A1G01
AUBES2399	singleton		4	45.301	TGAAAGAATGATGCTTGTGTGA	GCTTGTGGCGTTAAAAGAGG	045A1E11
AUBES2398	3189	314.563	14	9.608	CGCGGGTAACGATGTTTAGT	CTTCTAGAACTTTCCGCACCA	045A1E10
AUBES2397	4	348.387	16	73.425	CTGATTCACCCGAGGAAAAA	ATAAAACCACGCAGGAGGAG	045A1D11
AUBES2392	2065	201.253	17	5.305	AACATCCTCAACTCCACAGAA	TTGAGCATAACTGTAGGGAAAATG	045A1B05
AUBES2391	588	275.666	15	33.935	CGACTGACAGCGGAGATTT	GTCCCAACCTGTGAGCTGTT	045A1B01
AUBES2389	166	889.571	22	69.922	ATGGTCAGATTACCCCAAGC	TTCAACGATCAGCGTTTAGG	044B2B11
AUBES2387	153	416.035	16	73.121	CTGCTACTTTCACCCCGAAA	CACCTGCACCAGAATCACAT	044B2A11
AUBES2386	560	674.789	6	71.577	GGCGCCTTCAATAAATCAAA	TACCGGTATATCGCAAACGA	044B1G11
AUBES2383	singleton		25	3.476	GGCGTGAAGGAACAAGAGAA	AAAGGAGGACGCGTCTACAA	044B1A05
AUBES2379	72	1337.74	9	33.423	TGAGTAGCTCCCAACGATGA	TGCGTACAAGGCCAATTATG	108B1C02
AUBES2375	9	2005.76	28	56.487	GCAGTCCAGAAAAGGACAAGA	CCACCCACTCAAGTTGCATA	044A2A07
AUBES2374	3376	240.15	12	20.619	TTGAAAATGTATTCCAAATAAGGAC	TTGACCATGAATCTCATTTTGC	044A1D03
AUBES2372	142	417.726	26	44.957	CCGGTTATTCCGTGGGTATT	GTCGGCGTTCAAAGTTCAAT	044A1C03
AUBES2371	626	711.995	11	43.12	TACACGACACACGGCTATGG	CACTTTCTCAATCTCTCTCTTTCG	044A1B02
AUBES2369	1045	231.694	22	66.228	TACGGAAGGCTTTGGGTAGA	CGGATTTGGGATAACTCTCG	044A1A08
AUBES2367	singleton		20	39.665	GCCATTAGACAAACCAGATGAA	TGTCCTACCCCACCCATATT	047B2H05
AUBES2358	597	654.494	1	25.766	AAGGCTGTGTCACCATCACA	GCATGAGCGACATGAACTTG	047A2H03
AUBES2357	1492	228.312	15	9.922	CGTTGAGACGTCTTTGTTACG	TCGTTCAGCATAGTGTCTGC	047A2F10
AUBES2355	1920	280.739	29	77.821	AGGGTTCAAAAGTCCACTGC	GCAATTCTCAAATGGGTAAATGA	047A2D10
AUBES2354	1984	419.418	19	43.444	AAACTTTCCAGTCCTTGTTTGTG	GAACGCCTTGCCTCTCTTCT	047A2C04
AUBES2353	singleton		4	18.121	TTCCTTTAGTTCCTGGAAACG	GCGTTCTTATCAGCGGTCTT	047A2B08
AUBES2352	1324	334.858	14	52.799	CTCGTGTGGTCCCCAGTAGT	CCAAAAAGTAAAACTGGTTTCAGA	047A2B01
AUBES2348	1376	272.283	19	34.065	GCAGTGGGTTTTTAGGGTTTT	TCTCCAGTGTCGGTGCATTA	047A1G08
AUBES2347	335	744.128	3	61.748	AGTCAAGCAAAGACGTGTGC	GAGGCCGAAGTGTCTCTGTC	047A1F03
AUBES2344	singleton		15	69.542	CCTGCAGAAACACAAGCAGA	CTCTTGCTGATGGTTCCTTTC	047A1D12
AUBES2343	215	248.606	6	32.144	CGCACCCCTCTTTACAGAAA	TTTGAAAGAGCAGCCACTGT	047A1D11
AUBES2341	639	603.758	18	41.308	TGCTGCTTCGAGATTGTAAAG	GGTGGTGATCCCATACACAA	047A1B07
AUBES2318	690	524.272	7	68.995	CTGTCAATGTGTGGCTCACC	GGCAACCATCTGTGTTTGGT	026B2C07
AUBES2316	2068	253.68	8	123.158	CAAATGTCCACAGGGAGCTA	ACACAGGCATGGTCAGTTCA	026B1B11
AUBES2279	2365	265.518	2	41.897	TCTGCAGAGGTCAGGTAAGGA	CTGCAACGTTCTAGGGAGGT	043B2A03
AUBES2277	27	429.565	12	41.906	GGCTGCTGGGAACTGTAGTC	CAGATGCTCGATGAGCTGAA	043B1G03
AUBES2274	241	913.248	16	71.615	GGTTGCATTCGATTTTTCCA	TGCTCCAAACTGGAGGAGAT	043B1E12
AUBES2273	singleton		27	66.719	CTCGCTGGTGAACTCTAGCA	CAAAAGAAGGTTCGATGAGG	043B1D05
AUBES2271	358	268.901	22	68.347	CCCACAAACAGGACAAGTAGAA	CATTCAGATGCTTTGCAGATG	043B1B07
AUBES2269	319	422.8	5	57.784	CCGACATACACGACTTTTGC	GGGGACAGCAAATTTACACTG	043A2F09
AUBES2267	1034	309.49	17	7.771	GTGCAGTGGAGCAGCAATAA	CAATGACCAGGAGGGTTTGT	043A2F03
AUBES2266	singleton		11	45.566	CACATGAGTGAAACAGCGAGA	TGTCCCACCTTGTTGTATGG	043A2D07
AUBES2263	1931	419.418	8	46.555	TGCAGGAATCATGAAATGGA	CCACATACAAGGCTGCACAC	043A1F07
AUBES2260	1261	382.211	10	31.242	ATTCATCTCGCAGGAAGCAG	TGCTCTGCACTTTTGTTCCA	043A1B01
AUBES2258	145	351.77	2	26.489	TGGAGCAAAACATCCAACAA	GTGACGGGAGAGGATCTCAA	042B2F02
AUBES2257	9	2005.76	8	68.974	CGGAAGCACTAAAACCCAAG	CCCCAAATCAAGTACAGGAAA	042B2D10
AUBES2255	382	554.714	23	9.836	CGGAGTGATTTTCCGTCATT	GTACACTTCCCGCACACACC	042B2B08
AUBES2251	727	199.562	23	25.059	CATATGCACAGACACACATGC	TGTTGAAATACTGGCCCACA	042B2A07
AUBES2245	1727	454.933	19	39.188	GCCCAAGTGTGTGTGTGAGA	GGCCATTACATTCCGACACT	042B1C11
AUBES2237	453	468.462	22	69.474	CACATGGAGCCAATAAACACA	CTTCCCTGAAACTGCTTGCT	042A2E04
AUBES2235	156	294.269	14	50.372	GGCTTACCGAGACTAGGTGCT	TGAGGAATAGTCACTACATGGAGAA	042A2B10
AUBES2232	166	889.571	22	60.626	TGTATCGTAGGACGCCATTT	TGCATTCACAAGGCGATAAA	042A1H02
AUBES2228	172	405.888	13	17.604	CCTGTTTGTTTACCTCATCGAA	AGGGCTCTGAAAGAGTGCAA	042A1D05
AUBES2227	196	275.666	6	41.103	AGGCTGAGAGTCTGTGGTCAG	TCTCTGGCTTCCCTCGTTTA	042A1C09
AUBES2217	360	416.035	11	81.236	AAAGAGAGAGACCGGGAATG	GTCTCACTCTCTCTCCCCATC	032B1D10
AUBES2212	122	361.917	21	16.573	AGGGGGTAAGTAAGCCCTCA	CAATCCTCGGGAGCAATAAA	031B1G06
AUBES2211	1435	202.944	12	26.727	GGTACCACCTTTTCGCCATA	GATATTTCAGCAGGGCAGGA	031B1D12
AUBES2204	1345	197.87	8	79.486	TGTGCTCAGTGGGTTTCACT	GCATTCATTGATTCCATGTCC	030A1D11
AUBES2195	1182	302.725	6	41.101	GTCTCCCCCACCTTATCCTG	GGGGGTTTAGTTGCAAAAGG	028B1C10
AUBES2189	1371	270.592	29	54.427	TGGCTGAATTGTCTGCCTAGT	GGAATATTGTACGCTGCTTGC	027B1H08
AUBES2182	961	250.298	5	67.634	CACACTACAGTGGAGCGACAG	TTAAAAGGGGGCAGAAGGTC	027A2A08
AUBES2163	876	573.317	19	63.172	TCAGGGGTTCCCAAACTTTA	TCAACAATTGGTGTGGAAAA	024B2H04
AUBES2158	634	353.461	13	77.861	CCCCACTGAAACTATAGGAACG	AAACCCACATCTTCATTCTGC	023B2H06
AUBES2152	737	730.598	2	79.895	CGGCTGACTGAGGATTTGA	AATCGCAAGCTGGAGAATCA	023A2A10
AUBES2148	1702	182.65	1	2.959	AAACATTGCGTGAGAGACCA	ACGGATGTGGTGAGCTTCTC	022B2A04
AUBES2147	2009	248.606	20	58.5	CAGCAAGGATATGGGGACAA	GGGAATGACACCAAAGTGTG	022B1C12
AUBES2127	1559	241.842	20	55.418	ATCGTGAACAGGGGACAATC	CACGTCTGCTCTCTAGCAACA	019A2E09
AUBES2124	990	285.813	27	40.246	TTGACTCAATGGGCTTTCTG	AGAGGGTTACACACGGCATC	018B2C02
AUBES2123	646	524.272	11	44.788	CAGAGATGACACTATTGACTTAAAGC	GTCGACTGGAAGAACCCTGA	018B2A11
AUBES2121	726	745.819	17	5.291	GAGCAGTATTGGGGTCCAGA	TCTGTTTGCTGTTAAGTCATTGC	018B1A11
AUBES2117	9	2005.76	27	30.389	CGATATTTCTTACGCTCCACA	TGCTTTGAGACAGCGTCCAT	041B2H10
AUBES2115	singleton		12	47.156	TGACCCTCAGGTCAGTCACA	CACCGAGGATATGTTCGAGA	041B2G01
AUBES2113	2292	147.134	3	76.159	TTGGCCTATCAAAGCACAAA	GCTTCATGCAAGGTTTCCTC	041B2C10
AUBES2110	singleton		1	30.102	TTCAATTCCATCCGATGTTG	CAGCTCTTCAGTCTGCTCCA	041B2B05
AUBES2109	2022	208.018	29	80.066	GTGGCTCAGCTGGGTTTTT	ACCACCAGCAACGTTAGACA	041B2B03
AUBES2108	2205	187.723	17	5.291	TCATCGACCAGGACAAACAA	GTGGATTGCTCAGGTGTGTG	041B2A11
AUBES2104	920	306.107	9	2.554	TGGAATGATACCAGCAAACA	GGGGGAATCATGACAGCTAA	041B1E01
AUBES2103	1401	624.053	9	8.536	TCTGAGCTCTGACCCCAACT	TTTTACACGTGACCAACCTCA	041B1D07
AUBES2102	singleton		18	44.239	GCCGTGATGCTTTAAGCTGT	GCGTGTGCTCGTGTGTTTTA	041B1A12
AUBES2101	1859	270.592	19	26.31	AGGGGTTGCGAAATCTGAC	GGAAAGAAGTGCGTCAAAAG	041B1A07
AUBES2099	1007	879.424	21	17.07	CGGCTTCGAGGAAAGTTTTT	CCACGCTTAAAATCGATACTGC	041A2F10
AUBES2097	1192	216.474	3	68.796	GCATCCTTGAGTTCTGGAAAA	AGTCTGCTGTGGGGAACACT	041A2F01
AUBES2095	1776	573.317	3	77.009	CTCTGCCCTGTGGAAGTTGT	CAGCAGCAGGTGATTTTGAG	041A2D04
AUBES2091	1211	258.754	3	76.934	GCTGTGTGTGCCCTCATCTA	ATGACCACACCCTTCTGACC	041A1H09
AUBES2086	571	588.538	3	73.287	CCACCCCCACCTCTATCTCT	CTCTTTCCCCTGATATTCAAGC	041A1C12
AUBES2085	570	532.728	2	46.519	TGGAGACGTGCTCTAAAACTCA	CAGACTGAGCCACAGGACAG	041A1C09
AUBES2084	935	412.653	4	58.405	ACCCGGAAGAGAAGTGAACA	GTGGACCCAAAAAGGTTACG	041A1B06
AUBES2082	1924	197.87	1	47.832	AGCTGGGGGAAAAGAAGAAG	TATTCCCTCGGACACAAAGC	041A1A08
AUBES2079	442	914.939	14	58.781	TCCACAACCCTAAATGTGGAA	CAGCCTGAAGAGACAAAACG	039B2G10
AUBES2078	1876	299.342	4	58.031	CCACATCAACATTGGACAGG	GGTTGACATTTGGCCTCATA	039B2F01
AUBES2077	2913	170.811	28	66.901	AGGAACTGTGGCATGAGAAA	GAGAGAAGGCCAGAGGTGAG	039B2E11
AUBES2076	2771	233.386	11	44.788	TTCCCGTGTGTGTTATTCCA	TCCTATCTCGGCAAGAGTCG	039B2D11
AUBES2075	194	595.302	12	38.022	TGACCCTGTTTTCCAGCTCT	AGGGTCACATGCCACAAAG	039B2C06
AUBES2074	2953	241.842	25	84.453	CCTCTGCTCGGATAAGACGA	GCATCAAATGACAGCTCGAA	039B2B06
AUBES2072	singleton		16	30.506	CCGAATTTGCATCTTTCACC	GCGCACACACAAAGAGGTAG	039B1H02
AUBES2071	2822	306.107	13	41.393	TTTCCCCTGCTTTCATCATT	TTGCAGCATCTGGAAAATGT	039B1G06
AUBES2070	singleton		7	39.159	TTGCAGGTGTGACTGGATTT	TCCACTCAGATTCCTTGCAG	039B1F05
AUBES2069	singleton		16	73.281	AGCTGTGATCGTCCTGAGGT	AAGGGGCTTGTGAAGAAAGG	039B1D03
AUBES2068	2882	223.238	24	49.004	TGTGCGTTAACTCAAATCCTTG	GCAGACCTGTCGTCTTAGCC	039B1B10
AUBES2067	901	485.374	18	3.277	GGAGGCCCTAAGCTTCATTT	TTTTGATGGGGGACATTGTT	039B1B08
AUBES2062	1098	282.43	6	41.063	CCTATCCTCAAGGCAAGCAT	GCAAGAATCTGCAAAAGAAGC	039A2G08
AUBES2059	959	353.461	20	32.974	CCGCATAACTGGGATCATTT	CGTTTATGTTGGTGCCGAAT	039A2F04
AUBES2057	1909	202.944	8	44.483	TCAAACCAGTGTGCTTTCTCC	CAGCCAGGAGTCCAAACTGT	039A2D12
AUBES2054	1917	167.429	17	5.291	CAGCCGTGAGGTTCAGTCTA	TGACAGCCATGGAATCAGAG	039A2C09
AUBES2052	819	409.27	3	65.219	GAAAAGCCTCCCTCATACCC	CAGCCCAACTACAATGAGCA	039A1H03
AUBES2051	985	573.317	9	8.536	AGTCAGGGCTAAAGCTGCAA	ATATCAGCTCTTTCACCAGCTT	039A1H02
AUBES2050	169	715.378	12	45.465	CAACTGCCATTCTGGGAAAT	AAGTGTTGTGGCTTGAGTGAGA	039A1G05
AUBES2049	2717	148.826	1	25.748	AGGATCACCCAGCTGTCCTA	TGCATCCTACACACGCTCTC	039A1F06
AUBES2047	487	272.283	22	69.922	TGCCCTCTCTTTGCTCTCTC	GCCTCTGCCATTTTTATGGA	039A1C08
AUBES2045	2462	191.106	13	49.894	CGGCTGATGCAGACATAGTG	ATGTGCCAGGCCATGTTTAT	038B2H09
AUBES2039	1221	312.872	13	17.385	CGTTTTCCGTCATTAGACGA	TCGCCAACCCTCTCTTTTTA	038B1H03
AUBES2036	803	258.754	2	52.506	AACGCCGGATAGTGTGAAAG	CGAGTGCGTCTTTGTAATGG	038B1G11
AUBES2034	1264	424.491	6	40.585	CATGTGAGTGAGATGGGCTCT	GCCTGGAGCTTGTGTTTGTA	038B1E03
AUBES2025	371	409.27	23	20.037	GTCCTCTCGGGTCTCCTCTT	CAGACCCACACACACAGACC	038A1D10
AUBES2019	2691	231.694	20	7.344	CCTGGCTCAAAACACAATCA	TGGGGGTTACAATGAACAGC	032A2A05
AUBES2005	3037	306.107	5	45.953	CAGCGAGTCTTGCCTCATTT	TGTGGCTGAATTCTGCTGAT	029A1G07
AUBES2002	579	478.61	17	10.273	CGATAACGGGCTTAATCTGC	CCTGTTAACCTTTGCGGTTC	028B1F05
AUBES1996	2848	202.944	22	66.183	CATCACAGAACCTCCAACCA	TTTGGGGGAAATTCACAAAG	027A2B06
AUBES1995	1970	224.93	1	8.821	ACCCATACCTTGTGCTGACA	ACCCGGACAACATGACAGAT	027A1G08
AUBES1990	2128	204.635	8	37.988	TGATGTAGAAGACCCCCATGT	TGCAGCTCCTAGTGGTATGC	025B2E12
AUBES1982	singleton		17	6.873	AATGACGACCGTGATGACAA	TTTCAAGCTTGGTAAGCACCT	022B2G10
AUBES1980	641	476.918	18	34.248	TCGAGTAAATGATGTTAGCTGAGG	TGGCTATAGTCAGGGGTAAGAGA	022A2G07
AUBES1979	460	690.01	28	11.535	GCGTAAGTGAGAACAGGAACG	TAAACTGCGGAAAACACCTC	022A2D02
AUBES1978	3272	140.37	24	7.181	TGCAACATTTCCCCAAGTTT	GGGGACCTTATGGCACTGTA	022A1H11
AUBES1973	462	356.843	21	10.327	CCAGTCTGGCTATTTTCCTCTG	CTCCTTGTGACTGTGCAGGA	020A2B10
AUBES1971	1299	297.651	19	27.588	CCACCATGTGCCCAGTCTAT	CCAGTCCGACATAGTGAGGA	032B1D02
AUBES1968	39	750.893	22	64.776	GCCTGGTTTTACGCTGACAT	CGCATTGAGCAACTGTGTCT	030A1F10
AUBES1965	704	524.272	14	74.307	TATGGCCAAGGCCGATGTAT	CCCAACAAATGGCAGGTACT	028B1B01
AUBES1964	1536	439.712	26	18.3	TCCTGTTTTCCCTTCACAGC	GCTCCCCATCTCTCTGTTTG	027B1G12
AUBES1963	412	272.283	3	77.64	TCCTGCTCTTGCTGTCTTGA	GAATACTTTCCGGATGCACTG	026B1C03
AUBES1960	1494	241.842	25	65.606	TGAATTAGCCACGACAGACAA	AGCCACCAGAAGGCTAAAGG	023A1D10
AUBES1959	singleton		13	15.683	GCAGCTGCCTATCTGCATTT	GCGATGTTCTTCTGGGTTTC	022B2B02
AUBES1957	131	257.062	28	85.005	TTTGCATGGTACCTTCATGG	CCCCTCGATCTATGCTCACT	022A2H04
AUBES1956	1107	568.243	24	42.167	CAACCGATTGCAGGGTACA	CCCAGTCCAAAGGCATACAC	021B2D08
AUBES1955	singleton		29	42.166	CCACACATGCTTCCAATGAG	GGAACTCGCTGAGCCTTTTT	021B1A04
AUBES1952	1110	512.434	5	40.6	CCCTGTTGCTACCCGTGTT	GCGAACGTGCTAACCACTAA	021A1B04
AUBES1951	1377	263.827	27	51.047	CTGCTGAGATATGGAGGAGGA	CCACCCCTCCCTTTGTTTAT	020B2D10
AUBES1950	singleton		16	64.199	CTACACCATGAAGGGCCAGT	CTGGCCACAGAGCAGAGAG	003B1H09
AUBES1949	327	463.389	10	61.698	AGACCTCCATAGGCCACGTC	CATGCTGCTGATACGACTCC	020B1E12
AUBES1947	1693	495.522	2	4.732	CAGATCCTGATCCCTGATGG	TGGACTCTGCCTTTTGATCC	019A2D06
AUBES1946	759	454.933	19	43.433	TCTGGAAGTGGCAATTAGCTT	AACCCTGCTCTTTCCTGTCA	036B2G11
AUBES1945	103	444.786	21	50.178	TATGGTTTGGGGTTTTGTGG	CTACCGGCTGACACCTTCAT	036B2G10
AUBES1942	302	312.872	8	44.427	GGCTCCAGAGCTCATACAGG	CCTCCCACTTTCCAAAAACA	036B2H09
AUBES1941	973	583.464	22	28.693	TCTCTCTCTCTCTCTCTCTCTCTCTC	TCCTGTCATTTGCATGCTTC	036B2D11
AUBES1936	1471	214.782	15	36.706	CAGTGGGGCTCTGTCAAACT	GTGCACTATGGGGATTTCGT	036A1D09
AUBES1935	466	460.006	6	41.065	AGCCATGACACCTGCTGATT	TGTTGCCAGCACCTATCATC	036A1D01
AUBES1932	singleton		8	15.831	TGTCATTGAGAAACCCTCCA	TTGCTGGTGTTAGATGTGGTG	036A1A09
AUBES1926	787	170.811	4	58.094	CGATTTAACGCAGTGTAATGGA	CACTCACCACTCAGCACAGG	036A2F12
AUBES1924	42	1038.4	1	22.596	GGAAACGAATGGAAAGCAAA	GTGAATTCGCCTCTCTCCAA	036A2D04
AUBES1922	526	385.594	14	63.326	GGGAAAATGCACGAGAGAGA	CCATGAACCCATGAACTTCC	036A2C11
AUBES1918	2101	419.418	8	43.958	CCTGTAGGTGGTCACCCTTG	TCTTCCATGGTTTCTGTCCA	036A1B06
AUBES1916	219	422.8	17	7.237	CAGGGCACTGCATAGCATC	GGCCCATTTGTATTTCTTCTCA	036B2H10
AUBES1912	323	585.155	15	33.902	GAGCAGTGGCCATTTTGTTT	GAAATAGATTGGGGGAAGGA	036B1D01
AUBES1906	363	328.093	15	8.277	GCACCATAACCCTCCTGCTA	AGCGATGAGCTGGTGTTTTT	036B1A04
AUBES1904	384	268.901	11	23.735	CAAGCAGGAATTGTCCATGA	TCCTTCATTCCTCGTGTGC	036A2D12
AUBES1900	2114	197.87	23	45.81	GCACAGGCAAATAAATGCAA	AAGCGCTGACACTGGAGACT	036A2A08
AUBES1896	634	353.461	13	75.915	TTCATTCAGCTTTGCGTCAT	TGGTTTACTTGGGACCATCTT	032B1H04
AUBES1892	181	695.083	19	33.531	GCATCACCATTCGTGGTCTA	TGCCATCAAGCGTTAGCATA	031A1D03
AUBES1891	2357	265.518	26	19.218	CGCACGACTCGGACAGTAAT	GCAGAGAGTCATGTAGGGTGTG	030B1F12
AUBES1888	271	554.714	12	37.903	CCTGTTCCCAGATCAGAAGC	GTGACGGAGCCTGTCTCTCT	029B1H08
AUBES1887	929	537.802	13	48.283	CATGGAAGGAGTCTCCAGTG	CAGCACAATGCAGTTTTGAA	029A2C07
AUBES1886	644	334.858	16	77.54	GGCTCTTGACCTGAATTGTG	GTTGCACTTGATGCAAAGGA	029A1A12
AUBES1885	singleton		10	9.364	ATCCACCCCCTTGTCTGACT	CATCAGGCTTTGAGCAACTG	028B1H10
AUBES1884	80	311.181	6	35.903	CCCAGAAAAGGGATCTTGGT	CCCGTGACCCTGTACGATAA	028B1H01
AUBES1882	singleton		8	45.163	AACAAAGCTTGGCCTTATGC	TTGATGATGGTGCTGGAGAA	028A1F11
AUBES1881	3007	177.576	2	19.369	TGTCACTTAAATCACGGAGGTT	ATCGGGCCTTGAGGTAGATT	027B2B03
AUBES1880	1456	309.49	19	41.659	TTCAGGGTGGTTGTAGAATGC	ATGGGAACCTTTGAAGCTGA	027A1F03
AUBES1879	singleton		21	10.598	TGAAGGTTGACAGCATCAGG	GGTGCATTAACCGTTTCTCTG	026B1F12
AUBES1878	2270	272.283	27	45.773	TGAGGATCAGGCAACATCAG	GAGTCCCTGCTTGCACTCTT	026A2G10
AUBES1877	singleton		23	49.405	CGGCCGTTTATAGCTTCTGT	TGAAGGCAGGATAAGCGGTA	026A2E12
AUBES1876	38	701.848	16	73.721	CCAGCTGAAGTGAGATGGTG	GGTGCTGAAGTGCCAAGACT	026A2A04
AUBES1874	247	471.845	28	88.477	GGATGGGACGTCAATCCAT	CCCACTGTTCAACAACATGC	026A1E04
AUBES1873	177	881.115	25	59.968	CTGCCCTCTGATACCTGCAT	TTGCCTGCTGAACATGATTG	025B1H07
AUBES1872	658	328.093	26	42.968	CTGGAATACACCCTGCATGA	TCCTGAAAACATGTCAGTTGG	007A1D10
AUBES1871	singleton		9	6.956	TTGGATAGCTCACGGTGTATG	CATGGACGCATTGTAGTGTTG	025A2E02
AUBES1869	singleton		15	93.701	TTGCTACAGCTGAGGCATGT	GAGCCGGGTTACACCTAACA	025A1E08
AUBES1868	singleton		2	0.517	GTTCTCCAGGCCCAGTCAT	TCCTCTCCTGAGATCCTTAACA	024B1A09
AUBES1867	37	571.626	10	64.657	TGTTCACACACATTGCTGACA	TCTGGCAACTTTTACAGTGCAT	023B1E10
AUBES1865	1314	569.934	26	31.52	TGAAACTGGATCAGAGGCTTT	CGTGTGGAGCAATTTGAGTG	022B2C01
AUBES1864	77	498.904	11	25.055	CGGTCCACAAGTGGTAAAGAA	TTCCCCGTATGAGTGTAGGC	022B1A02
AUBES1863	singleton		22	62.132	AGTTGTTGTCAGGGGCTTCA	GGGTGCAGTCTATGCAGGTC	021B2H11
AUBES1859	20	693.392	11	40.313	TCACACCATGTGCTTCAACA	TCTGATGCCAGAACTTGTGC	019B1B01
AUBES1858	1123	568.243	25	18.939	GCCTCCATGTCCTCCATTTA	CCTGAACGGAGCAGAGGTTA	036A1G11
AUBES1857	1123	568.243	25	17.426	TCACTCTCCTCTCTGGCACA	CGTTAGGCGTCGGTCATAA	036A1G11
AUBES1856	2410	683.245	13	74.66	GCTGGTTAAGGCACAAATTGA	CCCATCCCACTTTTAAATCC	036B2E03
AUBES1855	1424	487.066	14	60.45	CTTGCCATTTCCCTGCATAC	GGGAGCAGACCAGGTAGACA	036B2C08
AUBES1853	singleton		2	46.536	CTGGAGAAAGAGAATGGAGCA	CTCCCATTCCCCACACAG	036B2A12
AUBES1852	46	334.858	16	83.522	GTGTTTTGGGGGCAGAACT	TCTTTCTTGGGTCATCAATCC	036B1G09
AUBES1847	40	671.406	26	48.83	GCTATTAAAGGCTCGGAAGG	GCCTTCAGCAGGGAAATCTA	036A2B09
AUBES1846	477	329.784	3	62.123	GTCACGCTGATGACTCTCCA	CACTCATTCAGTGACAGGAACTT	036A1C10
AUBES1843	176	329.784	9	7.889	GCGAGTTGGAGACCACATC	ACTTCGTTTTCCCCCAGAAG	036A1C08
AUBES1842	singleton		2	46.163	CCACCTTCCACTCAGGAGAC	GAACATATCTGGGCCTTCCA	036B1H10
AUBES1841	911	509.051	4	57.877	TCAAGGACTTTCCGTTCCTG	TTTGGTGAGAACCCCTGAAG	036B1C01
AUBES1811	3484	238.459	3	48.263	CCTGAACTCACACTGGCAAA	TTCCGTATTCTGGGGTGTGT	033B1A08
AUBES1810	1597	553.022	4	57.92	TGTGCAAAACCAGCACTTTC	TTGCATTTGGCCATGAATAA	033B1A06
AUBES1809	963	392.358	7	69.818	TCATGTCATCCGGTTTGTGT	CGAATGATCCAAAGCCCTAA	033B2D06
AUBES1808	singleton		26	12.043	CTGACGTCCTGCTCTGTTCA	TATGTGGAGACGGGGTCAAT	034A1D12
AUBES1805	328	392.358	7	69.739	ACAGTGCTGGTGATGCTGTC	AGCCTTCAGAGCCATGCTAC	033B2G02
AUBES1803	597	654.494	1	26.773	AAGGCTGTGTCACCATCACA	GCAGTACGACATCCACCTGA	034B1F10
AUBES1801	1227	231.694	23	25.695	GCAACTGGATTATGCAGCAA	GAAACAAAGGCAACCTGAGC	033B2C01
AUBES1798	1992	167.429	25	59.994	AGAGGCTTCAGTGTGACTTGG	TGGATGCAAGTGTGTGTGTG	034B2H02
AUBES1795	670	228.312	4	23.18	GCCGGATCACCATCAAATA	CCACACACTCAGTTGGCAGT	033B1C07
AUBES1794	singleton		13	46.775	CTGCATCAAACCAGCAAAGA	AGACACCCTTATCCACAGCAA	033B1H10
AUBES1793	singleton		6	41.071	TTCACCCTATCAGCCCATTC	CAGAGAGAAGCTTTTTGGTGTG	034B1G12
AUBES1792	2734	258.754	1	42.117	TATGCACACCCAAGGTGGTA	CACCGGGTTTTCTGTCTCAT	033B2A01
AUBES1789	318	453.242	28	6.06	CGGGGCACATCTTACAATTT	CGTGCCATGAAAGATGACAA	034B2C05
AUBES1786	376	392.358	8	44.584	ATCACGGAACACACGTGAAA	TTCAGTCCCATTACACCGATT	034B2C01
AUBES1781	62	317.946	3	62.977	CGAGGCGAGCTGGTTTAATA	TTTACCTCTTTTCCCGCTCA	033A1A07
AUBES1775	697	219.856	15	5.212	TGAGGCAATGTTTGAGCAAT	CAACCCAAAAACAAACAAAACA	034B2A09
AUBES1773	990	285.813	27	40.678	TCAGCTTCCCTGCTTGATTT	CCCAGTGTCCCAAAAAGAAA	033B2D03
AUBES1772	singleton		18	33.632	GCATTTTCTAAATGTGGCGTAA	CAACCCTGGTGGGGTTAATA	033A1H10
AUBES1768	1050	358.534	18	33.734	TCTCAGTTGAGCTGCTGCAT	TATCCCACCCCTTCACAAGT	034A1D04
AUBES1765	941	280.739	11	51.194	GCCCTTGTTTGTTCATGTCC	GGGACCAGGGTAAAGCAGTT	032B2H02
AUBES1764	2495	263.827	12	22.514	CAATGTCGAGGCCAATCTG	AGCACGGAATGACTGCTTTT	032B1H08
AUBES1763	236	794.864	8	45.157	CTGCATGTATGTGGCTCCAG	TCATGGCATGCATACTAACACA	032A2G02
AUBES1761	981	693.392	9	6.856	GAAACACTGGGGATGAGGTG	GCTGCATGTTCCTGAGGAGT	028B1D05
AUBES1759	1396	186.032	20	37.169	GCCCTCTGGCAATAACAAGT	TGGAAGATGGTACGGGAGAC	027B2B05
AUBES1754	51	233.386	26	51.027	AGAGAGGCCTTTTCACAGCA	TGTAAAGTGCCTTGAGAAGCTG	024A1G05
AUBES1752	1339	402.506	5	68.509	GGGAGTACAGTAAACCACTTGC	CTCTTCCCCACCTCCAAGTA	018A1A09
AUBES1750	481	355.152	20	47.561	TCACCATATGACGGAATGGA	CTGCAGCCAGCTCTTTCTTT	032A1F10
AUBES1749	1851	404.197	25	61.452	ACCTTGGAGAGGGAACGTCT	CTGTCTCGAAGCTGTGCTTG	030A1E12
AUBES1748	155	884.498	28	73.639	TGACTGTGAGTAGTTTCCCTGCT	CACCTGCAACTGCACTATGA	028A2F04
AUBES1747	1335	196.179	27	42.015	TTCTGCTCAGAACCCTTTGC	GCAACATGACAACTCGGCTA	074B2G08
AUBES1744	1428	226.621	7	68.295	TTTGATGCTGCTTTCACCTG	CATCCTTCCTTTCCTTCACG	020A1F05
AUBES1742	486	439.712	3	62.897	GCCCAGGGGTCCAATTAC	TGCGTAGGTCAGATCCCTCT	020A1A02
AUBES1740	3	397.432	4	0	AACCCTGAACTTAAAACCCTGA	CAGTGTCAGCATCCAAGAGG	032B2G01
AUBES1737	958	553.022	15	20.736	TGCTCAGCACTGAAATCACA	AAAGCAAGCAGTCATCACGA	031A1F10
AUBES1736	1902	515.816	28	31.045	CCCACCCTATGTCCTTAGCA	GGTGAACAATGGCTGGAGTT	030B1C05
AUBES1733	104	852.365	15	35.839	CGCATCCCAGCGTACAATTA	AACTGACCGGAACTACCTGTG	027A2E05
AUBES1730	1909	202.944	8	44.348	TCAAACCAGTGTGCTTTCTCC	CAGCCAGGAGTCCAAACTGT	026A1G04
AUBES1728	657	424.491	15	35.721	TTGGCCTCTAAATTTGTGCTC	GCATGAATGAGCTCACAAGC	023B1C08
AUBES1727	singleton		27	20.351	CAAAACAGTCCTGGCTGACA	TCGATCCGTGGCCTAAATAC	023A2C12
AUBES1726	609	502.286	12	44.282	GGTACACCAGTCCATTGCAG	CAGTAGGTGGAATGGCCAAA	023A1F08
AUBES1725	217	289.195	12	48.146	CCATGTATCAGGTTTGCACATT	TGTCATGTCAGTTGGAAGCA	022A2H05
AUBES1723	3335	309.49	13	16.091	CGGACGCTCCACATAATCTA	CATGAGCCTGACACTGGAGA	020A1C03
AUBES1721	463	448.168	27	41.544	ACCATCGCACCTAGCAAAAC	AGTTGGAGCCAGGTAAGTGC	019A2F09
AUBES1717	820	605.45	22	66.262	CTACCGGAGTCACATTTCCA	GTTGCGCAAACGAAATACAG	033B2D12
AUBES1714	990	285.813	27	40.061	CCCACCTCATGTCTGTGAGT	TTGCATCCTCTTCCTGCATA	033B2D03
AUBES1710	857	208.018	20	55.417	TGCCTCAAGATGGAGGAATA	AAAGTGCTGGAGTCCTGAAAA	034B1A04
AUBES1704	361	196.179	17	5.291	CAACATTCAGCCAAAAGCAA	GGAAAGAATCCCACACCTGA	033B1H02
AUBES1703	413	380.52	5	47.895	TCCAAGCTCACATTCAGCAC	GCCCCAATTCACTAACAACC	033A2F02
AUBES1702	887	333.166	22	66.268	TCCCGGGATAGTCTCCAGAT	CAACACAATGCCATCATTCC	033B2G04
AUBES1701	1745	167.429	2	42.921	CAGCAAGAGAGGGCACTACC	GCGCCTGTACATAACTGCAA	034A1C10
AUBES1700	418	272.283	21	13.81	ATCGCTGGAAAATGAGATGC	CGACTCTTTGCTGAGTTGGA	033B2B02
AUBES1699	141	319.637	19	41.158	GCACGTTTTATTTCGGGATT	ACGCAAAAAGCGACATTTCT	034A1H04
AUBES1697	1459	334.858	3	65.579	CAGCACACGAAATTGTCCAG	TGGAGAACACAGAAAATCTTGC	033A2C01
AUBES1691	350	317.946	1	25.695	TGTCATGTACAAGAGCAACCTC	CACTCCTCCCTCTGCAACTC	034B2C08
AUBES1635	314	556.405	8	49.629	ACTGTGTTTGCCCAGGTGTC	CAGTGGAATGTCCTCACAAGG	023A1B02
AUBES1630	3093	287.504	5	62.994	GAGCGCGAAGGTAAGAGTTG	TTCCCTGTCTGAGCGAGTCT	032A1H08
AUBES1629	1214	512.434	21	8.758	CACGCCTACAAAACTCCGTA	CAGAGCACTTGCATCAGGAG	031A2A05
AUBES1626	singleton		3	67.451	AGTGATTGCACATTCACAAGG	TGGTACACGATCATCTTCCTGA	027A2E03
AUBES1624	103	444.786	21	59.123	AGCACTAAGCACAGGTGCAA	CCTCTTTTAGGTCGGCTGAA	023A2H12
AUBES1619	3375	260.445	18	20.631	CACCGGAGACAATGTACTGG	GCGAGATACTGCCGTTTGAT	020A1A11
AUBES1617	3092	180.958	4	58.322	GCGCTCCTCAGTCTCTCATT	AAACTGCGTCGAGTTCCACT	026A1G03
AUBES1616	singleton		6	8.219	ATGGATCTGGCACAATGGAT	TGGATCAAAGTCCCCAATTC	026A1G06
AUBES1615	570	532.728	2	46.663	TGATGCCTGGCTGAGAGATA	TCCCTTAAAGCCCTCAATCA	024B1H04
AUBES1612	singleton		11	71.344	TACCAGCCTTCCAAGCATTC	GTCTCTTTTCGGTCCAGACG	024A2B01
AUBES1610	314	556.405	8	43.688	ACTCGCTGAAGAAGGCATTT	CGCTCACTACATAGGGCATGA	021B1A10
AUBES1607	1299	297.651	9	6.884	CCACCATGTGCCCAGTCTAT	CCAGTCCGACATAGTGAGGA	032B1F02
AUBES1606	301	378.829	23	22.632	GGTTAAACAGCTAGGTGCACTG	ACAGCCAGATGATTTCCAGTT	031A2G03
AUBES1600	singleton		9	6.24	CTCCCTTCACAAGCTGTTCA	CCGGGGCTTCTATAGCACAT	024A1A03
AUBES1597	2328	454.933	1	49.523	TGGAGCAAACAACGTTTGAG	AAAGCGATTCCCCATCATC	023A1A10
AUBES1595	singleton		26	41.624	GGGTGCAATTTTTCACATGG	CATGGGCATGATCACAGACT	021A1F09
AUBES1594	3393	302.725	13	56.795	AAATTAGGCCACGTGTAGGG	CCCTCAGTGTTGTGAACCTGT	020B1E04
AUBES1593	1912	262.136	22	62.938	AATGGCATTTGGCTGAAGAG	CATTGCCTCGTCCAGAGAATA	029B2E02
[truncated: 101 more rows]
