# Supplementary material for: Second-Generation Genetic Linkage Map of Catfish and Its Integration with the BAC-Based Physical Map
Source: G3 (Bethesda). 2012 Oct 1;2(10):1233–41. doi: 10.1534/g3.112.003962 (PMC3464116; doi:10.1534/g3.112.003962)
Supplement: Supporting Information [file supp_2.10.1233_TableS2.xlsx]

## Sheet: Sheet1
Table S2: Ratios of physical to genetic distance across all 29 LGs. Ratios were estimated based on the difference of the physical distances (Kb) and genetic distances (cM) between multiple BES markers mapped from the same contigs.
LG	Ctg	Markers (AUBES)	Kbp	cM	Kb/cM
1	1702	2148-2400	171	2.9	59		Average Kb/cM:		455
1	767	3565-3566	157	2.2	71		Min Kb/cM:		4
1	2142	3992-3993	259	2	130		Max Kb/cM:		4830
1	2276	4540-4541	215	1.6	134
1	42	1924-2634-3108	961	6	160
1	597	1803-2358-2772	502	2.3	218
1	772	3567-3568	189	0.6	315
1	2439	1075-4414	347	1	347
1	316	3178-3209	573	1.3	441
1	949	3451-3452	162	0.2	810
1	468	3420-3421	179	0.1	1790
1	370	2627-3160	592	0.3	1973
1	2239	3745-3752	249	0.1	2490
1	1940	4860-4861	154	0	NA
1	1272	4436-4437	162	0	NA
1	351	3403-3404	216	0	NA
2	3007	1881-4698	176	8.4	21
2	343	2884-3952	166	7.4	22
2	145	2258-3394-3395	266	7.9	34
2	337	3625-3626	249	3.9	64
2	407	3627-3628	166	1.3	128
2	1706	4456-4457	232	1.7	136
2	1513	4162-4163	396	2.9	137
2	121	3184-3215	649	3.2	203
2	1693	1947-4170	247	1	247
2	1930	4848-4859	279	1	279
2	14	2676-3238	266	0.8	333
2	998	4434-4435	157	0.1	1570
2	570	1615-2085	178	0.1	1780
3	919	3771-3879-3880	223	6.8	33
3	377	3544-4350	228	5.3	43
3	477	1846-3491	259	4.4	59
3	335	2347-2595-3139	338	4.3	79
3	97	3074-4343	193	2.4	80
3	227	3065-3536	289	2.3	126
3	2932	4875-4876	164	0.7	234
3	480	2555-3327	201	0.7	287
3	789	3646-3647	216	0.7	309
3	702	3443-3444	203	0.4	508
3	1893	4578-4593	159	0	NA
4	703	2792-3312	161	2.7	60
4	442	2617-3154	440	2.2	200
4	623	2829-3306	242	0.7	346
4	676	3638-3639	303	0.8	379
4	94	2427-3012	127	0.2	635
4	787	1926-4083-4084	142	0.2	710
4	1487	3607-3608	159	0.2	795
4	3120	4708-4709	179	0.1	1790
4	1431	2505-4270	210	0.1	2100
4	2233	1555-4869	157	0	NA
4	557	4070-4071	200	0	NA
5	95	2982-3940	242	6.2	39
5	961	2182-4127	206	3.6	57
5	1110	1952-2993	284	4.1	69
5	2861	4685-4686	164	2	82
5	1002	4528-4529	205	1.8	114
5	341	2883-3002	490	2	245
5	2839	4425-4440-4441	183	0.7	261
5	1209	3594-3595	375	1.3	288
5	427	3629-3630	169	0.4	423
5	534	2478-2638-3170-3237	720	1.5	480
5	1044	3695-4244	151	0.2	755
5	853	3445-3446	369	0.4	923
5	190	2557-4346	173	0.1	1730
5	3037	2005-4700	304	0	NA
5	339	3402-4349	178	0	NA
5	1234	3596-4374	169	0	NA
6	1894	3701-3784	191	13.4	14
6	530	3004-3954-3955	174	4	44
6	974	3798-3799	220	4.8	46
6	93	2805-3280	142	2.7	53
6	346	2987-3255	296	4.7	63
6	786	3792-3793-3794	208	3	69
6	766	1306-2689	173	2.1	82
6	590	3433-3434-3664	223	2.7	83
6	1090	3591-4371	233	2.3	101
6	278	2602-3355-3384	208	1.8	116
6	776	2779-3690	184	1.5	123
6	1182	2195-4143-4144	301	2.1	143
6	229	3397-3398	230	1.6	144
6	2533	3844-3845	140	0.7	200
6	1098	2062-4003	228	0.9	253
6	193	3097-3155	247	0.8	309
6	37	1185-2623	225	0.7	321
6	1369	3777-4108	238	0.7	340
6	1058	3804-3805-3806	360	0.8	450
6	645	3789-3791	391	0.7	559
6	171	3514-3681	306	0.5	612
6	3026	4802-3852	191	0.3	637
6	196	2227-2811-3282	193	0.3	643
6	466	1935-2734-3016	445	0.5	890
6	29	2606-3359	595	0.3	1983
6	1031	3457-3458	159	0	NA
6	1455	3698-3892	151	0	NA
6	2630	3899-3900	203	0	NA
6	1635	3613-3614	377	0	NA
7	369	3408-3409	264	7.4	36
7	690	2318-2905	161	4.3	37
7	275	2562-3056	386	9.6	40
7	963	1809-4667-4668	191	3.5	55
7	9	2639-3703-3744	254	3.2	79
7	986	4134-4135	174	1.8	97
7	267	3399-3400-4348	208	1.9	109
7	608	2897-2898	337	2	169
7	1016	4097-4098	359	0.2	1795
7	328	1805-3718	318	0.1	3180
7	429	3487-3488	294	0	NA
7	216	2592-3136	196	0	NA
8	376	1786-2886-3256-3257	240	8.2	29
8	780	1283-1287-3569-4366	220	4.8	46
8	1907	4400-4401	257	5.5	47
8	159	3115-4345	213	4.2	51
8	314	1610-1635	352	5.9	60
8	2866	4426-4427-4442-4443	174	2.5	70
8	375	3747-3750	189	2.5	76
8	1208	2801-3321	127	1	127
8	189	3203-3326-3380	485	3.4	143
8	885	3194-3365	403	1.4	288
8	236	1763-2597-3717-3749	178	0.6	297
8	2128	1353-1990	149	0.5	298
8	455	3144-3357	127	0.2	635
8	388	3484-3485	201	0.3	670
8	1353	2802-3322	145	0.2	725
8	1909	1730-2057	201	0.1	2010
8	895	3573-3574-4367-4368	331	0.1	3310
8	443	3051-3324	394	0.1	3940
9	176	1843-2809-4659	161	14.3	11
9	72	2379-3199-3229-3230-3653-3713-3716	1049	29.4	36
9	1684	3781-3818-3819-4280	233	2.4	97
9	154	3105-3162	397	1.9	209
9	1401	2103-2709-3720	401	1.3	308
9	490	2561-3055-3118	524	1.4	374
9	981	1761-3533	612	1.6	383
9	409	1410-4060	198	0.3	660
9	985	2051-3048	257	0.1	2570
10	89	2863-3939	252	4	63
10	111	3942-3943	166	2.5	66
10	559	2437-3302	167	2.4	70
10	1315	3600-3601	216	2.3	94
10	904	3317-3739	189	1.8	105
10	381	3412-3545	156	0.6	260
10	37	1867-3225	271	0.7	387
10	625	3500-3501	191	0.4	478
10	458	3631-3632	244	0.5	488
10	436	2580-3070	663	0.6	1105
11	793	3648-3649	228	20	11
11	360	2217-2844-4192	298	9.3	32
11	941	1765-3577	266	7	38
11	41	2859-2979	255	1.6	159
11	1178	4372-4373	139	0.8	174
11	20	1859-2601	413	2.3	180
11	225	3473-3474	184	0.8	230
11	161	2610-3090	435	1.6	272
11	646	2123-3527-3665	271	0.7	387
11	801	3867-3871-3872	205	0.5	410
11	1743	4293-4294	222	0.5	444
11	471	3424-3425	250	0.3	833
12	169	2050-3345	220	16.3	13
12	1552	4838-4839	245	7.3	34
12	609	1726-2579-3233	95	2.8	34
12	1800	3469-3470	235	4.8	49
12	441	3416-3546	281	4.5	62
12	596	3496-3497	232	3.6	64
12	828	4232-4233	137	1.8	76
12	1646	4383-4384	211	1.7	124
12	271	1888-3049	142	0.8	178
12	217	1725-3542	220	1.1	200
12	194	2075-3342	337	0.9	374
12	3196	4713-4714	299	0.2	1495
12	518	2420-2571-3124	331	0.2	1655
12	601	2773-3708	257	0.1	2570
12	897	4887-4888	203	0	NA
12	1073	4101-4138	137	0	NA
13	1131	4006-4007	223	6.2	36
13	738	3557-4362	216	5	43
13	929	1887-2422-2908	369	3.8	97
13	416	4516-4517	228	1.9	120
13	634	1896-2158	277	1.9	146
13	199	2609-3089-3702-3149	446	3	149
13	1246	4149-4150	318	1.5	212
13	401	3486-3555	222	0.9	247
13	59	2637-3110-3678-3734	448	1.6	280
13	36	2538-2678-2977	501	1.6	313
13	1221	2039-4017	225	0.7	321
13	652	3439-3440	323	0.8	404
13	92	2704-2864	218	0.5	436
13	700	2791-3311	211	0.1	2110
13	79	3392-3393	228	0	NA
14	156	2235-3615-3616	225	8.6	26
14	710	3640-4361	282	4.3	66
14	3090	4430-4431-4447	156	1.8	87
14	1324	2352-4154-4155	284	3.2	89
14	526	1922-2456-3426-3549	326	3.6	91
14	595	3435-3436	279	3	93
14	1989	4604-4605	174	1.7	102
14	704	1965-3957	166	1.6	104
14	1046	3584-3585	453	0.8	566
14	2508	4871-4872	291	0.5	582
14	175	3617-3618	222	0.2	1110
15	208	3619-3620	194	14.7	13
15	76	2861-3937-3938	117	4.8	24
15	717	2831-3314	225	6.3	36
15	588	2391-3431-3432	186	3.5	53
15	514	2891-2999	218	3.8	57
15	28	3506-3507	337	3.9	86
15	214	2581-3071-3131	399	3.6	111
15	323	1912-2881	299	2.5	120
15	818	3736-4124	157	1.2	131
15	34	3072-3728	144	1.1	131
15	671	2903-3265	139	0.7	199
15	958	1737-3040	296	1.3	228
15	104	1733-2622-3100-3158	624	1.7	367
15	116	2469-2599-3191-3354	413	0.8	516
15	363	1906-3407	286	0.1	2860
15	869	3873-3875	157	0	NA
16	435	3014-3723	181	16.2	11
16	1100	2679-2910	360	11.4	32
16	1062	3586-3587	303	3.7	82
16	38	1876-2594-2978-3348	700	7.8	90
16	101	2620-3196-3224-3368	518	3.8	136
16	1956	4628-4629	255	1.7	150
16	900	4432-4433	216	1.1	196
16	153	2387-3249	151	0.6	252
16	6	3190-3219-3353	291	1	291
16	241	2274-2611-3151-3362	649	2.1	309
16	644	1886-3637	215	0.1	2150
16	2920	4428-4429-4445	267	0	NA
17	987	3579-3580-4369	250	6.3	40
17	1509	3465-3466	374	3.5	107
17	1034	2267-2466-3583	269	2.5	108
17	454	3346-3347	200	1.8	111
17	604	3437-3551	181	0.8	226
17	2476	4415-4416	277	1.2	231
17	1988	4402-4403	189	0.6	315
17	790	2121-2605	435	1.3	335
17	885	2616-3221-3222	521	0.6	868
17	2065	2392-4323	161	0	NA
17	180	2873-3947	216	0	NA
17	386	4663-4664	152	0	NA
17	13	2604-3085	157	0	NA
17	139	2636-3168	494	0	NA
17	726	2121-2605	438	0	NA
17	1575	3609-4375	222	0	NA
18	632	1539-2900	129	5.9	22
18	168	1325-2650-4182-4183	367	13.1	28
18	222	2608-3088-3361	616	4	154
18	564	2826-3303	211	1.1	192
18	200	3161-3391	392	1.2	327
18	639	2341-2686	534	1.2	445
18	274	2501-3208	242	0.3	807
18	406	3414-3415	161	0	NA
18	918	3449-3552	267	0	NA
18	603	3263-3689	140	0	NA
19	876	2163-3770	331	1.5	221
19	181	1892-2612	240	1	240
19	141	1699-3755	198	0.7	283
19	1984	2354-4863	418	1.1	380
20	130	3133-3234-3382	242	13.8	18
20	481	1750-2889-2990-3746	266	4.5	59
20	1029	3801-3802-3909	286	3.4	84
20	1273	4020-4021	137	1.5	91
20	306	2596-3079	391	1.4	279
20	744	3270-3741	215	0.7	307
20	580	1338-3494	227	0.7	324
20	873	4236-4237	166	0.1	1660
20	263	4660-4661	186	0.1	1860
20	281	3227-3228-3390	966	0.2	4830
20	1067	2798-3320	198	0	NA
20	1502	2996-3009	232	0	NA
20	1490	3463-3464	164	0	NA
21	1001	4095-4096	179	4.3	42
21	103	1624-1945	428	8.9	48
21	2092	4404-4405	286	4.5	64
21	1214	1502-1629	176	2.1	84
21	455	2603-3084	173	1.7	102
21	212	2874-3948	225	1.7	132
21	418	1700-3295	194	1.4	139
21	209	2564-3336	396	2.4	165
21	182	3142-3218-3352	594	2.5	238
21	1695	3971-3972	240	1	240
21	183	2607-3087-3147-3360	622	2.3	270
21	242	2876-3001	389	0.6	648
21	742	3642-3643	184	0	NA
22	166	2231-2389-2635-3109-3167-3378	822	11.4	72
22	1017	3456-3553	193	2.4	80
22	973	1448-1941	233	2.7	86
22	1496	3814-3815	225	2.5	90
22	453	2237-2888-3719	330	3.5	94
22	358	2271-3405-3406	216	2.2	98
22	240	3518-3519	328	3.3	99
22	252	3163-3198	467	4.4	106
22	135	2593-3187	387	2.4	161
22	39	1968-3156	132	0.3	440
22	1341	4025-4026	240	0.1	2400
22	107	2565-3059	364	0.1	3640
22	1642	4844-4845	269	0	NA
23	2855	1411-4683	178	7.8	23
23	1351	1328-4031-4032	240	7.3	33
23	2114	1900-4327	120	2.5	48
23	382	2255-3046	313	4.3	73
23	74	2625-3102-3159	558	6.6	85
23	211	3188-3217-3657	539	4.3	125
23	1697	4289-4290	220	1.7	129
23	1040	4136-4137	362	1.8	201
23	1465	4115-4116	350	0.2	1750
23	982	2484-4132	218	0.1	2180
23	2434	1330-4412	156	0	NA
23	1229	4147-4148	232	0	NA
24	295	2490-3481	216	9.7	22
24	246	2563-3206-3335	279	3.7	75
24	2094	4864-4865	311	3.5	89
24	398	2681-3711	521	5.6	93
24	695	3502-3503-4360	426	3.2	133
24	838	2513-3693	169	1.1	154
24	890	2583-3073	502	3.2	157
24	823	2720-3041	252	0.1	2520
24	589	2788-3305	181	0	NA
25	81	4179-4180	223	8.7	26
25	1123	1857-1858-4141-4142	370	7.8	47
25	1851	1749-4284	134	1.5	89
25	678	2677-2904	186	1.6	116
25	599	1570-3032	250	1.6	156
25	177	1873-2624-3101	805	4.4	183
25	392	2621-3099-3157	839	4.2	200
25	1507	4450-4451	167	0.2	835
25	572	2450-3042	198	0.2	990
25	451	3419-3547	129	0.1	1290
25	1348	4028-4029	244	0.1	2440
25	144	2475-2869	247	0.1	2470
26	2357	1891-4410-4411	257	10.3	25
26	658	1872-2789	206	2.3	90
26	403	2547-2615-3095-3153	830	6.7	124
26	1621	4218-4220	254	1	254
26	142	2372-2698	184	0.7	263
26	40	1847-3091	232	0.6	387
26	1536	1964-4836-4837	387	0.9	430
26	1093	3592-3593	186	0.3	620
26	399	1333-4877	205	0.1	2050
27	463	1721-3260	208	9.4	22
27	1377	1951-4109	247	6.6	37
27	1551	1547-4378	176	4.2	42
27	9	2117-3231	419	9.9	42
27	1335	1747-5053	173	1.4	124
27	154	2629-3372	183	0.6	305
27	990	1714-1773-2124	284	0.6	473
27	1387	3021-3737	369	0	NA
27	844	3571-3572	161	0	NA
28	581	3430-3550-4355	220	62	4
28	762	3563-3564	200	5	40
28	622	2899-3007	482	10.9	44
28	5	2578-3068	308	5.8	53
28	147	2684-2870	335	5	67
28	262	1146-3179-3340-3341	521	6.8	77
28	138	4655-4656-4657	238	1.9	125
28	437	3686-4061-4062	164	1.2	137
28	318	1789-3288	169	1	169
28	582	2895-3956	692	2.7	256
28	155	1748-3094-3152	720	2.2	327
28	1076	3589-4370	360	1.1	327
28	1918	4581-4582	247	0.6	412
28	2913	2077-4788	162	0.2	810
28	951	4890-4891	159	0.1	1590
28	276	2613-3193-3364	416	0.1	4160
29	261	3478-3554	100	0.4	250
29	259	1305-2699	364	0.8	455
29	770	3644-3645	167	0.1	1670
29	60	2740-3726	222	0.1	2220
29	294	3623-3624	166	0	NA
