# Supplementary material for: Second-Generation Genetic Linkage Map of Catfish and Its Integration with the BAC-Based Physical Map
Source: G3 (Bethesda). 2012 Oct 1;2(10):1233–41. doi: 10.1534/g3.112.003962 (PMC3464116; doi:10.1534/g3.112.003962)
Supplement: Supporting Information [file supp_2.10.1233_TableS3.xlsx]

## Sheet: Sheet1
Table S3: Detailed primer sequence information regarding mapped markers
Marker	Forward primer	Reverse primer
AUBES5416	TTGTGTCTTGTGGGCTATGTG	AAGGTGGGTGAAAGAGTAGTTACAG
AUBES5415	GATGACGACGCTCTGGAAAT	GGAATGAAAGACAGAGCGAGA
AUBES5414	AACCACTGTCCTGAGGGATG	GATATCCTCGGGGAATAGGG
AUBES5413	GCGTGGTCTTTGTACTGTGG	AACTGTCGTTACTAAAAGGCTCA
AUBES5412	GGAGCTGCAATAGGGCTTT	TTGAAGTCTGAATTTGCTGCAC
AUBES5411	CTTCCTGTCCACCAGAGAGC	ATTCTCCTGGTGCTCCCAAT
AUBES5410	TGAGCTTCTACTCAGCTGTTGG	ATCACGCAGCTGCCTAAGTT
AUBES5409	AGTGGCACACTGCACAAGAC	TGGGAGGAAACAGTGTCAAA
AUBES5408	AACTTCCAAGCAGTGCGGTA	CGAGAGCACTTAAACCCTGAA
AUBES5406	GAGCTAGCTAGGCAGCATGAG	CAGGTTACCCCGCTAGCTAGTAT
AUBES5405	ACCAGAGAACAGCCGGTAGA	GGACCTCGGGATCGTTATTC
AUBES5403	CGAACGTCTTTGAGTTGTTGT	TGGAAATCTCCTTTTCCAGGT
AUBES5401	AAGGTCACGGCTAGGTCAAA	TATCCGCTGGGCAATTCTAT
AUBES5399	CAGAATACGGCCCAGACATT	CAGCCTTTCTGGAGCTTTGT
AUBES5397	GGATCCTGCACTCAGTCGTT	CAAGAGCATCCACTCACCAA
AUBES5395	GAACCCATCACTTTGTCACG	TCTTATTTCCCCAAAATCAATCA
AUBES5394	ACGGAGACGAGGGAGAAAAT	ATCTTGTTTCCCGGTGAATG
AUBES5393	ATGCCACAGTGATGGAATGA	ATCGCACCGAGAGAAGAGAA
AUBES5392	CGAGGAACAATTCGGGTCTT	TCCCTGCCACTTCAGAAGATA
AUBES5391	AGGCATTTCCTTCACTGTGTC	CGACAGTTAGCCAGCTCAAA
AUBES5390	TCATCCCAAGACAACCTGAAC	GACCCCTTTCCCAGATCAAG
AUBES5389	GTGCAGTGCGTGTTCAGTTT	CAGCGTCTAACAGCACACAAG
AUBES5388	ATGGAGGCACAAAAAGCACT	GCGCAAACTTTCAGTACCAC
AUBES5387	AGTCAGTGCAGCTGGTTCAA	GGCCATTTGCCTTAATGTCT
AUBES5386	TGTTCCTGCTGTCTGAGCTTT	CCTCAGTCCTTCCTTCTTGCT
AUBES5384	TACAGGTGAGGGGGTGCTTA	CATATTAACCAAGGGTGCCAAT
AUBES5383	CCCTTTGGGACCACTATCAA	CGACGGCAGATAAATCCAGT
AUBES5382	TTGGCACCATTCTGTTTCAC	AATGCCTAGGTCACGGTTTC
AUBES5381	TCATGCCACTGCTTCGAATA	CAGCCCATAAAGAGGTGCAT
AUBES5380	TACTGCCACTTGAGCGACTG	GCGTCTGAAACAGAAGCAGA
AUBES5379	TGTCCGCATCTCATGTCATC	ATTGTGCTTCATGTCGCTTG
AUBES5377	TTGCAAACAGCTGAAAGTCTG	CGCAAGGTCACAAATGAAGA
AUBES5375	GCCTCCTGACCAATCACAAT	TCACGGTGCTCAAGTACTGC
AUBES5374	AATGCAATATGCTTGACAACCT	TGCATATATCCACCTTTGCTT
AUBES5373	TTGGATTTGCTTGCCTACCT	GGAGCAAGTGGAGGAGTTGA
AUBES5372	CTTGAAGTTGGTGGAAAACAA	AAGTTCATGGCACTTGCTACA
AUBES5370	TCAGGGACTTCCACTCAAAAG	AGATTCTTGGACCCCACTGT
AUBES5369	AACTCGTACCGAGACGAAGC	GATGAAGCGTGTTTCACAGC
AUBES5368	GTGTGTCAAAGAAGGTCACGA	CGAAGCCGGTCTGAAAGTTA
AUBES5366	GGATCCACCATACAGAATCCA	ACAGCCAGCTCAATGTTGC
AUBES5365	TGCACTTGGTTGATATTGGAA	GGACGCCACAATTTTCTGTAA
AUBES5363	CGTAGTTTGGTTTTCGTTATAGG	CGATATGAACGCGAACATTAAA
AUBES5362	CTGGACGAGCTCCAGGTAAC	TCGCTCACCTTGATCTATGC
AUBES5361	CGAGGGGGAGAGACACATAC	CCGTTCTGCCTGTTTTGAGT
AUBES5360	AGCCACCGCTTCCTCTTAAT	GACAGGGATAGGCTGGTGTG
AUBES5359	CACTGTCAAGCTGCAAAAGC	TGATTCAGTCTGCTGCTTGG
AUBES5358	TCGCCAATATATTACAGCATGAA	TGCTGGATCAAGTGCTATTCT
AUBES5357	CACATTCATGCAGTGTTTGG	CCTTGCTTCCCTGTTCAGAC
AUBES5354	CTGAAGCCAGTTCTCCTGTG	CAGCATGTGAAGTTGTGTTGG
AUBES5353	CAGATATCCATCTCTGTCCATCA	ACAGACAGACCGGCAGATG
AUBES5350	TAACCTGGTCCCAGATTTGC	TTGAGTAGTAATGTTGAGTAATGCTGA
AUBES5347	TAACAAATGAATGGGCGAAC	GATCCCTGGGGAGAAACACT
AUBES5346	CATATTTGGCGATGTTTCCA	TGGGAAATTCCTCCTCTCCT
AUBES5345	GCAGTGAGCTGATGAGGATTC	TGCGCATTAAAATTTGCAG
AUBES5344	GCTCCAGCAAGAGACTGTCC	GCTCAGGTCGCTCATACGAT
AUBES5343	GTGCATCTCAGGACAACGAA	CGTTCAAAAGGATTGTGCAG
AUBES5342	ACGGCCGGCTTTAATCTAAT	GACATCGTAGCGCACAACAG
AUBES5339	AAGCCTTTTGTTCTGTTCCA	GAATGCTATTGCCAGCAGGT
AUBES5338	GCCGACACGAGAATTAATGA	ACCCACCCGAGTTTGATTCT
AUBES5336	TCTGGGAAATTGCACAGGAT	AATAGCTGCAGGGGAAAATG
AUBES5334	CCTTTCCTGCACTCCAGACT	TGCAGGCTGAAAGAAACACA
AUBES5333	CCAGACAGTTCTATGGGCTACC	TGATTTGGGGTGGTAGCTTG
AUBES5332	GCGTCCTTGAATGACCAGTT	GTCACGTACGAGGAACGATG
AUBES5331	TCCATGTCATATCGTCCACCT	TCAAGCTCACTCCAACATGC
AUBES5330	TGAGAGCCCAGGTAGTCCAT	AGCTCAGACAAGCCAAGAGC
AUBES5329	GCACCAGACAGATGTCCTCA	GAAATGTCACTGGTGCTGCT
AUBES5328	AGCTTATTTGTAGGTGGTAATAGTAGG	CGAGCATAACTGCTTTGCTACA
AUBES5327	CGACTTTCGGCCAATAAAAC	CAGGTAAGGCCCAGTGAGTT
AUBES5326	CGTTGGTCCGTATTGTGGTA	GCTCACCCAACGTCATTAAA
AUBES5325	CATGTGTGGCACTGCATCTT	AACATTCTCCTCGGCTGTGT
AUBES5324	CCTGCACCGGTACCTTCTTA	CGGCTTGTAGTTTGTTTGATG
AUBES5323	ATTCTTGGAACTCCCCTGGA	TGGACGGATTACACGGTCTT
AUBES5320	CTCAACCCCACTGAACACCT	GCCAGAATGAAAGGAGGAAC
AUBES5319	CCTACCTCAAGGCACAAGGA	TTGCAGCAAAGGACAGACAC
AUBES5317	TGCTTTCTGTACCGGTTTCAC	GTATGAGTTTCGGGCTTGCT
AUBES5316	TCCCTCACAGCAAAAAGACA	CAAGTGTGCAATGCTTTCCT
AUBES5314	CGGAAGTCGGTTTTCCAAAT	AAACTCAGCAAGTTGCATCG
AUBES5311	ATTGAAAGGCAGTGCAGGAG	CGTCAAATAGTACTGAAGCAAAGC
AUBES5310	CACGCCAGCTCTCACTACAG	GTGGACCTGGGAATAACAGC
AUBES5309	GGTTTGCAGTATTCAGGTGTGA	TTGCATTTGACTGCTGATGTC
AUBES5307	GAAGAAAAATCCAAATGGGAAA	CATTTTGTGGCAAAAGTTTCA
AUBES5306	CTGTGAGTGGAAAGTGAAGCA	TATGGGCAGTAGGTGGCACT
AUBES5305	TGACCCTTCAACTGGAGGAC	CCCATGCTGGATTATTTGCT
AUBES5304	CGAGGTTGTAGTCGCTCGTC	GAGTGATGAGCTCCGCCTAT
AUBES5302	TGGAAGTGGCTGAATTTTACA	CCTGGACTGGTATTGGGTTC
AUBES5301	TAGCGGTTAAAGGGGCAAC	TGTCATTTTTCGCAATTTTCA
AUBES5300	CCGGAAGTATTTGGTTGCAG	TGAAACCGTGTGTCTGTGCT
AUBES5297	GCAACCCTGTTATGCAATGA	CAGCAATTTAAGCACTGGGAAT
AUBES5296	CACTCTGTTTGACCTTGTCAGG	GCAATGTGCGCTATGGATT
AUBES5295	GCTGCTTGTGATGAGCTCTG	ACGTTGAGCGAAATCGTCTT
AUBES5294	CTGTGGACGGGAATTTGTTT	CAATGCAAATTAATGCCTTGC
AUBES5291	GACGCCTATTTTCAGGCATT	ACCGTCGTAATCGTCAGGAG
AUBES5290	ACCGATTAATGCCCTTGGAT	GGATATGGCTAACATGGCTGA
AUBES5288	GGCGGTGAAAAAGTATTTGC	ATGCTGGAGCGTAAACAGGT
AUBES5287	GCGACCTGCCGCTTTATTAT	GAAAGCGTGCTAATGCTGCT
AUBES5286	GTCGAAATCCTTCAGGCGTA	CGAATGGTGCTGCAGAGTT
AUBES5285	GCTTTAGGGGTTTCCTCCAA	GGGGACTCAAGGCTCAAAGT
AUBES5284	TTATGGCGTTCTGGGGATTA	GTTGAACCAGTGTGCCGTTT
AUBES5283	CAACTTGGAACACGCAATACA	CCAGTAATCGGAAGCGTTTG
AUBES5281	TAGGCATCCATCCATCCATT	TGGAAACTGTGGCCAAAAA
AUBES5278	TCACAACCCAGCATTACCAA	GCTCGTGTCAACAAATTGGA
AUBES5277	GCTAATCCCTCACAGGCAAG	GATTTCCAGAAAGGCTCCATC
AUBES5275	CCCCCTTCACATTCACCATA	CACATCCGCTGACTCACTGT
AUBES5273	CGTCGAACATGAGGACAGC	CCTTGATTTCGCTGCTGATT
AUBES5271	CAATGTCGTGAAGACCATGC	CACAGTTATGGCGTGAATACAGA
AUBES5268	GCACAACATGCACTTCCAGT	AGCCGGTGGTGTGTGAAT
AUBES5267	GGCGTTACAGTTCCGAGACA	TCGGTCTCCCCCTTACTTCT
AUBES5266	CTCGGCAAGTGACATGGAT	TGTCAAGCTTTACTGAGCATCTG
AUBES5265	GCATTATTTGTGCGAACGTG	CGGTAAAAATGCCAGGTGAT
AUBES5259	AATACGATGGTGATATTCAAACG	CAGAACAGCCTTTCACATCG
AUBES5258	CAGACATAAATGCTTCGAGTGC	TTGCTGGATTTCCTCTTCACT
AUBES5257	TCTTCTGCTATGGTGGAACTGA	TTGTCAGAGGAACCAGCTCA
AUBES5255	GATCCAGTGACCCAGTGAGAG	CCTGTTGCGTATAGCAGTTCA
AUBES5254	AGCCACCCTCCTGTATAGCC	GCGAGAGTGAGAACGAGTGA
AUBES5253	AACTGCGCTACAGGACTCGT	TCGCGAGGAGACAGAAGTG
AUBES5252	TGTCCATTTTCCCCCTCTATT	CCAAATTCCCTCTTTGCGTA
AUBES5251	GTGAGGGTTTGTGTGCGTTA	GCGCGCTACATTTACTTCCT
AUBES5250	GGACACATTTGTGCAATGCT	CAGGGAAATGTGGCACTCTTA
AUBES5248	AAGCCACAGACTGGAAAGCA	TGAGCTCAGGATGGGAGAAT
AUBES5245	TGAGCAAAGAAGGCTGTGAA	GGTAGCTGGCATGGCATT
AUBES5244	TGCGGTAGCACTGTAGATCG	GCAGGTACCGCTGTAACGAG
AUBES5243	AGTTTTCGGTGTATCGCTTG	AGGCATGTGGCTCCAATTA
AUBES5242	ACATGCCAGGTTGGTTTGTC	TGGGAAGTTTTCCTGCATTC
AUBES5241	CAAACCGGAAGTTCTGGAAA	GCACTTCCAGGCAAGACACT
AUBES5240	GCCATTTCCTCCTCATCGT	TTGGTGTGTTTTTGGCTTCA
AUBES5239	ACCAAACAACGATGCTGAAT	TCGGGCAAATATGAAATTGA
AUBES5238	TTGTGATGAGTTGCATGACG	GCAGGTTTTCCCCTTTACCT
AUBES5235	CAAGCACGTGTCCACAAACT	GCTGAAATTGGTGAAACTGACA
AUBES5234	CCCCCATCCTCATACTGATT	CACACTGCTACCATTCATCTCA
AUBES5233	GGGTCGGTTAAAACACAGGTT	AAACAGCCTATAGCATCCTCCA
AUBES5232	GCTTCGGTACAAATGCATGA	GCACAGTAACTGGACAATTGGA
AUBES5231	GACATGTATCTGCCGATTTCAA	TAATGCCTGCATGGTTTTCA
AUBES5230	GGGTGTGGAACCAAATCAGT	ACACACGCAAACGAAACATT
AUBES5229	GGATTTCATCCATTCCAGCA	CTGGGAAAGTTCAAGGGTCA
AUBES5227	GGGGCTGTTTGGTTAGTTTG	CTTTCCCGTGTCATTCCACT
AUBES5225	CAGGGAACTCCCAGCAGTAA	AAAGGTTTGTCCTTCGCTTG
AUBES5224	GGTGAAAGTCAAACACGTACAAA	ACTGGAGGGTTGATCCACAA
AUBES5223	CGATCCTCCAGGGAACTACA	GCTGTTTCCAGTTGGTACATGA
AUBES5222	GGAAAAGCACAATGCTGTGA	GTCACATGGGTGAAAGGTGTT
AUBES5221	GCATCATGCAGAGATTCCAC	AGGCCAGTTATTCATCAGGTT
AUBES5218	TGCAGGAGTTCTTCCAGGAG	CCTTGGGCAAGACACTGAAC
AUBES5215	ATGGGACATGATTGTTTGTTTG	GATGGAAGGAGACCTGGACA
AUBES5213	GCTCTCTGGGTGTCTTCGAG	GGCTTTAGTAAGGAGGTGATGAA
AUBES5211	TCGACAGTTCGAGTGTCCAG	TTGGCTTGTGAGATGCTGTT
AUBES5210	CCATGGGGTGTACTTATTTTTCA	CCTGCAGGACCTTCATGACTA
AUBES5209	CAAATTGCTGCTCATGCTGT	AATGTCCGAGACATCTGTGG
AUBES5207	CCACATCGATTGGTGGTACA	CACTCCAGCTATGGCAAAGG
AUBES5206	GAACCGTCCTCTGCGTATGT	CTGTTTGTGGGAATGCAGATT
AUBES5205	TTCCCTTTTCCAGGTAGTGC	CTCTCAATCAAATCTGCTTCCA
AUBES5203	CAGGGTTTATTGGAGCTCGT	CAGCCAATCAGAAATTCAGAAG
AUBES5202	AGTTTGGAGAGACGGAGCTG	TTCCGATTTTGAGCACACAG
AUBES5200	TCTTTGCCTAAGCCCTTGAC	CTGTGATTTGCCTAGCAACTGT
AUBES5199	CTGCTCACCTGATTGCACAC	TCGTAGCGTTCAGGGAAAAA
AUBES5198	CAGGATGAATATGGCGAGAG	CACCTGTACTCACCTGCCATT
AUBES5197	GAACAGCTATGGGTGGAAGG	CATGGTCAGATGGTGCTGTC
AUBES5193	CTTGTGTCCTTTGGCAAATTC	GCCAGGAAGGGAGAAAAACT
AUBES5192	AAAGGTTTGCTCTCCCATTG	TGCACAAAGACAGACTGACACA
AUBES5191	ATCGGTGGTAGTTTCCAAGC	GTGCCAGTTTGTTGCGTACA
AUBES5188	CACTCGACAAAACCGTGTGT	GTTAGCCTGCGTTTCTTTGG
AUBES5186	TGCCGAGTCCAGAGAAAGTT	GCGACCAGTGCCAATATGT
AUBES5184	CTGTCCTGTGCACTCGTAGG	GATGGGCCATGACTCCTTAC
AUBES5183	CCCATAACGACAACGTGAAA	GCGACAGTCAAAGTCTCCAG
AUBES5179	CGGGACTAAAGGATTGGAAA	AGAGGGAGCTGCAAGAACAC
AUBES5178	GTGTGATTGAGTGCCAGGAA	GCCCAAAGAGAAATGGCATA
AUBES5177	AATTGGGCAAACAGGACAAA	TGGTGTCCTTGCTTTAGGTG
AUBES5176	GTCATGCAGCTGAAGAGGAA	AACCTTCAGGCCATTTCTGA
AUBES5175	GTTATCGCCCTGTTCGTGAC	CGTGTCAGGACCTCATCAAC
AUBES5174	CCCGTGACTTCCTTTAATGC	TGCTCGAGTCTGCAGTCAGTA
AUBES5169	TGGACGAGTCATGAATTAGGC	CAGACAGTGTCCTTCTGCTTG
AUBES5168	GGGTTGCCAGATCAGAACAG	TGTGTTGGTCCATGATCGTT
AUBES5166	ACCTCCATCCCAAAACACCT	GCTTTATATGGCCATGTGATCTT
AUBES5165	CCTACAATTGTTGATGTGGTGAA	GTCTCTACCCACCCAATCCA
AUBES5160	TGGAGTGGGTGTTTGTCTTG	CATGGGAAGTCAGGTGAGGT
AUBES5159	ATGCATGCGTGTTTGTATGC	GATCTCTTCACGAGGCATGAG
AUBES5156	CACAGGAATCACAACGTGGA	TCTCTGGACATGGTGTGGAA
AUBES5155	CTGCCTTAGAGCTGGATGGA	AATGGCCAGTCCGTGTAAAG
AUBES5154	ACTAAACACTGGGCCCCTTT	TGAATGCAGGAGCACAATTT
AUBES5151	CATGAACCTCCACTGACGTG	CCTATGGGTCAAAGGTCAGC
AUBES5150	AGTCCAGTAGGTGGCGGTAA	GGAAAGCTGCGTCATTCCTA
AUBES5149	TTTGTGCAAAATGAAACTTGCT	CTGAGATCTGGGGAATTTGG
AUBES5148	TCCTAGTGCCAGGCTCCTAA	GTGGTCAATCACCCACCTG
AUBES5146	GCACGCTTTTAGTCTGCAAAT	TGAACTCGCACCACACATCT
AUBES5145	TCATGGATGCAAAGGCAATA	GCAGCGTCACTTAAGCTCGT
AUBES5144	GCAGGCTTGTGAGGTTAGTGT	CAGGATTAACCATGATACCAGGA
AUBES5141	CAGGCTCCCTGCAATAAGTG	GCATCCATCCATCCAATCAT
AUBES5136	GGTACTGGGTTCACTGGCTTT	TTACGCAGCCAATACTTACCC
AUBES5135	GAGTGCCTTCAGGTTGCCTA	AACATTTCCCACTGGAGCAC
AUBES5134	CGACTCACGCACCCTAAGA	GACCCACTATCTGCAGGGATAC
AUBES5130	TAAACCGTTGTTCCCTCACC	CATGGATCCTCCTGCCTCTA
AUBES5129	ACATGCGGATGTGCAAGTAA	GGCATCTCTGCTGGATACCT
AUBES5124	GTTTGTGGTGCCATGTCAGA	TGAGGATGACTTTGAGCCTTT
AUBES5120	GCAGGATGAGGCTCAGTGTT	GACATTGTGGGTGTACTTATATACCTT
AUBES5119	GCTGTTAACGTTAGAATTTGATTTT	TCATCTTCGTGTGCTGCTTC
AUBES5118	TGGACTTTGGAAATGAAGAGAAA	CACCGATTTTGAAGGTTTGAG
AUBES5117	AAAGAAGGTTGCTCCTGCAC	GTAATGTGTGGCGCGTATGT
AUBES5116	TGCACTTTGCACATATCAGG	CACCAACCCATCATGGAATA
AUBES5115	CTGAGTTTGCTGGATTTTGG	TGTGAATGGACCTTCTTGGA
AUBES5114	TTGAAGCTTGAAATTAGTCAAAAGAA	GCATGTTTCCAGGGAGAAAAA
AUBES5091	GAACTCACGCTGCTCCACTT	CGTCCGTTCACGTAAAGCTC
AUBES5090	CGTAGCGAAAGTGGTCACATC	TGGAAACTGAGGGTGCTTGT
AUBES5089	GCGAGAGAGTGTGTGCATGT	AGCTGGTGAATCGTGTGTTG
AUBES5088	GGCATTTCATTGAGGCAAA	CAGTGGTGCTTTTGGAGTGA
AUBES5087	TTTCTTGCCACTGTCACCAC	CCTGACCATCACACCCTTATG
AUBES5086	TAACAGCAGCTTTGACAGCA	CCAACAAAAGTCGACCAAAGT
AUBES5085	TGGCACCCTTGGTAAGTATG	CACCACATTTCAGGTGGAACT
AUBES5084	CAGCTCTGACAACAGCATGAG	TCAGGTGTATTTGCCCTTGAT
AUBES5083	CACTGTTCACCCACAGCAAC	GCAAACTGGATGTCTTTGAGAA
AUBES5082	CTGGCTAAAATGCATGGTGA	AGCAGGTCTGATTCGCAACT
AUBES5080	CAATAATGCGATGGATGGAT	CGCAGACGTTCTGTGACATT
AUBES5078	ACCGTGCAACAATACAATGC	TGTATGATCTGCGTGCTGTG
AUBES5076	TTTGAAATGCAGCTGGTTAAA	CCAAAGAAGCCGTGATGTTT
AUBES5069	AAAGGCATTAGAGCCTGGAT	GCCGAAAAGCGACTAGTTTG
AUBES5067	CGCAGAATAAAATGCGCTCT	ACTTCTAGGAACGCGCACAC
AUBES5065	CGGAAATCCATTGTTTTCTTTC	GGAGCTCCAGATTGAATGATG
AUBES5063	GTCAAGCCAGGCCACATTAC	GCAAACTGTCAGCCAGTCAT
AUBES5061	TTCAGGGCACAGCTTAATTG	CAACCCATGGATATGCTCCT
AUBES5060	CACGTTGGCCTTATGACCTT	GCTGCGATATTTAAAGGTGTTTCT
AUBES5058	GCCCAATATGTTTCGACCAA	CGAGCTCTCTTCTGAGTCGTC
AUBES5057	CTCCAAATGCACATTGCTGA	CAGTTATTAATTAGTTTGGCGTGTG
AUBES5056	CAAGAACCAGTTGGGTGTCA	CACGTTTACACTGTGGCTGAA
AUBES5055	GCGTCTCGTGGAGTTCACTT	GCGAGACTGCCGATACAAAC
AUBES5054	TCGCGGTCCTCTCTTATTCT	ATCCCTCCAGACTCGCACTA
AUBES5053	TGGCACGCTTGATGCTATAA	AAGGACGGGCTGAGATGAAT
AUBES5052	GCCCCAGGGTGATACAGTAA	GCACGGACAGCACCATCTA
AUBES5050	GCCAGCAAAAATGGATCTACA	CCAGAGATCGCACTTCCATTA
AUBES5048	ATCACCACCGTCTGACCAAT	CCTGTTGAGGAGAGCCAATG
AUBES5047	AACGTGCACTTTTGGTGTATTT	GGTCACGAGTAGCAGGGTTG
AUBES5046	CAGAACTCAACAGCAGTGTGG	GATCGTCCAATTCAGCATCA
AUBES5044	TGGCACGAGTGTGGTTTCTA	TGCCAGAATGAACACTTCAACT
AUBES5041	TGGGCACTTTAGGAAGATAAGG	CCAGTGGCCACAGAGGTAAT
AUBES5040	CTGCGCTTTCATCTTCTCTG	ACGTTTCAGTCGAGTGTCCA
AUBES5039	TATGCTTGCCTGCATCTTTG	GCACAACATGTCTTTCTTGGA
AUBES5038	TAACCAGGGTCAGAGCAAGG	TCGTCTCAGCTGCAAAAACT
AUBES5037	CACACAATTTTGCCCTGTGT	CTGGGAGTGGACAGAACTGG
AUBES5036	GGCGCAGTCACAAAGATGTA	GCGAGATGCTGATGGTACTG
AUBES5035	CACGGCAGACACTCAAAGAG	GCGGTTTACCTCGGCTTTA
AUBES5034	CTGCCACATGGTCTGTCTTC	CTCAGTGAGTCCCTCGCTTT
AUBES5033	CGACGTGTTTCCTGTTTAATGA	GGAGGACGTTAGCGTGAAAA
AUBES5031	CAGCTACTGGAGGGTTGCAC	GGCTTGGTGTACTTCAGTGGA
AUBES5030	TCCATACAGCTGGCATGTTC	CGGATGTAAACAGCAGTGGA
AUBES5025	CCAGCAGATTCTGGGAGATT	TGCCACTGGAAATTATGGAA
AUBES5024	CATGCAAGACCTGTGGTGAG	GGCACGTGATGCATTTTTCT
AUBES5022	GAGTGCATTACTTTGAACCTTGC	CACAAACTGCCAGCAATACAG
AUBES5021	CATGTCGGATGAGCTTCCTT	GCAACCTAGCCTTGAGATGA
AUBES5019	TGTCCAAAACTTCACCAGCA	TTCTCTGTGCAACCCTCAGA
AUBES5018	TTCGGCATATCTTTTCACCA	GCAAAGTTGTAAACTGAACAAACC
AUBES5016	TTTGTCAGTGGGCAAACGTA	TGTTTCACGGACATTTCCAA
AUBES5015	CGATAGGAGCTTGCTGTTGA	CTCCACCTCCCGAAAACAT
AUBES5013	TCTTGCATGTGTTTGGGTTT	GCAGGACAGTGCAAAACAAC
AUBES5012	TCTGCAAAAATTGCTTGTGA	GTGAGTGGAGCGAAGGTCTC
AUBES5011	ACTCATTTCCGTCTGGCTTG	TGATGCCGCAGTCACAAC
AUBES5010	CACCATGGAGTTTCTTGGAGA	TTGGAGTGTGTTGCTCAAGG
AUBES5009	TGCTTGAGTGGGCACTATGA	CCGCACCAAACTAACAAACC
AUBES5008	GGAAAATCCTCCGCTTATTCA	CAAATCCGACCATGACACTG
AUBES5007	CTGGGAATTGTGATGTTCCA	TGTGAGGCGTTTCATTTTGA
AUBES5006	TCCACAGCATTGAGGTGTGT	AGGGTTCAGCAGCAGTTCAT
AUBES5004	CAGTCCATGCACGTTACGAA	ACCAGGTGGCAACAAATACA
AUBES5003	CGAGCGAGGGATGTACTTGT	CAGCACGTCCCGAAGTTTAT
AUBES5001	TCCTCACGCTTGCCTATTTT	CCAGTTTTCAAACAGTCAGTCC
AUBES5000	GATCAGCTGGTGGAACGAAC	GCGAAGAGGTCCTGAGTTTG
AUBES4997	GGTTGAGGGCTGTTTCCTG	ACCGCTGAGAGGAGTGAGAG
AUBES4995	CCCTGATGGAAGGATCTGTT	TGTGAGCATTGTGACCCATT
AUBES4993	CATCTGTGCAGTCTGATGGAA	CCGTACGCTACATCCACCTT
AUBES4992	GGCAACAATGTTTGATTTGC	CCAGGCAAGACTGGAGTAGC
AUBES4991	TGTGGCATGATTAACGTTCTG	CCCTATGTCACTGTGCAACC
AUBES4990	GGACCGTTTCTCTTGAGTTGA	GAATCGGCTTTACCATTCCA
AUBES4986	AATCGGTCAGATGTGGAGGA	TGCCTGTCTGTATCTGTCTGTG
AUBES4984	GCCTGGCCTTCTTAATTTCG	GGGAACTTTCCCTCACTGCT
AUBES4983	CCGGTTCCTTCAGTTCTTTTC	GCCCGTTTCAAGTTTCTTCA
AUBES4982	CGCATCAACTTTCAGGACAA	GCACACTTCTGGTTGCATTT
AUBES4976	GTCGTTCGTGCACTTGTCTG	TCAGTCGCAGTCTGTCATCC
AUBES4974	AACGGAGTTGCATTATGCTG	GATGTGCACCCTTATCGTCA
AUBES4973	GCTTAACTGTCAGTGGCATTC	CCTTTGGTTCTGGTAAGGTTG
AUBES4972	TCTGTTAATGTCTCCAAGACCAAA	CACAATGTGAGGCATCATTTACA
AUBES4971	TTTAGGGAAGGCCCACCTAT	GTGCTGGATCACTTCCTGGT
AUBES4970	GCATCTGACCGAACAACAAC	TATAGGAATGCCCACCTGGA
AUBES4969	AATGGGGCTGTTATTCCAGA	TGCTCTTTGGGAATCCTCAC
AUBES4966	CAAACAGGAGCAATGGAAGG	TACTCATGGCCACACAGCAC
AUBES4965	GTGTTCAAACCCCTGCTCAT	ATTGTGTCCTGCTGCTCAAT
AUBES4963	CCGGTCTAAAATATTTAATGGTGA	GGCTGTTTTAAGGAAAAATTCAGA
AUBES4956	GATGGACTGGCACCCTGT	GGCCACTCCACATAAACCAA
AUBES4954	CCCTGCTATTCCGCAGTCTA	ATGTTTCGATTAATGAGATGAGG
AUBES4951	CGTCCATCTTTCCAGTGTTC	CGTCAGTCACGAAGATCGAC
AUBES4950	TGACATTTATTCCCCCACTGA	TTCCAAACAACCAAGAGGAAA
AUBES4949	TCGCAATGGCGCATATATTA	TCAGCGTCTGGTGGAAGTAA
AUBES4948	CATATCCCAGCCCTCAGTGT	CACTCCACTTCTGCAGCCTA
AUBES4947	TTCACTGCAGACATCGCTCT	ATGATCTGTCAGCCGTCCTC
AUBES4946	CGGTGGTTAAAGGTGACGAT	AAGGGAGCAGTTTTGTGGATT
AUBES4944	GCATGCTTCTGTCATCTAGCA	GGTGTTGGATAACCTTTCTTGC
AUBES4943	GATGAAGCAATGCTGCTTGT	GTCCTGGCCTGGTACAACAT
AUBES4942	CGGATTGCACAATTCATCAG	GCGCTTGTAATCCAGACGA
AUBES4939	CAAGAGTCAACCAAATGAATGAA	GGATCTGCCCAGACATCATC
AUBES4938	TTGACGTGTCCAAAGTGTCC	TGGCTGTGTCTATGGTGTCAA
AUBES4936	CAGACGTTTGGACCCCACTA	CGCGCTACATCACCAAGATT
AUBES4934	CCCGTTTGCAAGATGTCTTTA	GCCCTAACAATTTGGTCTGC
AUBES4933	TGTAAATGAGCAACGCTGGTA	AGCCCAATATGCTGCTTTGT
AUBES4931	CCACTGCCCTCACTAGCAG	TGAGGTTCACGTGCTGATTC
AUBES4930	ATGGCGTAACACTCTGAACTCAT	CTTGCATCCTTTGCAGTCAA
AUBES4929	GACCCGTACTGAATTGAATGG	AGAAATGGAGCGAGCACTGT
AUBES4928	TGCCAAAGGTATGCTCCCTA	CACCAGTAAATGCACCCAAT
AUBES4926	CCTGCTGCCTTAACCAATGT	ACAGGCGGAGAACGTACAAC
AUBES4924	GGACAATTAAACGCAAAATGC	GTTCCGATACGTGCAGCAG
AUBES4923	CAGTGGAGGGCTACAGGAAA	TTGATCGATACTCCACCATCC
AUBES4921	ACGTGGCTAGCAACTCGTTT	TGCCGTTTATTTGTGTACGG
AUBES4919	GGAAGCTTTTGGTTGCAGTT	CAGCATTCGGTTATCGGTACT
AUBES4918	TCAATCACTCTCTTGATCCTTTCA	GCCAATGTAAAGTTGGCATGT
AUBES4917	CACTACGAGGGCAGGGACT	GACGAACAGCATTGTGGGTA
AUBES4914	CCATGTTGAATATCCACCAAGTTA	ATGCAGTGCTCGCTATGCTA
AUBES4913	TATGTGACTGCCGGTGGTAG	CTGTTCCCCTTTGCAGAAAC
AUBES4912	GGGGTTGTACTTTGTTTTGACC	CCCTTGTTTCTCTTGATTGGA
AUBES4910	CATGGACAGTGCACAAAACC	AGCCACAACTCGTTCCAAAT
AUBES4909	CCCCAAAGCCATAGGACTAC	GGCAATTGATTTGCTGCATT
AUBES4907	ACAGCTTTCATGGGCTGAAT	TGTGTTCACACCCATTTCTGA
AUBES4906	ATCATGGCCATTCCAAAAGA	CGAATGAATTGTCCTTGCTG
AUBES4905	GACAAACACTTCCTGCTATCAGTT	TAAAATTCGGCCTTGGGTCT
AUBES4904	CTCATCCGCGCAGAAATTA	GCACACATATTCAAAGCGTGA
AUBES4901	GGGGAGGAAACTGGAGTACC	TCTGTAGTGGGTTTTCAGCAA
AUBES4900	TAGCGTTCGTTTATGCGATG	TGATCGAGACATAAGGGGTGA
AUBES4897	GCATGACTGTGCTGGCTAGA	CAGGTGGTTAGTGGCAGGTT
AUBES4896	CGGTTGCAACACACTCAAAG	CCAGCCCACTAGACAAGCAT
AUBES4894	CTGGATAAGTTGTGTCCCTTGA	CACTTTTTCCGAAATCACAGC
AUBES4891	ACCCTGCACTGCTCTCTGTC	TGCAGGCGGATTGTCTTAG
AUBES4890	GTACCCCAGGTGTGTTTGCT	CTCAGGAGTTTTCCTCCACTG
AUBES4888	GAGAGGGACATCCGGTCTCT	GCGCATAGATTTCCAGTTGC
AUBES4887	TTGAGTGCGAGTGTGAATGAG	CCGTGGGGATTTACAGATCA
AUBES4885	AGTGGGTGGTGCAAAAGTTC	TTTGGTGGAAGAGTTTGTGG
AUBES4884	CCCATGCACATCAGAACAAC	GACCGAGCATGAGTGCTTGT
AUBES4883	GCAGGGTGATCACAGATGAA	TTGAAAATCTGTGTAGGCATGG
AUBES4881	GAGCGTGGAACCTACCTTGT	CTGCGTCAGGACACCGATA
AUBES4877	GTTTGTGAGGGTCCTCATGC	AAAATCCCACACGTCAGGAG
AUBES4876	TCTGGCCCTTTGACATCTTC	TACCCGCATTCTCATGTCTG
AUBES4875	CGTAAGATAACCAGTGAATGTGATG	AGCTCCTTCCTTGTGTGTCC
AUBES4872	GCCCAGATTAATTCACATCACA	TTGGAACTCCGCAAATTAGG
AUBES4871	AGAATGCATGTCCACACACC	TCGTTGCCATTGTATTCACAG
AUBES4869	GGTGGATTCATTGGGTTTGA	GGGGACAGCAAATTTACACTG
AUBES4868	GTTCATCTGCCGCGACTATT	CCCCTCAGAGAAAGAGAGAGC
AUBES4866	CATCGCTGCCTATGGTGTC	TGCATTACGTTTCCAAACCA
AUBES4865	ATCCTTCTGCAGCTCGACTC	GAGTACCGGCTTCTGAGTGC
AUBES4864	TCAGCGTCAAGAGACCAACA	CATAGTGGCGCAATCAACAC
AUBES4863	TATTGAAACACGGTGCAGGA	GATTCAGACTCCGGACCAAG
AUBES4861	GGGACTCCCATCAGAAACAA	TGCCTGTTGTTCAATCTCAA
AUBES4860	CTTGTTGTGAGTGGGTGTGC	TGCATTACCCTGTGTTTATGTT
AUBES4859	CAGCACGCAGAATCCTGTTA	GTGCGATCAGTCGAGGATTAC
AUBES4858	CTGTCGATGATGTCCTCGTG	GCTGCAGTCCCTCACTACATC
AUBES4857	TCTCCCGCTATATGGTAGGC	GCATCAGCCCTGAGAACACT
AUBES4856	CGTGTTAGGCTTTCTGAATGG	TGGATCTCATGACAGTTGGAG
AUBES4854	CACACACACACACCCAAACA	CCTGCAGGTCTCTGTCACTC
AUBES4853	CCCACAAAAACACACACACAC	AATCTGTCCGTCTGTGATCG
AUBES4851	AATCATTGAGCTGGCAAAGC	TGTCTGCACTGTTTTTCATGC
AUBES4850	CACAAAAGGGCAGACAACAG	TTAGTTCCTGGTGGCAAACT
AUBES4848	GTTGGCATTGTACACGTTCG	CTTCGACGGTGAGGACTTTC
AUBES4845	GAGAGACCGAGAGACCGAGA	AGTTCTGCATGCACACATTTC
AUBES4844	GACTCATTGTGGCCCAACTC	AGTAATGCAGGCCAATCAGC
AUBES4843	ACATAGCCTGCCTCTTCACC	TCCAAAAATGCCTTTTGTCTG
AUBES4842	GTCAGACGGTGTCGGTTAGC	CGTCTCCTTACAGAAAACTTCACC
AUBES4840	GGCGAGGATTAATCGTGATG	ATCTTTTGAGGCCAAACAGC
AUBES4839	AGGCTAAATTCGAGCCAACA	ACAGGAACAATGCACCATCC
AUBES4838	ATTCGAGCCAACAAGACCTG	GGTCAGCGGACAAACAAGT
AUBES4837	CACATGCAAACACACACTGG	CCCTGCTCTCAGGAATTCAG
AUBES4836	ACCTGGGTATGAACCACGAC	ATATTTGACGGCTGCTTGAG
AUBES4835	ACTGCAAATTGCTGCGGTAT	ATTTGGGTGGTGCTTCATTC
AUBES4830	AGATTTTCTCATGGGGAGCA	CATTCCTGCAATCTGCCAGT
AUBES4829	CAATCGTTGCATTTATGTAGCA	CAATGGAGAAAGGGTTGGTG
AUBES4828	AATAAGGCGTCTTTTTGTTTCG	CCACGTGTGACTGGCATCTA
AUBES4827	GCTGAACTGATCGTTGTTTTTG	TCAAAATGCCATGTCTGACC
AUBES4826	ACACAGAGCAGGGACGTTTC	TTCTCTACCGCCCAGCTTAC
AUBES4825	TGACTTAAATCAACATCATGTGC	GTGGCCACCAAATTATCAGG
AUBES4824	TTTCTCATTGCAGTGGATGC	CATTTTCAATGTGGTCTCAGACAT
AUBES4823	TGTATTGCTCCAACCTGGAA	TCCACCCATGTTTATGAATGA
AUBES4820	TCAAACGAACACAAGGATGC	TATGGCTCCTGATGTGTGGA
AUBES4818	GTCCAGGGCTCGATTATGTC	AGGAGAAAACGTATCTGCCAAT
AUBES4815	ACCAAAAGGCCAGGCTAATC	CCACGATGTCGTCCTCTAGC
AUBES4813	TGCCCCCAATGTCTGAATAC	TCTCGTCTTCCTGGTGCTCT
AUBES4811	GTTGGATGAGGGTCAGCTTC	GGATCAAGCTGTGGAGCACT
AUBES4808	CTGTGTGCCTGATTGTCTGC	TGTGGCATAGAGTGCTGCAT
AUBES4807	CCCATTTTGCTGTAGCAGGT	AGTTCCAGTTTGTGAAAATGTGT
AUBES4806	GTGTCCCCTGTTACCTGTGC	GGGTAGTGGCAGGATCAATG
AUBES4805	GGTCAGTCCCTCATCGACAC	TACCCTCACACCACAAACCA
AUBES4804	GCGGACATGGACACTGATG	GTGCGCGTGTATACGTGTGT
AUBES4803	CAAAGAGCAAACCCCAGTGT	ACGCACATGTAGCTCCCATC
AUBES4802	GCGAGAGGGAATAAATGCAG	GTTTGAGCAAAGCCTGATGG
AUBES4800	AAGGAGTCTTGAGTGTCAGTGC	TGATAGGGCCTGATGGAAAG
AUBES4799	CAGTACTCGTCGTTGGCATC	CGGGTGGAGAGAGATTGTGT
AUBES4797	TCTTGCCTGCCCTTGTTTAC	CGTACGTTGTTTTCTCCAAGG
AUBES4794	TTCGAGAGAAAGGTTTGCTGA	CAGGGACCGTAACTGGTTTG
AUBES4793	TCCCACCACCATAGAGCAAT	CATCAGCACGAACGCATTA
AUBES4791	TGCCATGTTTTCTCTGCTTG	TGTATGCAAACTGCATTCGTC
AUBES4789	CGAACACACTTGATCGGCTA	TCCCTTTGGTGAACAGGAGT
AUBES4788	CGGCGTCGCTTCATATTCTA	GAGAGAAGGCCAGAGGTGAG
AUBES4787	AATGCTGGGATGATTGGATG	GCATTCACAAACGCCTAACA
AUBES4784	TCATGAAAAGGCAGGTGTTG	GAGGTAGCATTCATGCACAA
AUBES4783	GTGAGCGTTATTCCAGACAGC	ACTTCCGGGAGGTAGAGTCC
AUBES4782	TTGGACAAAAGTCCTTCATCG	TGTCATGATCTCTGACCACCA
AUBES4781	TGGCTGTTTGATGGATTCTG	TGTGTGTGCATGCTCTGTGT
AUBES4779	CAGCCTGTTTGCCAGTAGAA	CACGACCCAAAAACAGGAAC
AUBES4778	GGTGCCATTCCTTCCATTAC	TGGAAGTGCTTTGGGTTAGG
AUBES4776	TTGGCTCACAAAGCCAAAAT	GTGCCTACGCACCTTTGGT
AUBES4775	GTTGCGCTGATACTCGTTTG	TCGGTGGTTAAAAAGAGAACG
AUBES4774	TGAGAGAGACGGAGGGAGAA	AGATGGAGCTGCCAGAACAC
AUBES4769	TGTGGATTATGGGATGGATG	CCCATTCAAACAGACTTAGGTG
AUBES4767	TGGAAGACCTGATTATTCTGTACG	AACGGAAAGGAGCGATTTTAG
AUBES4764	GAAGGAGTCTCCGGTGTCAG	CGGTCATTCTTTCACCAACC
AUBES4763	CCTCAACAATTCGGTGTGC	TCCCCCTTCTGCAAGATGT
AUBES4762	ACAGCATCCGAATGTTCACC	TGTGAATCCAGGGAGACTGA
AUBES4761	TCACTCAGGCTTGACTGTCCT	TCCGGTCATGTGTTTTATCG
AUBES4759	GGACGTTTTTCAGTGCTGGT	CACCCTTGAGTGGCTTATCG
AUBES4758	TGTTTGATGGACGTTGATGG	CACATGGGTATGCCAATCAC
AUBES4756	GGGCTTCACATCTGACCAAT	GAAAGAATGGAAGGGTGTGG
AUBES4754	TAAACGGTTCGCCAATGACT	CTGGGAGTGAGGTTCGAAAG
AUBES4753	GGATTTTGCCTTGCCCTTAT	ATTAGTGATGCCTGCGAAGC
AUBES4750	GAAAGCAAACAAAGGAAAAGG	GAGCCTCTCGTCTGAGCACT
AUBES4749	AGCAAACAGTCCATCGCATA	GGTGTCCCCATACCTCTGAC
AUBES4748	CGGAAGGAGTCTCCAGTTACG	CAATCGACTTCAGGATGGTG
AUBES4747	CATGTGGAGCACCCATAGTG	ACCACTGTCACACCGTCAGT
AUBES4746	AGAAACCGTTGAAGCTGGAG	TCAACTGTCACCTGGTCCTG
AUBES4744	AGCTGCAAGCCAAAGACTGT	GGCAGTGCGGAGTCTGATA
AUBES4743	ATGACCCTGACCAGGAAATG	TCATAGCCCTAGCACAAGCA
AUBES4742	CATTGCTCCAAAACCACAGA	GGGCATCAATCACTTCAACA
AUBES4741	TTCCCTGGAGGAATGAAGAG	TCACCAACCACCTTCTGTTG
AUBES4740	TAGGGGTTCAAGCAAAATGG	TTCTTCCTCGAATCCCTGTTT
AUBES4739	AAACGTTTCCTGTTCAACGTC	GGACTAGTTATGGGGCAGCA
AUBES4738	TTCCCCCATTTGTCCTTTCT	AGCACACGGCAGGAAAATAC
AUBES4736	CCGGCGATTAATTTGAACAT	ACCGGTGTTTAAAAGCCTCA
AUBES4735	CCCGAAACTGAAGCTGATTG	TGTCTTTTCCTGCTGCTCAA
AUBES4729	TTTTTCCACCAATATGACATGA	TAAGTGGGTGGGAAATGACA
AUBES4728	GCCTTGGTCCTTTCATCTCA	CACCTCTTCTGCAACCACAG
AUBES4726	TTGTAGGTGCACGGATGAAG	TTGTGCTTTCGCGATAAAAG
AUBES4724	GCATTAAGCTTTCAGCTGTGG	TTCACGCAAACATACATTCG
AUBES4723	TGCTTAGGCAACTGCTTTCA	ACCATGCACACACACAGAGG
AUBES4720	ACACATGGGGACATTTGGTT	TTCCTCCTTTGCGCAATAAC
AUBES4719	GCCAAAACAGCAATAAGGTGA	TCTGAGGTTGAGGAACTGTAGGA
AUBES4718	CAGAGTCTGTGAGCGGTCTG	CCAAAAAGTTTGAACTGAATCG
AUBES4714	GAAGGCAGATCCCATCTCTG	TAGACAAGAATGCCCGAGGA
AUBES4713	CCAGAGACCCCTGCTAATGA	AGGGAGCTTGAGTGTCATCG
AUBES4711	GCGCCACATGATGAGAATTA	ATTACGGGCCTTGCTTATCA
AUBES4709	CTCCCAAAATTCCCTTAGCC	TTTTAAGCTTCCGGTTTAAGTG
AUBES4708	ACAAGGCTCCGAAAGACAGA	ACAGTGAGTGGGCTTTACGG
AUBES4707	TTATTTTTGCCAGGGGTTGT	TTCTCACCACTTGGGGTCTG
AUBES4705	CGTTTGCCAACAAACATCAC	TCTCCAAAATTTGCAATCCA
AUBES4704	TGCCGGTAGGTGCCTAAAAT	CGGTTAAGGCACATTGGACT
AUBES4702	TGTGATTGAACCCTTCAGACC	CTCAGTGGCTTGCTCAGTTG
AUBES4700	CCTCATTTTCCCTCATGTCG	TGTGGCTGAATTCTGCTGAT
AUBES4699	TTTAGTGGCTGGGAGGTTTG	CTCATTCACAGTGTTGCACGTA
AUBES4698	ACCACTGGGTGCTTTCTGTC	TCCAGAAGCGTGTCACTGTC
AUBES4697	CATGGCCGAAATTTGTATTTG	CACCGTGGCATTCATTACAG
AUBES4696	TCTCGACTTTCTCTGCCTGTC	TTCCATCATCCTGCACTCTG
AUBES4695	TCGCTCTGTCTTTTGGGAAT	TTTCAAACCGACCGACAATA
AUBES4694	ATGCGCACACCCTCATACTC	CGGGGGAAATGTTAAAATCA
AUBES4691	TGGGGGAATAAATGTGTTTTG	GGCTTCGTGCATCATTAACC
AUBES4690	AAATCACGCTGGAGGGTTC	ACCAGCCACAACTCAGATCC
AUBES4689	TTTTGACAAAGCATGGCAAG	TGACAGAGAATCAATGGACTCATAC
AUBES4688	TCAGCAGGTTCTCCCATTTC	GGCTGCTGGGAACTGTAGTC
AUBES4686	TTCTTGGGAAGAGCTGGAGA	TGAAGAGTCCCCAAAACAGG
AUBES4685	TGAATCACATGTAAATGAATCATACG	GCAATTTCCAAACAACAGAAGG
AUBES4683	CAGGATAGCATCAGGACGTTG	GGTACAAGCGCGCTAAATTC
AUBES4682	AGCCGGCTAGAATGTTGCT	TTGCATTCAGCTTTCCACAG
AUBES4681	TCCGAATGTTATGGCAGGA	GGTCAGGAAGAAAACGATGC
AUBES4679	AAATCACAGGCTACCGCAAC	CTCAGCATCCACCTGCAAT
AUBES4677	TTTGGTGAACGGTGTGACTC	TTCCAGTGTGTGGTTTTCCA
AUBES4676	TCCACATGAGCGCATTTAAG	AAGCAACAGAAAGCCATTAAGAG
AUBES4674	CATCATATATTGGTTTGTTTAAATTGG	TGGTGCTAATACGATGATACAAGG
AUBES4672	ATTGCCGAAGCCTAATTTCC	TGTATTTGTCCGCCCTTAAA
AUBES4670	TCCAGCTAGCGATGTTAGGTT	GGGTGACGTGTTTTTGTTTG
AUBES4668	TTAAGATGTGGCAACGGATG	AAGCACATAATCTCAGTTCACACC
AUBES4667	CCATGGCTGCCAAATGTATAG	GTGACCTGGGGAAATGTTCA
AUBES4666	TGCAATCGAGCCAGTTACTC	GGTGTGAGGCAAGTGTGCTA
AUBES4665	ACATGGACAGCTGCTGAGTCT	GAACAAAACAAAAACGCCATT
AUBES4664	AGAGGGCTCAGTGTTGTTGC	CCTCACTCACCTCCACACCT
AUBES4663	TGGAATCCAAGACTTTGTGG	TCTGAATCTGGCAAAAGTGC
AUBES4662	TCTTCTTCCAGAGGTCTTCCAG	TGAGAAGAATCTGCTGCATCC
AUBES4661	TGAATCTGTCCTTTGCACCA	TTCAGACCCAGAAGATGAGGA
AUBES4660	CCTGAAGATCATGGGGAGAC	CGAGCGCTTTCTAACAGTCA
AUBES4659	CGACAGAGCTGGAGGGTAAG	TGTGTCCCATAGCAGGTCAG
AUBES4658	GCCTAGTGGCACTCACATTG	CTCCTCCCAAATGCTGAAAC
AUBES4657	CATGCTGGCACAAGAGAGAG	TGGGAATGAAAGAAATTGCAC
AUBES4656	GGATGGCAGAGAAGGAATGA	TTTCAGAATTGGGGTTGTACG
AUBES4655	AAGCCTCCATGGGCTAGTAGT	TGGGAATGAAAGAAATTGCAC
AUBES4654	GGGGCTAAACTCGGCTTATT	TGAACTCTTATGATGGGAAAACTT
AUBES4650	GCCTGTCTGTTGGTCTTGGT	AGACAGGCAGAAAACATACAAGAA
AUBES4646	AGGGTGTGTTGGCTTTCTTG	CAAACAACTGTTGCCTCGAC
AUBES4644	ACCTGCTGCTGTCTGTGTCA	TCTGCTGGACTGGAGAATCC
AUBES4643	CTGGCACGTGTCCAATCTT	TGGAAGTGTGAGCATGATGG
AUBES4642	AATAAGGCAGCCAACAGTCG	AAAACAGGAAGTAGAGTGATTTTCA
AUBES4641	CCTCCCATAGCGTGGATCT	CTTGGGAAGCTGCATCAAAT
AUBES4639	GCAGAGCGATATCAAGCAGA	ACGAAAGACCCACCTCTTCA
AUBES4638	GCTTGGACCCCTAACAACAA	GTGTTTGTGGCTGTTCCAGA
AUBES4637	AACAGGAGGTTCCGAAATATCA	GACGGGGGATCAATAACAGA
AUBES4636	GCAGTGGTTGCTGGTCTTTT	TGTCCATCTTGGTGATCTGC
AUBES4634	GCACTCTAACTAACCAACCCACA	ACCACCTGCACAATGTCATC
AUBES4633	CACGTTTCGAAAATAATATCAGGA	GTTTTGCTCCTCCTTCCAAA
AUBES4632	GGTTTTAACGCACACCTTCC	AAGCTGGCTGCACGGTATTA
AUBES4630	CTACCAGGTTGGGCAGACTC	TGTTTCAGTTCGCTGCACTT
AUBES4629	AGGGGGAAGCGACATGATTA	ATGTTTGCCGATTACAAATGG
AUBES4628	CCTGGAAAAGTTTGGGAACC	TCTGCGTGCTTTTGTTTTGT
AUBES4627	CAGCAAGCAACCATCAAACA	TGCATCACACGTTGACACAT
AUBES4624	CCCGTTTTCTTTTTATGCTTGT	ACACTGATCCCCAAGTTGCT
AUBES4623	TTTTACCCTGGGAACGAATTT	CATTCTGTGCAGCGTTCACT
AUBES4622	CCGTCCTGGTATGAATCTCC	CACACAAAATCTCGGCACAC
AUBES4621	TGTTATGTGCCTTCCAGCAG	GAATGTGCAAATGCAAGCAC
AUBES4620	CCTGTCAAATCGGAGACGTT	CGACAGGGGCTTTGAATATCT
AUBES4619	TCTGGTGCAGTAAGCTGTGG	CCTCGCTCATTCAGAAATCC
AUBES4618	CGTCGCTTCAGTGGATTCTG	TTATTTTTCATTTTGTATGTATTCTGC
AUBES4616	GAAATTGCCGGGAAAGTGTA	TGTCTATTATGGCATTTTCTCCAA
AUBES4615	TGCAATTTCAGGACAAACCA	ACATTCATGGACACATATCATGG
AUBES4612	AGACGGTGGACGTAATCGAG	CATGCACGGCCACATACTT
AUBES4610	CGTCTCTCACCCATCAGCTC	ACATCATCGATTCGCTGTAGA
AUBES4608	CATCGCGTTCTGATCTCTCA	CCATCCGGTAATGCAATTTA
AUBES4605	CGGAGGTCATGCACAGTCT	TTATCCTTTCAGCGCCTTTC
AUBES4604	CTCACGGATGGAGCTGAGAT	CCACAAGCTGGAGGTCAGAT
AUBES4603	CAATCGCAGGTGGTCAGACT	TCGACTCATCTGTGAGCTGAA
AUBES4593	TGGAAGCAGGAAGAGTGACC	ACTGGGTCAGCTGGAGTACC
AUBES4591	ACACTACCGCTTACCCGAAA	TGCAACCTTTATGCTCCTCA
AUBES4586	GGCTTGTGCAGTGTTGATTG	TGCAGTTCCTGACTGCTGAA
AUBES4585	GCAAAGACTCCTGGGTAACG	TTGCAACTTGAAGCCTCCTT
AUBES4583	CAGCGTTAATGACGCAAGAA	TCCAGTCCTCCGAGTCAAAC
AUBES4582	GGCTCAACTCTCCCACAAGA	CTCCATACCGTGTCCTGCTT
AUBES4581	TGGTTAGTGGTGGTGAAGCA	CAATTGGTGGACAAGATCAGG
AUBES4580	GCTGAAACGCTTTAGGTCCA	CGATTTGAGACGCATCTGTT
AUBES4578	TGGAAGCAGGAAGAGTGACC	ACTGGGTCAGCTGGAGTACC
AUBES4575	CGCTAAGTTCCTGCCTTTTG	CCTTACACCAACGGTCACAC
AUBES4574	TGAATCCATGGAGCAACATC	TGTGATGGGGAAAAGTGGAT
AUBES4571	TGCCATAGAGTGAGCCGAGT	GGGGAACCTTTGTGAACCTT
AUBES4570	TTCTTCCCTTCCTTCCTTCC	ATGCAGGGAATTGGTGAGAG
AUBES4567	ACCTGCAGGATTCAGGAGTG	AGGGGGTGAACTTTCAGTGAC
AUBES4565	TCAGTTGACTTTGGGGGAAA	TTGTGCTATTGTGACCTGCTG
AUBES4558	TGATCAACGCACACAAGTCC	CACACAACAAGCTTCTGGACA
AUBES4550	AGGCCAGATGCCTACCATAG	CCAGTGCACCAGTGTTATCTG
AUBES4548	GAGAGGACGTCGGTGTAGGA	AACACCCCCTCATTTTCCAC
AUBES4546	GCCTAAGAGACTGGCTGTGG	CGGAGAAATCATGTCCTGGT
AUBES4543	TGCGGGTTTTGTTTTTCTTC	CGAACGTGCTAACCACTAAGC
AUBES4541	CTCCAACCTCATCAGGCATT	TGCAAACACAAAACAGGTGTG
AUBES4540	GTGGCTTTACCTCTGGGACA	GAGCTCATTCAACCGACTTG
AUBES4536	TGCTTTGGATAAAAGTGTCTGC	CTTCCATGCTGGACAGAGGT
AUBES4534	CATTGCACATCAACAAACCA	CACGGAATTCGTGACAAGTG
AUBES4530	AAGAAGCGTTTGCAAAAAGG	GGGCACTGCAGGAAGATAGA
AUBES4529	CGGAGCAATACATCACTGGA	TCTCCACCACTCACATGCAC
AUBES4528	GACCTTGCCATTCCAACAGT	TCTGTCATGTGTTGGGCTTT
AUBES4526	AAATTGATCACTGAACTCATTCG	CCATCCACGTCCTTGTAGTG
AUBES4525	ACACACCACAGCAAGCAGAG	GTTTGCTGGTGTGTTGCACT
AUBES4520	CTTCAACCAGGCCACAAATC	AGTGTTCCACTTGCATTGAGC
AUBES4517	ATCCAGCGCATCCCATTAT	GATTTTACGCCTGCGTCCT
AUBES4516	CGATATCATCGTCGCAAATTC	AAATGCCGAATGACAGTTCC
AUBES4512	TGCAGTCCATCTCTGGAACA	GCAGCTGGAGTTTCATCACA
AUBES4507	TACAGCTCCCTGCATTCCTC	GGCTGTCTGCTTGGTCTTGT
AUBES4506	CTGTTCCAGCACATTCGAGA	CGGATATGAATACGAGGAGGA
AUBES4502	TTAACTCTGCCTCGCCCTTA	CATAGCCACCCTAGCCAGAT
AUBES4501	CACACCATTCCGTACACGTC	AGCAGAGGAAGAGTCGAAGG
AUBES4498	TCAGATCACGTCGCTACTGG	CTCCATTGATGCAGTGAAGC
AUBES4497	TTGGTTTATCAGCGGGACAT	CGCTCCTACTGTGGTGATTG
AUBES4496	TTGCTTTAGTGTTTCGTGAATTG	GCAGATCCCACCCTAACTTG
AUBES4493	TCTGATTGTCATCTCATTGCTTG	TCGAATTTTGGAGGATTTGC
AUBES4491	AACAATTTCCATGGCGTGTA	AAGTGGCACAGGGAAAAGAG
AUBES4488	CTTTGGGAGAGCTCACTTGC	CTGAATGCATGGTGGTTGAG
AUBES4487	TGGCAACTGGAACAGTGGTA	CGGGTGATGGATAGATGGAT
AUBES4484	CTGGTTCAGCATGGATCAGT	TTCACAGCCTTCTTTGCTCA
AUBES4483	TGTAGACTGAGCTTTGTGGTTCA	CATTGCTGTAGGGCTCTTTACAT
AUBES4480	CGTGTTGGGTTTCATTTTGTT	GCAGCATGTCATGGCTTTAG
AUBES4479	GCCAGGGAGAACTGAAGACA	AACACTGAGCCAAGGAGCAT
AUBES4478	TTGCAGGGAGGAAAAGTGAC	TCTCTCCATCTCTCCCTGTCTC
AUBES4476	ACCTGTACGGTCGTCACTCC	TTAAGCTATTGCTCCGTCCA
AUBES4475	AATACGTGCGACTTGTCCAG	CAAAGGGTTTCCTTGTCGAG
AUBES4474	TCCAGTGGAAAAGAGCCTGT	AGAAGCCAGAAGTGGGTTGA
AUBES4473	AGAAGTTGGGTTTGCACTCG	AGCTCCTCACTGGACCAAAG
AUBES4472	TCAGGACGGTTCGGAAACTA	AAGCAACGGTGGGAGAATTA
AUBES4470	CGCTTCAGCGGACATAAAGT	GGGACTTCCACTGCATTTTC
AUBES4468	CATTAGGCCTAGGGGATGGT	CGTGTCCAAAGGGTCCATAG
AUBES4467	AGGACGTTCTGATCGACTGC	TGTTCTTGTTAACCCGAAAAGAG
AUBES4464	CGTGCTTGTGTTTGTCTGCT	ACCCAATTTGTCAGCGCTAT
AUBES4462	ACATGTTTGCAATGCCACTC	TGGCAGCTCTGCTACCACT
AUBES4461	AGATGTAGCGCATCCACCTC	GGTCCTGTAAGTAGGGACCAGT
AUBES4460	AGCTCAGCCAGTCACTCCTT	CAGCAGTCACCATTTACACTCA
AUBES4459	TTTGTATTCCGTCTCCTCTGC	AAGTGCTCCGAGTGCTGTGT
AUBES4457	TTTCACTGCAGAACCTGCATA	TGTAACTTGTCGATGGCGAAT
AUBES4456	CAGCAAGCTAACGGTGATGA	GCCCAGGAACAAAAACTGAA
AUBES4455	CCATGTGCTGAGTATGGCATT	GGAGCCTCGAAGTTGATGTT
AUBES4452	CGCTTAATAGGACGGCTGTT	ATGAAAGGCACAGACGCATT
AUBES4451	GACCCCAATCCACCTACTGA	TTCCTACCTGCCATTCCTCA
AUBES4450	TGCCTTAAGGGAGCTCACAA	ACATGCAAACTCCGCACAC
AUBES4447	GGATTCAACAATGAGCAGCA	CTGTCTGAAGGGATGCTGTG
AUBES4445	CACAGCGAGATTCCAGATCA	GACTTGGGACACGCCTTTAAT
AUBES4443	TGCATGTTTACCATTGCATC	TGAGAGGTGCTTCCCATAGC
AUBES4442	CCTGGCATTAAGAGGCGTTA	TTGAGGTTGTGTTCACAGTGC
AUBES4441	GATCCATTGGAACACACGAA	AATTACCTGGATGTGGCTTCC
AUBES4440	GCATAAACGTTGGGTTCAGG	GTCTGCGCAAGTGTGAATGT
AUBES4439	GAGGAAGCAGGCTGAACTTG	CCAGGAGCTCTGTCTCGACT
AUBES4437	GCACAATAATGTGGTGGGAAA	CGCTTTCTCTTTGTCCTGCT
AUBES4436	GACAGCAGAGGTGGCCAATA	AACAGCACTCTTGCTTGTGC
AUBES4435	CGAATTCGCCTGCTATCTGT	GCACAAGGAGTTGTGGGAAA
AUBES4434	GTTCGAATTCGCCTGCTATC	GCACAAGGAGTTGTGGGAAA
AUBES4433	TGACTTTGCATTCTGTCTTTTC	TCGACTCGTCCTCTTTTTGG
AUBES4432	CGAGTCCTCTGGGAAATGAC	GCAGGAGCAAACAGACTTGG
AUBES4431	GGATTCAACAATGAGCAGCA	CTGTCTGAAGGGATGCTGTG
AUBES4430	ACATCCGAGATGAGTCAAACTT	GAGGGAATGACAGAGGCAAC
AUBES4429	GCCATCCCAAACGTGTACTT	GCCAAAGATCGAAGGTGAAA
AUBES4428	CGACAAAAACAAATCCGATG	GGAAACGTGCTAACCGCTAA
AUBES4427	TGCATGTTTACCATTGCATC	TGAGAGGTGCTTCCCATAGC
AUBES4426	CCTGGCATTAAGAGGCGTTA	TTGAGGTTGTGTTCACAGTGC
AUBES4425	GATCCATTGGAACACACGAA	ATTACCTGGATGTGGCTTCC
AUBES4424	GCATAAACGTTGGGTTCAGG	GTCTGCGCAAGTGTGAATGT
AUBES4419	GCTTGTTGTCACAGCGTTCA	CGAACACACAACTCCCACAT
AUBES4416	ATTCCAGCCACAATTCCTGA	GCCTTGGACTTGCAGCTACT
AUBES4415	CGGCTGGATCGTTAAAATGT	CGCGTAATGATCCGGAAA
AUBES4414	CAGGACCTTCTGCTCACCAT	GCACTCGTCTTTCAGCCTCT
AUBES4412	CTGGGATAGGCTCCAGGTTC	GGGGATGCAGTTAAACTCAGG
AUBES4411	CCACCCCGTCATTGATTTAT	TCGGCATGTCCACAGTGTAT
AUBES4410	CGCACGACTCGGACAGTAAT	TCTGAGTCACGCCATGAAAG
AUBES4407	TGTAGCTTGTCCTGTAATATGCAC	GCTGCAATTATCCAAGATGG
AUBES4406	GGTTATCGGTATCGGCTGAG	CAGTGTTGTCGCATGAACAG
AUBES4405	TCCTTCTCCGCCGTATTATC	TGATTGCAGCTCGTTAGTGG
AUBES4404	CATGAGCGTTAGTGCTTTGC	CTGCCAACCATTACGAGGTT
AUBES4403	TCAGAAAGCTGGGGAGAAAA	GCATCGACCGAATGTAAGTG
AUBES4402	CAGCTCTGAGCAGACACACA	CTGTTTCCCTCCTTTCATGC
AUBES4401	GACACCCTGAGTAAAAGGCTTG	AACACGTTTGGTCGTTAGCA
AUBES4400	TCACCATGCTCAATGAAATGT	GCTTGCTCAATGGCTACAAA
AUBES4399	TCGAAGACGAGTGATCCTGTT	GGAAAGTGAAAATCAAAAGAAAAT
AUBES4397	CCATTAATGAGCCGCTATCC	TGGTTATCCAACTCTGCTTGTG
AUBES4395	CTCAGGCATTACAGCAGCAG	AGCCCTGTGACCTAGTGAGG
AUBES4392	TGTGGAACTGTGCCTTTTCA	CTGTGTTCCAGCATACTGAAGG
AUBES4389	GGCTGCACATTCTAACAAGG	GATGCCATCCAGTGCATTTA
AUBES4385	GTTTACCACATTCATGCCAGAG	TGATGTGAGTCTTGCCAATCA
AUBES4384	GCTGCAATTCGGAGCATAAT	GGGTACTGGAGTCCCACAGA
AUBES4383	GCTGCAATTCGGAGCATAAT	GGGTACTGGAGTCCCACAGA
AUBES4381	GAAGTCAAGCGCACTCTTCAG	GAAGATGTATCATATGGATAGCTAGGA
AUBES4379	GATGGGGTCCTGAAACACTG	CACTCCCCATCACCAAGAAC
AUBES4378	TTGTGCCTAAGCAACAACTCA	CATGGCCCAGTGAAATCTG
AUBES4375	ATCCACAAATGATCCGAAGTG	CCGAAGCACTAACAACAGCA
AUBES4374	CTGGAGTGCGATCTGTGAAG	CAGGGTTCAGTGACGTAGAGC
AUBES4373	AGCTCCATGGATGGAATTTG	AACGTCAGTTGCTGGGATTT
AUBES4372	AGCTCCATGGATGGAATTTG	AACGTCAGTTGCTGGGATTT
AUBES4371	GAGGCGTGTGTGGTTATGTTT	TCCCAACAGTCAGTGATTCAG
AUBES4370	ACACGAAGCTCCATGTAGGG	GAAAGCGCAACACATTGAGA
AUBES4369	CCAGGCCAGAAGTCTTCATT	TGCAGCTGGGAGCTCTTATT
AUBES4368	GACACCCAGTCAGTTGTGGA	CAGTGTTTGGTAGGGTTGCAT
AUBES4367	CCTCTGTGGCTTTTCAAAGAA	AAATCCATGTTAGCGGCTTT
AUBES4366	GATCATTTTCCGGAAGGACA	GGGAGCATGTCACCAATCAT
AUBES4362	TTGCACCACAGTGCTATTGA	TCCCTTGGTATCTTCATTTTCTG
AUBES4361	GCTCAAAAGGTGAGGACTGC	AGATCGGGTTTCTGTCTGGA
AUBES4360	ACCAGGAGCTTGTTGACTGG	TTCGTTCAGGAATCCAAACA
AUBES4357	GAGTGGTCCTGAGAGGTGGA	TGCTATGCTGCAAAGACAATG
AUBES4355	CTGCATGAGATTTAAAGGGGTTA	GGGGTCATGACGTGAGAAAT
AUBES4354	GTTAGCTGCAAGGGAATCAA	TCCATGAAATGTCCGCATAA
AUBES4351	CTGCATAATACCAAGCAACTTGT	TGTGCAGTCGTGAGATGTGA
AUBES4350	TGCCCTAAAAAGCTTTCCCTA	CATTATGGGTGCTGTTCACCT
AUBES4349	CTCGGTCAGCTGATGGGTAG	TTCTCCCAATCTGACGTGCT
AUBES4348	GCAGCACAATTGGCATTATT	TTCCCTGTGACCCTGAAAAG
AUBES4346	CGTGTTTGTGTAAATGCGTGT	GGGTGAATGTGCTTTATGCTC
AUBES4345	AGTTGGCCATCAAAAACCAG	CAGGAAGCGTTTTGACTTGA
AUBES4343	GGTGGGTTGCTCACAAGTTT	CAAATGCCGGTATGTGGATT
AUBES4341	ACCTCCCTCCCTGACGTAAC	ATGGCAACCAGCTGAAAAAC
AUBES4339	AGGAAACAGGCCAGACTGAA	GAAGATGGATGGATGGGAGT
AUBES4338	AGGCCCAGTTGGTATTGGAT	CAATGATTCTCATCCCCAAA
AUBES4337	GACGGGCCGTTGAATTATTA	ACTTATCGCACATGCTCTCG
AUBES4334	TTCGACATAGAACACCAGAAGG	TTTGTTTTCAGGCTTGTTTTG
AUBES4333	TCCCACACTTTGTGGTTTCC	GCTGTGGAACGTCCACTAAAC
AUBES4331	AGTGGTCCTATGGGGTTCCT	GCACTGCAGCTGGAAATACC
AUBES4329	TGGCTCAGCATGTTTTTCAG	GCTTCAGCACTGTGAGATCATT
AUBES4327	TGTTCCTGCCACTGTGTTTC	ATCTGACCGTCTGTTTGCAG
AUBES4323	TTTTCATTTCTCAGGGTCCAG	CCCTTTCACTGTCAAGCACA
AUBES4322	TGCTTGTCCGAATGTGTGTT	GTGGGGTGAACCTCAAAATG
AUBES4321	GGAGTGTCCAGTGTCAGCAG	GTGGAACTGATTGTTGGAAGC
AUBES4320	GAGAACACGTGCTGAAAAGC	TGGCTGTAATTATCCGCTCTC
AUBES4317	GAACTCATGATGGAGCAGCA	TCAGACCACCCAGTGTTTAGG
AUBES4315	CCATTCTCATGCACAAAAGC	AACCGAATATGTGACCCACAA
AUBES4314	AGACGGAGCAGAAACAGCAG	GCTTGCAATTCTCTCACACC
AUBES4313	GGTGCTCGCTGTTAACCTCT	TCTCCGAGCCGCTGTTATAG
AUBES4312	GGACTGGAAGCCAGATGTGT	ACCCGAGAACACAAACTTGA
AUBES4311	GCTGGTCCAGGATCTGTGAT	AGCACGTTCCTCTCCTTCAG
AUBES4310	CGTTAAGGCTGCTCCAGATT	AGGGAAAGCACACGACAGTT
AUBES4305	TTCTGTGGAAGCCCTGAACT	AGGTTCCACTGTGACCCTGA
AUBES4304	TCCTGACTGCCAACAGAGATT	CCACCATGCATTTTGTTTTG
AUBES4302	TCGGTTAACATGCATCCGTA	GAGCTGACAGAGGGGAAAGG
AUBES4295	CTTGCGTGCACAGATACAGC	CACTGAGCTGCCTTCCAAAT
AUBES4294	TCACATGTAGGGCATGTGGT	TCTGGTGAAAATGTCCTCATTG
AUBES4293	TGGTGAACAATGAGTGTCAGG	ATAGCCGGTTGTGCTTCTTG
AUBES4292	GCCATGAAAATAAAGCCACAT	TGCCATTAATCTCTGTGAAAAAG
AUBES4291	CGACGGACGAACTCCTATGT	TCCAGTCGCTTACACTGAGC
AUBES4290	TTCTTCACAGCAGGTCGTTG	ATGGCTATTTGGAGCGTGTC
AUBES4289	TCTTCACGTAGGGATGACACC	CTGGAGCCATATTCGCAGTT
AUBES4285	GGTCTTTTCTAGATCGGTGTGG	TGCTACGTGGTTTGACCTTG
AUBES4284	ATTTCAGCACCTTGGAGAGG	GGGATGTGCCACTAGAGACC
AUBES4283	TTGTGTTCATGCAGCATAAGATT	TGACAAACACAGATGCCACA
AUBES4280	TGTTTAAAGTTGAAGTGAATGGAG	TCCCAAAGACTACGTGCAAGA
AUBES4279	TTTCAGATGACACCAATTTCAA	ACAAAATCAGCAGGGGATCA
AUBES4277	TTGCTGGCTTTGCATCTGTA	ATTGTGCATGGTTGCTCTGA
AUBES4276	GAGTGTTCTTTGCTGCCGTA	ACATTCTTTCAAGGGCTCCA
AUBES4275	GGTTTGTGCAGGCATAGAGA	CCTCACAGGAACACATGCAG
AUBES4274	CAGTGGTACTCAAAGTGGGATG	GCTGCCATAGACACCCTAGC
AUBES4271	GGTGAAGGCATGGAGGTTAC	GACCTCTGCACCTTCCTCCT
AUBES4270	CAAACCTGTGTGACTGTGAGC	GAAAGTGAGGGCGTGTCACTA
AUBES4269	AGTGACGTCATGCTCCGAGT	ATGCCCCCATTACTGTGAAC
AUBES4268	GTGCACTATCTGCCAGCATC	CGTCACTCGTCACACTTAGC
AUBES4266	AGCTGCCACTTTCACTTTCTG	CAGCTATCGGATCCCCATTA
AUBES4264	TGTCACACTGGTGTCAAGAGC	ACGGTCTTTGGATGTTGGAC
AUBES4263	TGATGGACACTCCTCATGAAC	TGCATGTCTGTCAGAGCAAGTAT
AUBES4260	GCTAAAACTGCGCTCACACC	AGCGGCACATAGATCAGTCC
AUBES4259	TCTCAGATTCCCCAGCTCAG	TCATTCCCTCCAACTGCTTC
AUBES4257	CCACTCACCTGTGCCTGAAT	CTCCACGCACACAGAATATGA
AUBES4255	AAGAGATGGGTGCTCAGCTT	GCCAGCTCATGAAGTGTTTG
AUBES4254	CTTATGTTGCTGAGGAGTCTGG	TTGGTTAGGGGAGGTTAGCA
AUBES4249	CTTACGAAGCAGGCGAGAGT	TGCACGAGACTACAGGAGGA
AUBES4247	CAGTCATGTCAGGAGGGTGA	CTTTGATGTCCAATGCACCA
AUBES4244	CTGTGCATGAGGCAGACATT	ATGGCTCCATCCATCCAGTT
AUBES4243	GATCCGCTCTTAGACACGAGA	TTGACAGTGCGGTAAGATGC
AUBES4242	CGGCCTCTATAGGCGAAATA	AGGAGATTTCCTCCCCTCAT
AUBES4241	CCAAGCCCAAGCATAATGAA	GCCATGTGGAACCTGAGAGT
AUBES4240	GCAAAGACCCCACTTCTGAG	ATCGGCAATTAACGGCACTA
AUBES4239	CAGGGGATTTGTCCCATCTA	TTGCCCATAACACAGGGTCT
AUBES4237	CACCTGTTTGGTTTGACTGG	TTCAGACTTCCTGCTTCCAA
AUBES4236	AATCGCATGCAATCATAAAGTG	ACACTCCCTGAATGGGACAC
AUBES4234	TGAGCTTGGATCAATGTATTCC	TGACCCCTAAATCATCCCCTA
AUBES4233	TTCGTGACTTGAAAAACAGCA	AATTTCGTGCGAAGCCTTTA
AUBES4232	GCATGTTCCTTTCAGCCTTC	CTTACAGCCCTCCAGCAGAG
AUBES4231	TTCTTTCTCTCGCAATCTTCCT	ATTGTCCTCGCTTTGGAAAA
AUBES4230	TGCATGGAGGAGTGAAGTTG	AGGGTGATGAGAAGCAGCAG
AUBES4229	GACTGCATCTGCACCAGCTA	TCTCGATACTTTCTCTTTTGCTCTC
AUBES4228	GAGCTGTCTGCACCTAAAGGA	TGGTGAGACAATTCGCAAAG
AUBES4226	CTGCTGGAAGATCCAACCAC	GCAGACCACCATGACATCAC
AUBES4225	CTGGAAGATAATGGCCGAAG	AAACACAGCATCTGCATTTGA
AUBES4224	CTTTTTCCCAAATGCCACTG	TTCATGCCATGTTTCCTGTG
AUBES4221	CAACCTACCGGGATTTCTGA	CTCTTGGCCATCTTGGTGTT
AUBES4220	GTAAGGCATGCACAAACACG	TGCACACAGTCTGTCCAAGT
AUBES4218	ACAGGCAGTTTAAAACCATTCC	CCTTCCACCTTCCATTTTTG
AUBES4208	GCATGGAGACACTGATGGAC	TGCAAATTACAAGGTGATTCCA
AUBES4200	TCAGGCATTAGGATCGCTTT	ACTGCTGTTCTGGAGCCAAG
AUBES4194	GCTGAGAATTAGCCGCACAT	ATGACAGCTGGCGTAACACA
AUBES4192	TTCCCATGAAGGTGACTCGT	CGCAGCTGGAGTAGTTCCTT
AUBES4185	GCCACAGATTCCTCCTGAGA	GGACCAGACGTGCTCTTGTT
AUBES4183	GACTGCAGGACACCCCTTC	GCACTTATTGCTCATGCTTCC
AUBES4182	ACCGACTCATGACCTCACAG	CCGAAGAAATCGGTGGTAAC
AUBES4180	GCTTCTGTATGCATGGACTTCT	AGGGATTGAGATTACACGGAGA
AUBES4179	GCAGCTCTGAGAGTCCTTCC	TGACAACGGCAAAATAGACAA
AUBES4170	AAATCGGTCGGTTCACTGAG	GGGCGAAAGACGTAAAGGAG
AUBES4166	CGCACATTTTGAAATCTCTCC	TTTAATCGTGTGTATTTGAGTATCG
AUBES4165	GCTGCTGCCAGTTTATGGAT	CCTTCATGCCTCATCACGTA
AUBES4163	TACATGTGGCTGGAATGCAC	CCTGTGTCCAGGTTCTCCAG
AUBES4162	GTGCCCTTTGGAAAACTGG	CACATGTTGGAAGCAGACCA
AUBES4155	TTCCCCTTCCATTTCTCTGTT	AACAGATGCTGAAACCAAAGC
AUBES4154	CGATCGAATTGTCTGTCACG	CCTATGAAGGGAGCCAGGAT
AUBES4150	ACAAGGAAAAGCTCAATCGAA	GCAAACATCAGGAAATGAAGG
AUBES4149	CGCCTACCAAATTCACCTTC	CCTACCCAAAACATAGCCACA
AUBES4148	GAGAGCATGGCCAACAACAT	TTGTCAGCAGACAGGTAGGC
AUBES4147	TGTGTATTTACAGCCAAAAGCA	GGGAAACATGTTAAAATTCTTGTCT
AUBES4144	GGATATCTTTGAGCAGCAGGA	GAATTGCCGAACAAATCTGG
AUBES4143	TTGGTTTCAAGCCGCTTAGT	AGAACAGATGGGGTGGTCCT
AUBES4142	GAATTCTGCCCATTTCTGGA	ACTGGATGTGCCGGATTACT
AUBES4141	AGATCAACCGCTTCCAATCA	TCCATGAGTTCTTCCGCTAAG
AUBES4139	CCCCACTTCCAGACTATTCCT	ACCATGATGAAGCGCTAATG
AUBES4138	TTCTCACAGCCTTCTTTGCTC	CAGCTCCAGTTTCCTGGTTC
AUBES4137	ATACACATCCTGCCCTCGAT	CACTGTTCCTGCCTTCACAT
AUBES4136	TCAGGGGAAATTATGGCAAG	TGGCAGTGCTTTATCCACAC
AUBES4135	TTTGTCTTGGTCGTCTTGGTC	CCAGTGTTAAAGACAATGTTGACG
AUBES4134	CAGAGACCAGCACAAAGACG	CAGAGGCAGACCCATAACCA
AUBES4132	CACTGGGGTGGTATCCTCAT	CCACCTCGGCAGTACTTTTC
AUBES4130	CTTCATTGATTTGGCAGATTGA	CCAGTTCCTATGTCTGGACTCTG
AUBES4127	GGGGACTTCTTATGGCCTTC	AAATAGTGAGATAATCACCTGAACAC
AUBES4126	TCTGCTTTGTTGGTGGTAAGG	TGCCACAAAAACACATCCAT
AUBES4124	AGCAACAAATGGGGTGACTC	TGTCTGGACAAAGGATGTTCA
AUBES4122	GCTTTACATTGACCTCGCTTG	TGCCCTTACTCACTGAAGTGTC
AUBES4119	TTCACAGGTGGGTGAAAACA	TTTCTATCCGCCAGTTCCTC
AUBES4118	CCGTGGAGACTCCTTTCAGA	GAAGTCCACTTCAGCCATGT
AUBES4116	GGGCACATGTGGTAAAGAGG	AGGGAGAGGGATGGAGAGAG
AUBES4115	GGGAGGGTTAAAGAGGGTGT	GATCCTGCATGAGTGTCGTC
AUBES4113	CATCCTGGCGAAGCTCTTTA	CCATGCGAGGCCAGTAACTA
AUBES4111	TTTGCGTTACAGCAACATGA	TAATGCAGCCCAAATGTGAT
AUBES4109	ATTGGGGTAGAGGCAGTTGT	CCTGGAACCATATTGGCATT
AUBES4108	ATCCCGCAGACACAGAGAAT	CTACAGACATGCCGGTCTCA
AUBES4107	GCATATGCCTGCACAAAGAG	GTGGTGACATGCTGTGAATG
AUBES4103	GCAGAAGGAAACACCACCTC	CCCCACGACCCTGTGTACTA
AUBES4101	TTCTCACAGCCTTCTTTGCTC	CAGCTCCAGTTTCCTGGTTC
AUBES4099	GCACTGAGGTTTCAGTGAGC	TCTCTGCCTCAGACCGACTT
AUBES4098	TGAACTGAACCCCCAGAGAG	TGAACAGGGAGCTGAACTGA
AUBES4097	GCCACTTTCTGATGGGACAT	TGTCATGCACAATGTGTCAACT
AUBES4096	TGATTGATGGGCATATTGTAGG	CATTAAATGCACGCAGTTGG
AUBES4095	CACACGCTGCACACAATAGAT	TCATTGCTTTTGTTCGATGC
AUBES4094	GCCGCTTACTTCAGAGAGCA	CAGGTCCAGCATTCAATCAG
AUBES4087	CTGGCCCTTTAATTCAGCAC	CTGTTGTGTGGAACGGTGAC
AUBES4086	CCTGGTTTTAAAAGCGCAAC	TCATTACAACGCCATCCTGA
AUBES4084	GACAAGACGATTTAACGCAGTG	CCTCACACTCACCACTCAGC
AUBES4083	GACAAGACGATTTAACGCAGTG	CCTCACACTCACCACTCAGC
AUBES4082	GGACACACTGGGCTGAAAAA	CATGGCTGACAAGCAAATGT
AUBES4080	CACCATCAAACACTGGCATC	CCTCATGCCCTGAAATATGC
AUBES4076	CACGCTTACTTCGGACAGTG	AAATCTCTCCTCGCCTCCAC
AUBES4075	AGTGGGGAGTCCGAGAGTTT	GCTGCTGATTAGCATATCACTTG
AUBES4071	GGTGTCGTCCAGAAACGAG	GTCCCAACTTCCTGTTTTGC
AUBES4070	GGTGTCGTCCAGAAACGAG	GTCCCAACTTCCTGTTTTGC
AUBES4069	AGTGAATCCTCAGGCCCATA	TTGGGGTTGTAATTGTCAGC
AUBES4066	CGCTATTTGAGTGGCCAAAG	TGGCCCAGTGAAAAACTCTT
AUBES4064	AGAATTTCTCCGGCCTTCAC	CTCACGTGGATGAAGTGTGC
AUBES4063	TAACGGTTGTGGGAGGAGAC	GGAGTTGGGGAGGTCAGAGT
AUBES4062	TGGCCAGGATGAATCAATTAC	CAATGTTCTGAAATGACCCAAA
AUBES4061	CTGGCCAGGATGAATCAATTA	CAATGTTCTGAAATGACCCAAA
AUBES4060	GCTTCTCAAACACTCCTCAGC	AGGGAATCGTTACGTGCTGT
AUBES4058	GCACAACAGTGAGCGATTCC	GGTTTCGATACGGAGCGTTA
AUBES4052	ATTGGCATTTTGAGCCATTC	CAATGCCCAATTTGTACGAC
AUBES4051	TTGTGTGCAATTCAGGAAGG	TGGATATTTGGGACAAAAAGA
AUBES4049	CCATGCTGACATCACAGGAG	TCAAAGCAGTCGGTCTGATG
AUBES4045	TGCCTACTCTTCCTCCATGTG	AGGTGTGCGGTGTGGATAAT
AUBES4044	TGTGTCATGGCTCACACTATG	GTTTCTTTGAGGAGCGCTTG
AUBES4036	CCTCTTTCTCAAGTTGGTTGG	CGAAGTCAGGGACCAGAAAC
AUBES4035	CCACTCTGACATTCCCACAG	TGGGTTTGGTTTGACCAGAG
AUBES4034	GCAGTTGGGTGTGGTTTCTC	ACTGCTGCCAGTGTGAAATG
AUBES4032	GACTCCTGAGCTGGTCTTGG	ACGGTGGAAGCAACTGAGAG
AUBES4031	CTGCGGCATAAAACAAAATG	GTGGTATAATCCGCAAGAACG
AUBES4030	CAGTTGCCTCACACTTGAGC	CTCTGTACCGCTGCATCTGA
AUBES4029	CACGTAGGCGTAGATCGTCA	TACGTGGACCATAGCCTTCC
AUBES4028	TCTCTGCATCACTGCGAAAT	TTGACTTGGCCTCCAAATTC
AUBES4027	GCATTGCCGATCAGATTACA	CCATGCAAAAATGCTTTCCT
AUBES4026	TTTACTGGCCTCCAACTGGT	GATGGAACCCCATCAGACTC
AUBES4025	CGGTCCTCAACCACTACCAG	GTATGGTGTCCTGGCGAAAT
AUBES4024	ATCCAGAGGCAGTCCTGGTA	TCTGGTTTCCTCCCAGTGTC
AUBES4022	GAGCCTATCCCAGGGAACTG	TTACGGGGTTTACCTTGTGC
AUBES4021	ATTGGGTGCGTGCTATTTTC	GGTAGGTGGATTGGCACTTG
AUBES4020	TGAACCCATTTTGCACAGAG	ACCATTTACATGGGGGAACA
AUBES4019	GGTGTGTGAACAGCACAAGC	AAACCTTTTCACTGCCATCG
AUBES4017	GCCGTCTCTGGTTTTATTGC	AGCAAGACCACATGTGCAAG
AUBES4012	TGTAAGCTCCATCCCCAGAG	TCAGATGAATGGACGAGTGC
AUBES4010	GCAGGAGCCTGTATTCTTCC	TTGCCTCCAGATGCTAAACA
AUBES4009	TCATCCCATCAACTCTGCTG	GATCCTGGTGGTGTCAGAGG
AUBES4007	GAGGATGAGGACTGGCAGAG	GAGGTTGCACACACACACATC
AUBES4006	CACGGGCACAGAAAGGTATT	TGGTGTTTGCTTGATTTTGC
AUBES4005	TTGTGATGTGGTGTAAGGTTCC	TATCATGGGCAATGCACCTA
AUBES4003	TGACCTTTTCATTTGTGATGATG	CTCCTGAGCCTTGACTCCTG
AUBES4000	TTGTGACCTTAATCCACACTGC	CAGACCTCAGAGACCAGCAA
AUBES3995	TCTTTTCGTAATAGTTGCGTCCT	AAAGAATGAATTGGGGTCCA
AUBES3993	CCAATCAGGACATCCACCAT	GACGCCCGCAAATCATATAC
AUBES3992	CCAGCCATAATCACTGTGGA	AGGGAACACCATGATCAGTACC
AUBES3991	GTTGAACGTTGCTGAAATGG	TGCAGTTTTCTCCCCAAATG
AUBES3989	GATCCGAGAGAGGGAAAAGC	TAGCGCTGGAGCTAACACTG
AUBES3988	GGCTAGGCCCAAATAAAAGG	TCAGCAGGGGATCAAATACT
AUBES3987	GGAGATGGCCGAATATAAAGC	ACGTCTGCTGCTTTGCTTCT
AUBES3985	CTTCCCCAGTCCAAAGACAC	GGTGGAATCGACACAAGGAG
AUBES3980	GAGGTTCCACACTGGCATTA	ATGCCTAGCCTTTCACTCCA
AUBES3979	AGCCTCTGACTTTTCACAAACA	AAATGGCTCTCCTCCAACAG
AUBES3978	AGAACAACGACCAGGGACTC	TGTGGACTTGTCTTGCGAAT
AUBES3977	TGATGGAGTTCACCAAGTTCC	CCAGCCAATCAGATTCCACT
AUBES3975	CAATGTCTCATTTGCACAGC	TTTGGTCAAGTCAAAATGATGAG
AUBES3972	ACCTCGGATAAAGCAAATGG	TCATGTTTTCCCTCAGAGGAC
AUBES3971	GACCCATGATGCACTGAAGA	CAGCTGTGTAGCACGTTTACC
AUBES3970	CCTGCAATGCTACAATACCG	TCCAAATGAATGGATGGATG
AUBES3969	GCAGGGAGCATGTTGCTAA	TCGCTACAGCTCAGAACGAA
AUBES3967	CACCAGCACAAACAGAGCTT	TTTTGGCCTGGTTAAAAGACA
AUBES3965	AGCCTGGCTCTACACTGGAC	GAACCTTTCACCGCAATGTC
AUBES3963	TCTGTGAATGATCCCCATCC	TACAGACTCGATCCCCTTCG
AUBES3959	CACTGGTCACAGGGGGATAC	CACAGTGCTGGAGATGTTGG
AUBES3957	ACCTGATTGGCCCTGAGAC	ACCCTCGGACATATCCATCG
AUBES3956	TTGCGATATCCGTAAGTCATGT	GCCGTACAAAGCAGCTCATC
AUBES3955	TTCTGTGCACACGATACCATC	TCACATTGCACAGATGCTCA
AUBES3954	AATGGCATCTTCTCCATGCT	GGATGCATTTGCACAGTGTC
AUBES3952	AGCGGATGGAAAGCTCTAGG	GGTCCGATAAATAGCCAACG
AUBES3948	TTGACCCCCGTTCTTTTAAC	CCATTCGCTCAGATAGGAAAA
AUBES3947	GCACACAAGCCTAAACATGC	CCCAAACACCATAACAAGGAG
AUBES3946	CCAAAAGGCGTTCTAAGCTG	CCCTCCAAAAACATTGGAAC
AUBES3944	CCAGATCACTCAAAGGTCCAG	TGAATGATGGGAATGTCTGA
AUBES3943	GTTAATGCCGACGCTGTTG	TTTTAAAGTTTGAAGAATTTACTGCTG
AUBES3942	TGTTGGTGGTGCTAGAAGGA	TTCTTGGGGGATTGTTCTTG
AUBES3940	TCTGGAACACTCTGCCATACA	ATGTCCGAGGACTCATTTGC
AUBES3939	AAAAAGAAGGGTGCTAAATGGA	ATGCGCATAGGACATTGACA
AUBES3938	GTGGTGGGGAAGGTCTGTAG	AGTGAGTATGCCCCAAGAGG
AUBES3937	GGCCGATGTCACTCTGAATA	ATCAGAGTTTGCGGAGATGG
AUBES3934	TCAGGCTGCCTTTGTTTTATG	GCATGATGAAAAAGTGGGTTG
AUBES3933	AAGCCTGCAGCTGTTAGGAG	TCGGAAAGGAACAGAAAACG
AUBES3932	TACTGGCAGCTTCGGGTAAT	TGCTGACATTGGAGACTCCTT
AUBES3931	TTCGTGTACGAGTGCCAAGA	CACTGCTCGGGGATGTAACT
AUBES3927	TTGTCCCACTTCTCCCACAC	TGGAGCTTCAGGAGAAGGAG
AUBES3926	GCTTCACTAAGACGCCCTCA	TCTTTCCAAGCCTCATTTCG
AUBES3925	CCTCTCATGCTCCCATGAAT	CGTGATCGGCTCTATGACAA
AUBES3924	GCCAAGGACCACTCAGAAAG	TCCATTGGTTGAGTTCCAGA
AUBES3923	TGTCAGCAAAGCCAGATGTC	TATGGGGTGGGGTGTAGAGA
AUBES3920	TCACGTTCCCCTACATCTCA	GATGGTGGACAACAACAACAA
AUBES3919	GTACACCCTGAAGGGCTTTG	CAGAATTCAGAAAGGCTGTGC
AUBES3918	CAGAGCAGAACACAAGGGTTT	AGGAGTAGTGGGGCTTTCCT
AUBES3916	TCATCATGTGCTTGCTTCCT	CACACCGGTTCTTTCAGGAT
AUBES3915	TGACCCTCTACTTCCCTCCTC	TGAAGACGGACACTGGAACA
AUBES3914	TGATCACTGCAAAAACTGTTCC	TGAAGGCTGAGTTGGTTTCC
AUBES3913	CAGGAGTGCTGGGTATGAGG	TCTCCCCGGGTTTTCTCTAT
AUBES3911	CACAACTCAGCAAGCACACT	GCTGTGTTGCACAGGCTTAT
AUBES3910	CCCTCTCTGAAACCCAGCTA	GAGCACAGCCTGAGAAAAGG
AUBES3909	TCTGCTACTTGCTACTGCTGCT	TTCCCTGAGAAGGAAACGAG
AUBES3905	CATCTTGTCCGGTTTTGAAGA	ACATCGGGAAGTGACAGTCC
AUBES3902	ATGGCATGAGAACATCAACG	GGAATCACGGGAAGACGTTA
AUBES3901	CAGATTGTGCCTGCTGTGTC	TGAGCTGAAGATATTCACAGGA
AUBES3900	AGCAGCAGCACAATGCATAA	TCCATAATCCCCCATTTCTTC
AUBES3899	CTGTGCAGCCCAACATGA	GGGACAGAGAGGCAGAGAGA
AUBES3895	TAAATGCAGGTGTGGACTCG	AAGCGACAAACTAGCAAGTGAA
AUBES3892	TGATAGAACTGGAACACACAAATG	CTCAAAAGCAGGATCCGAGA
AUBES3888	ACGCAGACAGAGCTTCCAGT	CCAGCCCTTAGCACATGTTT
AUBES3880	CAGCACTCTGCTCTCGTGAA	GCCCCCTCACCTCAATAAA
AUBES3879	GCGACTGAGGGGAATAATGA	ACACACACACACATGCTCGT
AUBES3878	CCATGGAGCTCTGGATCTGT	CCGTTTTAACATTGCAAGACA
AUBES3875	GGCCAGCGGTTTCTTATACA	CGTTCATTTTGCTGAACGAG
AUBES3873	ATGGCCAGCGGTTCATATAC	CGTTCATTTTGCTGAACGAG
AUBES3872	TCAGGCCAAGGTTACCAGTC	TCCAAACAGAGGAGGCAGTT
AUBES3871	ACATGCCGACAATTATTCCAG	GCTTATCACACGCGCTCTTT
AUBES3867	CTGTTACAGCTGCGAGATGC	TGCTGCCTACAAGTGACAAAA
AUBES3866	CCCCACAGTTGGTACCTTTG	TGGCTCTCAACGAGAACTTG
AUBES3861	CAGATTCAGTGTGATGGTGGA	GTACGGGGACAAATGCAATG
AUBES3858	AACAAAGCTGGCTGGGTATC	TGATGAGTGGGCCACATAAA
AUBES3855	CAGTTTGCCTGTTGCTTTCA	TTTTTGGATCCCCACTCAGA
AUBES3854	TACAACTCGCTCACGCACTC	AGTAAACGTGTCCCGGTTTG
AUBES3852	GCGAGAGGGAATAAATGCAG	GTTTGAGCAAAGCCTGATGG
AUBES3847	TACCTTGCATGCTGGCTTTC	ACTCCGCCTTCTGAGGATTT
AUBES3846	CATTGCCAGAACCTCACAGA	GCAATTGTGCATTGATCAGC
AUBES3845	CATTTCGATCCAGGGTGTTT	CAAATCTGTCGGGCTTGACT
AUBES3844	GGATAAGGACGTCTGCCAAC	GGTGCAAGGAAAATGACAGG
AUBES3839	CGGTTCTGTGGCTTCATTTT	CAACGAACGGCTCCATATCT
AUBES3837	GAGTGCACCCGGCTTTAGTA	TTGGCTCTTAATGCTCTGTCC
AUBES3835	GTTGGCATTGTACACGTTCG	CTTTTCACGGAGCCAGATGT
AUBES3833	AAAAACCCCCACAACAACAG	GTCCAGCTCAACTGCAGGAT
AUBES3831	GGTGGAGACTGAGAGGCAAG	CACCTGAGGCAAACACCTCT
AUBES3824	TTTTTGGAGTAGCTTCTTAGGATATGA	TTCCACCCAAATGAGACACA
AUBES3823	GCTCGATATGACTGACTGGATG	TTTCAGGAACAGCTGAAAAATG
AUBES3819	CCCACATTATGCCTTCACG	TAAACTCTGCAGCCTTCCAA
AUBES3818	TGTTTAAAGTTGAAGTGAATGGAG	CCCAAAGACTACGTGCAAGA
AUBES3817	GAGCAAAGGACAGACACACA	GCTTGAAAGTGTCAATGCAAA
AUBES3815	AGTTGTGGGTGGTGGTGAGT	TTGTGTCCCACCATTGTTTG
AUBES3814	TATTCAGCTCCCGAATCACC	TCAGTCTTCTGGCCTTCACA
AUBES3813	AGTTGTGGGTGGTGGTGAGT	TTGTGTCCCACCATTGTTTG
AUBES3812	GCCTGCTGAGGGATATTCAC	GGCAAATGGGAAGTGAGAAA
AUBES3809	CGAATAAGTAACATTTTACACGTATGG	TTGGTTGGTGAGTTTCTACCTG
AUBES3807	GCAAATGGGTTTTTATCAGCA	CCCAACCACAACAAGATCAA
AUBES3806	TGTGACCCTTTTAGAACGATG	AAAAACAAACCCAACAAGCA
AUBES3805	TTTTCTCCCACCTGCTGAAG	AGTGAGTGAGTGGGCTTCGT
AUBES3804	CCTGGGTTTAGACTGGAGGA	TAAATCTGCGCTCGGCTAAT
AUBES3802	TCTGCTACTTGCTACTGCTGCT	GCGTGACCGGTATGTGAAG
AUBES3801	CATCGCTCAAAAGCAGACAC	AACAGTATGAAACATGCTCCAATTA
AUBES3799	CAGGAACTTGTATTGCGGAAG	TGTTACCACCCCGGAAATAA
AUBES3798	ACCAAGCCAACAGAGCAAAT	TGATGTCGCGGTGATTATTG
AUBES3795	TGACCTCAACAATGTATGCTCA	TTCTGACATGCCGATCTTTT
AUBES3794	TTCAGGATGGAGGACTTTGC	TGTTGTGGATTCCCCAGAAG
AUBES3793	TTCAGGATGGAGGACTTTGC	TTGTGGATTCCCCAGAAGTT
AUBES3792	TAACTCCGCGTTCCTAAAGC	GATGCTGGTGGTAGAGAGTGC
AUBES3791	TGCATTGATTCACTGTGGTTT	ATCCACACACCGCCTGTAA
AUBES3789	TCCCCTGTGAGACAGAAAGG	GCCCAAAAGTGGATTATCAAA
AUBES3788	CAACAGAATAAACGGAATCATAAAGA	CACATGTTTGGACATGCAGA
AUBES3785	AACAGCTGTGAACTCTCTCTGTGT	AGAGCACGAGCGTGAGCA
AUBES3784	AGGTGTGAGGTGTGAACGTG	TCTGTCCATTCCCCAGAGAC
AUBES3783	CTCAGTCTTGCAGCATCAGG	TTTCTCTTCCTCCTACCCCTCT
AUBES3782	CCTTGAGCTCTGGAAAGGTG	TTTGTCACGTCAGCACCAGT
AUBES3781	CCCACATTATGCCTTCACG	TAAACTCTGCAGCCTTCCAA
AUBES3780	GCCTGCATAATGGATGGAAG	AACCCAGCTCATAAGCCAAG
AUBES3779	GAGTGTTGCTGGGGTAGCAC	GGTGGGCTGTGAAATTCAGT
AUBES3777	CCTGAAATTCCCAGGTAATGA	GCACCAACAACCATGCTACA
AUBES3775	CCACCACCATGTCCCTTTAG	TGTGAGATTGGAAACGGTTG
AUBES3774	TGATCATGGCAGCTTCTGAG	CTGTGCACAAATCATTCATGG
AUBES3773	AGCCAACAATTTCCATGAGG	TTCATGTCAGCGGTTCACTC
AUBES3772	GGGCACTAATGAGCACACAA	TGTTAAGCCTCAGCCTTTCAT
AUBES3771	TAGCATTCAAACGCCCTTGT	TTTGGGCTCAAACTATCTCCA
AUBES3770	TCCACTTTCTCTCCTCCCTTC	TGTAAACCAGCCATGTGAGC
AUBES3769	CCTTTATGGATCCGGTAAAACA	TCAGTCTCCCCACTCACCTC
AUBES3766	CGCTTGCCAGCCTAAATTAT	CACTCGAATAGCGAATAGTTGG
AUBES3764	AGCACTCTCAGTCACGCTTTC	GGGATGAACTTCAGGACAGG
AUBES3763	TGTGAGCGAGTTTGGAAATG	TGGTGTCGTGTGCTTCTGAT
AUBES3760	CAAGCAGCAAAGTCTGTGGA	CCACATGGACCTTGGAACAC
AUBES3759	AACCAGCGGAGTTTGTGTCT	CGATCGTCTGTCATCCATTG
AUBES3758	CCGAATCATTCTCGGATCAC	TTCGACTCTTTGAGCCGATT
AUBES3757	AGAAGCCATTAGACAGAGAAGCA	ACCTGTTTAACGGTGGAGGA
AUBES3756	TGGTGCAAGAGATCGAAGAC	GCCCTAACCACTGAGCTACC
AUBES3755	ACCTGGCAACATGTGAGCAT	ATCACCAAAACGCAAAAAGC
AUBES3752	ACACCCCTGCTCTGTCACAT	TGAAATTCCACAATCCCACA
AUBES3750	TGAATTCTTTGGCACCACAT	TCCTCACACAGTGGCATGAT
AUBES3749	TGGCAAAAGGTCTTGTTCTTC	TCTGCTGAACTCTCCGATGA
AUBES3747	AGAAGGGAGTGCAGAAGACG	CTCAGACCTGGAGGCCAGTA
AUBES3746	TTGCGGTTGTGAGTCAGTCT	TCTCTCGTCCTCATCCACCT
AUBES3745	ACACCCCTGCTCTGTCACAT	TGAAATTCCACAATCCCACA
AUBES3744	TGAGCCATGCTCTGGATACTT	TCAGAGCAACTCCTGAAGCA
AUBES3742	TGGTTTGTACCCATGCTTCA	GTGCTCCTGTCACTCACCTG
AUBES3741	TTTCAGCTCTTTGCTTGGGTA	GTGATAGTCGGGTGTCCACAT
AUBES3739	CAGCTCACTCGGTTCTGTCA	CAGCAACGCCTATCACACAG
AUBES3737	AGCTGCATGGGCTTTCATAA	CTTTTGGCTTCCACTCAAGC
AUBES3736	TTTCACAGCTTTCTCTGCTCA	ACCCCACTGTGAAATCCTGT
AUBES3734	GTTTCTTTCTCCCCGAGCTT	GGCTTTCAGAGTCGGAAGTG
AUBES3733	TAGCTGCTGGCACTTCACAG	GTGGCCAAGGTTGTCTCATC
AUBES3732	TCTCAAGCATGTGAGAAATCTG	AAGTAATCAATGCGGCCAGT
AUBES3731	ACGTGTGCTGAGGGAGAGAC	TTCTCACCAAATGCACCTACA
AUBES3729	GGAACCCCAAATTTCTCTCC	AGAGGGGAGCTGGTGTAGTG
AUBES3728	ACGGGGTCAGTCAGATCAGT	GGATGCAGGTGGTTACGAGT
AUBES3726	GCAGTAGATCGACAGGGAAAG	AAAAGTGCACCGTCCTGTAA
AUBES3723	TGCATTCATTGTTGTATCATTCTG	AATGTTTTGGGGAAGCACCT
AUBES3720	AAGCTCTCCTGGGCGTTTAC	GTGCTGCTGGTTTGTTTGTG
AUBES3719	ATGATCAAATCGGACCAACC	CTCAACTAATGCCTCTGTGTGTG
AUBES3718	GGACATTTGGTCCCATCAAG	CACGAGCTGATTTGCAAGAG
AUBES3717	AGCAGCAGCTCCAGAAAGAG	CTCACCGTTCTCTGCATCCT
AUBES3716	GAAATCCAGTCAGGGTCGTC	TGTTGAATGAGGCTGTCGTG
AUBES3714	GGAACCGGCTGAACATAAAC	TGGCACTGATTTGGCTAATG
AUBES3713	CCCAGAACCCCCACTAGAAC	GGAATGATCAAGTGCACCAC
AUBES3712	CCAAGGGACATTAACCCTGA	CCCAGATTTTCAGCCTTCCT
AUBES3711	GAAATCTTTGTATGCCTGGGTA	AGAGCAGGCCTCTCCTCTG
AUBES3708	CCCTTAATTCTGGCTGGTTG	CAATTCTCCGAACATGAGCA
AUBES3703	GGTTCCGAGGTTGAAGATTG	CATGCCCACAAGTTTCCTTT
AUBES3702	GCACATGACCAGAGCACATT	GAAGGTTTTTGCCAAACTGC
AUBES3701	AGGTGTGAGGTGTGAACGTG	TCTGTCCATTCCCCAGAGAC
AUBES3698	CATGATAGAACTGGAACACACAAA	CTCAAAAGCAGGATCCGAGA
AUBES3695	CTGTGCATGAGGCAGACATT	GGCTCCATCCATCCAGTTAT
AUBES3694	TTTGCATCATTTTGCAACTTC	ACAAGAGCTGGCAAACCATC
AUBES3693	TGCTTTGGTACTTCCCTTCAA	AGCCTGCAAGCAGAATTATTTA
AUBES3692	GAGGGCCGTTGGATTACTTT	CTTGCAAACGGTCCATAACA
AUBES3691	GGTGGCGTAACCAGATTTGA	TGACCTGATTTCTTCGGTGTT
AUBES3690	GTCCCCAGCAAGTGAAACAT	ACACATCCACGCCCTAGAGA
AUBES3689	ACCTTCTACCACAGGGAGCA	CAATGCGTATGAGGAATGGA
AUBES3688	CCCACCATTACAACACAGCA	ATCTGGCTCCCTCCTACCTC
AUBES3687	GCTGCCTGCCCAGTAAAGAT	GGTCAGAGGGTGTGACCTGT
AUBES3686	TGGCCAGGATGAATCAATTAC	CAATGTTCTGAAATGACCCAAA
AUBES3683	TGGATGACCTCCTCCTTCTC	GCGGCATTTTTCAACCTAAA
AUBES3681	TGAAAACACAAATGCATCCAA	AGGCAAACAAGGATGTAGCAC
AUBES3678	TGAATTTGCACTGATGGTTCA	TCCCCTCATTGTATAACCTCAA
AUBES3665	CACGCCCTGTCGTATATCCT	AACTGATGAGCACGGGTAGG
AUBES3664	GGATGGACGCACACAGATAA	AAGGGCGTGTGTAAAGTTCG
AUBES3660	TACTAAGGAGCCCTGCGATG	CATGAATGTGTGGTTCTGTGG
AUBES3657	CTCCACAGGAAAGCCTTTGT	ATGCCGTGTAACTCCCACA
AUBES3653	GCACCTCCTGGTGACGATA	CCGAAGGCCTTACAGAACTC
AUBES3649	CCAGCAAATGTCAGGGGTTA	CTGTGAATGGGCTGTTGCTA
AUBES3648	ATCAGATTGGCGAGGTGAAC	CAATTCGACCCCTGTAAAGC
AUBES3647	TCTTGAGCATTTCCCAGGAT	CGACACACATGGCATACACA
AUBES3646	TGTAACGGCAACGGTTTGTA	GCTATGGTTAACGAGCTGGA
AUBES3645	CCAACATGAAAACCTGTACCA	GGCATAAAGGCTGGATTTACC
AUBES3644	CAGCTACTGCTTTGCTGCTG	TTCGGCACGCTATACGAAG
AUBES3643	CCTTGAGCTCAGGAAAAGCA	TTGGGATAGATTGACTGCTTGA
AUBES3642	CATTGATGAAGTCAAGATAGCTAGAGA	AAGGGACAATTGATGCTGGA
AUBES3640	GTGCCACACATTGAGGAAAG	AATGCATGCAATGTCCAAGA
AUBES3639	CAGCTCAAGGGTTGTCATCA	ACGGTGACAGGAAAGAGGTG
AUBES3638	CAGCTTGTTGCTTTCCCTTC	GCGGCTGTATCATTTCAGAG
AUBES3637	CACCTGAGAGATCATGAAAACA	ACACCGGAACTGTCACTGGT
AUBES3633	GTCGGGTTCCTCTCAAGGTT	TTGCAAACACAACACAGTGC
AUBES3632	CGTGGTGGTTGAGCAGATTT	ATCGAGACGATCTTGCCACT
AUBES3631	CCATTGGGATAACGTGGTCT	GAGATAGCCGGTGGCACTT
AUBES3630	CCTGAGTTTTGGGTGCAAAG	AACAAAAGCCCCTCACACAC
AUBES3629	CCAGGCCACCTCAATATGAT	AAGGAACTTACACAAACAACTTTGC
AUBES3628	AGCCAATGTTTCTGGACTCG	CTGGAAACAGACTCCACACTGA
AUBES3627	AGTCTGGTGAACGGGTTTGA	CAACACCTACCATTAGCCACCT
AUBES3626	ATGCATGCAATTTACCCACA	CCCTAAGGCTCCAATAAGTGC
AUBES3625	CAGAGCTACGAGCAGAGCAT	CCGTACTGGAGCGGAGTAAG
AUBES3624	CCGATACCAGTCACAGAACCA	CCTCACTCTTTCTCGGTGCT
AUBES3623	CCGATACCAGTCACAGAACCA	CCTCACTCTTTCTCGGTGCT
AUBES3622	GGTGCTTTTTGTGCATCCAT	TCAGGCACCATCAGACAAAG
AUBES3621	AGCATGTCACACCCTGCATA	GATGGCTACCGGATTCAACA
AUBES3620	GGAGGGGAAATGACATCATACT	CCACAAAGTTTTGGCACAGA
AUBES3619	GGACGACGTCTCCTTCAGAT	CTGTCAACCAGTGGAGTCAGA
AUBES3618	CCACTGTTGTGCCAAAGAGA	TTGAGACCATCCAAGAATGC
AUBES3617	CCACTGTTGTGCCAAAGAGA	CCATCCTGGGTGATTCTTACA
AUBES3616	GGTGGCAGCTGGTTAATATTGT	AGCCTTGCTCTTTAGCATCG
AUBES3615	TGGTGATGAACATGAAACAGAAG	TTTTGGCCATAATCATGCAG
AUBES3614	GGTCGCTAATACCCTCATCG	CTGGAAAATCACGAATTGGA
AUBES3613	ACGGCAAAAGGAAACTGATG	GCCAGCTAACGCATTCTCAC
AUBES3612	GAGGATGCCTTGTCCTAACAT	TGGCATTTTGCTGCTGAATA
AUBES3609	GCCTAGACGCCGAAGAATTT	AAGTCCAACCTAGATACAATAGGC
AUBES3608	TCTGCAAATCCAGTTCACCA	AACCTTTTCTGGCTCTGGAA
AUBES3607	CATGCGACCCTTTGTAGGAT	TCAGCCAAAGGAAAATGTCA
AUBES3601	GGTTGGATTCTCTGCTGGAC	TTGCAAGGACCTGATTTATCG
AUBES3600	GGTCTCGCTCCCAAATGTAA	TGGAAGATTTTAAGGCAGTGG
AUBES3598	AGCACAAAACTGTGCAGGTG	TCGGATTCTCCAGTAACTCCA
AUBES3596	CTTGCAGTTTTGCAGCAATC	GCTACAGCCTGCACCATTCT
AUBES3595	AACACCCGACTCTCCATCAG	GCACTGGGCTACCTACTTGC
AUBES3594	CCACCAATAGGGCAAGTCTG	CTCCGAATCTGGTGACGATT
AUBES3593	TGACGTGTGGTTGCTTAAAGA	GACCGATGTTCCTTCACCAT
AUBES3592	CACGCCCTTTCACAGTACAA	CTGCCACCCATCCTTCTATC
AUBES3591	CAAATCTGGGCCAAATGAAG	GAGGAGTTGCCTCAGGAAGA
AUBES3590	CGCTTTGTACATGCAGTGTTG	CATCCTGATTAGGGCTGTGG
AUBES3589	TGCTTCCCATACCAGTGTGA	ATGCCAATGAAAGGTCCTCA
AUBES3587	CGCCAATCATTCTGGAGTTT	CACTTGGCAGCATCAAGAAA
AUBES3586	TGCGCTCAAGAGTTGCACTA	TGGAGATGCATTGAGGAGAA
AUBES3585	TGGGGAGAAACACCAAGAAT	CACTCCCGGTCAAAAGTTTA
AUBES3584	ACACCAGTCTGCTCCTCCAG	CACTGCAGGCATTCTTCTCA
AUBES3583	CATGCTCAAGCAATTTTTGG	TCATTTCAATCTTCTGCTTTCTG
AUBES3581	CTGGACAGTTGAAGCATGGA	GTCGATGAAGGAGGGAAACA
AUBES3580	GCACTGGGCTTCTAGTGGAC	GTGGCTTGAAAGTGGGAACT
AUBES3579	GGGCAGGCCTAATTTCTGTC	AGGAGACTTCGTCCGGAAAT
AUBES3577	TTGTCTCAGCCAAGAACAGG	GGGACCAGGGTAAAGCAGTT
AUBES3576	CCACCATCCCGTACAGTTTC	TGTCGCATTTGGATAAGACG
AUBES3574	TGTTTGTCCCGGTACTATGTTG	CCTTCATGAACCATGATCTGC
AUBES3573	GACACCCAGTCAGTTGTGGA	CAGTGTTTGGTAGGGTTGCAT
AUBES3572	GCCTCACTGGGTAACTTGCT	CAGTTGACATTTTGCTGACG
AUBES3571	GCCTCACTGGGTAACTTGCT	CAGTTGACATTTTGCTGACG
AUBES3569	GATCATTTTCCGGAAGGACA	GGGAGCATGTCACCAATCAT
AUBES3568	ACTTCAGCCATTGAGGAGGA	CCATCTCACATGTTGCTTCC
AUBES3567	ACTTCAGCCATTGAGGAGGA	CCATCTCACATGTTGCTTCC
AUBES3566	CCGAAAGTGGACCTTTCAAC	CAAATATGGAAAGGAGGCTGT
AUBES3565	CCCATGATTGGCTAATGTCTCT	CGGGACTCCATGAGCACTA
AUBES3564	CTTCACGTCCAGCAGAGACA	GCTGGGTATTGGATCTGAGC
AUBES3563	CGTTCCGTTATCATCGTGTG	CATGCAATGCAGGTTTGAGT
AUBES3562	AGCTTGTGGTGGCCTAACAG	ATCATCCCAGACCCAAAGGT
AUBES3560	TAACGCACAGCTAGGCACAC	GCTGTGGGCTCGTAATTAAA
AUBES3557	CAGTGGCATCACGCATTACT	TTGTGGTGGAATAGGGCTAGA
AUBES3556	GTGGGTCATTTAGGCAAAACA	TGCTAAATACGGGCTCTGCT
AUBES3555	CATGGGTTCATAATTATTGGTTCA	TGTGCTTTCACACACACTCG
AUBES3554	GGTCTGTTTTTACTCTCGCTGAA	TCTTCCTAAACCTCCTTCCTG
AUBES3553	TGCCTCTATTTGCCTGTTTC	TGTATAAAGTGCCTTGAGAAGCTG
AUBES3552	CCCTGCTGATAGGGATTTTG	TGAGATTGGATGCAGGTGTG
AUBES3551	GCACATGTGACTCTGATCGT	GCTGGTTTCCTGAAGGTTTG
AUBES3550	CTGCATGAGATTTAAAGGGGTTA	CTGGAACGCTTCATTTCCTC
AUBES3549	TATGTGCAAGCAGCCTTCAG	CCATGAACCCATGAACTTCC
AUBES3547	CGGACATGGTACTGGTGATG	GCAGTGAGAGGGAGACCATT
AUBES3546	CCACTGCATGGTCAAGTTTT	CATGGACAGCTCATTGCCTA
AUBES3545	CTGCGTCACATTTTCAGCAC	CTGACACCTGCCATCAAAAA
AUBES3544	GGGAAATATCACAGCCAGGA	AACGTTCATCCCATGTCTCC
AUBES3542	CTTCTGAGCCCATGTCACCT	GCCTGTCTCTCTTCAAAAGCA
AUBES3541	TGCAGACAGGGAGGAGAAAT	CCTCGTCCTGCAAAGTATCC
AUBES3539	GCAGTCAGCATAAAGTGCCATA	CCAAACTTCAGCAGGTTTTGT
AUBES3538	CAATTGGGCGTTTTATTTGG	ATGAAGCGTTGGATGGATTC
AUBES3536	CATTCCCTTGCTCCTTCATC	TTGAAATGGATTTCCCATAGC
AUBES3535	CTTGAAGTCAGACAGTACTCATGG	CGGCCATGTTTCTGAAGATT
AUBES3534	CAAGAGGCAGGGCTGAACTA	TTCAATGTTTCGGGTGTGTG
AUBES3533	ATCATCTGCCTGAGGGTGAA	GTGCTGCTGAAGTGGACTGA
AUBES3527	CACGCCCTGTCGTATATCCT	AACTGATGAGCACGGGTAGG
AUBES3523	GAGAGAAATAAGGCAGTCAAAAGC	TGATTGTTTACACACTGTTGGTG
AUBES3520	AAGCATGAGAAAGGCTTAGGG	TGCATTTCTTCCTCCATGTT
AUBES3519	GAGTGAATGTCCTCAGGGACT	TCAACAGGGGTCATTTAGCC
AUBES3518	GCAAATCCTGAGGAGGATCA	AAAGGAGGGCTGTGAGTGAC
AUBES3516	TCAGGGATTGTAACAGCCAGT	TTATGGAACGCCCACTAAGC
AUBES3514	TGGCCAGGCATAGTGAAGTA	GCTTCTGCATGCAATCATGT
AUBES3513	GCCTATTTAGATTGGCCTTGG	CAGAGGTTCAGCTCAGCAGT
AUBES3507	TGGCTTGAAAAAGCCAACAT	CAGCCCGAAGGACTGTTTAG
AUBES3506	TCTTCCCTGTTTGAGGCACT	CCAGGAAACAAAAACGATGG
AUBES3505	CAGACATGAATGTGGACTGACA	CACATGGATGAAGGAAGCTG
AUBES3503	ACCAGGAGCTTGTTGACTGG	TTCGTTCAGGAATCCAAACA
AUBES3502	CTTGACCCTGATTGGGTTACA	CCCCTCTTTATGGGAAGCTC
AUBES3501	CATTCATCAATGCAGCCAGT	TGTCATTGTTGCTGCCATTT
AUBES3500	GCACGCACACATACAAACCT	TGGGATTCTGGGAGCATTTA
AUBES3499	ACACACAGCCCACCTCTTTC	GTTATGCAAATTGGCCCTGA
AUBES3497	AGGGTGTGAACGACTGTGTTT	GAATTCATCGAGGTGCCAAT
AUBES3496	CGTCTCCGAGAAACACCGTA	CCATTAGGTGGCGGTAACAC
AUBES3494	GGGCACTGTATGTGCATGTT	AGTGAAGGGTGTGGGACACT
AUBES3493	TGGGTTTATGGCTGAAGACAC	CTGCTCATGGTGCCGTTAAT
AUBES3491	CACCTGAAGGATGAGCGAAC	TGTCACAGTAAGCCTCCGGTA
AUBES3489	TGCTCTGTGTTACGTGTTTTCA	GACTTCAGGCTCTGGAATGG
AUBES3488	CTGAGGATGGTGGTTTTTGC	AAGTGGCGGTGGATATGGT
AUBES3487	TCTCCCTCTTGGACATCTGC	GCAGTCCAAGGACAAACCAT
AUBES3486	AGGCTTCGTGCAGACACAC	TGGTGCCGGAGAACTTTAAC
AUBES3485	GCACCTGGAGTGAACTGAATG	TTTCCATTGCATCTGTTCGT
AUBES3484	AACAGCATGGGTGATCATAGG	GCACAGGTGCCTGTCAGTAA
AUBES3481	AGACACCGTCGTATCGCATT	GACTCTCCACAGGCATCACC
AUBES3480	TCCACTCCAGCATGTTTCAT	GCCGTGTATTGGTGGAATGT
AUBES3478	GGTCTGTTTTTACTCTCGCTGA	TGTCACCCAAGTCCATTAACA
AUBES3476	CCAGTGCCAGTGCTTTGTAA	TCCTTCACCAGCCTTTCTTG
AUBES3475	AGTCTCCAGTGCCAGTGCTT	CCTTCACCAGCCTTTCTTGT
AUBES3474	GCGCTGAACAGAACTGGATT	CCCAAGAACCACTGAGGAAA
AUBES3473	GGCCCTGTTTCAAAGATGAT	GGGGGTGAGCAATACGACTA
AUBES3471	TCCCCGTGAAGTCTGTGATA	GCAAGCTTGGCTTGTTGATT
AUBES3470	GCACGCTCATGTGAAAACAC	TCACACTGTCCGACGTGACT
AUBES3469	TGGTCGGAAGGTGTTCCTAT	CGACGCAGCATTCTGTAAAA
AUBES3468	TCCCAACATTCCGTAGTAGACC	CAAATTGTGTGAGGGAGAACAA
AUBES3467	TACACAGTTGGGTGTAAGTAAGGTA	GCCCAAAGTTCAGGGTTTCT
AUBES3466	GCTCTGTTAATGACCCGTGAA	ATGACTGCCGCTCACTGTAA
AUBES3465	AAGCTGAAGAGTGCAAATGAGA	TCCTTGAGCTTGTGGAAAGG
AUBES3464	GCGCCTAATGTTGATATTCGT	CAGTAGGCGAAATGCATGTAA
AUBES3463	CGTAGATTGCTGTTGCGACT	GGTCGCGTGCACACTATTT
AUBES3462	TAGCAGGAAATTAGCGGTCA	CACTTGCACAAATGCTTCCT
AUBES3458	TGGTGTCCCAGATAGGGTGT	CTTAAACCCCTGGACCCACT
AUBES3457	TGAACACCAGGACAACATGAA	GGTAACCACTACGCCACCAT
AUBES3456	GGATTCCTCTGCATTTCTGC	GTGAAGTATCAACCTAATCATTGACA
AUBES3454	GAACAGCTTTCGCTCATTCA	CGTGAAAAATTGCCGGTATC
AUBES3452	TGGTAAGCCTCTGTTGAGTGA	GGTGTAGGCAGTTCCAGCTT
AUBES3451	GCATAAAGGAACAGAAAATTACCC	TCTGTTGAATACAGCACCAGAA
AUBES3449	GCGAATAAAGCACTGTTTCCA	CCATAAGACGACACGCACAT
AUBES3448	GCTGCTGAGAGTGGTGGTAA	AAAAATGTGAGGGGTGTACTCA
AUBES3446	GCACACTCCTACCAGCCCTA	GTAATGCAACGCAATGTTCG
AUBES3445	CCTGGAATACTGGGCTCAAA	CGATAAGCAAATGACAGTACAACA
AUBES3444	TGGAAGCGGTAACGAAACTT	CGTGAACTGAGGAGTGGCTA
AUBES3443	CAACCTGCAGCACAAACATT	AACAGGCAGCTGCATTCAT
AUBES3440	GGAATGAAAACGCTCAAACG	GATGCTCGGCTTGGATAGAG
AUBES3439	GCTGAAATGCGTCACATGAT	GGGTTAGGGCTGCTTGATTA
AUBES3437	TCACCCATTAACCAGCACAA	CTTCCAGAGTCGGTTCCACA
AUBES3436	GCGAGGGCAAGGAGTATCT	TGATGCACCAGAGAACCAGA
AUBES3435	ACATCCCCCTGGCTCTTAAT	TGGGAATTGGAGTAGAACAGG
AUBES3434	AGCCGCAGTGTATCCAGACT	CTGCTTCATCGCTCTGTCAA
AUBES3433	GTGGGGGAGAAAATCCATTC	ACAAGCACACATTCCCTCGT
AUBES3432	TCTGTCTCAAATGCTCGGTCT	GTGCCAAATGTTCAAAGCAA
AUBES3431	GGCCGTTGACGTTACCTTTA	GTCCCAACCTGTGAGCTGTT
AUBES3430	GAGGACGCTGATGGAGTCAT	CCGGAAATTGGATTCTGGAT
AUBES3426	TCACCCTGACATTACCTGGTT	CATCATGCTTCTGCAACTTCA
AUBES3425	CAGCTTTCCCGAAACGTAAA	GTGCATTGAGAAAGGCACAG
AUBES3424	TACAAAATGGTGCCCACAGA	CGAGCTACAAATTGGGGTGA
AUBES3423	TCGCACTCTCATAAGGACCA	CACTCAGCCCCAGTCCTAAC
AUBES3421	TTCTTCATGCCTTGCTCTAAG	GGGCATGCCTTGGTTATATG
AUBES3420	GCGCTTAAAAGCAAATAGATTG	GGGCATGCCTTGGTTATATG
AUBES3419	GATGGCTTGGTTTCAGTGCT	CTGTGGGACAAGTGAGCAAG
AUBES3416	CTGCAGGTTGCTGAGACTGT	AGGTGCGCATAGACACACTG
AUBES3415	ACGTGGGCCTCTGTAATCAG	GTCTTGCATGCTCAGCTGTC
AUBES3414	TTGACCCAGGACCTCAGTG	CTGCTTAAGAGCGAGGAAGC
AUBES3412	TTATTCCAAAAGGCCTGGTC	CAGTTGATTGCTGATGCCTTC
AUBES3409	CACCTGAGGTCAAATCACCA	GTGCGTTTGGGCTATAAAGTG
AUBES3408	CAGAAATATGCGTGCAAACC	GCGCCCTAAATATGGGAGAT
AUBES3407	GCCTCAAAGCCTTCTGTTTG	GATTGTGCTCCAGTCATCCA
AUBES3406	GCTCTGGATAATGAGGGTGTG	GGTCGAGCAGAACAACGTCT
AUBES3405	CACCCTAATGGCATCGATTT	TGTGCAGACAGGTGGGAATA
AUBES3404	AACGCTGCAATGTGGATTTT	CGGTGTTCTTTATGTCCACCA
AUBES3403	GCCGTTGGAGTCTTTGACAT	CCCTTTGCTTTCTCTCTCCA
AUBES3402	CTCGGTCAGCTGATGGGTAG	TTCTCCCAATCTGACGTGCT
AUBES3400	CTAGCAGCACAATTGGCATT	TTCCCTGTGACCCTGAAAAG
AUBES3399	TTGTCCCGACCTTACCATTC	ATGAGCAAGCGGTAATGGAG
AUBES3398	CACGGAATTCCAGCATTCTT	TGTAGTTTGAGGCCACAGCTT
AUBES3397	GAGGCCACTGCTTAGTGACG	CACGGAATTCCAGCATTCTT
AUBES3395	GCCAAAATGTCTTTGGAGGA	CTACGGTGACATTTGGGTCA
AUBES3394	GTGTTGACGCTGTAACACACA	AGCGAATTTATCTGGGGCTA
AUBES3393	GTCCCCACAGCACAGAGTTT	TGGATGTGTCGAATACTTCCTG
AUBES3392	GCCAAAGCCTTGAGCTACTG	TGCTACTGTTTACTGCTCTTTTGG
AUBES3391	TGTTTAAAGCCGGATGTCCT	CCTGTCCTGATGACAAACTGG
AUBES3390	CTGCCCCCATCATTAGACAT	GACAATTGAAATCATATGGTGGA
AUBES3384	CGAATTGCACCTACAGAGATGA	CGTGCACCTGAAACGTAATTT
AUBES3382	ATGTGGACACCTGACCATGA	GTAGTAGCAGGGCAGTTGCTG
AUBES3381	GACCCTGAGGACTTGGATTG	TCCCCAGTAATCCACACTCTG
AUBES3380	CTGACATGTTTCTGATGGATACAA	CGCATCTGCATTACACAAAC
AUBES3379	ACCCTTGTTCTGTGCAGGTC	CCTTGTGCAAACACAACAGC
AUBES3378	AACGTTTCAATGGGTGCTGT	GGTTGTGTGACAAAAACGACA
AUBES3376	CATGAGCTGCACACACTCG	TGTCAAACCCCAATACTGAGAG
AUBES3375	CGTGTGCTTTATTTGGCAGA	GGACCGAGTACCTGTTCCAG
AUBES3374	CCCCTTTTCCTTGCATTACC	TGAAGTGCTGCTTGAATGGT
AUBES3373	TCGTTCCTCTCCTCCATCTG	CAGATCAGATTCCCCGTCTC
AUBES3372	GATTAAACTAATGGATGGAGAATCG	GCGAAGTCATTCAGCGTTAG
AUBES3368	CACATGGGTGTTGGATCACT	GCTGCTACTGAAAGTGCACAA
AUBES3366	GTTTCGGCAGACCAATAGGA	CCACCATTGCCGTCTAAAAC
AUBES3365	TCAAATGATGCCCAGGAAAT	GGCCTGCCAGAATCTACTGA
AUBES3364	AGGGTATCCCAAAGGTCTCC	CTGGGATAGGCTCCAGGTTC
AUBES3362	CAACCTCATGTGGGGTCAC	GAGAGCGTGTTGGACTTGGT
AUBES3361	TGATCCGGGGTTGTGTATATC	ACCCTTTCCATGCAAGTGAC
AUBES3360	GCAGACGTATTGCGTCATTT	GGCAGTAGATTGGCAGGAAA
AUBES3359	AGAAGGGCAATTTGTGCAAT	CAGCAGACCTGTTTGGAGGT
AUBES3357	TGGCTGAGGAGCTAGAGCAT	GAAGTCCCATCACCAGCAAT
AUBES3355	GGATGTGTAAAGCCCCAGTG	ACTGGTGCTCCCAACTTCAA
AUBES3354	ATCGCCCCAACTTTCGTTTA	CTCACTCTCGCCACGTGATA
AUBES3353	GCCAGGATATCTCGCTTACA	GTGCTTCAGCTGCTTCAAGA
AUBES3352	GGGCTTTGATTGAATGCTGT	CAGGTGTGAAAATGCCTGAA
AUBES3350	GTACCGATGCCACCAAAAGT	GTGTGCGTTTAGGAATGCAG
AUBES3348	ACATGCCTTAACCTCCCACA	CGACCTGTCCTTTAGGCAAC
AUBES3347	CCATGGGATTGTGAAGTTGA	CTGCAAGGCCCTTAACACTC
AUBES3346	GACCATGGGATTGTGAAGTTG	GCCCTTCTGCAAGGTTCTTA
AUBES3345	CCGCACCTTAGTAGCAGTGT	TGGGCATTTTGATGAAACCT
AUBES3342	GCCATTTACCGAGAGTGGAG	ATTCCCGTACAGCAGAGCAC
AUBES3341	TGGAAGACCGATCTCCAGTT	GGCAACCTGAACAAACACAA
AUBES3340	CATGATTGAGGGGAACACTG	GGCTCTCGCTTGATCCTATG
AUBES3336	GGTTCCAGTTGTTCCACGTT	ACATGTTTGTGAAGTGCTGGA
AUBES3335	CAGAGCCTCCGAATGTTACC	GCTTTCTGTGAGGATGCATTT
AUBES3329	GACTGGGTGTAAACAGAATGACC	GCCATCAGCCATTCATGTAG
AUBES3328	AAGGAGTCTCCAGTGTCAGCA	TGAGGAACATCCAAGAGTTTCA
AUBES3327	GCCCGTAAAGGATTTGTTCA	ACGATCCCATCCACACTGAG
AUBES3326	GTTAGAGGCCAAGGCGAAAT	GGATTTGCATGTCCAAAATG
AUBES3324	TGCAAATTGCCCCAAGTAGT	CCCTGGGATAGGTTCCAGTT
AUBES3323	TGCCTACCTGCAGTATTTTCAA	CAGTTTGCAGGACAAGAACG
AUBES3322	GCAGGAGAAAGCATCCTGAG	ACCCCATGTTTGGGTAATGA
AUBES3321	TGCCACCCATGCATTTAATA	CAGTGTGCAGTGTACCTTGTGT
AUBES3320	AGACTGAGATACTAGCGGTGGA	TTCAGGATACCATGCCCAGT
AUBES3317	AACCCCTGAGCATTAGTCCA	TCTGGGTATCTGGACAGCAC
AUBES3316	TTCAACATTAAAGCCTACACCTG	TTCACCTCCGGAATATGGTT
AUBES3315	GCCCTTGGTCAGTTTATCCA	ACCAAAAGGTTTCTTTGAACTAACA
AUBES3314	TTTGGCCCAATAATTTTGCT	CGTTTCCACTTCCGCACTAT
AUBES3313	CCTTTACTGCATGGTGTTGC	CCTCCAAGCATGACCTTCAC
AUBES3312	ACAATACGATTGGGCTGCTT	CCCTGTAGCCATCAACTTGC
AUBES3311	CCTGTGGCTAGATAAACAGAGGT	GGGTTTCAGCAAGAACAACAG
AUBES3310	TGGGTGATTGAGTGGAGTGT	TTCCGAAGAGCTAAAAGGTTGT
AUBES3309	TTCCAAAGGATTGCAAGGAG	CAGGCTAACTGGGGACACTG
AUBES3307	CCGAGCAAAATTGTGTATGC	AGCAGGGGGAAGTTTCTTTC
AUBES3306	CAATCACACTGAGGAATGCAC	GATCGCAAAGGCTGAATCAT
AUBES3305	CACTCCAGGTGAGGGGATGT	TCATTCATCGCCAGATGGTA
AUBES3304	CAGTGGAAGCCCCATAATGT	CTTGCCAGAACAGCTGGATA
AUBES3303	TGTGCAGGTCACGCTCTATC	CTGCTCAGAGCGGAGTGAAT
AUBES3302	TACGGGGTCAACCTCTTCAT	ACGTTTGAGAACCCCTGGTC
AUBES3300	TCAAGCACCTATTAGTCTGCAA	TGGGTAATCTCATCGGACAT
AUBES3298	TCAAAAGCTGGGAGGTGAAC	TCTTGCAATTACGCTTGCAC
AUBES3297	TTTGATGTTTGTCCCGATCC	CAATTTCCCTTGTGGAATCA
AUBES3296	TTGCTTTTGTGAGCTCTGGA	AAGAGGCAACACGGAGTGAT
AUBES3295	CGGGATCAATTCAACACCTT	TTACTCTTTGGGCTGTGTGC
AUBES3292	ACAGGCAGCTGGAAATAAGC	GTTGTCATGTCTTGGCCAGT
AUBES3289	TTTTGCATTGCTGGTCAGAG	CGTCCAGTGTGAACAAGGTG
AUBES3288	GCGTGCATAAATGAACACAA	TACGCCTCAGTATGGCACAG
AUBES3284	AGGTGAAATTCGGCACAATC	TCCCTTTCTGCATTTTAGACC
AUBES3282	CCGTTTTTCTAAGAGGCTGCT	TCAAAGGTTATTGCGTTGCT
AUBES3281	ACGCTTCCTCCAAGTCATGT	CTTGGTGCGAGGGTTGTAAT
AUBES3280	CCCCACTGTAAGAACCATGA	ACGTAAGAGCTCTGGCCACT
AUBES3278	GCGATACCCATGATCAGCTC	AAAAGCAAACTAACAGGCAAAGA
AUBES3274	TCTGTTGCAGCAAATCCAAG	TGCAATTCCCTCATTTCAGAC
AUBES3270	GGGCATCAAATGCAAAAAGT	TTAAAACAGTTATTTGACATGAGTCAC
AUBES3265	TGTGCCCTATGATGGGTTG	ACCTTCTGCCCATTGTTCAC
AUBES3263	ACCTTCTACCACAGGGAGCA	ATGCGTATGAGGAATGGAATG
AUBES3260	ACCATCGCACCTAGCAGAAC	AGTTGGAGCCAGGTAAGTGC
AUBES3259	CGAATTCTGGATTGTCATGC	CATCGTGGTCGACATACTGG
AUBES3257	CCTCTTGCGTTCTGTGTCCT	TCCTCTTTTTCTAATAACTTCCTTTC
AUBES3256	TTCAGCTTCCACACAGCATC	TGTCACTATGCTGCCCATGT
AUBES3255	GGCCTTGCATTTGAGAATTT	GGCAAACACAAGTGAAGCTG
AUBES3254	AACGCATCCTCATGCAGTAA	TGACCTTGAAAATGCTGAAAAG
AUBES3253	GACCGTGGCAGGTATCAAAC	GCAGCTGTCTAGCGATACCC
AUBES3249	CGTGTCCAATCCAGTAACCA	TGCCCTGATTTGTGTGTGA
AUBES3248	TTGCTGTGATAAATGTGCGTAGT	CAAATGAGCAGGGAATAAAACA
AUBES3243	CAGAAAGCTGCTGCATCTCA	TTTGTCATGACCACTAAGGTGTG
AUBES3242	GTTCTCCCCGGCGATATTAG	AGTTGCACAACAGGACATGC
AUBES3238	CGTTGATTCCTTTCATTTGG	TGGCTGCCCTATGAAGTTAAA
AUBES3237	GTGCAGATCCACATAAGTCCA	GGATAAACCCGTGTTGTGGT
AUBES3234	GCGAGGAGCAGCTCATAAAA	CAAGGTCTCTCCTCAGTGGTG
AUBES3233	CTGCTTGAAAAGCAAGATGAAA	GACACCCATGATTGCGTCTA
AUBES3232	TGACTAGGCTAAAGGCTCAACA	TGACTGTTTCGCATCCTCAG
AUBES3231	CTTGAGCAAGGCCTTTAACC	TGGCTGTGATTGATGAGTGC
AUBES3230	GTGTCTGAAGGGCCAAAGAG	CGCTAATCAGTCTAAATGCTTTC
AUBES3229	ACCGCTCCTCCACAGACTAA	CCCAGTTCCTGTAGGTTTGC
AUBES3228	CCATTGTCCCTACATGAAAGC	ATGTGCTCTGAACAGACATGC
AUBES3227	AGGGGATTACACCTCCAAGC	TTGTTGGCAAGACCATACACA
AUBES3225	TGAACCTTGCTAACAAAACGAA	CTTAAGCTGTATTGCAAAAATAGGA
AUBES3224	TTGGTTTATCTGTGGGTAGGAAA	TTTCGCAAACTTTCAAGCAC
AUBES3222	CCGTTGAATTATTTCACTCACAA	TGACCGGAGCTTTATTTATGC
AUBES3221	CAGCTAACCTGCACAGACCA	CACAGCCAACAATGAGTGCT
AUBES3219	CACGGCAGACCTTAGCAATA	CAGAGCTGCTGCAACGTAGA
AUBES3218	TTCCCTAATGTGCCTGACATC	ACCCAACCCTGAAAGTGTGA
AUBES3217	CAGATCCTTCCCAGTCTCCA	CCAAAATGGGGAAATCACAA
AUBES3216	GTGAGGCGGAAATGCTACTT	AATGCCTTGACAGCATGTTC
AUBES3215	TGTGTAGCCAGAAATACAGATGC	GACAGCCAGGCACAGAGATA
AUBES3214	CCGCACCAAACTAACAGACA	TGAGTGGGCGCTATGATAAG
AUBES3213	GTCTACTGCCAATCCTTAAGAGC	GCTCCTGCATCGGTAAAGTC
AUBES3209	CATGAATGAGAGGGCATCAG	GATGCCAATCAAAGCAGGAT
AUBES3208	TCATGTCAACAAGCGGTCTG	TCAGACGCTGCATTTTTCTG
AUBES3206	CAACAGACTGTGCCGGAGT	ACGTGGTCGATAAGGCATTC
AUBES3204	GTTTCCTCCCACAGTCCAAA	GTGAAATCCTGGAGGGACTG
AUBES3203	GCTGGGTACTCTGGTTACACAA	AACAGCTTTAACCCCGATGA
AUBES3201	CCTCCAGGAGCTTGAGATTG	GGCCATAGCGATAAGAGCAC
AUBES3200	AGGGTCCATCATGCTTTCTC	GGGTAAAGTGCTATGCCTGTG
AUBES3199	CGCTGTATCTGAGCGATGAC	AGTTGGGGGACACCCTAGAC
AUBES3198	GATGTGGTTCCAACCTCGTTA	GGACTTGGCAGATGTGCTTT
AUBES3196	GCCTCTGGGTGAGCAAAATA	ATGGCCAAACAGAGACAGGT
AUBES3194	TCCTAACATGATTTCCACTGAGG	GTAACCAAGGGCTGGATGTG
AUBES3193	TTCATTGCAGACAGCTGAAAG	TGGGGAATATCACAAAGTTCCT
AUBES3192	GTACATCACCTGAGGGCACA	GGGAGCCAAGTGCATAAGAC
AUBES3191	CCCCATACAAGGTAAAGTGCT	CAGAGGCAGTCAGCTTTTCA
AUBES3190	CCCTTCCCTATGACCTCCTC	GGTTAAGAGGATTTGCATCCAT
AUBES3188	CAACAAATCTCGTGGGAACA	GTGTGAAAGCGCTCATCTGT
AUBES3187	TACCTTGTTGGCACAGCAGA	TTTGAATCGACTGTTGCTCAG
AUBES3184	TGGGAGTTAACCAGGGAAAG	GAGGTTTTTCTCCCCAGTTG
AUBES3183	GAAGCATTGTGGTGCATTGT	CCAGTGTTTTCCAGGGTCAT
AUBES3179	CACTAGATGCAGCACTGGTAAG	GGATGCCTGTTGCACTTCTA
AUBES3178	GTGACAGGAAATGCAGCAGA	CACTACTGTTTGTCGCCAGAAT
AUBES3176	TCACAGGGTTGCACTACAGC	ATTTTTGACCGGGGGTGTAT
AUBES3171	GGAAAAAGTGAAGCACTGTGAA	CCAGCTGTCTTCGGTCAAAT
AUBES3170	CCCATTGCCAGTATTGGTATC	CGGTGACCCTGTGTAGGATAA
AUBES3169	AACAGGTTAAATGCTGCTTATGA	TCGAATAAGACATGGCAGCTAA
AUBES3168	GACGCAGCGGAATAACTGA	CATTACGCTCCAGCCAGAGT
AUBES3167	AACGTTTCAATGGGTGCTGT	GGTTGTGTGACAAAAACGACA
AUBES3166	GTCTCGAGCAGGTGATAGCC	AGACGTCCTGTCTCGGAAAA
AUBES3163	GCACTACCCTCCAGTGCTTT	AGTACCTTGGGCAGCATCAG
AUBES3162	ACACTGCGTGCTGAACAGAG	TTGCCCACGTGACATTTAGT
AUBES3161	CCTTCATGGCTGAACAGGAC	GCAAAACATGTCCCACCATT
AUBES3160	TCATGTCATGGAGGGTTTTT	CTCCACTCAGACATGGGACA
AUBES3159	GTTGGAGAAAGACCGCACAT	ATGTGGGAGAGCCCACTAAA
AUBES3158	CGGTGATGGAAATGTACACG	CAGTACGGGGAAGTGTTTTGA
AUBES3157	TGAGGACTTCTGCATGGTTTC	AGGAAAACAGGGTGCTGTGA
AUBES3156	GCTCGATAAAAGGTTGACAAAG	CCCACTATGAAAACACACAATTT
AUBES3155	AAGGCTGGCTCAGAAAAGTG	CTACCAGCTTGCTCCTCTGC
AUBES3154	CGGACGTCACAGAACTCAAG	GCTTAGACGCGCAGAGTGAT
AUBES3153	CCCTGGCCATCTCAAAGTAA	CTGCTGTAATGTCGCAAAATG
AUBES3152	CAATGTGAGGAAGCCTGGTC	GTGTTTTTGGTTGCCCAGA
AUBES3151	GAGGATGCAGTGAGGACACC	TGTGCACCGAGTGTGTTGTA
AUBES3149	TGTGAACCTCTAGGATAAGAGTCA	CTTCAGGGGTTTCCTCCAGT
AUBES3147	CAAATCCAGAGAGGGGACAA	CCTTTCGTCTGAGGGTCACT
AUBES3144	TGGCTGAGGAGCTAGAGCAT	GAAGTCCCATCACCAGCAAT
AUBES3142	GTTTGGGTAGCTCCATGGTC	CCGGCCTAGATAAGATGTGC
AUBES3139	TCATGATCAGGGTTCATCACA	GTGTCCGCTTAGTGGGTTTC
AUBES3136	GCCCATGCCTAAGAGGATTA	CCACAGCCCTGTGTAGGATA
AUBES3133	GAATGCTTTTGACTAGGAGCTTG	TGGGCTTCTCATTGTGACTTT
AUBES3132	CCCATGCACGTGATATTGAT	TGGTCATGACTCACTGGACTG
AUBES3131	GCCTGAGGTTGCTTCAAAAG	GCTCTGTGCAATTTGTGTGC
AUBES3124	TTGAATGCCGTGAAAATGTC	GCAACTGGCCCATTATCCT
AUBES3118	CGGGGCAATTAGTTTTCACA	TTTGGATAAACCCGTGTTCTG
AUBES3117	TACACTGGCAGATGCCTTCA	TGTGTTTCTTGCATGACGTGT
AUBES3115	TAACCCAGCACTGCCTTTG	GCAAGATCTTCACATGAGAAACATAA
AUBES3112	CGCCGCAAATTTGGTTTAAT	TTACATCCAGCACGCACAAT
AUBES3111	CAGAAATACACCCTGGAGCTG	CCCATGGCTCAGCTTGTAA
AUBES3110	GTTTCTTTCTCCCCGAGCTT	GGCTTTCAGAGTCGGAAGTG
AUBES3109	TCACCTGCATCCAATTCAGA	TGGCACCCTTGGTAAATCA
AUBES3108	GCATGGGCTGCGTAGTTTA	ACCCGTGTTTTCCGATACAG
AUBES3105	GAGCTCTGGAAAGGCCCTA	AAAACGCTTGCAGACCAATC
AUBES3103	GTGTTCAGATGGTGGTCCAA	GTTTGAAGGCAACTGCACCT
AUBES3102	GGAAGTAACATGGACCCAGAGA	AGGAATCAAATCCCCAAACC
AUBES3101	GGGGGAAATTTCATTTGACTT	GCTTCAGTGCTGTGCAGTTT
AUBES3100	CCTGAAATCTTTCCTGTTTTTG	GCGGTCATGTTACCTTTGGT
AUBES3099	ACCTCGATGCACAAGGAAAT	TCACCAGGAGGGGATAGAAA
AUBES3097	AAGCATTGTGAGTCCCTAGCTC	TGCATTGCTCAACTCTAATACAC
AUBES3095	ACTGCTGCATGTTCTGGATG	TGACGCCTTCTGTTTTCTGA
AUBES3094	CAGGCGGACCTATTGTTTGT	TGGAAAAGGACATGCATCAG
AUBES3091	ACTCTGAGCCTGAGGGGAAA	TGGAAGAAATATGAGGATTCTGAC
AUBES3090	GAAATTGAAACGGCTCTTGC	GATGCTTTGCCATGCTTTAAC
AUBES3089	CCCAAAAAGGCTCTCTGTAGAA	AGTAGGAAAGCAACGCTGGA
AUBES3088	ACGGAGTTCGCATGTTCTCT	TGCTCACGATGGCAAGTTAG
AUBES3087	TTAATGGGACGGAGTGTGGT	GCCAAAACTGTCAGCCTTTC
AUBES3086	ACCCTGTGCAGGATAAGCAG	GCCAGCTTGTCTCACATCAA
AUBES3085	CAGCTTGGCAATTTATGAGG	ACTGCGGTGACACAAATGAA
AUBES3084	CTGGATGATGGTTGGCTGTA	AAGTGCGACCCAACTGTTTC
AUBES3082	TACACACAGCCTTCCCATCA	TGAACATCCAGCCCAGTTATC
AUBES3080	TCCTCTGGAAGGCTCTCAAC	TTCTGCTTGCACCAAATCAG
AUBES3079	CATCATGTTTGAAGGCAGGA	CATGCAAAAATGTGCAAAGA
AUBES3078	TTACACGCCATACAGCCTGA	GACTCTGAGCCACGGAAGTT
AUBES3076	GGAGCAATGCAAACGAAATC	CAGGCTGGGCTAAGTCTGTT
AUBES3074	GGAAGTTACCTGCAAAACACC	TGCTTTCAACAGTGTTTCCAAC
AUBES3073	GCAGCGTGACACGGTTTAT	CCCCTGCTACTTCACCATTC
AUBES3072	CGGGGTCAGTCAGATCAGTT	AGAGGATGCAGGTGGTTACG
AUBES3071	TTGTTGGGAAACACTTCAACAG	AGCCTATCCCAGGGGACTC
AUBES3070	GCACATCCCAGAACAACCT	ACTGTGCCCTGTAGTTTTGGA
AUBES3068	TTAAGTGCATGAGCCCACAC	TGTCCATCATGATTCCCAAA
AUBES3065	TGTTGAGGTGTCTAGGATGCTG	AAAAGGGCCTGGCTAATTGT
AUBES3062	GCAGTGTCTTGACAAATGGACT	TTGCACAAATTCTCACTTGGA
AUBES3060	CATCCAATCAGAGAGCAGCA	GCGGTCACAGTTGTGCTTAT
AUBES3059	TGGCAGATCTCAGGTAGCAA	AGCCACAGGTTTAGTCTCAAAT
AUBES3056	CATGAAAGCAGGAAAGTCAGG	CAAGCAAACATCAGGCTCTTC
AUBES3055	ACTGAACACCAGTCCGTTCC	CACACTTCCATCTGAAAGACACA
AUBES3054	AAATGGGAATTCGGTACGTG	GTGGTGTCGAATCAACATGG
AUBES3051	TTCACTGCTTTCCTCCAACC	GCCACATAACAGGACCAGTG
AUBES3050	GCTGCACATAATGCAACCTG	TGCTGAACAATCCTTTGCTG
AUBES3049	TTCCAGACTACTTTATCACCAGAA	ACACAGGCCTCGGGAGTAG
AUBES3048	AACAACAGAGTGTCTTCCCTCA	AGATTCAGGATTTTCCGTTCA
AUBES3047	GAGAAGATGGAGCCTGTTGC	GATTATCCTGAGCGCCACTG
AUBES3046	TTCAGGTGTTAGTGCATGACTGT	TAGGAGCCAGCATCCTTTTG
AUBES3042	ATTTGGGGGTATTGATGCAC	CTTTGTAGAATGCACAATGAAGG
AUBES3041	CAGGGTCAAGTGGATGGAAA	TCACATGGCTGAATTTGGTG
AUBES3040	CCCAACCTTGCCTTATGCT	AGGGGGTAGGGTTAGTGTGG
AUBES3038	GGAGCCTTCAACTGAAGAAAAC	TGTTGAGCTGTTTCAAGAAATG
AUBES3036	GGATAAGAGGGAAGAGATGAGC	TACGCAGCACAATGGACAAT
AUBES3035	GACACGGGGAGTTCTGAAAC	GTGCATTGTCTCATTCACAACA
AUBES3034	AACACAGCGCCTCAGATAGC	TAGCTGGGCATGGTGAAAAT
AUBES3033	TTGGTGCAGTGTGTTTCTTTG	CGAAAATCAGTGTCGCATTC
AUBES3032	TGGATCCAGAGCCTATTCCA	CTTGCCCATAAGGGTGAAGA
AUBES3031	TTCCGATCAGTAAACCAGCA	CACCCTGTCCAGGATGTACC
AUBES3030	ATCCCAGTCCCGATACACAC	TGGCATGAAACAGCTTATGG
AUBES3028	GGGAAATTCCTCAAGAAATCG	GTGGTGTGAGGGCTACATGA
AUBES3025	TGAGTGGGAAAAGTATGTGAACC	GCATCTGTCACATTGCGTGA
AUBES3023	AAACGGATTTCAAGCAAGAGA	GGGGAGGTGTAGTAGGAGGA
AUBES3022	CCTGGAGGTGTGAGGTGAAT	CCAATAGTGGAGGGCACTGT
AUBES3021	TGCAAGTGAGAAAACACCACA	CGCACATACACAGCGTTTCT
AUBES3017	TGTGTGGTTTCCCTCTCTCC	TGCCTTTTCAGGGTGTAAGC
AUBES3016	CCATGGCTCCTGGATTTAAG	CCAGCCAGCAAACATGAATA
AUBES3015	TTCTGTTGGTGGAAAGATCTGA	TGACCATAATCCAACTCTTCAAT
AUBES3014	CCCAAAAATCAGAAGGCAGA	GATGAGACCGTGGCTGAACT
AUBES3012	TCCCCTCTGTTTCCTGTCTG	TGACAGACCCATGCATTTAATC
AUBES3009	AATAAGTGCTCCCGGAGTGA	CAATCAAAAGCTCTGTAACTGAGAG
AUBES3007	TTAGCTGCTTCACCCTGGTC	ATGGGTTTCCCCTAGTGCTC
AUBES3004	ATTTTGTTGACACGCCCAGT	GGGTTTAGGCAGCAAAAGAC
AUBES3002	GGTTTGCCCACATTTTTGTT	GGGCATTTGTGCTTGTAGGT
AUBES3001	CAGGACCTAAACAGCCCTGA	AGCACAGCCTTGGTTTGAAG
AUBES2999	GTGACCGCAGTGAGTACAGC	CCCCGAGACCCAGTAAGAAT
AUBES2996	AAGCCGAGTTAAACCTGCAC	TTCGTGAGATTGCGTGTCAT
AUBES2995	CCCTCCTCTGCCCTTTTAAT	CCTCCCCCATACACACAAAC
AUBES2993	AGCATTCTTTGGATGGGTAA	GCTTCAGTTTGTCCCTCTGG
AUBES2990	TTGCGGTTGTGAGTCAGTCT	TCTCTCGTCCTCATCCACCT
AUBES2987	TTCTCGTCAGAAACCTTTGGA	TGTTTCTGAGATTGGCTCTGG
AUBES2984	CAATCTCTGCACAGCCACAT	GCTTGTTGGTTAGCTCATTCA
AUBES2982	TCACTGGCATTGTTTTCATCA	GCCACAGTACCCTCCACATC
AUBES2979	TTGTCAGGTGTCCACATGCT	GGCTTTCCAAAATGTTGATGA
AUBES2978	GATGCCAAACCCTGTAGAGC	GCGTTTGAGCATGTGTTTGT
AUBES2977	CTGTTCTTTTGCAGCAGCTC	AAGCACCATTAAGGCAGGTG
AUBES2975	CTCTGTCTTCCGGGTTTGG	CAAATTCTCCTTGGCTCCTG
AUBES2974	GGTGGGAATACACCCTGGA	TGCACATTCTCCTCTTGTGC
AUBES2968	GCATCGTGCTGTAATGTTCG	AAGTCGTGCCGGCTAGTTC
AUBES2962	GATTATTTCGAGCGCGTAGC	GCTCAGGGGATCATAAAGGA
AUBES2958	GTGTGAGGCGAACAACTAAGC	CGTCAAATCTGGGTACTGTCG
AUBES2955	ATCATTTCCAGAAGGCCAGA	TCGCCGTGTACAGTACCTGA
AUBES2954	CACACAGCGTTAAGCACACA	TGTGCAGAAAACTGTGCTGTC
AUBES2953	TGTGCCAACAGACCTCACTC	CTGGGCTCTTGGATTTGACT
AUBES2952	TCCAGTCGTGTTGACACAGG	ACACCCACACAATGCACATC
AUBES2951	TGCTACAGCTGTGAGGTCCA	GTTGGGGAATTGGGTGAGAG
AUBES2944	TGTAAGTGAGCACCGTGAGC	CGTGTTCTGGGTGAGTCTGA
AUBES2943	AGCTCCAGGGCTTCTGATG	TATGAGCCAAGCACTGCAAG
AUBES2942	CATGGAGGGCAAATGATAGG	ATGTGACCCTCATCCATCAC
AUBES2940	GTTCCTGCCAAATTTCCAAC	CTGGGCTATGAGGAACAAGG
AUBES2939	GCTGCCTGTTTGACCCTTAC	TCGGTCATTACCTTGGCTGT
AUBES2938	TGCCCTATAGCCAAACACAA	TTCCTGTGGACATTCAGCAA
AUBES2937	AGAAAAAGTCGCGTCTGTGC	TCTTCCCTGTGTTCCTGCTC
AUBES2936	TGTCCCTGATGTGAGAACCA	GTTTTGCCATGTCGCTGTC
AUBES2933	TGGCATGCAGATGCTTCTAT	TTGCATGCCTCTTGTTTACAT
AUBES2932	CAGTGGATTTTGTGGCAAGA	TGTCATGCTTTGTGGGTCTG
AUBES2930	TGGGGCATTTGTTCCTAAAG	GGTGTCACAAGGAGGGAGAA
AUBES2928	TCATTTGTGAACAACCATACTCC	CACACATTCAACCCCTCCTC
AUBES2927	TCCACAAAGGCTCTAAGCAC	CTGAAGCCCTGAACCAAAGT
AUBES2926	ATGGTGATGTGGTGGATACC	TTGGCCCAAGGTACAGACTC
AUBES2925	TGAGTGCATTTTGCAGTTGG	ATCACCAGGTAATGCCGAAG
AUBES2924	TCCTTCACTTGACAGCCTCT	TTCCCTACCGCAAATTCTTG
AUBES2923	ATCACGTTTGCTTGTCCAAA	CCACTGTTGCTGTGAGCTTG
AUBES2921	GGGACAGAGGACTTTTCTGCT	AAGTTACAACTAATTCTGGAGGTGAA
AUBES2919	CCAGTGAACACGTGGCAATA	AATGGAGGTTTCAGCCAGTG
AUBES2916	CACATCATGCAAAAGCCTTC	AGAAAAACGAGAACAGACAGTGG
AUBES2915	CTGACAAAATGCACACCATTC	CTTCAGCGAAAGCTCGTCTT
AUBES2910	AAAAGAAGCGCCAGACTCAC	TCAAAGGAAGGTCTCACAAGG
AUBES2909	TGCTGTCAGATTTCCCGTTA	GACCAGGAGAAGTGGGCTTA
AUBES2908	ATAAGGTGGCAGTGCTGGTC	GCGAGGAAATAGCAGAGGAA
AUBES2906	CTGAGGGAATCTCTGCAAGC	GCAGTGAAGCCGATGATACA
AUBES2905	GTCATGTGTGGCTCCCAAGT	GAGGGGGAAGAGGAAAACAT
AUBES2904	CACTGCTTATTGAAATCCATGC	TGGGAGTTAAGGCAACTGAGA
AUBES2903	TGTGCCCTATGATGGGTTG	ACCTTCTGCCCATTGTTCAC
AUBES2900	GGACTGGGTGTGTTGAAGGA	CCCCCAGTCTTCCTGATACC
AUBES2899	CATGTGCATACACACACTTTCTG	TGACACAGCAGCACAAGTAGG
AUBES2898	CCCATCCAGGGTTCTTGAAT	TGAATTACCTGAAGGTGGCATT
AUBES2897	CCCCTTTTGTGTGGGATTTA	CCGAAGGGCACTAATTAGGAT
AUBES2895	AACCGATTGGTCAAGGTTCA	TGGGAGTTCATCCAAATGGT
AUBES2893	CTGACCGGAGAACCCATATC	TATGAACATGCGTGGCTGAT
AUBES2891	GTGACCGCAGTGAGTACAGC	CCCCGAGACCCAGTAAGAAT
AUBES2889	ACAGTTTGTTCATGCGTCCA	GAAACCAAAGCGCAACAGAT
AUBES2888	GGGGAGAATTTGGAGAATCTG	CAGGTAACGGGATGGCAATA
AUBES2886	CGCTAAATTGCCCCTAGATG	CTCTTTGTTCCCATCTCAATCA
AUBES2885	GCTGTTAAACCATTGCCTGA	ACCCTGCCTGCTTAGTGAAC
AUBES2884	TCACTTTCCTATGGCCTTGTG	ATCCACTCTGTGGTCGGTTC
AUBES2883	GGCATCATGAGAAGCAGAGC	GCCAAACTCACCACACTGTCT
AUBES2882	GATGGAGGAAATGGTTGGTG	TGGTGTCACTGTTCTGTCAGG
AUBES2881	TGTTTGCCTTTTGAACCAGA	AAGGCAAATTGATGGATGGA
AUBES2877	TGAGATGGGTTGACATGTGG	GGAAACAAATGGGGTTATCTCA
AUBES2876	CATCAAGAATCCGCGACATA	TGGCTTTAAGACCTTTTGCAC
AUBES2875	CAGGATATAAACGGCCCTGA	TTTCCGAAGAGGGTATTCACA
AUBES2874	ATCACAATTTGGCCCTTGTC	AGCGATTCTGCTGAAACTGG
AUBES2873	ACACAAGCCGTAACATGCAG	TCCCAAACACCATAACAAGGA
AUBES2870	CAAGGTAACGTAGCCCTGTTTC	TAGGGCTTCTTGGGTGGACT
AUBES2869	GGAACTCTCTGTTCCCACTCA	TTAAGCCTTGGTGGTTCGTT
AUBES2864	TTCAATCCCCAGGAAGAAGA	GGACACAACAACTCGGATGA
AUBES2863	CCAGGATTGCACATTGTTGA	GCTCGAGTGCACACTGTCAT
AUBES2861	TGGGGAAGGTCTGTAGCATT	AGTGAGTATGCCCCAAGAGG
AUBES2859	TGGCAGTGATCCATTCACAT	AAATCCCGTGGTTTTGAGTG
AUBES2856	CACTGGTATAGAAAAATAGGCAGGT	CCAAGTGTTGCTCAACCTCA
AUBES2848	GGAAGGTTCTGTGCCGAGTA	GCCCCATCCTGATTTCTTCT
AUBES2847	TGGCAGATTTGTTTCCATCA	GGCATGGTCATATGGTGTTG
AUBES2844	CCCTATTCATGTGCGAGTCA	GCCATTTAAGAGCAGCGAAC
AUBES2839	TTCTGACCCTGAGCCATTCT	GGTGCACTCATCTCTGTTGC
AUBES2837	ACGGCATGTAACGAAGGTTT	CATTTGTATTTAAAGCAGCACATCA
AUBES2831	CCCTCATTGCTTGTTCTTCG	CCAGTTCCTCCTGGTGCTAC
AUBES2830	TGTGTATGCCTAGACAACATGG	TGCACTGTGAACAGGAGCTT
AUBES2829	CAGGGGCAGATATGGATGAG	GCGGCAATAAAAATCTGTCAA
AUBES2826	TGTGCAGGTCACGCTCTATC	TACTGCTCAGAGCGGAGTGA
AUBES2824	GAGCAGGTCGTTTGTGTCAA	TGCTCTTTCCAAGCCTTTGT
AUBES2822	CAAAGTCCAGGTCACTGTCAT	GGAACAGGCGAAAGATGTGT
AUBES2819	CCCTCTTCACTGCTGGTGTA	TGTCATGCATATACTACTGCTACAAGA
AUBES2817	TGACTTTGATCATCGCATGG	CTCACAATTTTATTTTGCACCA
AUBES2816	CCCTGGGAGACATGAAAGAC	ACAATGGCCTCTGGTGAGAC
AUBES2815	GCACGACTCAAAAAGCCACT	GCATCAGCCAAATGAACAAA
AUBES2814	AACTGACGGAAGCAATGTCC	CAGGTTCAAAATGAGAGGGAAC
AUBES2812	CGTGGGGGCACTATACAAAT	GCTAGACGAGCTCCGAGAGA
AUBES2811	ATGCGGCATTTCTCATGTCT	CCCACCATTCAGAAGCTGAT
AUBES2809	ATTTACCAACCGCCAGATTG	TTACTTCGTTTTCCCCCAGA
AUBES2808	TGAAGGGGTTTTGTGGTTTC	CCCGCTCTTTTACCATAGCA
AUBES2805	TCCCCACTGTAAGAACCATGA	TCTTCCGGGTTGGTGTTATG
AUBES2802	TTGGCATCCTTGGTAAATCTG	GCAAAGGGAGGTAGCATTGA
AUBES2801	TGCCACCCATGCATTTAATA	ACAGTGTGCAGTGTACCTTGTG
AUBES2799	GCGGTACTGTACTTCCATCCA	GATGACCTTCCATGCCTGTC
AUBES2798	AGACTGAGATACTAGCGGTGGA	TTCAGGATACCATGCCCAGT
AUBES2795	GCAGCGAGCGTTAAGAGAAT	CAGTACGCCATTGTTCTGCT
AUBES2792	ATACGATTGGGCTGCTTTTG	CCCTGTAGCCATCAACTTGC
AUBES2791	CCTGTGGCTAGATAAACAGAGGT	GGGTTTCAGCAAGAACAACAG
AUBES2789	CCAACTGACATGTTTTCAGGA	TGTTAGAGGTCAAAGATGGATGA
AUBES2788	ACTCCAGGTGAGGGGATGT	TCATTCATCGCCAGATGGTA
AUBES2786	CCAAGCACTGAAGGTGCATA	ACTGCCCTCTATCACTGTGC
AUBES2783	GCCATACTGCCCACCCTATC	ACATGGTGACGGTGATCTGA
AUBES2779	CCAAAAATTGCCAAAGCATC	TGTCCTACACTGGCACCTTG
AUBES2778	TGTGAGAGCGTAAGGCTGAA	TGAAAACTTTGCCTCATGGA
AUBES2775	GCCATTGGTTCTGCTAATGC	TAAAGGCAGCGAGCGTTAAG
AUBES2773	CCATGTCCCTACAATTGCTGT	ATCCATCCATCCATCCACTC
AUBES2772	GGAAGGCAGCGTCTAGAGAA	CCTTCTCTGAACCTCTGAACC
AUBES2770	CCAGAATTCACACACCATGC	CCAGCTTGAGCTGCTAGGAC
AUBES2769	CCCGTTCAGAGATGTTACGC	GCTGGAAAGATTCAATGTCCA
AUBES2767	AGGAGTAGGCGTCTCCAGTG	TTGACCATTGTTTCCAGCAA
AUBES2764	TGGGACAAGCAGATTGTGTG	GGATAACCGCATGAATGAGC
AUBES2761	GTGGCCAAGGTTGTCTCATC	TTTAGCTGCTGGCACTTCAC
AUBES2759	GGTTGAACCTGAAAAGATTGGA	CATGTAACACTGGCAGTTATGGA
AUBES2758	AAGGCATCAGGATGGATCAG	TCCCTGCTTGATTTAGCACA
AUBES2756	CCAATCTTCCATGCAAGTCA	GAACAGGGATGTGAGGGAGA
AUBES2755	TTAGGCCATAAGCATGCAGT	GGCTTGCACCTTCCAATAAG
AUBES2754	AATCAATGAAGGGCCTATCG	TTGGTGCACTAAGGGGAGAG
AUBES2753	TCAGCCTCCCTCATAACCAC	GCACACAGGGTTGAACTGAC
AUBES2752	GCCAGCACCCTTACAGACAT	CCTCTTTAGGCTCCAGCAGA
AUBES2751	TCACACCACAGAACTGACAGC	CAAGCATGCCTATGTTTGTAGG
AUBES2750	TTGACAAGGGAAATTCACACA	CTCATTTCCACAGTCTCACAGA
AUBES2749	CGTTCAGCAATAAAACGGAAT	CCAAACTCTGACTGAGAGGACA
AUBES2748	ACAGTTTTCCGCCATGGTAA	ACCACTGTTGGGCAGCTAAC
AUBES2746	GGGAGATTGTTGAAAGGGAAT	AGCACATTACTGCCCACCTC
AUBES2740	GGAGTGTGGGCAGTAGATCG	GAAAAGTGCACCGTCCTGTAA
AUBES2737	AACAAACATCCGACCTCTGC	TGGTACACTGAACTGATGGATGA
AUBES2736	CCTCGCTTTCTCTCGTTCTG	TTGACGGGGATTTTAGTTGC
AUBES2735	TGCATTCATGCAAAAAGCAC	CCATGGTTGGTTCTTGGTTC
AUBES2734	GGCGCGTATAAATCACCAGT	CCACTGCACCCATTAGAGTG
AUBES2732	GAACGCTACTGTGGAGCTCAT	AGTGACCAGGTGAAGGATGG
AUBES2731	GCCATGCTTTCATCTCTATCC	GGTGTCTGGCTTGCTTATGTC
AUBES2730	GAACAGCAGCGCATCAAATA	GGTGGACACCAGACACTGAC
AUBES2729	AGATGAGACAGGTAAGCAAGTACA	AGCTCAAAGCAGCTCCAGTC
AUBES2725	GACTTGCCCGAGTGTCAGTA	AAAGCGCAAATTGCTAAGGA
AUBES2724	TTAGACTCCGCAGCTTTGTG	ATGCAACATTCCCTGGATTC
AUBES2722	GGTGGCGACGTGATCTCTAC	CGCTGTCTTTTCTCCTGTGG
AUBES2721	TGTTCCCTGTCACTGGACTG	TTTCCCAAATATTCCCAGTTG
AUBES2720	TGTGAAAAGGATAACTGCATTG	CATAATGAGGAACTGGTCTGGA
AUBES2717	TGTGGTGAGAGGCATATGGA	CGCTCTCAAAGCAGAAGACA
AUBES2716	TGGTCATCTGTGGTGTCTGC	TTTTGCAGGTCCTCCTCATC
AUBES2712	CCCACGGACACACAAATAGA	GCAATGACTGTTTTGCACCA
AUBES2709	GCCCGACTATGGAAATAACG	TTAACTGCCAAGCCACCACT
AUBES2704	TTATGCTGTGTGTTTGCGTGT	CCCAGCATGAAATAAAAGACC
AUBES2703	GCAACTGAAGTTTGCCTGAA	GCAACAAAGAGAGTAAGGGTTAAG
AUBES2701	TGTTGGGTAAGGAGCCAGTT	TTGAAAACGCTGTTCCTGTG
AUBES2699	TGCACCACTGGACTATGGAG	CTGTAAGCTCACTGCCACCA
AUBES2698	ACGGAAGCTGATTCGCTTAG	GTCGGCGTTCAAAGTTCAAT
AUBES2696	TGGTTTGCATCTTGTGGTATG	GAAAGTGCTTTCACATATCATGC
AUBES2695	ATGGAGCGCTCATCCAGA	TCGGTGGGTCTGTTTGTATTC
AUBES2694	TTGCTGGAGCCTATTTGACA	AGTCATCCCCATGCTTTGAC
AUBES2693	AAGGCCTTGAATCATGTTGG	TCGATTTGACACCTCACCTG
AUBES2692	ATGCACCCGAGGTTTTAATG	ACCCCTTCATGACAACGGTA
AUBES2689	AGAAATCCAGCCACGGAATA	TGCCAGCTTTAAGCCTCTGT
AUBES2686	TCAGTGTTTATTTGTTCCAGAAAATC	CAACATCTGAAGGGTTTTCCA
AUBES2684	CGAAACAGCCAGCTACCCTA	CGTACTGTGTGTGCAGTGGA
AUBES2682	TGAAGCAGTATTCCCGACTTG	TTGCCTTATAAGCAGCAGAGG
AUBES2681	GTTGACGGTGATCGAAGACA	GGGGTGTAGACAGCCCTTTT
AUBES2679	CACGTCCCACATCTTTCACA	TGAATCAGTGGGCATTCAGA
AUBES2678	ATAAAGTTTCCGACCGCATC	TCTTCACGCTCTTCTCTTTGC
AUBES2677	CCCAAATTCAGAGAGCCTGT	TGTGGTCTTTCTGTAAGGTGTCC
AUBES2676	GCTGGAACGTTTCTGGCTAA	ATCGCTCGCTCTCTGTCTGT
AUBES2672	ACATTGCCGTATCCACACAG	AATGCCTGATGAGGTTGGAG
AUBES2670	TGACAGAACACAAGGCCAAG	CATAAAATGTCTTGGTGTCATCCGC
AUBES2668	CCTGCAGTGGAAAGGTGTCT	TGTGGCTGATGTCTCCTTTT
AUBES2664	GAATGGTGACCAGCTTCACA	GTCCTCATCTCTGGCCTTTG
AUBES2659	GTGTCAGTGCTTTGCAGCAG	GGAATGTGTGCAAAACAAGC
AUBES2658	AACAGGAGCAATTCTGCAATC	GCACAGCCTTCACTATGCTG
AUBES2656	GCCCTCTGGGAGTTTAAGGA	TGCATGCCAGGATAACAAGA
AUBES2655	GCTTGCTTGGTTATCATGTGC	AACAGGACGCAGCAAAATGT
AUBES2651	CAACCAGAGCAACGAGGTTT	TGGGTAAGCGTAGTGAGCTG
AUBES2650	CGTGTAAGTTGCGGGCTAGT	GGCAAGCAGAAATCTCCAAA
AUBES2645	CGAGACATTTTGTCCCAACA	TGCAAAGTGACACTGAATGCT
AUBES2642	AGCATCACGGAATTCAGCA	TCACAGGCTTCTCTCCGATA
AUBES2641	TTGGTGGCTGTTTGTTTGAG	GGGATCGTGTCTCTTCTACTGC
AUBES2639	AACCCTCACTAATGGCTAATGC	TAGCAGCAGTGGTTGAATGG
AUBES2638	CTGCTTGGACTGTGTTGCAT	GCACTCCAGCCAGCTTAGTC
AUBES2637	TGCACAGAGGCAAAATTACG	GACCAAAGGTTCCCACAAAG
AUBES2636	CAACGCGTGTATGCATTGTT	TGATAAATCCCACACGTTGC
AUBES2635	TAACGTTTCAATGGGTGCTG	GGTTGTGTGACAAAAACGACAC
AUBES2634	TCCTGAGCTGCTGTGAGTTG	TGGTGTCCAGGAAGTGTTCA
AUBES2632	GGAGCTCTGTGAAAAGCTGTG	GACTTGAATCGCTGGGTGAC
AUBES2629	GATTAAACTAATGGATGGAGAATCG	GCGAAGTCATTCAGCGTTAG
AUBES2627	CCATACCCAGATGTCTGCAA	ATTGGCCCTGGTTATGAATG
AUBES2625	CCAAAGCCGGTACCATAAAA	ACAGCTGTGACGTTGGACAC
AUBES2624	TTGGGGTTTTTACCAAATGAAG	TGTCTGTCCAGCTATCTATCTACCTA
AUBES2623	ACCTAGCGTGGATTCAGCAC	CTGCTTCCGTCCACTCCTT
AUBES2622	TGGTCGAGGTCATTTCTCATC	CAGTAGTTTTAGGCAGCACGTT
AUBES2621	TGTGGGTTTGAGGGGATTAC	TGAGATAGGCTCCAGGTTCC
AUBES2620	TTCACCCTGCCATGTGATTA	GGGTGGAGTCTTCCTTTAACC
AUBES2619	AATGCCCATTTGTCTTCACC	GCTTGTAAACCAAGCCATCC
AUBES2618	ATGCTTTGACAGATCGCTTG	AGATCTGGCAGTCCACAAGAA
AUBES2617	GGGTCACTAACTCAGGTGTGG	AGGTACAAAATGCCTTGACG
AUBES2616	ACAAGCCTCGTGGTATGCTC	GCATTGGAACCTTTGTTTCAG
AUBES2615	TCATGATGTTCAGTAAGTTCAAAGG	CATTTGTTGTGTGAGCAACATT
AUBES2613	ATTTCCCCACAAAGGCAAA	TAAAGGAAGCAGGGGGAAAT
AUBES2612	GTGTGAGATGTTGTTTCGTTGAG	GGGACAGCAGTCACACACAC
AUBES2611	GATGGGTGATGAGGGTATGC	GGGTTCCTAAAAATGAAGTGGA
AUBES2610	AACCAATAGACCAAACAAATCAG	GGCACCAATGCCAGTCTATC
AUBES2609	GCACATGACCAGAGCACATT	AGGTTTTTGCCAAACTGCAC
AUBES2608	AAGGTGACTGGATCTTCCACA	AGGTTTTGCACTGTGCTTTG
AUBES2607	AATGCCAAGGGTGTCAGAAT	TCGATTCCTCTCTGCTCACAT
AUBES2606	GATCTTTTTCGGTCTCCCATC	GTCTGCCAACAGGAGTGTCA
AUBES2605	CACATCTCATAGCCTCATACATGG	TGCATCTGCTTCAGGTGTTC
AUBES2604	TCATTGTCTTTAGACTTGCTTGTAATG	ATACCCCAGGGAAATTGGAC
AUBES2603	ACCCACTGCTGGGTTAAAGG	CAATGCATGTGCCGTTTTAT
AUBES2602	GCGCAATGACAGCTTAAACA	TTACACCTGGCGGCATATTT
AUBES2601	TTCCGAAGGAGTCTCCAGTG	GGTTGCAACAGCTACGAACA
AUBES2600	CATAAGTCAAACACCCTGTCCA	GGGCAATGAATTTCCACAAA
AUBES2599	AAGGGCCTTTGTCACATGAT	CACTCCAGTTTCTGGCCAAC
AUBES2597	CAGCAGCTCCAGAAAGAGGT	TCGGCATGCTGCTAAAAAC
AUBES2596	TTTCACCAGCCACTGTTCTG	AATTTCCTGTCACTCTTCTCTCTC
AUBES2595	CCGGGTCTCTCAGTCTCTCA	GTGCAGACATCTCCAACACC
AUBES2594	GCATAAATGTATGTGCCCTGTC	ACCATGGTGAGCAGAAAAGC
AUBES2593	AGGCTAAAATGGCTGGGTTT	CCTGGAAATGAGCTTCATCC
AUBES2592	GGAGCATAATCCCAGAGCAC	TGTTCACCTTTATACTTCCATCTTATT
AUBES2591	GACGCAGCTAAGTGCCAGAT	TGTGCTGGTTAGCCAAGGAT
AUBES2588	TGGTTAGTGTGAGGGGTTGC	AAACAACGTTGGTCCTGTCC
AUBES2583	ACCAGCTTAAGACAGCAGCA	AAGACCTTCTACACTACAGTGATCTTT
AUBES2582	GCATGGGAGGCATATCTCAG	CTGACCTTCCTGGCTGTTCT
AUBES2581	TGTGTAATGGGATTCTCATGC	CCTCGTGTGGCTAAATGTGA
AUBES2580	TGACATCAAAGATGCCCTCA	CAAGGCGTCAAAGAGGATTC
AUBES2579	CAGGTCCTGGGTGGAATGTA	CAAACAAGCCCAGAACCAGT
AUBES2578	TGGTATTCTCACAAGGCAGATG	CATACCAATTGCAGGTTCCA
AUBES2576	CATGGTCTGAGCCTGAAGGT	ATATTGCCCAGCCCTAATCC
AUBES2571	GACTGGTGATGGAAAAGCTG	GTGGAGATTCACCCCTTCTT
AUBES2570	CCATGCTGCAACATATCCAG	GCTCATGTTGGAGACGTGAA
AUBES2567	TGGCTGATCGGTGTAGAGC	TACTGGCAGTGATTGGCTGA
AUBES2566	TCCCATGTAATTGCACCATC	CAAAGCCAATGGAAAAGGAA
AUBES2565	GCCAAAGAGCCACTTCAACT	GCTCCTTGTGCTCTCCAGAC
AUBES2564	CCTGATTCAGAAGTGCTGACC	AGAGACGATGGTGCCACTTT
AUBES2563	TGGCAAACTTTTGTTTGAACC	CATCACGTGAACCAGCTCAT
AUBES2562	ATTAGTGGTCTGGGCGCTTT	GAACAGCAAAATGTCACCAAA
AUBES2561	TCGAGGTGTCCAACAGTGAG	ACAAGAAGTGATGCGCTCTG
AUBES2559	ACATTTCATGCAGGAGCAGTT	TAATTGCAGGGAATGGAAGG
AUBES2557	CGTGTTTGTGTAAATGCGTGT	ATTGCAACTGGGTGAATGTG
AUBES2555	ACTGTTGTTGCTGTTGTTGTTG	GCACAAACTGACAAACAGATTCA
AUBES2553	GGTTAGTGCTGAACGAAATGC	CGTCCAGAGAGAGGAATGGA
AUBES2551	GGTCCTAATGAACACGACGAA	CTTTGCCGCTAAGTCATGGT
AUBES2550	CACCTCCTTAAGGTGCATTGA	TGTAGACTTGGCCAGAAAGGA
AUBES2549	AATCCCGCATCTAACCGTAA	TTTACACATTTCTGATGGAAGGAA
AUBES2547	AGCCAGCAGAACAGCTTGAC	GCCTCTCCCTCTCCTCTCTC
AUBES2546	TTCATTGCAGGGTGCCTTAT	GTGGGTTTCCTCCAGGTTCT
AUBES2538	CCTCAGACTCGTGCTCCTCT	TCAAATTTCAAACGTTGACCA
AUBES2532	TCGGATTCCTCATCATCCAC	ACGGCCAAAGAAACAAACAA
AUBES2530	CAGAAACTCATGTGGCCTGA	GCCTTGCATAAGCTCCTGTC
AUBES2526	TGACATCCGTTTTGCTTTTG	TGTGTACATGCCCATGTGAGT
AUBES2525	GCCGTGCCTCTTCTTACTTT	ACACACCCGCAATCTTTTCT
AUBES2523	GAGAGCACACAGACACATGC	AGACTCCTGCCTAGCACCTG
AUBES2522	TGAGGATGTGATGGATTTGC	CCCAGCCTTAAAGCCTCAAT
AUBES2520	TTCTCAGCAAGATCCAAACAGA	TGGACATTGTCAAAAAGCAG
AUBES2513	TCCCTGATTAATGCCATTCG	GAGAATGCTTGCACATTCCA
AUBES2512	CTTTGGGGGAACGTCTCACT	TACAGCTCCGGTAGGCAATC
AUBES2511	TGTTGTCTTGTTGAAAGGGAGA	TGCGCACTTTTCTTACCATT
AUBES2510	ACGCATGACACACCAGTACA	CATTGCCGGTTTATCGATCT
AUBES2509	CAACTTTTTCGAATCGTTGTG	CGAGGTGTGAAGCAGAATCA
AUBES2508	ATTGCAAGGACTGTTGGACA	CACAGGTTGCAAAGTGACTGA
AUBES2505	TTCCAAACACACAAACTCACC	AAAGTGAGGGCGTGTCACTAA
AUBES2504	TATGAGCGTGTGGTGGGTTT	CACAATGAACTGCCCTTTTG
AUBES2501	GCCATGCGTTCACATGTATT	TGGTTCATGGCCTGTGTATG
AUBES2497	CACCTGACTACATGCACACG	CTCCATCATCCTTCCACAGA
AUBES2492	TGCGTTTTGCAACACAGTAAC	GTGCCACTTTTCAAGGGTTT
AUBES2491	CCGATCATCCTGATCTCCAG	GCGTTTAACCCTCAAACGAG
AUBES2490	AGTGCGCAGTCTGTGCTG	AAGACACACAGGAGGCCTTG
AUBES2488	TCCTGAAGGGAAATATTCCTGA	CCGAATGTAAATCGCATCAT
AUBES2484	GATGTTTTCGATTCCAACAGG	CATAAAGGCCGTATGGGAAA
AUBES2481	GCGATTCCATGTTGTCTTGG	CCTGCCAAACATGACACAAA
AUBES2479	TGTGGAAATGCCTGTTTCCT	CCATTGTCTCAAACGCTCCT
AUBES2478	CAGCCTGAGGAGACTTGTGA	GGGCACAGCAAAGATTGTATT
AUBES2477	TCATATGTGCATGGGATTTGTT	CCCATCACTCACACTCTCCA
AUBES2475	CACAGTCTTGGAGGGGAAAA	CCGTTAAGAGCCCTTTCAGA
AUBES2469	GACTTGTGCCATGGTTGTTG	TTGATGAGCCTGTTCCCACT
AUBES2467	GCAGATTCAAAACCCCAAAA	CAAGCTGTGCTGAAAGCAAC
AUBES2466	AGTGGTGTTGGGGGAACAAT	TCCCCATCCACCACATAACT
AUBES2463	ACTTTTCACCGTGTGGGAAT	GAGCACCATCCACTGACAAA
AUBES2459	CGAGCGTGAGGTTCTTTTTC	CGGCACTTCTATGATGAGCA
AUBES2457	CGCTCCGTCTTCACTTCTTC	GTTCCCTTAAGCCAACACCA
AUBES2456	CCAATCAGAGCAAGAAGCAA	GTGCCGAGTTGCTGACTACA
AUBES2450	GGGTTTTCTTTCCATGCTCTC	ATCATCTTTGCCTGGCTTGT
AUBES2448	TCCTCACTCAATTTTCCTCCA	TTTCTCGGATCCATCTGTCC
AUBES2446	AAATTCGGCCAATGCTACAG	CTTCCAGAACACAGCCACAA
AUBES2444	CCATGTTTGAACCACAAGTTTC	ACCGGACGAGTGGACTGTAG
AUBES2438	TGTTTTTGGGAGGTGAGAGG	CCCTCTGCAAGCCATGATTA
AUBES2437	AGACCAGGGGTTCTCAAACG	GCCTCTAATCCGAGGAGCTT
AUBES2433	ATATCCGCTGGGCAATTCTA	TGTCTCTTCCTGTGGGGAAA
AUBES2431	GTCACAAAGTGTCGGTCCAG	GGGCGAGTGTGAAAAAGTGT
AUBES2427	TCCCCTCTGTTTCCTGTCTG	TGACAGACCCATGCATTTAATC
AUBES2425	CAGGTGGATGGATTGTGTTG	GCTCAGTATCTCTGCGCATTT
AUBES2424	ATGGTCCCCTGCAGTATCAC	TCCCCTTGGCAGGTAACTAA
AUBES2423	TTATCCCTATACACGAGCACATAA	TCCTTGGCATCCATATTTCC
AUBES2422	TGCTGGTCTGCAGTGGAATA	GGGAAGGCCTTATAGAGTTGC
AUBES2421	ATAAGCGGCAGAACAACAGC	AGGAGATCCGTATGGGTTTT
AUBES2420	GGCAGGAGGATAGCAGAACTC	GGTCACATTGTTTGAGCCAGA
AUBES2418	AAAAAGGTATTAATTTTCACTTCAACA	AAGTCACTTTCTCATGTAAATTTTTG
AUBES2417	TGCTGTATGCTTCAAAATGAGC	CAGTGTTTTCTTGTGATGCTGA
AUBES2415	GCCATTGTGCATTGTGTTTC	TGGATGTTTCACTCCAGCAG
AUBES2412	TGAATAGCCCAGGAAGCAAT	GCAATGAATCCGAGAAACAAA
AUBES2411	ACCCTGACACAAGCTCAAAT	GAGTGACATCTGCTGGTGGA
AUBES2406	TCTCGTGTTATCGCAGCTACA	CCACACCAAATTGGCAATAA
AUBES2404	CACAGCAAACTGCCTACGAT	GATCAGCTCTCAGTAAGCGACA
AUBES2403	TTGCTTTTGTTATACGTTGCATTT	AATCTACTCCTGGCGCATTG
AUBES2401	GCAAGCACGTGACTGATTTG	TGACCTTGCTTTCTCTTCATCTC
AUBES2400	TGCAGTAATCAGTTGTGGGAAT	GCCAAGACTTTTGCACCCTA
AUBES2399	TGAAAGAATGATGCTTGTGTGA	GCTTGTGGCGTTAAAAGAGG
AUBES2398	CGCGGGTAACGATGTTTAGT	CTTCTAGAACTTTCCGCACCA
AUBES2397	CTGATTCACCCGAGGAAAAA	ATAAAACCACGCAGGAGGAG
AUBES2392	AACATCCTCAACTCCACAGAA	TTGAGCATAACTGTAGGGAAAATG
AUBES2391	CGACTGACAGCGGAGATTT	GTCCCAACCTGTGAGCTGTT
AUBES2389	ATGGTCAGATTACCCCAAGC	TTCAACGATCAGCGTTTAGG
AUBES2387	CTGCTACTTTCACCCCGAAA	CACCTGCACCAGAATCACAT
AUBES2386	GGCGCCTTCAATAAATCAAA	TACCGGTATATCGCAAACGA
AUBES2383	GGCGTGAAGGAACAAGAGAA	AAAGGAGGACGCGTCTACAA
AUBES2379	TGAGTAGCTCCCAACGATGA	TGCGTACAAGGCCAATTATG
AUBES2375	GCAGTCCAGAAAAGGACAAGA	CCACCCACTCAAGTTGCATA
AUBES2374	TTGAAAATGTATTCCAAATAAGGAC	TTGACCATGAATCTCATTTTGC
AUBES2372	CCGGTTATTCCGTGGGTATT	GTCGGCGTTCAAAGTTCAAT
AUBES2371	TACACGACACACGGCTATGG	CACTTTCTCAATCTCTCTCTTTCG
AUBES2369	TACGGAAGGCTTTGGGTAGA	CGGATTTGGGATAACTCTCG
AUBES2367	GCCATTAGACAAACCAGATGAA	TGTCCTACCCCACCCATATT
AUBES2358	AAGGCTGTGTCACCATCACA	GCATGAGCGACATGAACTTG
AUBES2357	CGTTGAGACGTCTTTGTTACG	TCGTTCAGCATAGTGTCTGC
AUBES2355	AGGGTTCAAAAGTCCACTGC	GCAATTCTCAAATGGGTAAATGA
AUBES2354	AAACTTTCCAGTCCTTGTTTGTG	GAACGCCTTGCCTCTCTTCT
AUBES2353	TTCCTTTAGTTCCTGGAAACG	GCGTTCTTATCAGCGGTCTT
AUBES2352	CTCGTGTGGTCCCCAGTAGT	CCAAAAAGTAAAACTGGTTTCAGA
AUBES2348	GCAGTGGGTTTTTAGGGTTTT	TCTCCAGTGTCGGTGCATTA
AUBES2347	AGTCAAGCAAAGACGTGTGC	GAGGCCGAAGTGTCTCTGTC
AUBES2344	CCTGCAGAAACACAAGCAGA	CTCTTGCTGATGGTTCCTTTC
AUBES2343	CGCACCCCTCTTTACAGAAA	TTTGAAAGAGCAGCCACTGT
AUBES2341	TGCTGCTTCGAGATTGTAAAG	GGTGGTGATCCCATACACAA
AUBES2318	CTGTCAATGTGTGGCTCACC	GGCAACCATCTGTGTTTGGT
AUBES2316	CAAATGTCCACAGGGAGCTA	ACACAGGCATGGTCAGTTCA
AUBES2279	TCTGCAGAGGTCAGGTAAGGA	CTGCAACGTTCTAGGGAGGT
AUBES2277	GGCTGCTGGGAACTGTAGTC	CAGATGCTCGATGAGCTGAA
AUBES2274	GGTTGCATTCGATTTTTCCA	TGCTCCAAACTGGAGGAGAT
AUBES2273	CTCGCTGGTGAACTCTAGCA	CAAAAGAAGGTTCGATGAGG
AUBES2271	CCCACAAACAGGACAAGTAGAA	CATTCAGATGCTTTGCAGATG
AUBES2269	CCGACATACACGACTTTTGC	GGGGACAGCAAATTTACACTG
AUBES2267	GTGCAGTGGAGCAGCAATAA	CAATGACCAGGAGGGTTTGT
AUBES2266	CACATGAGTGAAACAGCGAGA	TGTCCCACCTTGTTGTATGG
AUBES2263	TGCAGGAATCATGAAATGGA	CCACATACAAGGCTGCACAC
AUBES2260	ATTCATCTCGCAGGAAGCAG	TGCTCTGCACTTTTGTTCCA
AUBES2258	TGGAGCAAAACATCCAACAA	GTGACGGGAGAGGATCTCAA
AUBES2257	CGGAAGCACTAAAACCCAAG	CCCCAAATCAAGTACAGGAAA
AUBES2255	CGGAGTGATTTTCCGTCATT	GTACACTTCCCGCACACACC
AUBES2251	CATATGCACAGACACACATGC	TGTTGAAATACTGGCCCACA
AUBES2245	GCCCAAGTGTGTGTGTGAGA	GGCCATTACATTCCGACACT
AUBES2237	CACATGGAGCCAATAAACACA	CTTCCCTGAAACTGCTTGCT
AUBES2235	GGCTTACCGAGACTAGGTGCT	TGAGGAATAGTCACTACATGGAGAA
AUBES2232	TGTATCGTAGGACGCCATTT	TGCATTCACAAGGCGATAAA
AUBES2228	CCTGTTTGTTTACCTCATCGAA	AGGGCTCTGAAAGAGTGCAA
AUBES2227	AGGCTGAGAGTCTGTGGTCAG	TCTCTGGCTTCCCTCGTTTA
AUBES2217	AAAGAGAGAGACCGGGAATG	GTCTCACTCTCTCTCCCCATC
AUBES2212	AGGGGGTAAGTAAGCCCTCA	CAATCCTCGGGAGCAATAAA
AUBES2211	GGTACCACCTTTTCGCCATA	GATATTTCAGCAGGGCAGGA
AUBES2204	TGTGCTCAGTGGGTTTCACT	GCATTCATTGATTCCATGTCC
AUBES2195	GTCTCCCCCACCTTATCCTG	GGGGGTTTAGTTGCAAAAGG
AUBES2189	TGGCTGAATTGTCTGCCTAGT	GGAATATTGTACGCTGCTTGC
AUBES2182	CACACTACAGTGGAGCGACAG	TTAAAAGGGGGCAGAAGGTC
AUBES2163	TCAGGGGTTCCCAAACTTTA	TCAACAATTGGTGTGGAAAA
AUBES2158	CCCCACTGAAACTATAGGAACG	AAACCCACATCTTCATTCTGC
AUBES2152	CGGCTGACTGAGGATTTGA	AATCGCAAGCTGGAGAATCA
AUBES2148	AAACATTGCGTGAGAGACCA	ACGGATGTGGTGAGCTTCTC
AUBES2147	CAGCAAGGATATGGGGACAA	GGGAATGACACCAAAGTGTG
AUBES2127	ATCGTGAACAGGGGACAATC	CACGTCTGCTCTCTAGCAACA
AUBES2124	TTGACTCAATGGGCTTTCTG	AGAGGGTTACACACGGCATC
AUBES2123	CAGAGATGACACTATTGACTTAAAGC	GTCGACTGGAAGAACCCTGA
AUBES2121	GAGCAGTATTGGGGTCCAGA	TCTGTTTGCTGTTAAGTCATTGC
AUBES2117	CGATATTTCTTACGCTCCACA	TGCTTTGAGACAGCGTCCAT
AUBES2115	TGACCCTCAGGTCAGTCACA	CACCGAGGATATGTTCGAGA
AUBES2113	TTGGCCTATCAAAGCACAAA	GCTTCATGCAAGGTTTCCTC
AUBES2110	TTCAATTCCATCCGATGTTG	CAGCTCTTCAGTCTGCTCCA
AUBES2109	GTGGCTCAGCTGGGTTTTT	ACCACCAGCAACGTTAGACA
AUBES2108	TCATCGACCAGGACAAACAA	GTGGATTGCTCAGGTGTGTG
AUBES2104	TGGAATGATACCAGCAAACA	GGGGGAATCATGACAGCTAA
AUBES2103	TCTGAGCTCTGACCCCAACT	TTTTACACGTGACCAACCTCA
AUBES2102	GCCGTGATGCTTTAAGCTGT	GCGTGTGCTCGTGTGTTTTA
AUBES2101	AGGGGTTGCGAAATCTGAC	GGAAAGAAGTGCGTCAAAAG
AUBES2099	CGGCTTCGAGGAAAGTTTTT	CCACGCTTAAAATCGATACTGC
AUBES2097	GCATCCTTGAGTTCTGGAAAA	AGTCTGCTGTGGGGAACACT
AUBES2095	CTCTGCCCTGTGGAAGTTGT	CAGCAGCAGGTGATTTTGAG
AUBES2091	GCTGTGTGTGCCCTCATCTA	ATGACCACACCCTTCTGACC
AUBES2086	CCACCCCCACCTCTATCTCT	CTCTTTCCCCTGATATTCAAGC
AUBES2085	TGGAGACGTGCTCTAAAACTCA	CAGACTGAGCCACAGGACAG
AUBES2084	ACCCGGAAGAGAAGTGAACA	GTGGACCCAAAAAGGTTACG
AUBES2082	AGCTGGGGGAAAAGAAGAAG	TATTCCCTCGGACACAAAGC
AUBES2079	TCCACAACCCTAAATGTGGAA	CAGCCTGAAGAGACAAAACG
AUBES2078	CCACATCAACATTGGACAGG	GGTTGACATTTGGCCTCATA
AUBES2077	AGGAACTGTGGCATGAGAAA	GAGAGAAGGCCAGAGGTGAG
AUBES2076	TTCCCGTGTGTGTTATTCCA	TCCTATCTCGGCAAGAGTCG
AUBES2075	TGACCCTGTTTTCCAGCTCT	AGGGTCACATGCCACAAAG
AUBES2074	CCTCTGCTCGGATAAGACGA	GCATCAAATGACAGCTCGAA
AUBES2072	CCGAATTTGCATCTTTCACC	GCGCACACACAAAGAGGTAG
AUBES2071	TTTCCCCTGCTTTCATCATT	TTGCAGCATCTGGAAAATGT
AUBES2070	TTGCAGGTGTGACTGGATTT	TCCACTCAGATTCCTTGCAG
AUBES2069	AGCTGTGATCGTCCTGAGGT	AAGGGGCTTGTGAAGAAAGG
AUBES2068	TGTGCGTTAACTCAAATCCTTG	GCAGACCTGTCGTCTTAGCC
AUBES2067	GGAGGCCCTAAGCTTCATTT	TTTTGATGGGGGACATTGTT
AUBES2062	CCTATCCTCAAGGCAAGCAT	GCAAGAATCTGCAAAAGAAGC
AUBES2059	CCGCATAACTGGGATCATTT	CGTTTATGTTGGTGCCGAAT
AUBES2057	TCAAACCAGTGTGCTTTCTCC	CAGCCAGGAGTCCAAACTGT
AUBES2054	CAGCCGTGAGGTTCAGTCTA	TGACAGCCATGGAATCAGAG
AUBES2052	GAAAAGCCTCCCTCATACCC	CAGCCCAACTACAATGAGCA
AUBES2051	AGTCAGGGCTAAAGCTGCAA	ATATCAGCTCTTTCACCAGCTT
AUBES2050	CAACTGCCATTCTGGGAAAT	AAGTGTTGTGGCTTGAGTGAGA
AUBES2049	AGGATCACCCAGCTGTCCTA	TGCATCCTACACACGCTCTC
AUBES2047	TGCCCTCTCTTTGCTCTCTC	GCCTCTGCCATTTTTATGGA
AUBES2045	CGGCTGATGCAGACATAGTG	ATGTGCCAGGCCATGTTTAT
AUBES2039	CGTTTTCCGTCATTAGACGA	TCGCCAACCCTCTCTTTTTA
AUBES2036	AACGCCGGATAGTGTGAAAG	CGAGTGCGTCTTTGTAATGG
AUBES2034	CATGTGAGTGAGATGGGCTCT	GCCTGGAGCTTGTGTTTGTA
AUBES2025	GTCCTCTCGGGTCTCCTCTT	CAGACCCACACACACAGACC
AUBES2019	CCTGGCTCAAAACACAATCA	TGGGGGTTACAATGAACAGC
AUBES2005	CAGCGAGTCTTGCCTCATTT	TGTGGCTGAATTCTGCTGAT
AUBES2002	CGATAACGGGCTTAATCTGC	CCTGTTAACCTTTGCGGTTC
AUBES1996	CATCACAGAACCTCCAACCA	TTTGGGGGAAATTCACAAAG
AUBES1995	ACCCATACCTTGTGCTGACA	ACCCGGACAACATGACAGAT
AUBES1990	TGATGTAGAAGACCCCCATGT	TGCAGCTCCTAGTGGTATGC
AUBES1982	AATGACGACCGTGATGACAA	TTTCAAGCTTGGTAAGCACCT
AUBES1980	TCGAGTAAATGATGTTAGCTGAGG	TGGCTATAGTCAGGGGTAAGAGA
AUBES1979	GCGTAAGTGAGAACAGGAACG	TAAACTGCGGAAAACACCTC
AUBES1978	TGCAACATTTCCCCAAGTTT	GGGGACCTTATGGCACTGTA
AUBES1973	CCAGTCTGGCTATTTTCCTCTG	CTCCTTGTGACTGTGCAGGA
AUBES1971	CCACCATGTGCCCAGTCTAT	CCAGTCCGACATAGTGAGGA
AUBES1968	GCCTGGTTTTACGCTGACAT	CGCATTGAGCAACTGTGTCT
AUBES1965	TATGGCCAAGGCCGATGTAT	CCCAACAAATGGCAGGTACT
AUBES1964	TCCTGTTTTCCCTTCACAGC	GCTCCCCATCTCTCTGTTTG
AUBES1963	TCCTGCTCTTGCTGTCTTGA	GAATACTTTCCGGATGCACTG
AUBES1960	TGAATTAGCCACGACAGACAA	AGCCACCAGAAGGCTAAAGG
AUBES1959	GCAGCTGCCTATCTGCATTT	GCGATGTTCTTCTGGGTTTC
AUBES1957	TTTGCATGGTACCTTCATGG	CCCCTCGATCTATGCTCACT
AUBES1956	CAACCGATTGCAGGGTACA	CCCAGTCCAAAGGCATACAC
AUBES1955	CCACACATGCTTCCAATGAG	GGAACTCGCTGAGCCTTTTT
AUBES1952	CCCTGTTGCTACCCGTGTT	GCGAACGTGCTAACCACTAA
AUBES1951	CTGCTGAGATATGGAGGAGGA	CCACCCCTCCCTTTGTTTAT
AUBES1950	CTACACCATGAAGGGCCAGT	CTGGCCACAGAGCAGAGAG
AUBES1949	AGACCTCCATAGGCCACGTC	CATGCTGCTGATACGACTCC
AUBES1947	CAGATCCTGATCCCTGATGG	TGGACTCTGCCTTTTGATCC
AUBES1946	TCTGGAAGTGGCAATTAGCTT	AACCCTGCTCTTTCCTGTCA
AUBES1945	TATGGTTTGGGGTTTTGTGG	CTACCGGCTGACACCTTCAT
AUBES1942	GGCTCCAGAGCTCATACAGG	CCTCCCACTTTCCAAAAACA
AUBES1941	TCTCTCTCTCTCTCTCTCTCTCTCTC	TCCTGTCATTTGCATGCTTC
AUBES1936	CAGTGGGGCTCTGTCAAACT	GTGCACTATGGGGATTTCGT
AUBES1935	AGCCATGACACCTGCTGATT	TGTTGCCAGCACCTATCATC
AUBES1932	TGTCATTGAGAAACCCTCCA	TTGCTGGTGTTAGATGTGGTG
AUBES1926	CGATTTAACGCAGTGTAATGGA	CACTCACCACTCAGCACAGG
AUBES1924	GGAAACGAATGGAAAGCAAA	GTGAATTCGCCTCTCTCCAA
AUBES1922	GGGAAAATGCACGAGAGAGA	CCATGAACCCATGAACTTCC
AUBES1918	CCTGTAGGTGGTCACCCTTG	TCTTCCATGGTTTCTGTCCA
AUBES1916	CAGGGCACTGCATAGCATC	GGCCCATTTGTATTTCTTCTCA
AUBES1912	GAGCAGTGGCCATTTTGTTT	GAAATAGATTGGGGGAAGGA
AUBES1906	GCACCATAACCCTCCTGCTA	AGCGATGAGCTGGTGTTTTT
AUBES1904	CAAGCAGGAATTGTCCATGA	TCCTTCATTCCTCGTGTGC
AUBES1900	GCACAGGCAAATAAATGCAA	AAGCGCTGACACTGGAGACT
AUBES1896	TTCATTCAGCTTTGCGTCAT	TGGTTTACTTGGGACCATCTT
AUBES1892	GCATCACCATTCGTGGTCTA	TGCCATCAAGCGTTAGCATA
AUBES1891	CGCACGACTCGGACAGTAAT	GCAGAGAGTCATGTAGGGTGTG
AUBES1888	CCTGTTCCCAGATCAGAAGC	GTGACGGAGCCTGTCTCTCT
AUBES1887	CATGGAAGGAGTCTCCAGTG	CAGCACAATGCAGTTTTGAA
AUBES1886	GGCTCTTGACCTGAATTGTG	GTTGCACTTGATGCAAAGGA
AUBES1885	ATCCACCCCCTTGTCTGACT	CATCAGGCTTTGAGCAACTG
AUBES1884	CCCAGAAAAGGGATCTTGGT	CCCGTGACCCTGTACGATAA
AUBES1882	AACAAAGCTTGGCCTTATGC	TTGATGATGGTGCTGGAGAA
AUBES1881	TGTCACTTAAATCACGGAGGTT	ATCGGGCCTTGAGGTAGATT
AUBES1880	TTCAGGGTGGTTGTAGAATGC	ATGGGAACCTTTGAAGCTGA
AUBES1879	TGAAGGTTGACAGCATCAGG	GGTGCATTAACCGTTTCTCTG
AUBES1878	TGAGGATCAGGCAACATCAG	GAGTCCCTGCTTGCACTCTT
AUBES1877	CGGCCGTTTATAGCTTCTGT	TGAAGGCAGGATAAGCGGTA
AUBES1876	CCAGCTGAAGTGAGATGGTG	GGTGCTGAAGTGCCAAGACT
AUBES1874	GGATGGGACGTCAATCCAT	CCCACTGTTCAACAACATGC
AUBES1873	CTGCCCTCTGATACCTGCAT	TTGCCTGCTGAACATGATTG
AUBES1872	CTGGAATACACCCTGCATGA	TCCTGAAAACATGTCAGTTGG
AUBES1871	TTGGATAGCTCACGGTGTATG	CATGGACGCATTGTAGTGTTG
AUBES1869	TTGCTACAGCTGAGGCATGT	GAGCCGGGTTACACCTAACA
AUBES1868	GTTCTCCAGGCCCAGTCAT	TCCTCTCCTGAGATCCTTAACA
AUBES1867	TGTTCACACACATTGCTGACA	TCTGGCAACTTTTACAGTGCAT
AUBES1865	TGAAACTGGATCAGAGGCTTT	CGTGTGGAGCAATTTGAGTG
AUBES1864	CGGTCCACAAGTGGTAAAGAA	TTCCCCGTATGAGTGTAGGC
AUBES1863	AGTTGTTGTCAGGGGCTTCA	GGGTGCAGTCTATGCAGGTC
AUBES1859	TCACACCATGTGCTTCAACA	TCTGATGCCAGAACTTGTGC
AUBES1858	GCCTCCATGTCCTCCATTTA	CCTGAACGGAGCAGAGGTTA
AUBES1857	TCACTCTCCTCTCTGGCACA	CGTTAGGCGTCGGTCATAA
AUBES1856	GCTGGTTAAGGCACAAATTGA	CCCATCCCACTTTTAAATCC
AUBES1855	CTTGCCATTTCCCTGCATAC	GGGAGCAGACCAGGTAGACA
AUBES1853	CTGGAGAAAGAGAATGGAGCA	CTCCCATTCCCCACACAG
AUBES1852	GTGTTTTGGGGGCAGAACT	TCTTTCTTGGGTCATCAATCC
AUBES1847	GCTATTAAAGGCTCGGAAGG	GCCTTCAGCAGGGAAATCTA
AUBES1846	GTCACGCTGATGACTCTCCA	CACTCATTCAGTGACAGGAACTT
AUBES1843	GCGAGTTGGAGACCACATC	ACTTCGTTTTCCCCCAGAAG
AUBES1842	CCACCTTCCACTCAGGAGAC	GAACATATCTGGGCCTTCCA
AUBES1841	TCAAGGACTTTCCGTTCCTG	TTTGGTGAGAACCCCTGAAG
AUBES1811	CCTGAACTCACACTGGCAAA	TTCCGTATTCTGGGGTGTGT
AUBES1810	TGTGCAAAACCAGCACTTTC	TTGCATTTGGCCATGAATAA
AUBES1809	TCATGTCATCCGGTTTGTGT	CGAATGATCCAAAGCCCTAA
AUBES1808	CTGACGTCCTGCTCTGTTCA	TATGTGGAGACGGGGTCAAT
AUBES1805	ACAGTGCTGGTGATGCTGTC	AGCCTTCAGAGCCATGCTAC
AUBES1803	AAGGCTGTGTCACCATCACA	GCAGTACGACATCCACCTGA
AUBES1801	GCAACTGGATTATGCAGCAA	GAAACAAAGGCAACCTGAGC
AUBES1798	AGAGGCTTCAGTGTGACTTGG	TGGATGCAAGTGTGTGTGTG
AUBES1795	GCCGGATCACCATCAAATA	CCACACACTCAGTTGGCAGT
AUBES1794	CTGCATCAAACCAGCAAAGA	AGACACCCTTATCCACAGCAA
AUBES1793	TTCACCCTATCAGCCCATTC	CAGAGAGAAGCTTTTTGGTGTG
AUBES1792	TATGCACACCCAAGGTGGTA	CACCGGGTTTTCTGTCTCAT
AUBES1789	CGGGGCACATCTTACAATTT	CGTGCCATGAAAGATGACAA
AUBES1786	ATCACGGAACACACGTGAAA	TTCAGTCCCATTACACCGATT
AUBES1781	CGAGGCGAGCTGGTTTAATA	TTTACCTCTTTTCCCGCTCA
AUBES1775	TGAGGCAATGTTTGAGCAAT	CAACCCAAAAACAAACAAAACA
AUBES1773	TCAGCTTCCCTGCTTGATTT	CCCAGTGTCCCAAAAAGAAA
AUBES1772	GCATTTTCTAAATGTGGCGTAA	CAACCCTGGTGGGGTTAATA
AUBES1768	TCTCAGTTGAGCTGCTGCAT	TATCCCACCCCTTCACAAGT
AUBES1765	GCCCTTGTTTGTTCATGTCC	GGGACCAGGGTAAAGCAGTT
AUBES1764	CAATGTCGAGGCCAATCTG	AGCACGGAATGACTGCTTTT
AUBES1763	CTGCATGTATGTGGCTCCAG	TCATGGCATGCATACTAACACA
AUBES1761	GAAACACTGGGGATGAGGTG	GCTGCATGTTCCTGAGGAGT
AUBES1759	GCCCTCTGGCAATAACAAGT	TGGAAGATGGTACGGGAGAC
AUBES1754	AGAGAGGCCTTTTCACAGCA	TGTAAAGTGCCTTGAGAAGCTG
AUBES1752	GGGAGTACAGTAAACCACTTGC	CTCTTCCCCACCTCCAAGTA
AUBES1750	TCACCATATGACGGAATGGA	CTGCAGCCAGCTCTTTCTTT
AUBES1749	ACCTTGGAGAGGGAACGTCT	CTGTCTCGAAGCTGTGCTTG
AUBES1748	TGACTGTGAGTAGTTTCCCTGCT	CACCTGCAACTGCACTATGA
AUBES1747	TTCTGCTCAGAACCCTTTGC	GCAACATGACAACTCGGCTA
AUBES1744	TTTGATGCTGCTTTCACCTG	CATCCTTCCTTTCCTTCACG
AUBES1742	GCCCAGGGGTCCAATTAC	TGCGTAGGTCAGATCCCTCT
AUBES1740	AACCCTGAACTTAAAACCCTGA	CAGTGTCAGCATCCAAGAGG
AUBES1737	TGCTCAGCACTGAAATCACA	AAAGCAAGCAGTCATCACGA
AUBES1736	CCCACCCTATGTCCTTAGCA	GGTGAACAATGGCTGGAGTT
AUBES1733	CGCATCCCAGCGTACAATTA	AACTGACCGGAACTACCTGTG
AUBES1730	TCAAACCAGTGTGCTTTCTCC	CAGCCAGGAGTCCAAACTGT
AUBES1728	TTGGCCTCTAAATTTGTGCTC	GCATGAATGAGCTCACAAGC
AUBES1727	CAAAACAGTCCTGGCTGACA	TCGATCCGTGGCCTAAATAC
AUBES1726	GGTACACCAGTCCATTGCAG	CAGTAGGTGGAATGGCCAAA
AUBES1725	CCATGTATCAGGTTTGCACATT	TGTCATGTCAGTTGGAAGCA
AUBES1723	CGGACGCTCCACATAATCTA	CATGAGCCTGACACTGGAGA
AUBES1721	ACCATCGCACCTAGCAAAAC	AGTTGGAGCCAGGTAAGTGC
AUBES1717	CTACCGGAGTCACATTTCCA	GTTGCGCAAACGAAATACAG
AUBES1714	CCCACCTCATGTCTGTGAGT	TTGCATCCTCTTCCTGCATA
AUBES1710	TGCCTCAAGATGGAGGAATA	AAAGTGCTGGAGTCCTGAAAA
AUBES1704	CAACATTCAGCCAAAAGCAA	GGAAAGAATCCCACACCTGA
AUBES1703	TCCAAGCTCACATTCAGCAC	GCCCCAATTCACTAACAACC
AUBES1702	TCCCGGGATAGTCTCCAGAT	CAACACAATGCCATCATTCC
AUBES1701	CAGCAAGAGAGGGCACTACC	GCGCCTGTACATAACTGCAA
AUBES1700	ATCGCTGGAAAATGAGATGC	CGACTCTTTGCTGAGTTGGA
AUBES1699	GCACGTTTTATTTCGGGATT	ACGCAAAAAGCGACATTTCT
AUBES1697	CAGCACACGAAATTGTCCAG	TGGAGAACACAGAAAATCTTGC
AUBES1691	TGTCATGTACAAGAGCAACCTC	CACTCCTCCCTCTGCAACTC
AUBES1635	ACTGTGTTTGCCCAGGTGTC	CAGTGGAATGTCCTCACAAGG
AUBES1630	GAGCGCGAAGGTAAGAGTTG	TTCCCTGTCTGAGCGAGTCT
AUBES1629	CACGCCTACAAAACTCCGTA	CAGAGCACTTGCATCAGGAG
AUBES1626	AGTGATTGCACATTCACAAGG	TGGTACACGATCATCTTCCTGA
AUBES1624	AGCACTAAGCACAGGTGCAA	CCTCTTTTAGGTCGGCTGAA
AUBES1619	CACCGGAGACAATGTACTGG	GCGAGATACTGCCGTTTGAT
AUBES1617	GCGCTCCTCAGTCTCTCATT	AAACTGCGTCGAGTTCCACT
AUBES1616	ATGGATCTGGCACAATGGAT	TGGATCAAAGTCCCCAATTC
AUBES1615	TGATGCCTGGCTGAGAGATA	TCCCTTAAAGCCCTCAATCA
AUBES1612	TACCAGCCTTCCAAGCATTC	GTCTCTTTTCGGTCCAGACG
AUBES1610	ACTCGCTGAAGAAGGCATTT	CGCTCACTACATAGGGCATGA
AUBES1607	CCACCATGTGCCCAGTCTAT	CCAGTCCGACATAGTGAGGA
AUBES1606	GGTTAAACAGCTAGGTGCACTG	ACAGCCAGATGATTTCCAGTT
AUBES1600	CTCCCTTCACAAGCTGTTCA	CCGGGGCTTCTATAGCACAT
AUBES1597	TGGAGCAAACAACGTTTGAG	AAAGCGATTCCCCATCATC
AUBES1595	GGGTGCAATTTTTCACATGG	CATGGGCATGATCACAGACT
AUBES1594	AAATTAGGCCACGTGTAGGG	CCCTCAGTGTTGTGAACCTGT
AUBES1593	AATGGCATTTGGCTGAAGAG	CATTGCCTCGTCCAGAGAATA
[truncated: 480 more rows]
