# Supplementary material for: Second-Generation Genetic Linkage Map of Catfish and Its Integration with the BAC-Based Physical Map
Source: G3 (Bethesda). 2012 Oct 1;2(10):1233–41. doi: 10.1534/g3.112.003962 (PMC3464116; doi:10.1534/g3.112.003962)
Supplement: Supporting Information [file supp_2.10.1233_TableS4.xlsx]

## Sheet: Sheet1
Table S4: Detailed primer sequence information regarding unmapped markers
Marker	Forward primer	Reverse primer
AUBES1074	CAACCAACTTTGAACCACATTGC	GTCCAGTGTTTGGTAGCCAC
AUBES1076	CAGAACCACTGTGTCCACAG	AGCTACATAGCTGGGGAGTC
AUBES1077	GCTGAAACAGACTGTGGACAC	TCTACTGCTGCCTGTGAACG
AUBES1078	GGAAAAGCTGTTTATACCTGCTGG	TGGGTTGTGTGATGTGGCTC
AUBES1079	GTTTCATACATGATCCAGGCCATC	CGTTTCATTCCTCTTATGCCAGC
AUBES1080	CTGAAGCACTTCGGTCAACTC	CACCTCCATGCCACCAGAGG
AUBES1081	TGGAGGCGACAGGCAGGTGG	CATCAACTACAATATCAGCCGCAG
AUBES1083	TCGACACCAACATGACCGAC	ACAGGACGATGCTGGCAGTG
AUBES1084	ACGGAGTTGCAGTCACCACG	ACCATCGTGTATCGCGGACG
AUBES1089	GTAGAACCCATCACCCTTTGG	CTTATTTCCCCTACAGTGTGTGTG
AUBES1092	CACAGGCTCACCGAAACTGG	TCATGGTTACAGGCTTGCAG
AUBES1094	ATCCCAGAGGAGAATGCTGC	AAGCCAACCCCAAAGCCTCG
AUBES1095	TCCTCCCTGCCTGGCATGAG	ATCACGCACACCCCAAACAC
AUBES1097	GACAGTGCAGCGTAGTGGAG	CTTCGGTCTTCTCGAAAGTGG
AUBES1098	CCACCAAAAGTACACGATGCTC	GGGGTGTGTGTGCGTTTAGG
AUBES1100	GTTTTACTTTGAGTGTCGTGACTACC	GCTACATGCTGTGAAGCTCC
AUBES1102	AATCTCACCGTGGCCTTGAG	ACCTTGATAAGCACGTCAACG
AUBES1106	CCGATACATGCTGGAGCCAC	CCGTCAACGACAGCAACAGC
AUBES1107	TGGCTGAGTATCGGCTATGC	AGGTCATTCTGGGGTCACTC
AUBES1108	CACGGTCAAAACCCTCTGTTC	GTCGCTGAGCAGCAGCTCTC
AUBES1109	GTGGATTTCCTGTAACCGTGG	AGAGGCATCCCAAGTGGCTG
AUBES1110	AGCTTTGTGTACGGTCGCTG	AAACTAGCACGCCAAGTAGC
AUBES1114	CTCAGAGTGTTCCAAAGCCTG	AAACTTACCCTCGGCGTGTC
AUBES1115	AGGAGCAAATGCTCAAGGTG	ATATGTGTATGTGGCGTGCAG
AUBES1117	AGGGCAATGAGCGTTTCCTG	GCCCAAACATACTGGCTACC
AUBES1118	AGTAAGTCAGTATGTAAGCTCCCAG	AGTCTCACAGATAGTCCTGGTG
AUBES1119	CACAGGCTCACCGAAACTGG	TCATGGTTACAGGCTTGCAG
AUBES1120	CCATAACGCTTCCAGAGTGAC	TAAGTGAGGGAGCCGGAATC
AUBES1121	GGCTCGAACCCACGACCCTG	ATTGCGCCACAGAGACCTGC
AUBES1122	GAATACTGCATCGCCAGTCTG	ACAGACACACACACTTCAGC
AUBES1124	TCAGACGACGGCTGCAAGTG	ATCAACAGCGTGGCTGCATC
AUBES1125	GCAAGGCAAATGTGCTAACC	TGCGATGGACTGGCACCCTG
AUBES1126	AATTCCTCCAAGCCAACGTG	GCACTGCATAGTTCAGCATCC
AUBES1127	ACTTGTGGGCGTGTGTCTGC	AGACTCAGCAAATCTTGCGTC
AUBES1128	GGTTCTGTGACTGGTATCGGAC	GTCTCTGTGTGTGTGTGTGTC
AUBES1129	CTCGCCGATACGCACACGAC	ATTACAGCCTGGGGCATTCC
AUBES1130	CAGCATCACATCGACACTCTC	AATGATAGCCAGTGCCAACG
AUBES1132	GTGATGCTGTAGTGTGGTGG	AGAGAAAGCATTCTTCAAGGTGC
AUBES1135	CATCATGGGTCTCCAAAGCAC	TCTGTGGGAATAAAAACGACACC
AUBES1136	GATTCAGGCCAAGACGTGTC	TTTTCCTCAACTGCCGATGC
AUBES1139	TGGAGCCAGCAGCCAATCAG	GGAGCATCTTAGCGTTCACG
AUBES1140	CTACTTCTTGCTGGCTTCACG	GTAGAAGGTGAAAGATGCAGATTCG
AUBES1145	GCTGATGTCCGATTGCCCAC	AGGAGGTCTGATGGTTGTGG
AUBES1149	ACAGCTACACACCCACAATG	GAGGCCCAGTACAACGTACC
AUBES1150	AGCCATCTGTGTGTGGGGAC	ACATGCCCCTCTAGCACCAC
AUBES1151	ACAGAGGTGACTCAGGGCTG	GATTGTGAGGTAGGCACTGC
AUBES1152	AGAGTCGTTACTGACCGCAC	GCCTCCATGTTGACGCACAC
AUBES1154	TTCTGCTCCAGGGGTGCTTC	TCTAAGTCTTATACCTGGGGTTGTC
AUBES1155	TCCACAAATGATCCGAAGTGC	CATTGTCTGCCAACCGAAGC
AUBES1156	GAAGCCCTTTCTCAGGAACG	CGCGCTTTATTGTGAGCATGAC
AUBES1162	GGGTGTATCCCACTGCTCAG	TGTTCATGGCTTGCGGTCAG
AUBES1163	GTACACCCTGAAGGGCTTTG	TGGGACGATGCACGTTCCTG
AUBES1164	TGATGGCCCGTTGTGGTGTG	CTGGGTTTAGGGGTGGAAGC
AUBES1165	TCCGAACCTACGAGACAAGC	AATGGCAGAAGGTTTCCACC
AUBES1167	GCCTCAACAATTTGGTGTGG	GGGCATTAACATTTGACCGAGG
AUBES1169	ACCTCACACCTCGGAGACAG	TGCCTTGTACCCGATGCTCC
AUBES1170	CTGGAAGCAATGTGTTGTGC	CCTATAAGAAGTTCACTACAGCCTGTC
AUBES1171	ACATAATCTAGGTTCGCCTCTGG	GTCAAAGATACAGTGGAACTGAGC
AUBES1172	TCCCTGTCCACCCTCCATCC	AGTGTTTCCTTGGCGGTGTC
AUBES1174	ATGTGGGCTAACTGCACTGG	CGTGTTTGTTTTCGTGCAATGC
AUBES1180	ACCATGTTGAACTGCTCTTCAC	GGACACATATCATGGCTTGTGC
AUBES1181	GACCTTGATAAGGCGACACTC	ACTGAAAGCATCTGTTGCACG
AUBES1184	CTCCAGAACTGAAGCAGCAC	CACTACACACTTGACCATCGAAC
AUBES1189	CGAAGTCCATAGGGGTTTCC	GTGTATTTAATCCTGGGGTGAGTTG
AUBES1225	TCCTGAGCAAACTGAGCCTG	ATTGTGATAGTGTGCTGTGGTG
AUBES1226	ACCTGCTGCTGAGGCTGACC	AGGGAGAGCGAGTCGCTGTG
AUBES1229	CTGGAGACAGCGCGAGGGAG	AACCCATCAGACACGCTCAC
AUBES1231	GGACGGGCTCCTGTTGGACG	GTCGCATCATTTTGATTGCAGC
AUBES1233	ACAAGCACATACACACGAGC	ATGGCTATGGGACTAGGTGC
AUBES1234	TCGATTATCGGTATCGGCTGAG	GGTCAGACATATTCCTCCAAAGC
AUBES1243	AGCATAAACAAGTAGCAGACAGC	CGGCAAGTCGGGCGAGTTTC
AUBES1244	CAGAGGCAATGATGTGGTCC	TCCTCCTCAGCAGGGGTGAG
AUBES1259	GGGGTTATCAGAGTGGTCCTG	TTTGTGTGGTGCTATGCTGC
AUBES1264	CGGCTCAGGTCGCTCATACG	AAGGCAGCAAGGTGAGAAGC
AUBES1266	GCTATTATGTGTCTACTGCCAATCC	TAACAGCCGCTCCTGCATCG
AUBES1268	TGCCAACATAAAGAGAAGCTGG	ACTCCGCCGTTCAGTGCGAG
AUBES1269	AGTCAAAGGCTTTTCGTCGTC	ATGGTGATGGAGCCTGAGAC
AUBES1270	CAGGTCGCTTGTGGGATGAG	CAGCCACTCCTCGGTGTGTG
AUBES1272	TAGGGTCCACAGCCAGCCTG	TCCTCATCTGGGTGACAACG
AUBES1274	GTGGTGAGTTTCACTGACTCC	GAAAGAAGCAGAACGAGAGAGG
AUBES1275	CTCTAACTAACCAACCCACAGC	TCGTAGTGATCCACCACCTG
AUBES1278	TGTCGTTCAGAAAGCCGCTG	TCAACCCTGCAACGTCACAC
AUBES1286	GGACATTCTTCAGCAGCCAG	GAATGGTATCCTCGCCAAGC
AUBES1288	CTTTCAGTGAGGGCGTTTCC	ACTAGAACTCTGGCCTAGCAC
AUBES1289	TAACGGCACATCCCCAAGTG	AGCTGCAAAACCTACAGCAG
AUBES1290	ACAAGTGGGAAACACTGTGG	GTGTAAATGTCCAAACATGCACG
AUBES1294	TCGCAACGACTGCACTGGAC	CTGTTGCACCACTAGGGAGC
AUBES1296	ACAACAGCACAGTCTGCCAG	CAGACAGTGAACAGGAACTTGC
AUBES1297	CTGCGAGGACTACGGCTCTG	TCTTCCGTCTCTCCGCACAG
AUBES1302	GCTGAAACAGACTGTGGACAC	TCTACTGCTGCCTGTGAACG
AUBES1303	AGTTCCCTGGCTCGGTTTGG	GAACAAGTGCTGCACGGAGC
AUBES1304	TCAGCTCCGTCACCTCCGAG	ACACAACATGGACAACGAGTC
AUBES1320	GTTTGGTCAGGGCTGATGTC	CACACTGACGTACATACGTGC
AUBES1321	TCGGAACCTTCGAGTTCACG	AGGTAACAGCATCCACCCAG
AUBES1324	GGTGAGTTCCTAATGCTCGTG	AAGTCTCTGGTGTCGTGTGC
AUBES1326	TCAAGGCCATTTCTGCACTG	TTAGGATCGGTTAGCCGCAG
AUBES1336	CACGCGCTCGAACCCAGAGC	AGTCTCCCAGCACCGGCACG
AUBES1339	AGTGGTAGATCACCTTGGGTC	TCTCCACATCTGACACCTGAC
AUBES1341	CAGTAAAACACAGATGGTGTCTGAC	GATTTCACATTTTCTGGCAGTGC
AUBES1342	TGAGAGCCCAGGTGTCTGTC	AGGGCATCCACAGCTTCAGG
AUBES1344	GTGGTCATCTGTGGTGTCTG	CATGACTTTTGCAGGTCCTCC
AUBES1346	TTTACCGGCTGTGCGAG	TGCCATTTAGCGGCCTG
AUBES1347	AGCAAGACTGGGGTGC	AGCATCTGTTGCACGCTG
AUBES1349	GTCCTTCCCCGCTCTG	TGTATTGGCACCCCTTTCC
AUBES1350	CACAGGAGTTCAGCATCAGC	AGCGTGGTTCACACTGC
AUBES1356	CCCCATTCACCTCGACATGG	GCGCAAGTTTAAGGATGTGTGC
AUBES1358	CAGTGGAATGTCCTCACAAGG	TGACTGTGTTTGCCCAGGTG
AUBES1359	GATTAGGGCACTGAAGTCACG	ACACTTCTCAGGCTCTCCAG
AUBES1363	TTTTCTCCTGCCGGTGG	TGGACGGAATGGTCTGGAG
AUBES1364	GGAAGTCTAAGGCTGTGTCAC	GTCAACGCCGAGGTCAC
AUBES1365	TCTCAAAATGGTGCTGGAAGTG	GCTTGTTCCATCAATAGCCAGC
AUBES1366	ACTCTCCAGGGGTGACG	TCAAAGCAGCAGCCTTCTC
AUBES1369	TGAACGCACACGCTGAC	CAGAGAAATCTGTCTTTGTGCTCC
AUBES1371	CATCTCTGCCTCCAAAGCTG	CACAGAGGTTCTGCCATTACG
AUBES1372	CCTGTGGTTTGGTGGGTG	TGCACACATACATGCTGCTG
AUBES1376	CAGTCCTGAACTCACACTGG	TTCTTCAACTGTGTGGATGAGC
AUBES1379	GTCTGGTGAACGGGTTTGAG	GGAAACAGACTCCACACTGAG
AUBES1389	TGCCATCTTGCCATTCCTG	TCATGGCTCCAAGGTTGC
AUBES1390	GGCTCGGTTTGGCTCTG	CAAGTGCTGCACGGAGC
AUBES1391	CAGGTTCTCCGGTTTCCTC	TCATGCCAGTGCATCACAG
AUBES1392	ACCGTGTTTTCTGAGCCAG	AGAGAAACCCTAAACTCACAGTCC
AUBES1393	TGGTGCTCGGGAGTCTC	GAATGCCTGACTCTGGGAG
AUBES1394	GGGCATAATGCTTTTGCAGC	TGGGTTGTAGAGGTATCCTGC
AUBES1397	GACATATTGGGCACCCCTG	TCCCTCTGACTACACCAGC
AUBES1398	ACAGAAAGCGTTCAGCAGC	TTGTGAAGCTGGTGGACG
AUBES1400	AGGGCAATGAGCGTTTCC	TCAAAGCAGCAGCCTTCTC
AUBES1402	ACCTTTCAGTGAGGGCGTTT	ACTCTGGCCTAGCACCATGT
AUBES1403	CAGCCTGTATATTCCATGCAGA	CCCGAGGGTAAAAATATGGA
AUBES1404	TGCTCAACTCCTGGTACTGC	TTTGTTAAATGGCCGCTAGG
AUBES1408	GATGTGTTGTGAACGATGTCA	CCCATGTGGGTTATTTCCAC
AUBES1409	GAAGTGCTTTGGATGGAACC	TTTTTACACGCCTTCCCAAG
AUBES1415	TGGCCATACTTATACTCTTACTCAAG	GAATGCCCTAAGTGGTCATGT
AUBES1416	TCCTTCATGGTGGAAACAAA	GGTGCCATCACATGTCTCAC
AUBES1419	GTCAGTATGTAAGCTCCCAGC	GCCACATTTCAATTTGGGCTC
AUBES1421	ACAGACGCATGACAGCTTC	GTGATGAGTCAATGCAACTCAGG
AUBES1424	GGAAGCTGTCACAAGGTTGC	TGTCCGTAGATACTGGTGGAC
AUBES1425	AAACATGATACCACACTGTCTGC	TCGCTGTGCAGCAAGTC
AUBES1426	CCTAACCAGCTTCCCACAAA	TTGGCTTCATAACAATTCCAAA
AUBES1427	TTGGTTTATCAGCGGGACAT	CGCTCCTACTGTGGTGATTG
AUBES1428	GTCTTTCGCACCCTGTCTGT	TGATGGAGGAGTGAATGCAA
AUBES1429	TCCAAAGACATGCGCTGTAG	CATCACAGGCCACGACTG
AUBES1431	TTGAAACTGGACAGCACTGG	AAGGCCTCTTACCTAAACAGCA
AUBES1432	TCACCTAAAAGAATCGGCTCA	CATTCATTCATTCAGTCGTTCG
AUBES1433	CAGCAGGGCACATTTTCAG	TGAAGGTGCATTTGCATTGT
AUBES1437	ATATGAAGAGGCCCGTGAGA	TTACGTTCCATGACAGTGACG
AUBES1438	GGCTCAGACTCTCCTGTCAGA	TGGAAACAGACTCCACACTGA
AUBES1441	CATCCAGACCTCTGAGGACATA	TGGTACAGAGAGAAGGGGACA
AUBES1443	GACCAGAATGCCTGCAGATTA	CTGTCTGAGCTGGAATTGGA
AUBES1445	CAGGACCAAGCTTCACTGAG	AAGAGGCAACACGGAGTGAT
AUBES1450	GGAAGCAGGAGCATCAGAAA	CGTTCATTTTGCTGAACGAG
AUBES1451	CACACCCTTCTGTCACTTCG	GGAACCCCAGGCTACATCTT
AUBES1453	GCACTCTCATTCGCTCTTCC	CCTGTGTTGGGTCAGTGAAG
AUBES1455	GCTACAAAAGCACGCCCTTC	CCGAGCTCATTTCCATTTGT
AUBES1462	TCAACACACATCTCCCTCACA	GTTGTCCTTGACAGCTGTGGT
AUBES1467	GGCTAGAAGCTGCTCGAAGT	TAGTAGCCTGCATTGTTGAG
AUBES1469	AGGAAAAGTCCTTGGCTTCC	GTCAAGCAAATCTATTGCCAAA
AUBES1470	CGTTACCCACAAAGCCACTT	GGTGAATTAGATGGTGTAATGCTG
AUBES1472	GCGTGTACTGTTGCCTGAGA	ATGGGGGTGAATGCAATATG
AUBES1474	GCCTTTCCTCCCTCTTTCTC	GCCAAGGTGTGTGTGAGTGT
AUBES1475	GGTTTCAAGTCAGGGGACTG	TGGGATAGGCTCCAGGTCTC
AUBES1476	TCCGATACCAGTCACAGAACC	TGTTTTGATCTGTTCCAATTGAC
AUBES1477	TAGATCAATTGCTCCAGCAC	CCGTGCAAGTCATGAAACAG
AUBES1478	GGGTGGAGACAGACACACG	CTCTCACCACACGCTGTCAC
AUBES1479	CCGGGTTTCTCAGTCTCTCA	GGGAGGGTTTGGTCATGGTA
AUBES1480	TGGTGTTGGAAATTGTGTGAG	CTTACACTAAAATCTCTGTCTG
AUBES1481	GGCAAACGAACTCCCATAGT	CCTTCCAGTGTAGCCCTCGT
AUBES1485	GGTTCATATTCCCGAAAACA	AAGGTAAAAGAAACATGACTGAACC
AUBES1486	CCTTCCGAAACAAAGCAGTG	TGGATTAGTCCTCCCCACAC
AUBES1490	TACGCTCACTGCTGCAAGAT	TGCACTTCTCAGGAGTAATTGAG
AUBES1491	GCAGGCTGCATCTGAATTAAC	GGTACCATTTGTTAAGTCTGC
AUBES1493	ATCATTTCGTGCCAGTCGAT	TTTACTGACAAATGCCACACG
AUBES1495	TTCTGCTCCTACTCCTGTTGC	AGCCGAAGCTTGGATTTTCT
AUBES1497	GCCAGGAATGGAGTTTTCAA	CTGGGATAGGCACCATGTTC
AUBES1499	CAAACAGTACAAAGAAACCCCATA	CATAGAAGGGGCAGCAAAAG
AUBES1500	GAGGATGCCTTGTCCTAACA	TGGCATTTTGCTGCTGAATA
AUBES1503	TGCTCAAACCAAATCACACAC	AGGCATGTGCACACTACTGG
AUBES1504	GTCTGTTCCTCAGTGCACCA	AAGAACACAAGGGGTACATAACA
AUBES1505	ACAATACTGGCCACATGCAG	TTCCCCTTTAAAGCCCTGTC
AUBES1507	CCCAGTGGTTTTCAAAGTGG	AGACTTCTGAATATATCCCCCTT
AUBES1508	CATGGCCAAGCATTGTATGA	TTTAGTGTAGGGCTGGGTGA
AUBES1509	GCTTTTCAGCACAGCCTTCT	TCCTGCCCATTTCCACTATC
AUBES1510	TGAACTGACAAAGCGAAACAC	GTCAGAACTGGGCATTGGAT
AUBES1511	CGCTACAGCACAGAAAGCTG	CTCCACAGTATGTGCATTTTTG
AUBES1512	AACGGTGTACTGGCCCTTTA	CGGATGCTACAGCAGTGAAA
AUBES1513	GACGTGACTGGCAGCCTAAC	TTCTAAAGGGGATGCCTGTG
AUBES1514	TGTGAAGAGGTCTGAGACAAGA	AGATACCAGGGGATCCCAAA
AUBES1515	TGGGAGAGAAAACATTTGCAG	TTGGGGATTATATTCATGTGACC
AUBES1516	TACACCCTGGAGCTGTGAGG	GGTCTGTGACTTACCACCACCT
AUBES1517	CGTCCAGTTCTCGGTAGGTC	ACAGGAAACATGGCAAGCAC
AUBES1518	GTGTGCCCCAGATCAGTTTT	TGTCCTTTATTTCAAGTATCCCAAA
AUBES1519	GCGAACAACTAAGCCACCTG	CGTCAAATCTGGGTACTGTCG
AUBES1521	GTGGGCACAATTTTCACAAA	CCATGCTCTTTCACACGAAG
AUBES1522	CCAGCTGAAGTGAGATGGTG	GGTGCTGAAGTGCCAAGACT
AUBES1523	GCAGTACACTCTGGGGAAGC	CACAGAGCTCTCACTTTTGGTG
AUBES1524	AAGCCTGATGGTGACATTTTG	GGAAGGAAGGCCACACATAA
AUBES1526	CCCTGCCTCACACCATTTAC	AGAAAAAGTGAAGCGCTGTG
AUBES1528	TCCTTCACAGTAGACACCATTACAC	TGTGTGCATCTGTGTGTGAGA
AUBES1532	CCGGACTGATAACATCAAGACA	CTTCCCCTTTTTCCAATCCT
AUBES1535	CCTCAGTAACTGGCAATCACA	ATGCACACGCATACACACG
AUBES1537	GCGGTACTGTACTTCCATCCA	CCTAGGAACCAACATCGTTGTAA
AUBES1540	GGTACACCAGTCCATTGCAG	CAGTAGGTGGAATGGCCAAA
AUBES1541	TGAGAAGCTGTTTTTAAGGTGCT	GCTGTAAGCAGCCATGTTGA
AUBES1542	ATGGGTTTGGTTGCCAAGTA	GCAACCAGGATCTTGTGTGAA
AUBES1545	TTGATTAGGGCTGAGCAATG	CGTAGCTGCCTATCTGCCTTT
AUBES1546	CAAGGGGAGTGAAATGGTGT	ACAGGCCATCAAATTCCTCA
AUBES1549	AGGTGCAGCACTCCTAAACG	CCTCCCACCAGATCAGTGAA
AUBES1552	GGAGTGGAACGCTGTGTTT	GAAAGCGCAACACATTGAGA
AUBES1554	CCATGTGCTGAGTATGGCATT	TGTGGGCACAAATGTGTACTT
AUBES1556	TGCAGTTTAGCGTGTGCCTA	TGCACATATTCACTGTCCATAGC
AUBES1557	TGTTGACACGTCCCATTCTT	CGGTTATCGGTGTCGACTG
AUBES1558	TCTGCAACCTCCAGCCTACT	CCACATGAGTGGGAGTGATTT
AUBES1559	CACAGACTCGTGGCTTTTTCT	GGTGGCACTTGCAAAACAT
AUBES1560	TTGTACAGTATTGTCATGGGTCTG	AGCAGGTGAGAGTGCTTTGA
AUBES1561	CAAAGGACATTCATGTGCAG	CATTCATTCTGGTACAATGCAG
AUBES1562	TTCTTTGCACTCATTCGTGTG	ATCACACGCCATCCATCAT
AUBES1568	CGTCGACATGGATCAGTCTT	ACCCACGCCTTGACCTTT
AUBES1572	GGCTGTTTGCCTCTTAGCAG	CTCAGCACCATATGCCACAC
AUBES1573	CAGAATGCACGCTGAAAGAG	AAACAGTTCAGACTTCAGTGCTC
AUBES1574	GGTTTCACTGTGCGTTGATG	AAATGCCGAGTCAGGAGTGT
AUBES1577	GCACAGAAGGGCATTCTACA	GGAGTCGCAGTCCTAAGTAGC
AUBES1578	GAAACATCAGCACCAGCACT	CACACTCCTACAGCCCTGCT
AUBES1579	GGCAGTAACACCATCAGAGGA	CAACTGGTGACCTGCAGAAA
AUBES1580	TCAGTACACACAGGCTCTATCCA	AGTACCACGGCTGTTTGAGC
AUBES1581	GATGGTGTCATTAGACAGTGCAA	TGCCTTAGTGTTGCTTCACAG
AUBES1582	GCGAGATGCCTTGCTATTTT	TTTTCGGCCCAATTACAGAG
AUBES1583	CTCCCAATGGCAGGCTAAC	TTTCCCACTCACCCATTCAC
AUBES1584	AAACGCATCGCTTCCATTTA	TCCTTGCAATAACAGGGATGT
AUBES1585	CTGGAATACACCCTGCATGA	TCCTGAAAACATGTCAGTTGG
AUBES1587	CAGGAACTTGTATTGCGGAAG	TGTTACCACCCCGGAAATAA
AUBES1588	CCTGTCATTCCCTGCTTAGTG	TTTTGGTCCAGAACATGGAG
AUBES1596	GAAAGACCACCAGTGTGCTG	GTCCTGTGACCATGTGACCA
AUBES1598	TGAAGTGACCTTGGGTGTCA	TTGCATCAAACCTGAAATGC
AUBES1599	TGAGGAATAATGCCACCACA	CGCTCATGCTCATCACCTC
AUBES1601	TCCCTGCATTCCTCTCAGTT	CAGCACATCCTTCTGAGTGC
AUBES1602	AGGAGCGTGGAGCCTATACC	CTGCCATCTCCAAATTGTCC
AUBES1603	AGCAGCCCGCATTCTATGTA	CTGCAGCAGAACAGCACATT
AUBES1605	GGGTTAGGCGTTAGGGGTTA	AGCCAGATCCGATCACTCAG
AUBES1611	GTGATCGAGGCTATGCCATT	TAGCCCGTACGTGTTTATGC
AUBES1618	GCTTCATCCACCTACACATGC	GAGTTCGGAGAAAGCACACC
AUBES1621	CCCTGACCAGGATACAGTGG	GGGAATACTTTGTGGGTAGTGC
AUBES1623	AGGGAGTGCAAGTTGTGGAA	CCTGACCTGCACACTCATTC
AUBES1625	CCACCATGTCCGTGACAATA	TCTGACTGCTCGGGTTTACA
AUBES1627	TGGGATAGGCTCCAGGTTC	GCCAAACAGCGACAACTCTT
AUBES1628	ACCACTCACCTGTGCCTGAA	GAAGTATGCATGGGGATTGG
AUBES1631	CAGTGTGAGGTGAAAGCACTG	CTGTAAGCTCACTGCCACCA
AUBES1632	TCTGCACAGCATCACTCCAT	AAAGCCGGTACCTCATTCCT
AUBES1633	GTACCCCAGGTGTGTTTGCT	CACAGTGCTTTGTTGTGACG
AUBES1636	GTCCTTCAAGCTGCCAGTGT	GGTGCAAGGAAAATGACAGG
AUBES1690	CCCAGAAGCCTTCATTGTGT	GGGAGAGGGCTTCTTTCTTC
AUBES1692	CGAAGACCTTCGCAACCTTA	GCATGCTTGAGCGAGTCTTA
AUBES1695	TGGGTTTCCCTGGTACTTTG	ATTCGGTGCTTTTTGTGCAT
AUBES1696	GGGTTGTCTGAATGCTCGAT	CTCCCGATGGCAAGTTAGTG
AUBES1698	TGCGTGGTTACTCAGGTTTT	TCCCCACAAATTTTCTTCCA
AUBES1708	GTACCGATGCCACCAAAAGT	TTGGTCTGCCACCATATCAG
AUBES1709	TGAGATGGGTTGACATGTGG	CGTTGGTAAACTGGGATAGGA
AUBES1711	GAAGCACAACAGTGCCAGAA	CAATGTTTGTGGTGCTTGGA
AUBES1712	AGGTCTCGTACCAGCCACTG	ACCCCATGTTTGGGTAATGA
AUBES1713	ACCCAGAATACCCAGCTTTT	TTTTAATGCCGCACACTGAC
AUBES1715	GCTGATAAATGTGACCTACACACA	TGAGTGTGAGTGCTGAGCTG
AUBES1718	CCCTCTGAGGAAAATACATGC	GGTGGGATTTGTGATTTCCA
AUBES1724	GTGACTGGAAGCATGGGAAT	GCAGTGTGAAGCTATGTCATGTT
AUBES1729	CTTGCTCCACAGCAAGAGC	CAATGTAGCCTTCGGACAGC
AUBES1735	CCTTTAAGGCCATCTGTTCC	AACTGAGCCAAGCAAACTGC
AUBES1738	ACTTCCCAAAAACCTGCTGA	GCAAGATGGGATTCCAGTGTA
AUBES1739	AAACGCATCGCTTCCATTTA	TCCTTGCAATAACAGGGATGT
AUBES1743	TGGCTAACGACATGTGACCT	CGCTGAAGAGCAGAGAGGTT
AUBES1745	CACAGGACAAAGCTCGTTCA	AATTGGGCTGCTCTCAGTGT
AUBES1751	CTGCATGTACTGCCCATTTC	AAATGGAGCGTTATGGGATG
AUBES1753	CGTTGAATCATTTGGATTGC	CATTGGGAAAAGCCCTCTAA
AUBES1756	AGCAACGTAACAGCCAGTCA	CCGGCATTTCACGGATATAG
AUBES1758	GCCAACCTTCCTTTGCTCTA	AGCTGGGACAAAAGTCTTGG
AUBES1760	GACTTCGCGTTCCGTAGTTC	GCGGTTTGCCTTACACAATC
AUBES1762	CGCTTTCCGTCACCTAAATG	CCCAAACTGACGGAGTGAAT
AUBES1766	AATGTGTGGTTACGCCCAAG	CACTTGGTAACCAGCCCTGA
AUBES1771	TGTCTTCCAGGTCCAGCTCT	GGCTCCTTGGAGTCAGAGAA
AUBES1776	GAAGTATACGAGCTGAGGAGTGC	CCCTTCTACTGTCCCACATATCC
AUBES1777	TTTACCCGACGCTTCTATGG	TCATCCGTCAGATTTAAACACG
AUBES1778	TGGTACAAGATGGGCTGGTT	CCACACACAGAACTGTCACTCA
AUBES1780	GTGCAGCGAAACTGAATCAA	AAACTGCTGCGGGTCTACTG
AUBES1782	CAGTGGTGAATGGTCTGCAC	TTGCATGGCAGCTCTGTTAC
AUBES1783	GGTTGGAGAAACCATCGAGA	CGTCCCACAAGGTTCTGTTT
AUBES1785	AGGCATGAATCAGGCACTTG	CGTCTAAATGGGAAACAAAATG
AUBES1787	TGGTGGTGGTAGCATCATGT	CACCCGACGTTTTTGTCTCT
AUBES1788	TTGCATACCTCCACTCCTCA	AGATGCAGGCAAAATGGAGA
AUBES1804	TGCACTTTGGTGTTGGTGAT	AGCAAATCAGCTGGAGGTGT
AUBES1806	ACAGACGGATGTGGATGATG	CTGGGAAAACCCTTCCCTTT
AUBES1807	CTCTGTTCGTTTCGGGGTAG	GCACACCCCATTATTTGGAG
AUBES1838	TCCAGGATTGACCATCAACA	CTCCTGCAGAATCAGGCTTA
AUBES1839	AGCAAGTGGGAGCCATTTTA	CCAGTGCCTTCACGTGTCTA
AUBES1840	TGGAACACAGTCCTCTACCAAA	GACTTGTGGGAATGTTCTGGA
AUBES1844	CTTCTGGGGGAAAACGAAGT	TGGCACTGAGCATCCATAAC
AUBES1845	CCAATATTAGTGGAGGGCACTG	GGAGGCATGGTGTCTTGAAA
AUBES1848	GCATGCTCTCTTAAGCCCTCT	TGCAGCCTGTAAGCAAATACA
AUBES1849	GAGATGGACAGAGAGATGGACA	GCTCTGTCTCTCCCCCTCA
AUBES1850	TGCATATATGGTGTAGCAAGAGC	GCCGTCTCTCACACACACAC
AUBES1851	TGCATATATGGTGTAGCAAGAGC	CTACTTCCTCTGGCCGTCTC
AUBES1854	AGGGGCTGCAGTCCAGAT	GGTGGGTATGTATGTCTGTATGTAGG
AUBES1860	GTTGCCAGTGGAACATCTCA	CTGGGATATGCTCCAGGTTC
AUBES1861	GCCATTTATATTGTGCCTGTTG	GCATAGGAGTGGAGCTTCAAA
AUBES1866	GCTGCATTCTAGTGCAGAACC	TGTCTCAATCCTTTGCATCA
AUBES1875	CGTGGTACAGGGACAAAGGT	CACGTTTCTGTTTAACGAGCAC
AUBES1889	TCCGTTAATAATCGGCTGAGA	GCTTTTGCAGATACCCAGAAA
AUBES1893	GCACACCAGTGGTTTCTTTCT	CACTGAAGACATTTGGGTTTGA
AUBES1894	AGGTGACGTGGCAATTAAGC	TGACATGCAGTCTTGCTGAAG
AUBES1895	GCATGGCAGCTCTGCTACTA	CCTCACCTGGAAATCCCATA
AUBES1897	ATGGCATGAGAACATCAACG	GGAATCACGGGAAGACGTTA
AUBES1898	CAGGCCAAACGGACACAT	ACTGCAGTCACTCCCTCCAT
AUBES1899	GCAGAACCCTATGTCTCTCCA	TGAAACCTTGCCTCTCTCTCTC
AUBES1902	TGTCAAAACTAGGGCTGCAA	AAAATGGCACGGAAAGTCTG
AUBES1903	CAGGTCCCTGTGTAAGGTGT	GGGTTGTACCACAGTGCTGA
AUBES1905	CATGAGGTGCACAGTGGGTA	TGGGTCCTGAAATGCTGATT
AUBES1907	TATCGTCGAGCAGAGGTGTG	GTGTGTGTGTGTGTGTGTGTGT
AUBES1908	CACATGCATACATGCACTCAA	TCTCCGGGAATAGTGGTCAT
AUBES1909	CACCCCTCATTAAACACATGC	CGCGCACACACTTTAGACAC
AUBES1910	TTCCCTTTGAAGGCCAGAG	CACTCCCTCCCTCTCTCTCTC
AUBES1911	TTCCCTTTGAAGGCCAGAG	CTTTCTCTTTTTCTCTCTCTCACTCC
AUBES1913	GATGGGGTGCTAATCCATTG	GTTGTAGGCTGGTTGGCATT
AUBES1914	ACGTCCATGGAGCAAGTTCT	GCAAAGTGTCATTTCTCCAGTG
AUBES1915	AGCGACCCAATATCAAGTGC	AGTGCAGCACACGAGCCTA
AUBES1917	GCACTGCATAGCATCAGGAG	GGCCCATTTGTATTTCTTCTCA
AUBES1919	AAGCCTGAACCATTCAATGTC	CGCAGTAAGGGTGTGTGTGT
AUBES1920	TCCCATATACTGGCCCACAC	AGCCCTCCTGAGGGTTAGAA
AUBES1921	GGCTTTCTAAGCTCCCTCGT	CTCTCTCTCCCCATCCCACT
AUBES1923	GGGGGAAGTTTCACATTGGT	GTGTGTGTGTGTGTGTGTGTGT
AUBES1925	CAGGATGTGGGCAGGTTTAT	TCAAGTCCAGCACCACTGTC
AUBES1927	ATTCTGACCCATCAGCAAGG	CCAGATTTTCAATGTGGTCTCA
AUBES1930	AACTGGGAGGAAAGCCACTT	TCACATCTCCAAGATCCCAAG
AUBES1931	GCAGACAGCTGGATGATTTG	CAAGCTAACGCACCAGTGAC
AUBES1934	GAACCCGTTGTCTTCTCCAA	GCCCTCACTGCAAAAATACC
AUBES1937	TCCTCTACTGCTGTCTGAGCAC	CCAGCAACAGAGGTGTGTGT
AUBES1938	TTAAGAACAGTGGAGATACAGCAG	CAAACACGCACCCTTCCT
AUBES1939	GAGTGATGGAGGAAGGGAGA	CCATACAGTGCTCCCAGGAT
AUBES1943	TTTTGGAAAGTGGGAGGAAA	GCCATATTGTGTGTTTTGTGC
AUBES1944	AATGCTGACCTGTGCATGAG	CGTGTGTGTGTGTGTGTGTG
AUBES1958	GTGTTGGCAAGGTAAGAAGACC	TCCGACCATATTGTGTGTGC
AUBES1961	ACAACCACTGGCCAATCTTC	CCATCATGTCTTGCATGCTC
AUBES1966	AATGCTCCCTGGGGTAGG	GCCAGCTCATGAAGTGTTTG
AUBES1969	CAGCTCGGTGTTGTTGTAGC	AAGGCGCGAGTCTAGACAGA
AUBES1977	CACGGAGCTTCTGAACTGTTT	CCATGTCAAGAATCGAGGGTA
AUBES1981	ACACCCTTCTGGCTCCTTG	TGCAAGCCAAAAAGAACACA
AUBES1983	GACAGCAGAGGTGGCCAATA	TCTGCAGGTGCTTTGTTAGC
AUBES1984	GTGTGAAGCGAGCCACATTA	AATTGCAGACAATGCACCAC
AUBES1986	AAGCACACAGTTATGCGATTG	TTTTCCTTCTCCACCCTGTG
AUBES1987	GGATGTGGCCCAATTAACAT	GACGGGGGATCAATAACAGA
AUBES1988	CCCTCACCAGCCTCTCTTTT	TTGGAAGGAGTCACCAGTGTT
AUBES1991	TGGTAACCAGAGGAGCGAAC	AATATGCCAGGTCTCCTAGCC
AUBES1992	AGCACAGAGCTGACATAGGC	ATTGGAAGGTCCGCACAA
AUBES1993	GAGCGGTTTAAATGCACCAT	CAGAAATTCAGCCAAGAGCA
AUBES1994	CATGCATGGTAGGCTGATTG	ATAGGGTGCCAATCCATCAC
AUBES1997	AACCGCAAGTCTTCGACAAT	CTCCCTGGTCTCCTGCATAG
AUBES1998	TGTGTACTTTGTGCCTGAGTGA	TGGGTGTAAGCCCTCTTGAC
AUBES1999	GCAGATGATCAGTTCACCTCAG	AATCCGCTGCCTCTTCAATA
AUBES2000	AGTTTCTGGCATGGCTCACT	CCAGACCAGAGCTTTTCACC
AUBES2001	ACGTGCACAATCCATGTACG	CATGACACACATAGGCAGCA
AUBES2003	CGGGGTCAGTCAGATCAGTT	TCCATGGTAAGGTTCTGGTTG
AUBES2004	TGCATGCATATCCTCGTAAA	CCTTGGCAGAAGTCTGTGTG
AUBES2006	CCATTCTCATGCACAAAAGC	CACCTACCAGAAAGGTGAAAGG
AUBES2007	CTTGCAGACATAGGGCACAA	GCACGCTTTTAGTCTGCAAAT
AUBES2008	TGCCTGCTCACTGAAAGAAA	GCAGTGGTGTACACATCTCTTCAT
AUBES2009	TGTACGAGCTGAGGAGTGCT	CAGTTCTACTGTCCTGCATATCCT
AUBES2010	TTCCACACCACAAGGAAACA	CGCTTGGAGCATGAATTGT
AUBES2011	CCATACGTCGGTGCATCTC	AGATGGAATAAGTGAACCATCG
AUBES2012	AGGCATTGCAGCACTAAGGT	TGCCTCCAGATGCTAAACAA
AUBES2013	GATGCACCAATGTTCAAGGA	CTCGACAGCTCATCCATCTG
AUBES2014	TATGTGAACGTGGACCTGGA	TGATTGGCATGTCCAAAGTG
AUBES2015	TCTGCTACTTGCTACTGCTGCT	TGTCCTCTATCTGTGTGCCAAA
AUBES2016	GGTAAAAAGCCAAGCTGACC	CGATATGACGTCTCGATCCAT
AUBES2017	GGCAAACGACTAAAGACAAGG	AAAGCGGGCGTTTCTTTTT
AUBES2018	CCTTCCCCCTCCATTACAA	ACCGCGACTCAAGAACAAAA
AUBES2020	CCAGTTACCTGCCGAATCAT	CTCCGTCTATTGCACTTCAAA
AUBES2021	TACAGCGGCCTAAAATCCAG	TGGGGGATGCAAACTTTTTA
AUBES2022	AAAAACCGGTGGGAGATTTT	TGGACCATCACTCTTCCACA
AUBES2023	GCTTGGGTGCACATTACTCA	CGTCAGTTGCTGGGATTTTT
AUBES2024	GGGGGAAAGTGCTTTTATTCA	ACTGGTATCCCACCTTGCAC
AUBES2026	TCTGGTCACCAAGCCATACA	GAACTATTTCATGCAGCACCA
AUBES2027	AAAGGTGGACAATAGGACCAT	AAGAGAAGGTGCATGTGGTG
AUBES2028	ATTGCCTGGTTTTGTTGACC	GGAGCAGCCTGGTACTCACT
AUBES2029	TGTGAGGAATGCACCTGTCT	GGTAGAAGAAGCCCAAGGTTC
AUBES2030	CCCCCAGGGATATCTCAAGT	TCCGAAGCTTCATCACATTCT
AUBES2031	GAGCAGGTGGCTACTTCTGC	TATGGGTATGATGGCCAGGT
AUBES2032	CCACATCCGCATCATTTTTA	TGGCTTGCATTGTTGTTTTG
AUBES2033	GTGTGTGTGTGCGTGTGTGT	ACACCGTGGACGAGATCAGT
AUBES2035	TGGAATTTCACGTCATCTGC	TTTCGCAAACTTTCAAGCAC
AUBES2037	TGGGACCCACAAAAGAAAGA	GTACATGTTGGCAGGGGAAA
AUBES2038	ATCCGAGTCCCTGATCCAC	AAAACACAGACCTGGCAACC
AUBES2041	AATCCGCATTTCCAGTTCC	CTAACCAATCAGGGGTGAGG
AUBES2042	GGAAATTGGCAAAAAGACCA	CCGTGACCCTGAAAAGGATA
AUBES2043	TCTGAGCTCTGACCCCAACT	TTTTACACGTGACCAACCTCA
AUBES2044	GGCTGTGTCAATTGCAGAAT	GTTTTCGCGGTGCATTGT
AUBES2046	ACCAAAAGGCCTGGAAGATT	TTGCATCAGAACTGGTCAGG
AUBES2048	GGGAGGTAGGCTGCCAGTAT	GGGATGTTGTGCATGGTGTA
AUBES2053	CCCCTCTTTTTCTCCCTTTG	AGCTGCATGGGAAGAGATGT
AUBES2055	TTCACGACACAACTCAAAACTG	TTTGCCTCGTAGCCTGAACT
AUBES2056	GCCTGCTGAACGGTTTTATC	AGTGGCAGTAGTAGTGGCAGTAG
AUBES2058	GCACAACCGCTCTCTTGACT	GGTTTGCAATGAGGGTTGAA
AUBES2060	CCATCGCTGATCCTCCTCTA	TGAGACGGTTTATTAGACAGCGTA
AUBES2061	AATTTGCACGGGGTGTACTT	TTTGACCTTTTTCCCCCTTC
AUBES2063	TGCCATATCTTCTCCAGGTAA	ACCATGGAGCACTGGAAGAA
AUBES2064	AGTGAGGCAAAGGGAATGTG	GGGATGCACCCTAATATGAA
AUBES2065	GCTTCCAAATAACGTGCAGA	TGCACTTTCAGGATCTGTCG
AUBES2066	GTGAGGGCACTTTTCAGACC	TGGCATAATTTCCATTTCCA
AUBES2073	TAAACACTCCGGCCTCAAAC	GCAGCTAAACAATCAATGAGGA
AUBES2083	GAGCATATGAAACGGGGAAA	GGAGCTCCGGTAAAATCTTCA
AUBES2087	CTGCCTGCTCATCTCCAAAT	TCCAGACCTCACTCAGACCA
AUBES2088	TGTAACGTACCGAGCTGCTTT	TTGGCCTAAACCTGTGGAA
AUBES2090	TGCTTCCATTTTAACACTTTTCA	GCGAATACCTGAAACCTGGA
AUBES2094	TCATGTTGCCTTATTCATGTCA	TGCATATGATCACACGCTTTT
AUBES2096	CCCCACAACACTTTTCATAACC	GAAGCAGACGAAGAAGTTGTACT
AUBES2098	TACGCGATTGAGAAACGTCA	ACTCGTGCAAGAAGGAAACC
AUBES2100	CCAAAACTGGAGCATGATGA	CAACTTCAGGGCATGCTGAT
AUBES2105	GAAAAGGGAGGTGAGTGACG	TATGCTGCCGTGACTTGTTC
AUBES2107	GGGCGAAACTGTGAGAGACT	CCGCTGGTAAAATTCCTTCA
AUBES2111	TCAATTTATGCCTTCTCAACCA	ACGGTATACCCCGTGTAGTGA
AUBES2112	TGAATCTGTTTGTCAGTTTGTGC	TGAGCAGGTAAGTAAATAGGCAAA
AUBES2114	TTCATCTGCTGGTTCCAATC	GGTGAGCATCCTCCTGACTC
AUBES2116	GTGGAATTGTCCTCGCTGTT	GCTGTGCGAGTGTATGAAAGA
AUBES2118	GTATGAGGCCCAAGTCCAGA	TGGTTTACAGTGCAGGTGGA
AUBES2119	GTGAACAGACGGCAGGAACT	TTGTCTTTTTAATGCCCAACTC
AUBES2120	TTCGCTGTATCCGGTACTCAC	CATTTTGTGTCGAGCCTTCA
AUBES2122	TGTGTGAACGAGTGTGAAAGC	CCGTGCCGACGAGTTATAC
AUBES2125	ACAAACCCACAGTGCAGACA	CGATGTGAAGTTCAAGAAGGAA
AUBES2126	ATTCCCCAAAACTCCCATTC	AGGGTGCCAGATCCTTTTAG
AUBES2129	TCATGTTCTCCCTGTGAAGAGA	GAGAAGCCATACTTTTGCATCA
AUBES2130	CGTGCGCTTACTGAGAATGA	GGTCAGGGGCATGCTAGATT
AUBES2131	CCCCACTGAAACTATAGGAAC	AAACCCACATCTTCATTCTGC
AUBES2132	CCCCTACATTATTGGCCTTG	TGCAGGATGCCTAAAAGATG
AUBES2134	ACATGACTGCATGCATAGCTC	CACACTTTCCAGTGTTTTTGGA
AUBES2143	TGATAACTGCAGGGTTGTGC	ACCCTTCCACCCACATACAA
AUBES2144	CACACTCAGGGGGAGAAGAA	GGAAGCTAGAACCCTTAACCA
AUBES2145	ACCCTGCCTCACACCATTTA	AAAAAGTGAAGCGCTGTGAA
AUBES2146	TAGAGCAGGTGAAGCCATCC	TGAAGTTCAAGTTGCTTTCCAG
AUBES2149	TTGTTACCCTGGTATTTGGCTA	ATGGCCTTGTTCATTGTGTT
AUBES2150	CAATTGCAAACACAACACAGG	CTTGGCAAAGGGAGGTAGC
AUBES2151	CAGGGTCTAACTTGTTTGACAGA	CACGCCGACTTTTTATTCCT
AUBES2153	CCCTCATTGAGTTGGAGCAT	GGAACGGGACTGTTGAAAAC
AUBES2154	TTCCCAATTACTGAGTCCCCTA	AGAGGCATCCCCCAATATG
AUBES2155	TGCCCAATAAGAACATTTTGA	TCTTGAAACATAACCGCCAAT
AUBES2157	CATCACGGTAGGGAAGGAAA	GATCTGAAAACCTGCCCAAA
AUBES2160	TCTCACATATGCAGTGAAAAGC	TTGCCAAGGAGATGGAGAGT
AUBES2161	TGTGTATGCATGTTGCCTGT	TGGACTTGCGTTTCAACACT
AUBES2162	TCATACTCGGGGAAACAACC	TTTCAGGCAGGTTCTGAGGT
AUBES2164	GCGCGTGTATGAGACAGAGA	GCTGTACAGAAGTAGCGTAAGTGG
AUBES2171	CCACCACTGAAATCACCATT	CCACCACTGAAATCACCATT
AUBES2172	TCTAACCCAGCACTGCCTTT	GCAAGATCTTCACATGAGAAACATAA
AUBES2174	TGGCCATACTTAGGAACTTATTCAG	CCTGGAAATTTGCATGTTCA
AUBES2175	CACGGAACAAAAAGGAGTGG	TGAAAGAAAATGCTGAAATGGA
AUBES2177	CAATTCGCCTATAAACAACAAA	TGGGAGTCGTTTGGATCTGT
AUBES2178	AAAGTGATGGAGGGATGACG	TTTGTCAAGCCTTTGAGCAC
AUBES2180	CCATTCTCATGCACAAAAGC	CACCTACCAGAAAGGTGAAAGG
AUBES2181	TGAGAAAAGGAAGCTCCTCGTA	TTTTGAGGACTGAATTAGGGTACAG
AUBES2183	GGCCTTGGTCTGAGTTGGT	TTGGGATGAACTGCTGTGAG
AUBES2184	CCTTGAGCTCAGGAAAAGCA	TTGGGATAGATTGACTGCTTGA
AUBES2186	ACAGAGTGCCAACCCATTG	CCTCCTCCAGTCCAAAGACA
AUBES2187	TGGAAACAGTGCGAGACAAC	CCACAATTGACCCATCCATTA
AUBES2188	CCAAGGCTGAATTTGAAGGA	CACTTGGTAACCAGCCCTGA
AUBES2190	CCAAGCATGTTTTGAATTTGA	CAAGTTCGGAAATGTGAAGAAA
AUBES2191	TTCTCACTCAGGTGTGGGTTC	GATGTCTTGCTGGAATAAATCG
AUBES2193	GGCTCCTTGCAGAAACAAGA	GCAGGGTGTAATTTTGAACCA
AUBES2194	CCTTTCCAAATCCTTTTGAGG	CGATGTGCTGGCATTAAAGTT
AUBES2196	TCCTTCACAAACCCCAGTTC	TCTGGGCATCTCTCCTGATT
AUBES2199	ATCGCAACGACCAAAAGAAC	ATGGGTGGTTAAACGTCAGC
AUBES2201	TCATGCTTTCTCGCTACTATGG	GCTTTGAGGCCACGTCTTAT
AUBES2202	ACCTGTCTCGTGGATGTTCC	CTGTGGCATCAATCAAATGG
AUBES2203	GGAATTCCCGGAAAGGTAAC	CGCAGATATTCCAATGTCCA
AUBES2206	TGTTAGGAAGCCTACAGAAGGA	AGCCCAAATGGCAACATAAG
AUBES2207	TCAATACAAACATCCCCCAAC	CCTAATGAGATTTGGCAGCA
AUBES2208	CTCTCGTGCAGTTTTGTCCA	CCTAAGAGACCTGTCTGTGTGC
AUBES2209	TCTGGTGTCTCAGCCAGGAT	TGATCCGAAGATCCCTCTGT
AUBES2214	GCCAATGCACACCTCATTTT	TCCCACACCCTTCAAGACTC
AUBES2215	TACTTGCCCGCCCTTGAC	CGGACATTGACAGATTGGAA
AUBES2219	CACCAAATGCCTTCCAGTCT	TTTGGAAGCAAAGGTGAGAGA
AUBES2220	CTGATTCACCCGAGGAAAAA	ATAAAACCACGCAGGAGGAG
AUBES2222	TCCCTCATACCCTCCCTCTC	TTTACTTGCATGGCCAACAC
AUBES2223	TCATCCATCCTTTTGCCAGT	AGCCAGTCTGAACGTTTGAA
AUBES2224	TGTAAGCTGTGTAGCCTGGTTC	TCAAAGACACTGCCTCCATTT
AUBES2225	GAGGACTACGGGGTAGATGGA	TCTCTCACAATAATGTGGTCCAG
AUBES2226	TGCTGCTCAGCTGTTCCAT	CTGGCAGTGACAGCTCTTTG
AUBES2229	AGTGTGGTGTGGTGTGGTGT	CTGAGGTGCAGATGATGATGA
AUBES2230	GGTTTTACCTGTGGCCTTCA	CCCCCATAGTCAGCTCTTTC
AUBES2231	TTCCTCCTCTGGCTGATACTG	GTGTGTGCGTTTAGGAGTGC
AUBES2233	TTGGCTGACGTGTTCAATGT	TCAAGGACGGACTGTCTTCAT
AUBES2236	AATCGTTCGCAGATTGTTGT	GATGCTCCCTGGAAGAGACT
AUBES2238	GATGGCTAGTTAGCGCCTTG	AAGCGCTTTACACTGTGTCTCA
AUBES2239	GCGATCGTATTCATCATTGG	TGGGTCACATTGAACTGTCAT
AUBES2240	CATGGGGAGAACATGCAAAC	ATCACATTCTCCTCGCACCT
AUBES2241	GGAGAGGAAATAGGGGGTCA	GGTTTTGCTAGCTGGAGCAC
AUBES2242	GAAAACCCAAAGGGGATGAT	TTTTAGGGCACCAAAACCAG
AUBES2243	TACAGCAGAGGAGCTCAGCA	CCTTGTCCACTGAGACTTCCA
AUBES2244	CTGGTCCTTTCATCCATCAG	GGATGTCTGGATGGAAGCTG
AUBES2246	GGTTTAGGCGCTGTAGTCTTC	CCCACATGCTCCAAATTCAT
AUBES2248	TGCACCTGGAGTGAACTGAA	TGGACGACAGCCTTTAATGA
AUBES2250	CTGCCTGAGAGCAGGAGAA	GGCATGCAATCTTACAGCTC
AUBES2252	TCTGACTGTGGATTGGTGGA	TCGACCTTATTAGACCCTCGAT
AUBES2253	TGGCATTGGTACATTCACTG	CCCACATGTCCAACGCTAAT
AUBES2254	CCCGTGACTCTGAAAAGGAG	CGGTTCAGAAATGGACTAGCA
AUBES2256	CACCAAGTATCACATCCTGCAT	TCCCTTCTCTGAACCTCTGAA
AUBES2259	GTGGGCACAATTTTCACAAA	TTCACACGATGTTGTTGCAG
AUBES2261	GAACATGACACGCTGTGCTT	GCAGCTGTAAACAGCCATTC
AUBES2262	GGGCTGCCCAGTACAATACTT	GATTCCTGGAGGCTTTTGTG
AUBES2264	GAACCACTGTCTTGCAATGTG	CCCCTAGGGAACCTGAACAT
AUBES2265	CTCCCAATGGCAGGCTAAC	TTTCCCACTCACCCATTCAC
AUBES2270	GCGCAATGACAGCTTAAACA	ACACCTGGCGGCATATTTTA
AUBES2275	GAACGCTGCATGGCAGTAG	CCACGTATTCCCCAAGTGTC
AUBES2276	CCGGACTCCAGAAAGAGACA	ACTTGATCGATGATGGCTTT
AUBES2278	GGATTAGGCGGACATTGACA	CCGCCCTTGACTGTACGA
AUBES2280	AGAACCATGTGCCCAAGTCT	CATGGGATTTCCTAACATCACC
AUBES2281	CTGAACGGAACTGAAGCACA	TTCATGACATGGCTGTTGAA
AUBES2282	CAGTGGGACACAAAATGACG	TTTTGCGCTCAAGTTCTCCT
AUBES2284	TCCTAACATGATTTCCACTGAGG	GGCTGGATGTGTGGAGTTTT
AUBES2285	TCATTCTGTATGCCAAGTCTGC	CGAGCTGGATCATTTTGGTC
AUBES2286	CACGACCCTGAAGAAGGAGT	CAATGTATTTGGGGCAATGA
AUBES2287	GCCTTTCTTGCTGCTGGTAT	GGCTTTGACCAAGCTTCCTA
AUBES2288	TGCACACCCGAGCAGGTA	GTAGCACGCGCTCACAGAT
AUBES2290	GCCTGCTGAGGGATATTCAC	CCTGATTCAGCCGATCATCA
AUBES2291	AGCCCTCTCCATGCATACAC	GGATCTTCCCAGCATACAGC
AUBES2292	TGTGTCACCTGTTCCCTGAG	GATGCATGTCAACAGCGACT
AUBES2293	CATCAGCTGAATCCCTGTCA	GCTCTCAGTGAGGGTGTTAGC
AUBES2294	TGCATGCATAGGAGTTTTGG	GGACCTCCCGTTTTAACCAT
AUBES2295	GAATTCTGTGCTGCTGATCG	CTATGGCCCAGGTAAAGTGTG
AUBES2299	AAGGCCAGGTCAAAACACAC	TGCCAATGAAAGGTCCTCAC
AUBES2302	GTGGCCAAAGTGCTGAAAGT	GTAGGCCTGGCTTCCTTTTT
AUBES2303	TGTTTAGACTGCGGCAGAGA	TCCTGCAGGTGCTCTATGAA
AUBES2304	CCCTGAAAACAGAGCATTCC	TGTCGTCAACCTCAGCAGAA
AUBES2305	CATTTCCAGAAGGCCAGAAA	CGCTAGGCATTCCTAACATAGC
AUBES2307	AGCACTTGCATTGGAAACAT	CAAATTCACCCCAAATGGTC
AUBES2309	GGTTTGGGAACTGTTTCAGC	TGGGATAGGCTCCAACCTC
AUBES2313	ATGGAGGTCCAGGCTTCAG	ATTGCCTCTCCACCTGCATA
AUBES2315	AGGGCAGACCAAAGGTTAGA	CCTGGCTTGCTTTCTCACTC
AUBES2317	AGGGAGAGGGAGGGACATT	TACTCAGGGAATGGCCACAT
AUBES2319	CCTGTCAGGGGTAGGAGACA	CAAACTGCCCCAAGGAATTA
AUBES2320	GGCCAGTGTCGCTATGACTT	CCCAGCACTGAGGAAAGAAA
AUBES2321	GGCGTGGCTAAGGAAAGAAT	AATCATCCAATGGGGATCAA
AUBES2322	GGGGGTGTGCGTCCTTTA	CACACGACTCGTACCTTGATTC
AUBES2323	TGTGGCAAAAGCTTGTTCAG	TGCCCTAACCAAGCAGACAT
AUBES2324	CTGGGATAGGCTCCAGGTTT	GCTTGGGGTGGAATTAACAA
AUBES2325	AAGGCTGTGTCACCATCACA	GCATGAGCGACATGAACTTG
AUBES2326	TCTCGGTCAGACGACTGCTA	TGAGGACAGGTGTTGATTGG
AUBES2328	CAGAGAAACCTAGCCAAAGCTG	ATCTGTTGGGGAGGGCAGT
AUBES2329	GAAACTGCTGACCTCCTGAGA	TGTTCCCACTGAAGCCATAA
AUBES2330	TCTCTGGTCGGTTAAGACCAA	TCTGATAAGCGTGAGCGGTA
AUBES2331	GAAACAATATGCACAGGCACT	CTTTAGGCCACGCATAAGGA
AUBES2333	GTGCCGTGCGAGTAAGATT	CCCATGCAAAGTGTGGAAAT
AUBES2334	ATCGCTGGAAAATGAGATGC	CGACTCTTTGCTGAGTTGGA
AUBES2336	CACAATGTACAGCTTCATTTCGT	GCGTGTGTGTGTGTGTGTGT
AUBES2338	ATCGCGATCGACATATTGG	CGCACGCACAGAAATTCATA
AUBES2342	CCGGTCGATCAGTTACCTTC	CCCCATCATGTTCCTAAACG
AUBES2345	CAATTTTCATGTGCATTTTAAGC	TCGCTGCAATCCTGTACAAA
AUBES2346	CAGCTCAAGGGTTGTCATCA	ACCCATTTACTGCACCCTGT
AUBES2349	GACAAAACAACCCGCCTTTA	TTCCCCTTACAGTATTGCGAGT
AUBES2350	ACACATGCACACATGCACAC	TTTTATTTCCAAGCAATTGATGA
AUBES2359	ACACGCACACACACACACAC	TTTTATTTCCAAGCAATTGATGA
AUBES2360	CAGGTGACGTGGCAATTAAA	TGGGGTGTACTCACTTTTGTG
AUBES2361	TCTGAGAAACGGGATTCCAC	GGCCATCTGTGAGGTATCGT
AUBES2363	TGCAGGAATCCTTTCAATGC	TGACCCTGCTTGGATCAGTT
AUBES2364	CAGGCCAAAGTACCTTGCAG	AGCACATATGCCAAAAGCAA
AUBES2365	CAGGCAGAGAGAGAGAGAGACAG	TGTGTGTGTGTGTGTGTGTGTC
AUBES2370	TTGACACACGCTCAAACCAT	ACCCACCCTCCATACTGTTG
AUBES2376	TTCCCTTGAATCTTTCATATGCT	CACCTGTCAATCCACTAGACTCTT
AUBES2377	TAGTCCCATCTGCCTGCTTT	GTTATGCAAATTGGCCCTGA
AUBES2380	GGGAACCCTGGAGTCTATCC	GCATGTCCAAAGTGTCCGTA
AUBES2381	GCTTTGTACAATTGCATTTCTTTG	GTGGGTCTAGAGCCTTGTGG
AUBES2382	GCCCTTCCAATGGAGAAATA	ACTCTATCGGGCACGTCATC
AUBES2384	TGGCTTGGCCCTCTTATTTT	CATGCTCGGTGTCTGAAACT
AUBES2385	GTGTGATTCTGGGCCATTCT	CTGCTGCCATTAACCAGGAT
AUBES2388	TTCTTCCCTCTGCTGTTTCC	ACTGCATTGGCTCCCAGTTA
AUBES2390	GTATCTGTGCATTTCCTGCTG	GCCTTCTATTGGTGGCATGT
AUBES2393	CAGGAACCCATCAAACCAGT	TAGCTTTCTGTGCCCCACTT
AUBES2394	GGGAACCAGTTCCATTGACA	TGCTCAAAAAGACAGTGGTGA
AUBES2395	ATATCATCCCAACGCCACAT	TTTTCAAAAACAGCCCCAAC
AUBES2396	TGCCAAGGATGTGTAAGCTG	ACAGCCTGTTGGCAAAAGAT
AUBES2405	CTTCGCTGGGGTGTTCATAC	TTAGCCAGAAATTGCGAAGA
AUBES2407	TGTCATGCATATCACACCAAGA	TTGACATTACGCTGGCAAAG
AUBES2408	CACAGGCACTTGCTCAAGAA	CAGGTGAAGCAGGAAACTCC
AUBES2409	CGTCATTCGTCTTTGTGTGG	CAACAGCTGATTCCCCAGAT
AUBES2410	TGAAGGGGACCCAATCAAT	TTCCCATTCAGTCTCCCAAC
AUBES2413	GCAAAATGCAAATGCTGTTC	CGAAAAAGGGGAGGAAAACT
AUBES2414	GGGTGGAGACAGACACACG	AGAAGAGCCCCTGTTTCACC
AUBES2416	GGCTGAGTCATCTGGTTTCG	TTTCGTTTGTGCTGCTTCAG
AUBES2426	GTGTGTTTTATGCCCCAAGG	GGTGAGACAGAGGCCATCAT
AUBES2428	GAAATCCTGGCTGGACAAAA	GTTCCCTTAAGCCAACACCA
AUBES2429	TTCGCAGACAGGAAACCTCT	GCATGCGCAGAAGCTGTAT
AUBES2430	TGCACGGACTATCAGCTGTC	GCCAATAATTGTTGCACACC
AUBES2432	CCACAATGATGCAAGGGTAG	GCATGCAGAAATGAGTCCAA
AUBES2434	TGAGAAAGTGGTGGCAATGA	CCCTGATGACTTCGTGTCCT
AUBES2435	CTGGATTTGGGAAACTCTGC	GGGTGGAGGGTTCAAAGAGT
AUBES2436	CCATTATCCGCAAGTGGAAG	TCCAGTTTCCGCTAGCATCT
AUBES2439	CCCATTCTTATCGAGGCAAG	GGGATAGGCTCCAGAAAACC
AUBES2440	AGGCGGAAGTTAGCAGTTCA	CGGGTAAATCGAGACAAAGC
AUBES2441	CCGTATAGTGATGGCAGGTG	ACTTTCGTGCCCACACAGAC
AUBES2443	AGAGATAACCCACGTGTCCAG	TGTGTACAGTTGCATCCATCC
AUBES2445	GCAGAACTACAGCCATTCACA	GGGCTGTGAGAGCGAGATAG
AUBES2447	TCTGACCCTGTTGTCATGGA	TAAGCAGCCGTTTACTGCAA
AUBES2449	TCTAGGCATGGTGGAGACAA	TCATGCACTGTGTAGGCTGA
AUBES2452	TTTGAGGCATTTCTATCTACCG	CCTGTGACCCTGAAGAAGGA
AUBES2453	TGTGTATGCCTAGACAACATGG	TGAGAGTGCTGAATGACAGGA
AUBES2455	TCACCCAAGAGCATTTCCTT	GCTTTGGTACACAGGGCTTT
AUBES2458	TGCATTCATGCAAAAAGCAC	CAGACCACAGGTTTTCAGCA
AUBES2460	AGTGCGCAGTCTGTGCTG	AAGACACACAGGAGGCCTTG
AUBES2461	CCCTTCTTAATGAACACTTGATTG	CAGGTCTGGCACCTACACAA
AUBES2464	TTGGTCAGTGTCGGTGGAC	TGTGGCTGAATGTGACCTGT
AUBES2465	TGGATCAAGGAGATCTGTGG	GCAACACTGAAGCAAAGGTG
AUBES2470	GGCTAAATTTGACCCAACAA	CCTTTAAGGACCATTGTAACTGA
AUBES2471	TATTCAGCTCCCGAATCACC	TTATTTTGCGCCAACTTGC
AUBES2473	GCTGTTAAGCGGAAAAGCAC	CGTTCCATTTTCCAACTGCT
AUBES2474	TGAGAGAGCATGTGTGATTGC	AGGCCTACTCGTTCACAGGA
AUBES2476	TGCAAGAAAGCAACAGTGAGA	CAGCACATGCAGTCACACAC
AUBES2482	GTGATGCCAGTCATTGTTGG	GTCCTCCCATTGGGTTTTCT
AUBES2483	TGTCACAAAAGCTTGAGACGTT	TTCGGAGACCCTGTCAGACT
AUBES2486	TCCCCCTGTGGTTTTCTATC	GCTGTATGTAGAATGGGCACAA
AUBES2487	CAAACCATGCCTGAAACCTT	GAGAAAGAGAGAGGGAGAGAGG
AUBES2489	CATCATGCACTCGCTCACTC	AACCTGCGCTCATTATCTTCTC
AUBES2493	GTGCCCATGTGCCATTTTTA	CACCCAGGCTGTTTACCAGT
AUBES2494	TTCGCAGTTCTGAGTTAACGA	CTGCTGGCACTGAATCTGAG
AUBES2495	AATGCAGGTGCAGAGACC	CTGATGGAGCTGATCGGTAA
AUBES2496	GCCTGCCATCAGAACCTAAA	ACAACACCGCTGTTCATTTG
AUBES2500	CCACGATCCTGTGTTGGATA	TGCAGGAAGTAGGGGAACTG
AUBES2502	GGGCAGCTTAATGGTCTTTC	CCAATGAGCCCTTATAGAATCC
AUBES2503	GTGCCACCATACAAGATCCA	CCACCTCTTCTGTGAACACCT
AUBES2506	CCCAAACTTTCTCCCCACTT	TTTGACGTCCAGGATATGTCA
AUBES2507	AAAGCACTTGATCCAGCACA	TGAGTAGCTGACAGTGCATGA
AUBES2514	ACCATAGGGAATGACAGCAC	CTCCTGCTCACACAGTCTGC
AUBES2515	TGCTAAAGGTGGCACAAACA	GACCGGCGTAAACACACAAT
AUBES2516	GGCTGAAGGTTTAATCCCAAA	GATGGCTGCATGGAACTTTT
AUBES2517	GCTAGCTGCAGCATTACCAT	CAGCTCCTTCCCAGACAACT
AUBES2519	TCAACTCAGTCAGCATTTTAAGG	TCTTATGTAGCTTCTGAAAGGCATA
AUBES2521	GGCCCTTTAAGGAATGATGA	TTGGCACCCCTATGAATTAAG
AUBES2524	GCCGTTTCATTATGTTGTCC	CACCCTAACCAGGGTGTCC
AUBES2527	TCCAGAAGGTGTGCACTGAC	TTTCAGGCAGGTTCTGAGGT
AUBES2528	CCATGCTGTTGCACCTAATG	CCCTAACCGCTAATCACCAG
AUBES2529	AAAAGCAACCTCTGGCAAAA	AAACCCAAAGGGGAATTCAA
AUBES2531	TTGGACTCATGGTAGCACAGA	TCCACAACTTCACAGCATCTTT
AUBES2534	GTGTGTGTGAGAGAGAGAGAGACAG	AGCTGAGGAGTGCAAACACA
AUBES2537	CTTTGCATCAGCACTGGACT	TTCAGAACCTTCACCCTGATG
AUBES2539	GCTGCTAAAGGTGGCACAA	CAGAATCCCGGACCTTTTCT
AUBES2540	TGCAGGGTACAAACACTTGG	TGCAAGTTTTAAGAGGAATCTGC
AUBES2541	AAAGTGCATCGCATCCTTCT	GATTTGGGGATTTCATGTGC
AUBES2542	GAACAGGCCCCTTTTGAA	AGAATCCATGCTGAGCTGTG
AUBES2543	TAGATGTGGTGGGTTGCTCA	CCGGTATGTGGATTGGTCAC
AUBES2544	CCCCAATTTTGCAAGTTGTC	CAGACAACCACACACCCAAT
AUBES2545	TGCTTCTGATGATGGGATGA	TCACCACGGTTGTAAAGAATGA
AUBES2548	CACGGTATATAGGACCGCAAA	AGAGCCGGGCAATATGATG
AUBES2552	GGGATTGTGAAGTTGAACAGC	GCCCTTCTGCAAGGTTCTTA
AUBES2554	ACATGGGTGATAGGTGTTGGA	TCTTTGCTCCATCCTGATTTC
AUBES2556	TGGAAAAGCTTCCAGTGACC	AGCGGGACTGTTTTTGCTTA
AUBES2558	GAGGCTTTCAAAGGTGGTCA	CGATGTGTTCGTCACTCCTG
AUBES2560	AGAGCCTAGGTGGTGGAATG	CCCGATAGGTCACGGACTAA
AUBES2568	GGCATGAATCAGGCACTTG	TGACGGGAACGTCTAAATGG
AUBES2569	ACTGAAACGCACGACTCCTC	CTGGCCGACAGTTTGTAGGT
AUBES2572	TTATGCTTTGGGGGAAAAAG	ATTGGAAGGTCCGCACAAG
AUBES2573	TTCATGAACAAAATGCACTGG	TGTAACACCTTCTGTAATACCAACA
AUBES2574	GGCCAGAGTTTGGGTATTGA	GCTGTTTAGGGTGAATTCCAAG
AUBES2575	CGAGGAGGCAGCTCTCTG	TCATTCACTTGGTGCTCCTG
AUBES2577	GAAAATGAGGCGGTACCAGT	ACGCCAGATCATTCTTACCC
AUBES2584	ATGGTTTTGTTTAATCCCCTACA	GCATCGTCGCTAACCTTTGT
AUBES2585	ACCTGGCAACATGTGAGCAT	ATCACCAAAACGCAAAAAGC
AUBES2586	CGATTTTCCCAGACCACAAT	CCTGTGCCCTTTCAATGC
AUBES2587	TGTTGATGAGAGGGGAGAATG	GGTGCCAGACAGGATGGAATGAG
AUBES2589	TCTAAAAGCCCAACTGTTCCA	AGGAGGAGAGCGGAGAACAT
AUBES2590	CCAGCGTTAATGGGAATCAG	TCTCAGCCCATACCACACAG
AUBES2598	ATGTGACTCGGCAAGGCTTA	GAATGGAGCGGTGAAGTGAG
AUBES2614	TTGGAAGGAGTCTCCAGTGTC	TGCAGCTACAAATTGCCAGT
AUBES2626	CTTGCAAACCCTGGTGATTT	TCGTCCCAACTTCAGTCCTT
AUBES2628	TCCAGTCGTTTCATGTAGTTGG	TTGATCATCTTTTGGTCAATTGTT
AUBES2630	GGCCACTGTAGACCCTGAGA	CCTTTCCCAGGGAGCATC
AUBES2631	GCACTCTCAGTCACGCTTTCT	GGGATGAACTTCAGGACAGG
AUBES2633	AAAGTCGGAGGACTTTGTGC	GTGGCGCAACACTGAGTATC
AUBES2640	TCTGAAAAAGGGTTCGTTGAG	AGCATGCCTTTTAGTGTGCT
AUBES2643	CAGGGAGAACCAGAAAGCAG	AGAGGAAACCTGACCCAACA
AUBES2644	TCCGTTAATAATCGGCTGAG	AGTCGCTTCCTAGTCGATGG
AUBES2646	GGCTCAACACATGCCTTATG	GGATTCTCTGCAGTGCCAGT
AUBES2647	GAATATTCCAGGACAGGCTGTAA	CAGTGTCAGCATGGTGTGTG
AUBES2648	TCAATTTGTGACCTGCCAGT	CCTGTGATAACCAGCGACCT
AUBES2649	TTCTGTTATCCTGACCGTTGAA	AACCGGAAGTACAGCACAGC
AUBES2652	TCAGGGCGAAGCAGAGATTA	CCCAAGCTGACTTCACACAA
AUBES2653	CCAAGCTCAGGACCGAACTA	AACCTTTGTGCCTGTTCAGC
AUBES2654	ACCGGACACCAGCTAACTCA	TGTTCCCAGGATAGGCTCTG
AUBES2657	GCGATTGTTGGCAAATTTCT	GAACTCGTGGGTGAAAATGG
AUBES2660	CAATGGCACACATGAACAAAC	GGGATTGGAGCATACGAGAA
AUBES2661	ACAGAGCGGAGAGATCCAAG	GAAACATCACCCTGGACTGG
AUBES2662	TTTTTGTCCCACCCACTAGC	CCCAGAGAAACAGGAAATGG
AUBES2663	CCACCCTGGCTTTTGATTT	ATCCCCGATCAACCACTACA
AUBES2665	CACCTACAGTCACCCCATCA	AAGTCACAGGTGGGGTCTTG
AUBES2666	CCATGCATGTCTTTGGACTG	CCCAAAGATAGCGGGTTGTA
AUBES2667	GTCAGGCAACATCACACCAC	AAAAACTAATTGCTCATTTCAATTC
AUBES2669	TTTTGACCTTGTGGGGACAT	CACACGCCACGTTTGTCTTA
AUBES2671	GTGATGCTGTAGTGTGGTGGA	GCATTCTTCAAGGTGCAGGT
AUBES2673	CCCCATCCTGATTTCTTCTG	GTGGACGGGTGTTGGATAAC
AUBES2674	CAGCTCTGGAGATTTTGATCG	TGTTGACGTGAACCTGGAGA
AUBES2675	TGAGGCGAACATGATAACCA	AAGCAGCACAGCCAAACAC
AUBES2680	AATGCAACAGCTCAGGAACA	TCCACCCTATCATTACCCTGTC
AUBES2683	GACATCTGTTGCGTGCTGTC	GAAAAAGATGGCGTCTCACC
AUBES2685	GAGAGTGTGTGCGTATGTTGTG	CCAGGTCCAGTAACGGAGAG
AUBES2687	CCAAGGGACATTAACCCTGA	TGTCAATGCCCAGATTTTCA
AUBES2688	CAACAGCCAGCATTACACTCA	GCTCCATTCACATTCCATCA
AUBES2690	CCCCAGTGTGGGATCAATAA	TGCAAATAAGATTATGGCACTC
AUBES2691	TGAGGGAGACCTAGCATCCA	CCGCCCTTGACTGTACGA
AUBES2697	AGCTATGTTGGCAAAGTGAGG	GCATTGTACTGCTGCCACAT
AUBES2700	ACGAGAAACCCTGTGAACAA	CACCACAGTTACCACACCTCA
AUBES2702	AGGGTGTCCCAAAAGTCTCC	CCCAGCAGCCTTCATTATGT
AUBES2705	CACATTGATGATGAGTGTTGGA	TTGCTCATGTGTGCTGTGAA
AUBES2706	AAAAGGTGGCACAACCAGAT	CACAAAACAAAAGCAACCTGA
AUBES2707	ACCTAATGCTCGCACTCGAA	CATGTGGTGAAGCTTCTCAGG
AUBES2711	TGTTTCAGAACAGGGATGGA	CAGGCTTGTGGCTTCAGAAT
AUBES2713	GTGATGTGAACTTGGCAGGA	TGGTTCAGGCTGTGGTTACA
AUBES2714	TTTAAGAGCCACCATCTCTGC	TGCACAATTTCACTCCTCAGA
AUBES2715	TGCACATGGCCATAAACACT	CCGAAGACACTTCATGTGGAC
AUBES2718	GCATTGTGGATGACCTCTCA	GGAGTGGGATGGTGTTCAGT
AUBES2719	TCTGCCGATGTTTTGTGTTG	ACGCCATGTACCGGTTTAAT
AUBES2723	ACTGCAAAAAGTGGCCAAAG	TCCCCCTGACTCTCGTACAC
AUBES2726	TTCACTGCTTTCCTCCAACC	GCCACATAACAGGACCAGTG
AUBES2727	TTGCACCTTTTCTTCTCCAC	TGCCAGTTGGAGTCTATTTCC
AUBES2728	AGGCGCCTTCAATAAATCAA	CATCGCACACAGAAATACGC
AUBES2733	TTCCCAAAGCAAACCTGATT	TGAAAACCCTATGGTTCGAAAT
AUBES2738	GGCTGTTTCACCCTTGCTTA	GCACAGATCAGCAGGAGACA
AUBES2739	GCCTAGAATGCCCTCCACTA	TTGTTGCACACCTATATTTAACAAA
AUBES2741	ACAGTGCATCCGAAGAGTCC	ATTGCACACGTGAGTGGTTC
AUBES2742	AGCACTTGCACTGGAAACAT	TTGTGCTGCTTCAGTTCTGG
AUBES2743	CAGAACTACAGCCATTCACAGC	TTGCTCCTTTATCCCTGTGC
AUBES2744	GGCACCACAGCTTGTATGTC	CAACAACAACCAAGTGAGCAA
AUBES2745	GCCGGGATTCAGAGAAAAGT	TTGCCTCCATAAACCCAGAC
AUBES2747	TGAGCTACAGAATGTCTCTCTCCT	GAGTGCAATCATGAATCACAGA
AUBES2757	GGAGCAACCTCTTCATGGTC	CCAGCCAATCAGAATCCAGT
AUBES2760	CTGAACGGAACTGAAGCACA	TTCATGACATGGCTGTTGAA
AUBES2762	TGCATATATTGCAGTTCAAGGAA	CGCCAGCGTAAACAGAGTC
AUBES2763	TCCCCACTGTAAGAACCATGA	CCCGCTCTTTTACCATAGCA
AUBES2765	GCTGCGTTTATTACAATGGTTT	TTGGACCTCTGTTTTGCAATC
AUBES2766	CAGAGGTGTGAGGCAAATGTT	TGTGCCCCTTAACTCAAACC
AUBES2768	TGCCATATCTTCTCCAGGTAA	TGCATCACAGCTTCACATCA
AUBES2771	TGAATGGGTGTGTGAGTGTG	CCAGGATGCTTCTCTCCGTA
AUBES2774	ACCGCTTGAGAGAATGACCA	CACACCATGTTACTATGATATGAGAA
AUBES2776	CACAGCACCACATGAGAGGA	TCCACCAAACAACACAAATCA
AUBES2777	CCTGAAGATCATGGGGAGAC	CGAGCGCTTTCTAACAGTCA
AUBES2780	TGTCCAAGAGTTGGGGAAGA	TGTGGGATCCACACTACTGC
AUBES2781	TGGGCAAAACACAGAAACAA	CAACGAGGCACTGTTTCACA
AUBES2782	TTGTACAGTATTGTCATGGGTCTG	AAATCTATGCCCTGCACTGG
AUBES2784	TCTTACGAGAGGCGAAGGAA	TGTCTCTTCTGTTCCCAGGTG
AUBES2785	GGGCTCCTGTCAATCCATTA	TGCTTGACTTGTAATAGCTGTGG
AUBES2787	TGGCTTTGTGTGTCTGGAAG	GGCGTTTTCTTTTAGCATCA
AUBES2790	CTCCAGGTCCTGCACATTTT	TCATTATGGTGTCGGGTGAA
AUBES2793	ACATGAAATGCAGGGACAGA	TCCGGTGAAAATATCATGTGAA
AUBES2794	TTTTGCTTGTCCCTGAGTTTC	TCACGTTTGTTGATCCGGTA
AUBES2796	AGCAGGGATACGAAGCTGAA	TGTTACGTTTTTGGCGTGTG
AUBES2797	AGATGGACAGACGGATGGAG	TTGTCCCTTTGACCATCCA
AUBES2800	CTGAGATATTCCTATCCTTGTAGGGAC	CACGAGCTGATTTGCAAGAG
AUBES2803	TTCAGCAGGATTTTGGGAAA	TCCTTGACACAGCATGGAAG
AUBES2806	CATTAGTAAAAATGATGGTGGACA	TCACGTTCCCCTACATCTCA
AUBES2807	TTGCCAGTTTTGTCCATCAA	TGGTTAATGGAAAGAGACCATG
AUBES2810	CAACAGAATAAACGGAATCATAAAGA	CACATGTTTGGACATGCAGA
AUBES2813	TGTCAGTCTCCAGTCGTTTCA	TTGATCATCTTTTGGTCAATTGTT
AUBES2818	GGGAGAAAACGTGTCACCTG	TGCACTTGTGCTGAAGTCAT
AUBES2820	CCTGCAGTGGAAAGGTGTCT	TGACTATGTGGCTGATGTCTCC
AUBES2823	CATCATGCTAAGCAGCCAAA	GAAGCGTTCTGTAGGGAAGAGA
AUBES2825	ACCCAAGAACAGGCACAAAA	GCTGATGCGAACGGTAGATA
AUBES2828	ACTGTATTAGGCTACAGAGTGCC	CCTGAAACCTGGAATGGAAA
AUBES2832	ATGGCTCAACACATGCCTTA	GGATTCTCTGCAGTGCCAGT
AUBES2833	GCAGGGATATGCATTTTCTCA	CCAGATTTTCATTGTGGTCTCA
AUBES2835	TGACATCTTTATGACGCAGTATCA	CATCCCCAGCCTCAGTTAAT
AUBES2836	GTCAGCGAGCACAGTCGTTA	ATGGGGGTGAATGCAATATG
AUBES2838	GCTGCCATTTTGCTATTTGA	CATGAAGCAAAACAGGAGCA
AUBES2840	AGCCTATGATCGCAAAGTGG	ATGGCTGCACCTTCCTCAC
AUBES2841	CACTGCTTTGCTTCAAGTGG	TGGGCTGTCAAAATCGAATAC
AUBES2842	GGTCACACAAGCACATGCAG	TTTTAATTGGGCAGTCAGGTG
AUBES2843	GCACAGCGAAAGAAAGGAAG	CCTGTGAGAGCAAGGACACA
AUBES2845	TCTTGCTCTCTCCGGGTTC	TGGCTGCTCTGTTTTTAGCA
AUBES2846	GCTGTCAGTGTCAAAGGCTGT	CTGCGTGGACGTAGGAGTTA
AUBES2849	GGGCTCATGGATGACTGAAT	AGGTTTTCTGAGCAGGAGGA
AUBES2850	GGCAGGTCTCAGAGCATAGG	AGTGCTTGCATGTACATTACCC
AUBES2851	ATTTTTCCCTCCCATCCATC	CATGCATGGTAGGCTGATTG
AUBES2852	AAGTGCTTCATTTGGTTTCCA	GGTTCTGCAGTGGTTCTGGT
AUBES2853	AAGCAGGCTATGCGTAATGC	ATCCGGTGGTGATCCCATAC
AUBES2854	AAAGCAGGGCCCTTTACAAT	TAATCCACACACCGCCTGTA
AUBES2855	CTCGGTGGGTGTGAACTTCT	CACTTCCCTTTTCCATTTCC
AUBES2858	GGCTGACTGACCTGATGGAT	CAAGCTCTCTCTCGCTTGCT
AUBES2860	GCTGAACACTGGTTTTGCCTA	GGTAGGTGAGCGGTCCAATA
AUBES2865	CCCTCATTGCTTGTTCTTCG	ACGATCCTCCAGTTCCTCCT
AUBES2867	CCATGGAGCTCTGGATCTGT	CCGTTTTAACATTGCAAGACAC
AUBES2868	TGCCAGAGATCAGAATACCAC	TGACCAGCCATATCTACTTTGC
AUBES2872	GCCAACAATTTCCATGAGGT	TTCATGTCAGCGGTTCACTC
AUBES2878	GGGCTCTGAAACACACACAC	GCAACACATTTGCAGCATTC
AUBES2879	TCAACTCGAACTGGAGGACA	CATTCCATCAGCACCTGAAC
AUBES2880	CGAGGCGAGCTGGTTTAAT	ACCTCTTTTCCCGCTCACTT
AUBES2887	GCACACACAAGGTGGTAATGC	TCATTACTGCAATCACACATGC
AUBES2890	GCTCCCTCTTGTGTCATCTG	CCCTGATCATGTGTGTGAGG
AUBES2892	GCACAACATTCAGCCAAAAG	GGAAAGAATCCCACACCTGA
AUBES2894	CTTACAAGAGCGCTGCAATG	TCCCCAGTCCCTCTCTCC
AUBES2896	AGGCACTGAGAGGGCTGTTA	TTAGTGCAGCAACGCAGAAG
AUBES2901	GTGCGGTTTCGGTTAGCTC	GCAGCGTTTCTTACCTTTGG
AUBES2902	AACCAGAGTACCCGGAGGAA	GCTCCTCCTGCTAAAAGCAA
AUBES2907	CTGAGAGAAAAGGGGGTCCT	GGAAGGACCTCTCCATCAGG
AUBES2912	GTAAGGCGATCAGGCAAACA	TCAGACACGCCTGTTACCAA
AUBES2913	ATTAGCCCACCAAACACAGG	TGTGCATGTGACAGTCAGACA
AUBES2914	ACCCAATTTGTCGGAGAGC	CCCCCATAGTCAGCTCTTTC
AUBES2917	GGGTTCAGCAGGGAATGTC	CACCGTTTCCCTAAACTGGA
AUBES2918	CGAGTCCGCACACCTTTAAT	GAGCGGACATCACTCCTGTA
AUBES2920	AGAGCGAGAATGAGCGAGAA	TACCTCACATCAGGGGATGG
AUBES2922	TGCTGGTTGAGTGAGTGGAG	GTTCAGCGTGGGCAGAATAG
AUBES2929	GATGATCATGGCAGCTTCTG	CTGTGCACAAATCATTCATGG
AUBES2931	CCGGCAGAGCCTCTATAATG	CAGGATCCTCAGAGCCAGAC
AUBES2934	GGGAGGAGGCAAGGTTGG	GAACGATGGCCACCTCAG
AUBES2941	CCCACCCCATCCAGTTAATAG	AAAGGGGGAAACTTTGGGTA
AUBES2945	GAATAAAAGTCGGTGCATTTCC	TGGAGCCTACACCACTGAGG
AUBES2946	CAGCCAGTAGATGATGCTTTTC	TCAAAAGTGGCACATCCTGT
AUBES2947	TGAATAAGATGTAGGTGAATGTATCG	CCACTGGTGGATAATTTTGCT
AUBES2948	GCCCCTAATCAGGGAACAGA	GCCAGTGTGAGCTGAATTTG
AUBES2949	GCATTTTCTCATTGCAGTCG	CCAGATTTTCATTGTGGTCTCA
AUBES2950	AGGGTGCCAATAATTCTGGA	CCAAAGAACTAGTGGGAGGTG
AUBES2956	CGGGCTTGCATATTCTCTGT	CGCCCATACTCACTCATGC
AUBES2957	CTGGTTGCATTTTATTGAGTGG	TGCATTTCTTTCAGAGGGTCA
AUBES2959	GCCATTTTGAGAGACCTCGT	TCATTTGCAATGACTCTGAGG
AUBES2960	GCACAAGTGTGCCCTTTCTA	ACAGATCCTTATGACTGGTGTGT
AUBES2961	AATCTGCTCAAAGCAGGTGAG	TTTCACGTGTGTTCCGTGAT
AUBES2963	TGCCTGGCCTGTCATTTAGT	AAATGTAAGCGGAAGCATGG
AUBES2964	ACAGGGTTTCCGAGGCTTTA	GCATGCAAGAGCAAAGAAGA
AUBES2965	CATGGAAGGAGTCTCCAGTG	GCGGAGGAGTGTTTGATTGT
AUBES2966	GGGTCAGTGTATGATGTAGAATTTG	ACATGAGCTTCCACATGCAG
AUBES2967	TCACTTTCCTATGGCCTTGTG	ATCCACTCTGTGGTCGGTTC
AUBES2969	GATGGAGGAAATGGTTGGTG	TGGTGTCACTGTTCTGTCAGG
AUBES2970	ACCTGATGGACGTGAGGAAC	GAAAAGCGAGAGAGGGATCA
AUBES2971	CTCCTGGGCGAGTTAAGAGA	GCCAATAATTGTTGCACAGC
AUBES2972	GAGCAAATGGAGTGGAGCAT	GCTGTAGTGCTGACGCCTTA
AUBES2973	TTCATGTAATCCTTGGCCACT	GCATCTGAATGATGGGGATT
AUBES2976	CTACCATGCACACGCACAC	GAGGAACCTCGACAGCAGAG
AUBES2980	TTATCAGGGTCACGGTGGAT	CCCAAAAACATGCCAGTAGG
AUBES2981	TCACAGTGCACGTAGGCATC	TGGGATTTGACTACGATGAGG
AUBES2983	ACTGGCCAAACAGTGGAGAT	ACTTTAGCGTTGCGGATTTG
AUBES2985	TTTAAACATGTGAACCAAATTCTTG	CTGCGGTCGGAAGTTTACAT
AUBES2986	GGCTTTGCTAATCCTTTCCTC	TGAACTTGGGTTGATTCTCCA
AUBES2988	TGAAAAATCCCAAGGTTCCA	GACACGAGAGCGGATGTTTT
AUBES2989	CTCGCCTCAGTAAGCTGGTC	GCTTGACAAAGCCAACATTCT
AUBES2991	AAAAGCGGTTTACTGTACTTCCA	TGTACGAGCTGAGGAGTGCT
AUBES2992	CCCCAACTTGGAAACACAAT	TTTGTACGGTTTTCCCGTTT
AUBES2994	CCCAGCTCCTTTTTGTTTTG	AGCTGTCTGTGGACATGGTG
AUBES2997	ATGGCTCAACACATGCCTTA	TCGTCTCTGGTTCCTCTTCC
AUBES2998	TGAAGCACTTTGAGCTGCAT	ACCTGCAGGATTCAGGAGTG
AUBES3000	GGAGACATATTTGTGCCCTGA	CAGAGGCAAGGAAGAGAGGA
AUBES3003	TGCAATGACCTGAGCCAAT	TCTGATTCTTTGTGCATTGCTT
AUBES3005	GCACAGCTGCTCAGTTTGAC	TGAACATGCTTCAGGGAAAA
AUBES3006	TGGAGCTGAATGCCCTACTT	CACAGCCTAGTGTGACCGTACT
AUBES3008	CTGGCCAGTCAATTTTCAGC	TAGCTTGATGGTGGTCATGC
AUBES3010	TGTCCACAAGCAGGACTCAG	GGACCGTCATCCTCCTACAG
AUBES3011	AAGTAGCGCGTGTTGCTGTA	GTGCCTGGACCAGCTAGAGA
AUBES3018	TGTCACATGCCTATGTTGAGG	TGGTCCCACAAGGGAAATTA
AUBES3019	TCTGGTCACTGGTTGTGCAT	GGATGGTGTCAGTGAAAGCTG
AUBES3020	TCTGAGAAACGGGATTCCAC	GCTGGGACACTGAGGAGAAA
AUBES3024	CAGTTTTATTCCGGGTCACG	CCTCCCAGAAACATTCCAGT
AUBES3026	CGAGTAACTGCGTGAATTGC	CTGCCCTTCAGACGCTAAAT
AUBES3027	GCCACTAAAAGGGCTGAGAG	AGCCACTAAAAGGGCTGAGAG
AUBES3029	GCAGAATTTTTCCTTTATTATCCA	GGCAATGACCATAATTCCAAA
AUBES3037	CATGTGGTCCCTGCATTTTA	TGTGTGTGTGCGTGCATCTA
AUBES3039	TGCAAGCAACCTTTTAAATCTG	CAGCATTAATGGCGCACTAC
AUBES3043	AGGCCGTCTCATTGACAGAC	AGAATCCAAGCGTGCAGTG
AUBES3044	ACTTCCAAACCCATCAGCAG	TGCCATTCCTTAGCTTTGCT
AUBES3045	GCACGCTCTCGTACAGTCAA	CCCTTCTACTGTCCTACATATCCT
AUBES3052	CAATATCCGACTGTGTCAGCA	TAAAGAACGTTTGGGCACCT
AUBES3053	TTTCAAACGGATGCAAACTG	CAACTGGAGTGGAGGAGCAT
AUBES3057	TTGACGCGTTCAACCCTTAT	TCATGAAAATCCCATACATTCAG
AUBES3058	TGCCAAGACCATTAAATGAGG	GAGGGTCCACCTAGTAAGATATAAGG
AUBES3061	CCACCAATAGGAGGACGGTA	CAAAGCCGTCTGACAGGAAT
AUBES3063	GGTCCAGCAACAATTTAGCA	CCTTCTGCTTTTACTCTTATGTGAAG
AUBES3064	CTGTATCTGACTATATTGGCCTGAA	GGACTTGTGTGAAAATCAAATG
AUBES3067	AATCGCTGGGATGAAGACAC	GAAGATGGAGAGGCAGCACT
AUBES3069	CACATTGGTCATTCAGGCTCT	TGGATATTCCAGTCCGCATT
AUBES3075	GCAATGAGCGTTTCCTGTTT	GCCCAAACATACTGGCTACC
AUBES3077	GCGTCAAAGCTTCCTACCAC	AGTGGGAATTGAACCCCCTA
AUBES3081	ATGTGTCACCTGTTCCCTGAG	GAGGAACTGCTGGATGATGC
AUBES3083	GCGCCTCAGCTGATATTAAG	ATCTACGGAAGCCCTGAACC
AUBES3092	TCAGAAGCATTTGGTTGCAG	CAAAGGCAACCTGTGTAAGC
AUBES3093	GCCCCCAAATTACAAAACTC	CCCAGTGTGGGGTCAATAAA
AUBES3096	GGGCTGGTGGACTGTATGAA	TCGAGAACGGACACTTTCAA
AUBES3098	GCCTTCAGTATGCAGCCTTC	GGCGGGGTAATTTTCATACA
AUBES3104	GGAAGTTACCTGCAAAACACC	TGCTTTCAACAGTGTTTCCAAC
AUBES3106	CCTGGGGACAGGTACAGGTT	GAATCCATTGAACACTCACTTCA
AUBES3107	CGTCGCCACTGGATTAAGAG	CTCACATGACCATGCCAATC
AUBES3113	CCAAATATTCCCTGGGCTCT	AGTCGTGGAAACCAATGAGC
AUBES3114	GTCTGCGTGTGCATGAGTG	GTCGCCTCAATGATCCAGTT
AUBES3116	GCAGTTTGTAAGGTTGAAAATCG	GATCTCCAGGAACACGGTTG
AUBES3119	TCCAATGTAGCAATTTGACAGA	CCATGAGCTATAAGCCGTTATCA
AUBES3120	GAGTTTTCAATCAAGCCTTTCA	GACAGTTACTGCGGTGACACA
AUBES3121	CTGGAAGGGTGACCAAACTC	TGCCCTAGCCCTTTTAATCA
AUBES3122	ACCCCTGTGAACAAGTAGGC	CAGAGGCTTGAGCCAATGA
AUBES3123	GGGGCAAGGTACATGAGAGT	GATGACCTCCCGAGCTGTAG
AUBES3125	GGTAACGCGTGACGATTCTC	GAGGCAGGCTTGAAACAACT
AUBES3126	GCTCTCCCAGTCCATCATGT	GCTTTGGGCGTCTTCTTACA
AUBES3127	ATGCTTTGCCATGTCTGTCA	CCTTTGGGCATGCTTTCTAC
AUBES3128	GTGCCGTTTCATTATGTTGC	CACCCTAACCAGGGTGTCC
AUBES3129	AAAGGGCCGAGAGAAGCTC	TGCTGTCCTAAAGCAAATTCC
AUBES3130	TGCAATGAAGACAGTGCAAA	GAGATGCAGAGCCTGGAAGT
AUBES3134	TGTGTCACCTGTTCCCTGAG	GATGCATGTCAACAGCGACT
AUBES3135	ATGGAAAGAAGCCAGGAATG	ATTGTGCCCTGTGATGGACT
AUBES3137	TGCAGTTTAGCGTGTGCCTA	GCACATATTCACTGTCCATAGCC
AUBES3138	CCATGGGATTGTGAAGTTGA	CTGCAAGGCCCTTAACACTC
AUBES3140	CGAGTAACTGCGTGAATTGC	CTGCCCTTCAGACGCTAAAT
AUBES3141	GGGCTTTGATTGAATGCTGT	GGGCGAGTCAGGAGAAAAA
AUBES3143	TGGTGGACATCCTCCTCTG	CGTGTCCCAAATGTAGCCTAA
AUBES3145	CCTGAGGCCTGAAACTGAGA	GAAAAGCAGCCCAGTTCATT
AUBES3146	TCACACGGCCACATTAGGTA	CAGAAGGGGCAGAAGGTACA
AUBES3148	GAAGCGTGCCAATAATTCTGA	GTCTTTTGACCAAATATGAGAACA
AUBES3150	CGGTCGTAGTGAACCATGC	CTTGCTGAGCTTACGGGTGT
AUBES3164	TGGTGTTCACTTTATCCACAGC	GTGCTTTTCAGTTTCTCTGCAA
AUBES3165	TGCAGTTTAGCGTGTGCCTA	CCACCCATACTGTTATCTGCTC
AUBES3173	TCATATTGGTGAAAGGTGTTGC	TAGTTCACGTGCGCTGAAAG
AUBES3174	AAAGCGGTTTACTGTACTTCCAA	GTGTACGAGCTGAGGAGTGCT
AUBES3175	CAAAGGGTCGTCACACCAA	CCAAACGCATCCTACACACA
AUBES3177	CCACCACTGAAATCACCATT	CGCATGTTCCATGTTTTGTT
AUBES3180	GGGTGATAGATGTTGGGTCAC	AAGTATTTGCCCCATCCTGA
AUBES3181	TGAATGCACAGAGCAAGTCC	TGTGCCCAATACAGTTAAAGCA
AUBES3182	ACTGCTTGAAAAACGATTTACTG	GGCGGGCATGTAGACATAAT
AUBES3185	GGGCTAGAGCGGGATTAGAG	TTCTAAAGGGGATGCCTGTG
AUBES3186	ATGGATGCCAAATACGCTCT	GAATCATCCAGCAAGCCATC
AUBES3189	AAAGCATCAGGGGGAAAATC	CATGAAGCAAAACAGGAGCA
AUBES3197	GCATAACACCGGATGATGAG	GGCTTTGAAAAAGCAGCAGT
AUBES3202	CCCAGAGAAACAGGAAATGG	TTTTTGTCCCACCCACTAGC
AUBES3205	CTGAACAGCTGCGACAGAGA	AAACCAGCTCCATCCATCAC
AUBES3207	GCACAGCGAAAGAAAGGAAG	CCTGTGAGAGCAAGGACACA
AUBES3210	TTTTTCCATGGGTGACAGGT	AGGACATGCAGTGCTGTGAA
AUBES3211	GAACAGGCACCACACACAAC	ACATTTGTGGCCCTGATAGC
AUBES3212	CCAAACCGTTTTACACTGTGTCT	GTGGTAGAGCGGGTTATCCA
AUBES3220	TGTGCCCTATGATGGGTTG	ACCTTCTGCCCATTGTTCAC
AUBES3223	GGTCTGAGCATGTGGTCCTC	GACATAACGGAGGTGTTCTGC
AUBES3226	TCACAGTAATGCCTCAACTGC	CCACAGTGTTGTCTGAACAGC
AUBES3235	GCACAGACTGGCTACGACAA	CAAATCCGGATGTCCAGTTG
AUBES3236	GCCCCAACAGCTAAATTCAA	CTGGCCTTTCTCATTGTTCC
AUBES3239	GGTTTCTTGCTGCCTTTCAG	AAAGTCCACAGGCACATTGG
AUBES3240	GAGAGAGAGAGGGCGAGAGC	ACACGCATCCTATTCCAGGT
AUBES3241	GGAAGTTTATTTGAAAAGAGGTCA	TTGGCTTAAGTCTGTGGTGCT
AUBES3244	AGCACAGCCTTGGTTTGAAG	CAGGACCTAAACAGCCCTGA
AUBES3245	GCCAATAATTGTTGCACAGC	CTCCTGGGCGAGTTAAGAGA
AUBES3246	ATGGGTTTCCCCTAGTGCTC	TTAGCTGCTTCACCCTGGTC
AUBES3250	TCCATTAAAGCCTTCTGCTTC	TGTGTTTTGATGCACAGTGG
AUBES3251	GGACTCCCGGTATTCCTGTT	GGACATGTAGCGTGCCAGTA
AUBES3252	CCATGAAATTCCAAAAGGTTC	GGGCTGTCTGTTGGTTTCTT
AUBES3258	CCTGAAGATCATGGGGAGAC	CGAGCGCTTTCTAACAGTCA
AUBES3261	GGCAACCTGAGTAAACACACAA	AAGCGCAAAGACAATGATCC
AUBES3262	AGCACTGCCTCTGTATGACTG	GCACAACTGCAGATGGATACC
AUBES3264	TCGACAGGTGTTGGTAGCTG	TCAAGTCATTCCCTGGCTGT
AUBES3266	ACAAGATGGGCTGGTTGAGT	CTGGCCATTTTCCTCTGAAC
AUBES3267	GCTGCTTTGTGATGATGTCAAT	TCCATGATGGTTTTCAAGCA
AUBES3268	GTTGCAGTCGCATTTTCTGC	CAGTGATGTCCCAGCATCAG
AUBES3269	CCTTAACCATGAGGACTCTTGTA	TTGCACCCTTGTTTTGAACC
AUBES3271	AGCAGTGCACATTTGCGTAT	CGCAGAGGATGTAGTGGATG
AUBES3272	TGGAAGTCTAGGGCCATTTG	TGCTCACAAAGATGCTGTGG
AUBES3273	AAAAGCTGCGTTTATTACAATGG	GGACCTCTGTTTTGCAATCTG
AUBES3275	CATGTGCTTACTCTTTCTCTCTCG	TGTGGGTTCCCATGGATATT
AUBES3276	GCCGTGAGAAAAAGCACACT	TGTTGATGTACACGCAGCATT
AUBES3277	GCTCTTCCAATCAGCTGGAC	CCAGAGTGTTTCAGCCTCCT
AUBES3279	GCCTATCCATCATGCTTTGC	AGGCGCTGGAAATGGATATT
AUBES3283	GCAAACCCAAGGAAGTGTTG	CCTTGCTGCTACGTCTTTGA
AUBES3285	CTCAGTAGATCCCCCAATGC	TGAATGGGAACGCCATACAT
AUBES3286	AGGAGTCTCGGTGCACTAGC	CTCCATGTGACACGTATGGTG
AUBES3287	CCTCCAGCTCTACCCCTTTT	CTCGGCAGCACCTGTACATA
AUBES3290	AGGAGTGCCAATGGTAGTGG	CCACCAGCACATGCAAATAC
AUBES3291	CGTATCGGACTTCCTTCTGC	CTCTTATTGCCAGCACAGCA
AUBES3293	CAGCAATGTGAACAGGCTCT	AATCCATGCTGAGCTGTGTG
AUBES3294	GCAGCAAACAAAATAAAACCTG	CGTTTCTACGGCTCTTCACA
AUBES3299	GACCGGCATCTCAATCTTGT	GATCAGGTGACGATGCAAAT
AUBES3301	CTCACCGGGAGAAGAATGAG	CATCCCGGAAATGAATGACT
AUBES3308	TGTGCAAAAGTCTGAGACACG	CTTGCAGCTCATTTCCTTGA
AUBES3318	AAGAGGGAAAATTCGGAGGA	CTGGGTTTCAGAGAGGGAGA
AUBES3319	CAGGAGGAGCTGGACTCTGT	TCATTACCCAGGGTTGCATT
AUBES3325	GGGACAAAGGCAATTTGAGT	CAGCGCTGTGAAAGACTGAT
AUBES3330	GGTGTCAGGTGACTTTAATGTGATT	CTCCCATTCAATTGCAACAA
AUBES3331	TTGGATCTGTCAGCTTCGTCT	TGACCCCGACCAGAATAAAG
AUBES3332	CTCCGAGTTGTTTTCACATTG	TTGGTCCCCTGGAGTTTGTA
AUBES3333	CAGGTCAGGTCAGGTCAGGT	CAACCTGGCACCATTATTCA
AUBES3334	CACAGAATGCCATGGAGAAA	CTACCAGGAGCCTTGACTGC
AUBES3337	CATCAGCATTTCCTGAAGATCA	ATCCGTGCTAATGCCAGAAG
AUBES3338	CCCATATTGGAGGAGACCAG	CATTCATGTCCATACCTGTCC
AUBES3339	AAGAGTGTAGGTGGACGGTCA	CCCCTTTTCTGTACCCCATAC
AUBES3343	GCCGCAAGATTTTTCCAAT	ATACCTGCAACCTGGAATGG
AUBES3344	TTGGATTCTCTGGGAAGGTG	CCATGTGTACACTGCAGAAAAA
AUBES3349	AATTGCATGTTCCCAGTGTTC	CATGGTCGTGTTATGTGCTG
AUBES3351	GATGAGTTGGCACCTTGTCC	GCCTTACATCAGCGTTTTTCA
AUBES3356	GCATTTTGGATCAGTTGCAG	GGCACATTAACGTTACCATCG
AUBES3358	CTGCGTTCTAAAGAATTCAGCA	CTCCGTGGACTTTCGGAATA
AUBES3363	GATGGCTTGGTTTCAGTGCT	CTGTGGGACAAGTGAGCAAG
AUBES3367	AGTGTCTGGAGGAGGACGTG	TTGTATGGGGCAGCACAGTA
AUBES3369	CAGCTTGGAACGCTATCAGA	GAGGGGAATCCATGACACC
AUBES3370	GTGCAGCGAAACTGAATCAA	AAACTGCTGCGGGTCTACTG
AUBES3371	GGTTTCTTGATGAAGCACCTG	TCGTGTTTCTGCTTGGAGTTT
AUBES3377	CAAGGCCACAGAGGACATTT	GTGCACAATTGTTTTCACCTG
AUBES3383	CAGAGTGATTTCAATCAATGTAGC	GGTGCTGCTTGAGTGTGGATA
AUBES3385	GCCCAACTCTAACCATAAATCC	CTGATTTCATCTTTGGAGCAA
AUBES3386	CCAGGTTGTCACCTCCTTGT	CCACTGTTGTAGGTGGGTCCT
AUBES3387	CATATGGCGGGTTTGTTTCT	TTGGGACACTATGGAAAATGC
AUBES3388	TTGTCCATTGCTGTTCCAAT	CAGTCATAACATCGCTCTCG
AUBES3389	TGTGGAGACTGCAGAGTTTGTT	GCGTCTGACAAATGCCATAA
AUBES3396	GCTCCATGGATGGAATTTGT	CGTCAGTTGCTGGGATTTTT
AUBES3401	GCTCCATGGATGGAATTTGT	CGTCAGTTGCTGGGATTTTT
AUBES3410	TGTGAATGACCTTGAGTTGGA	GCATTCAGTAGCCTGCATCA
AUBES3413	GATCTGACAGCCCGACATTC	CATTAAAACGGGGGAACCTT
AUBES3417	GGAAAAAGTGAAGCGCTGTG	GCTCCATGTATATGCCCAAA
AUBES3418	CCAACTTTGAACCACATTGC	TACCGGATGCTTTCCAACAG
AUBES3422	CCAACTTTGAACCACATTGC	ATACCGGATGCTTTCCAACA
AUBES3427	GCTAGTGCCCCTGAAGTTTG	GGTGACAGACCCTTCAGAGC
AUBES3428	GCTTGTTCGACGCGTATTCT	GATGGATGGATAGAGCCTGTG
AUBES3429	TCCTCCAACAGTCCGAAGAC	CGCTTATCCTACACAGGGTCA
AUBES3438	GCAGGTCTCAGAGCGTAGGT	CGGACACTTTCAAACACACC
AUBES3441	GACAAAAAGAGACGCCACAAC	CAGTGTCAGCATCCAAGAGG
AUBES3442	ACATGGCAGTGATCCATTCA	AATCCCGTGGTTTTGAGTGT
AUBES3447	CTGTCCCTCTGCTGGGAGT	ATCACACCGCACCAATATCA
AUBES3450	TGGATATTTAAAGGAGATGTTAGGG	CATCCCCATGTTAACCCAAT
AUBES3453	ACCGACCTAGGGATGTTGATT	ATTCTCCCACAGCGCTCTTA
AUBES3455	TGCCTTTCCTCAGTTTGCTT	TGCATCGCTTTAGAACAGAATG
AUBES3459	TTCTCAGCGTTTGTTGTGGA	GCCGGAACTACTGTCAGAGC
AUBES3460	CAACTTGCGTCAGAACAGGT	TGCTGACTGGAATGTGCAAC
AUBES3461	TTTGAGTGTCCCCAGAATGA	CACCTGGATATTTGAAGAGCA
AUBES3472	ATTTCATCCAATAAGAGTCACTGG	TGACAGGTGCCACTGTAATGA
AUBES3477	GGAGACCTAGCATCCAGCAA	CCGCCCTTGACTGTACGA
AUBES3482	CCCTGGGATAAGCTCCACTC	CCAATTGGGAAAACTATCAGTG
AUBES3483	TGTTTTTGCTGTCTCCCTGA	TGGGGGTATGTACATCCAAAT
AUBES3490	CAACCACTCAGGCTTGTTCA	ACATTCGTGGTACTAGTGCTGA
AUBES3492	AGGCAGATACACGGACACCT	CATTGCAGGGAAACAACTCA
AUBES3495	TCAGAGTGTGCTGGGGTTAAT	CACTCAGGCTAATGGGGTGT
AUBES3498	ACACTTGTGGTTGGCCTCTT	AAGCAGCAGGACGTCTAAGC
AUBES3504	AAAAGCGGTTTACTGTACTTCCA	TGTACGAGCTGAGGAGTGCT
AUBES3508	GCCTTCTTGTGCACTCCATA	CTTCAGCGTTGTCACATGAA
AUBES3509	TCCCAGTGTTCCCTGGATAA	CATGGTCGTGTTATGTGCTG
AUBES3510	GTCTGGAGGAGGACGTGAAG	TTGTATGGGGCAGCACAGTA
AUBES3511	GGTCAACTGGCAACTCTGGA	GCTCTCTGTGGCACCGTTA
AUBES3512	ATGGGTGCATATGGGAGTTG	GGCTAGAATGATGATGCACAG
AUBES3515	CTGAAGTCGTGGCTTCACAT	TCCACAGGCTAAACCGCTAT
AUBES3517	TGTTGAAGTATGCCACCCATC	AGAAATGGAGCTGCAACGAT
AUBES3521	CCTTCCTCGCCGTCTAAACT	GGGCCTGTGAGATCCGTAA
AUBES3522	CATTTGACAGGAAACAGCCTCT	GGACTAGCAGCAGTGAGACAAA
AUBES3524	GCACTGCTTTTCACCTGCTA	GCTGATGAGTGTTTGGCTGT
AUBES3525	GTGTTGCGCTTTCTGAGATG	CCCACAACAGTCTCTAGCGTTT
AUBES3526	TGAAGCATGAAGCAGCAAAG	GCAAACCTTTTGGGAGAATG
AUBES3528	GTCCTCTTTGCCAAGGTTTG	CTAGGTCTTGCTGGGCACTC
AUBES3529	GGCACCACCAGTGAAAAGAT	GGGTTGTTGGAGGAAACAGA
AUBES3530	CCCTTTTGCAAGGTGTCTTT	CACTCTCAGACAACCACACG
AUBES3531	CCACTTGATGAAGACAACTAGTCAG	GACTATCTCCATCCCCCATGT
AUBES3532	AGCACTTGCATTGGAAACAT	CGTTTGTGCTGCTTCAGTTC
AUBES3537	GACCTCACCTGTCGATCTCC	GAGGAGGTGGCTGTCTATCG
AUBES3543	GTACCGAACGGTCGACAATC	CACTAATGGAAACACGCATTG
AUBES3548	CTCTGCCCTTTATGGGCTTT	CCCACTAAGCAACCCTGAAA
AUBES3558	CTCGGACTAACCGCTGTGTT	TCCATGAAATGTCCGCATAA
AUBES3559	TGCCTGGTTTTGTTGACCTT	AGGCAATCTCTGCCTGTCAT
AUBES3561	GCCTGGTTTTGTTGACCTTT	AGGCAATCTCTGCCTGTCAT
AUBES3570	CCAGCACGGCTCTGTTTTAT	GAAACATGCAGTGGAACAGC
AUBES3575	TGGGCAGGTCAAATACAGAA	GTTGGGATAAATTCGCACCT
AUBES3578	TGAAGCACTTTGAGCTGCAT	ACCTGCAGGATTCAGGAGTG
AUBES3582	CTCGTCTGCACTCGAACCTT	CGACAGCGGAAGAGGATAAA
AUBES3588	GCATGCAGTCCTCCAAATG	TCCAACAGGAAACCACAACA
AUBES3597	ACCCCAGAAAAGGGATCTTG	TGGGATAGGCTCCAGGTTC
AUBES3599	AACTCCAGCACCACGGAAT	CAGCTTGGTGACGTAAAGCA
AUBES3602	TGGATGACCTCCTCCTTCTC	GTGCGGCATTTTTCAACCTA
AUBES3603	GTTTACACACACCTTGCAGAATC	AGCGTGAAAAGCTGGACCT
AUBES3604	AGCTGCCTGCCCAGTAAAG	GGTCAGAGGGTGTGACCTGT
AUBES3605	TGCCCACCATTACAACACAG	GGCTCCCTCCTACCTCTCAG
AUBES3606	CCAACTTTGAACCACATTGC	TACCGGATGCTTTCCAACAG
AUBES3610	GCCGTTGGATTACTTTCCTG	CTTGCAAACGGTCCATAACA
AUBES3611	TAGCATTCAAACGCCCTTGT	TTGGGCTCAAACTATCTCCAT
AUBES3634	GTTTGCATCATTTTGCAACTTC	ACAAGAGCTGGCAAACCATC
AUBES3635	CTGTGCATGAGGCAGACATT	GGCTCCATCCATCCAGTTAT
AUBES3636	TTAGGTCCTTTCCCACACAGA	AGGGTGTAAAGGCACTCCTG
AUBES3641	TGCATGACTGGAAAAGGACA	GAATCAAACCCAAGCCATGA
AUBES3651	TGATAGAACTGGAACACACAAATG	CTCAAAAGCAGGATCCGAGA
AUBES3652	GGATTCCAGTCCATCACAGG	CCAGCTCCACAGGATTAAGG
AUBES3654	TTGAGCTCTGGAAAGGTGCT	GCCTGAAGCAAAACTGTCGT
AUBES3655	AGGTGTGAGGTGTGAACGTG	TCTGTCCATTCCCCAGAGAC
AUBES3656	AGCAAAGTGCACAGAGTAGGG	CCCTTTCCAGAACCTTCACA
AUBES3658	AGCACCTCCTGGTGACGATA	TCCGAAGGCCTTACAGAACTC
AUBES3659	GTGCATGCAGTCCTCCAAAT	TCCAACAGGAAACCACAACA
AUBES3661	TAACACGTGCTTCCACCAAG	ATCCAACTGGCCACATTCA
AUBES3662	TACTAAGGAGCCCTGCGATG	CATGAATGTGTGGTTCTGTGG
AUBES3663	TTTACACACACCTTGCAGAATC	GTTGTCCACAGCGTGAAAAG
AUBES3666	TTAGGTCCTTTCCCACACAGA	AGGGTGTAAAGGCACTCCTG
AUBES3667	TGCATGACTGGAAAAGGACA	GAATCAAACCCAAGCCATGA
AUBES3668	TTCCAGTCCATCACAGGACA	CCAGCTCCACAGGATTAAGG
AUBES3669	TTGAGCTCTGGAAAGGTGCT	GCCTGAAGCAAAACTGTCGT
AUBES3670	TGAGCTGGGAGAGGAAACAG	CCATGATTTCAATGCCTTTTG
AUBES3671	GCAGCATATCCCAGTCCTGT	CACTTTTCAGCGGCTCAGTC
AUBES3672	GCTGTGTCTCGGCAGGTACT	TAGGATCCTGATCGGAGTGG
AUBES3673	CCCCCTTTTGCAAGATGTC	TGCACATCCGTCCCACTA
AUBES3674	CGCACACAGCAGATACCACT	GTTTTGCTAGGTGCGATGGT
AUBES3675	ACCAGGGGAGAGATGGTAGG	CTGCGTTCGACTGAAAGTTG
AUBES3676	GCGCCAGTACTTTTGAGAGC	GACATTGTCATTCTTTATGCAGGT
AUBES3677	TGCCCCGTTTAATAGACTGC	CCCGCTATAAAGAAAGAACTCG
AUBES3679	TGCCCCGTTTAATAGACTGC	CCCGCTATAAAGAAAGAACTCG
AUBES3680	TAGCCAGTCAACCCTGACCT	TCTTTTCCCCTTCCTATCCTTC
AUBES3682	CAACGATGCAAAGCATAGGA	CAAAGGCAACCTGAGTAAACA
AUBES3684	GATTGCATTTTTAAGCACGTACC	TGATTCAATGACATCCTGCAA
AUBES3685	CTGGAGTGTGGGCAGCTTAT	GAAAAGTGCACCGTCCTGTA
AUBES3696	GCTGCCAGGGTAGTTAGCTG	AGCGGAGGCAATTCAAAATA
AUBES3697	ACGCACACAGCAGATACCAC	GCTGTGTGAAGACTGGGTGT
AUBES3699	GTAATGCACTGTGGCCCTCT	TTGAGTGCTGGGGAGAGAGT
AUBES3700	AGCACACGAGTGTGTTGGTC	CTGAAACCTGCAATAAACCTGA
AUBES3704	AGGGCAGACACAACACCTCT	CATCTCTGCAGCATATTTCACA
AUBES3705	GTGGATGTGAGTTCCTGCAC	GATCGTGAACGTGTCCAGTG
AUBES3706	CATGGGGTCTGGAAATTCTG	TCTGATGCATTCCTGAGCAC
AUBES3707	TTTTGGAAGGAGTCTCCAGTG	TGCAGCTACAAATTGCCAGT
AUBES3709	GCGCTGAAGGTCTGAACAAT	TCACCAGCACTGTCACACAC
AUBES3710	AAAGCAGGGCCCTTTACAAT	CGTGTGCGATGCAGGTAAT
AUBES3715	TATTGATGCACTGCCGATGT	CCATACGTGTAAAATGTTACTTATTCG
AUBES3721	CTCGCCTCAGTAAGCTGGTC	AGCTTGACAAAGCCAACATTC
AUBES3722	TCTGCATGCTGGACTGTCTC	TCCACTTGGGGATCAAGAAC
AUBES3724	CGCTGATGTGCATGTTGAAT	GAGTGGGGCAAAGAGAATTG
AUBES3725	TCAAGTTGTGCATAAACATGAGC	TTGATTCGGCTGTATCCGTAG
AUBES3727	TCGCCGAGTCAACTGAAATA	TCATGGCTGCATTACCACCT
AUBES3735	CATTGAACCCCTCTCCAGAA	GATGTGCCCGTAAACGACTC
AUBES3738	CGCTGTCTCTGTGCTATGATG	CTGACTGCAGCGTGAAAGAG
AUBES3740	GCGCACACATATGCACACTA	TGGCAGGCAATTAACACGTA
AUBES3743	CGATAGCTGATAGCGGGAAA	GATGGAATAAGTGAACCATCGAC
AUBES3748	AGAGGTGTGTGTGGGTTTCC	TGAGGAGGACGGCTAAGAGA
AUBES3751	CCAAGCGCTCATAGTCCTTT	GACTCCACATGCCGAAGTGT
AUBES3753	TGTCTATGGGTGCGTCTCAG	GTTTTCGCGGTGCATTGT
AUBES3754	CAATTGCAAACACAACACAGG	TCCCTTGCCATGTATTTTCC
AUBES3761	GATGGATGGATGGATGTAAAGAT	CCATTCATTCGTTCATTCATTT
AUBES3762	TTGCCAGATGATGACCTTTG	CCCCGAGTTTATGATTGCAG
AUBES3768	CCCACTGGCACCAATTAGAT	CAGAGCTGGAGGAGAGGATG
AUBES3776	ATCGCGATCGACATATTGG	CATGCACATCAGCGAAACTT
AUBES3778	CAGAAAGAGGGAATGGGAGA	CGAGGGCATCGTAGAAATGT
AUBES3786	GTCGCAATTCCCAGCACTAT	GGAGGAGGAGGAGGAGGAGT
AUBES3787	GTTACCAGTGACGGCTGGTC	CGTAGCTGCCTATCTGCCTTT
AUBES3790	TTCGCTTGATGCCACAATTA	TGCTTCTCCAGAAATTTGGACT
AUBES3796	TCTCCCACATGCTGACTCTCT	AGTCAGTGGAGTGGGTGGTT
AUBES3797	ATCACCTTCCCATTCCCTTC	AAGCGGATAATGTATACACATAGGG
AUBES3800	TCCCGAGGACATTTCTACGA	GATGCCGTTGATTTGACGTA
AUBES3803	GCACGTAACGTCTCATTGGA	CACGATAAGGTGACGGTTCC
AUBES3808	GAGTGACCCCAGAATGACCT	TTGACCATCGAACATCTGGA
AUBES3810	AGGTTTAGGCGCTGTAGTCTTC	GCTGGTTTGTGCCGTAAAAT
AUBES3811	CAGTTTGAAACCGGAAGTGG	TTACTGGAGCGATGTGGTTG
AUBES3816	CATATATCGCCCAGCCCTAA	AAAACAACACACCGTCACTCTC
AUBES3820	GCTAAATTTGAGCCAGCAAT	CACCAACATGGTCTGGAAGA
AUBES3825	GCAGGGATATGCATTTTCTCA	CCAGATTTTCATTGTGGTCTCA
AUBES3826	CTGCTTGAAAAACGATTTACTGT	GGCGGGCATGTAGACATAAT
AUBES3827	GTGGGTGGAAATGCTTTGTT	ACACCGAATGATGGGAAAAA
AUBES3830	CAAGGGAAACTAGGCCACTG	TGCTCCATATGCTTCCAATG
AUBES3832	CACATGACAATTTTGTTTTGTTTTT	CCAAGCACAAGGTTGGATTT
AUBES3834	TGCTTTTGTTTTCACGGACT	GCTCCTGTCACTCACTTGGA
AUBES3836	ATTCTGACCCATCAGCAAGG	AAACATCCCAAAATATTCATCCA
AUBES3838	AGCACTCATGCACACACACA	CACTTCATGCCTGTCAGCAG
AUBES3840	CGAGACGAGAATCTTCACCA	GCGGGCAAGTAGACATAACA
AUBES3841	CGAGACGAGAATCTTCACCA	GCGGGCAAGTAGACATAACAC
AUBES3842	TTCCAGGAACATGCTGACAA	CTTGTTTGCCGGCTTATCAC
AUBES3843	CACTACCGGTCAAACACATGA	GTGTTGGTTTGTGCCGTAAA
AUBES3848	AAAGCGGTTTACTGTACTTCCAA	AGTGTACGAGCTGAGGAGTGC
AUBES3849	TTCAAGCAATAAAACCCCAAA	AGATACCGAGCGAATGCTTG
AUBES3850	TGGGGTTTCCTCTGGGTACT	AACCTGGAGCCTATCCAAGG
AUBES3851	TGGGGTTTCCTCTGGGTACT	CTATCCAAGGGAGCATCAGG
AUBES3853	GCAGTGTGGGTTAAGGTGCT	GTTTGTGCTGGTTTGTGCTG
AUBES3856	CCCAAAACACCTGAAATTGG	CGCATGTTCCATGTTTTGTT
AUBES3857	TGGCTCAACACATGCCTTAT	GCCAGTGTACACCTCAGAGC
AUBES3859	CCATCCACATTTTCTTCAGGA	ACGGTGCAGGACTAGTTTCG
AUBES3860	CAACAATTCCATGGGGTGTA	TCAACGTCATTAATTTGCACTG
AUBES3862	GGTCAAACACTTTGGGATCG	TAATGTGGGAGGGGCCTACT
AUBES3863	CCTGCAGGTGGAGTGAGTAAG	GCATGGTTGGAATTGTCTGG
AUBES3864	CACTTTGGGATCGATTCTGG	TAATGTGGGAGGGGCCTACT
AUBES3865	TAAATGCAGGTGTGGACTCG	AAAGCGACAAACTAGCAAGTGA
AUBES3868	TAGGAGAACTGGTGGGGACA	AGATTGTGGCTGCGGTAAGT
AUBES3869	TTCGCTTGATGCCACAATTA	TGCTTCTCCAGAAATTTGGACT
AUBES3870	CTCGATCAGTGAGCCTTGTG	GAATGTCATCTGGGCCAATC
AUBES3874	GACTTCATCGTGTGGCCTCT	GCTCTTTCACCTTGTTGATGG
AUBES3876	TTAAACCCTGGCAACCTGAG	AGTCCAGCTGAACCCCATTA
AUBES3877	CTGGCCATACTTATACTCTTACTCAAG	GGGGAGTCCAAACGACAATA
AUBES3881	GGTGGGTGTGTGTGAGAGAG	TCATCTCACCTCCTGTGTGC
AUBES3882	TCATGAGACACTCACCATTTTTG	TCTTTGGTTGTTCCTCTGGTG
AUBES3883	TCTTATGGATCCGGAGGAAG	TCCTCGGAGTCAGAGAGGAA
AUBES3884	CATGGCAAATTTTCCTCTCC	ACGACGCTGTTCGTACATTC
AUBES3885	GATGTGTGCCCCAGATCAGT	CAGGTCATCTCTCTACCTCTCCA
AUBES3886	CGGCCGATATCACTCTGAAT	GCATCTCTGCTCCATTCTCC
AUBES3887	GGTGGTGTGTGAATGTGTGA	GCACAACATGCACTTCCAGT
AUBES3889	CAGCTTTTTAATAGTGCCTGGT	CCAGCACGCACACAAACTAA
AUBES3890	GAACATCCAGCAGCATCTGA	AGTCCTGAGGGTCCTTCGTC
AUBES3891	CGATTTTCAGGTGAGTGCAA	AATTTGGTGGAAATGGATGC
AUBES3893	TGATTGGCATGTCCAAAGTG	ATCCATCCATCCATCCATGT
AUBES3894	TGACGCAGTATCACAATTTTATCA	AGCACATGGTCACGAGTCAG
AUBES3896	TGGAATGAAACAGGAAAAACC	CCTTACCTTACCTTGCCTTCG
AUBES3897	TGTGAAAGACCGTGCAAAAC	AGGTGATCAGCCAGAATTGG
AUBES3898	GCAGATTTCTCCATTTCCACTC	TGTGGTCAGCATCAACCACT
AUBES3903	AGTGAAGGAAAGCCCAAACA	ATCAACATCGTTTGGTGAAGG
AUBES3904	ACTTTCCCCCTGATTCGTCT	CCCCCGATTAAAACAGCTTA
AUBES3906	CACATGGGTGATAGATGTTGG	GCCCCATCCTGATTTCTTCT
AUBES3907	ATAAAACGTCCGTGCCATTC	TGAACTCGTGGGTGAAAATG
AUBES3908	ACCTTTGCCCTGACACACTC	GAGGGCTCTCGAGTGGAAG
AUBES3912	TATGGCAGGCACACCATGTA	GCGATAAGCACCAACTCGTC
AUBES3917	TGCTCAGTGTGAGGAACGAG	CAGGCCAATCCATAGAGGAG
AUBES3921	GCTGTCTCTCAGCCTTTCCT	ACACGGGTCGTTATCCACAT
AUBES3922	ATCTGACTCCTCGCTGGGTA	TTCATTCAGACGGTGCAAGT
AUBES3928	GGGCTAAAAGTGGATGCAGA	CTGTCCTCTACAGCACGTCA
AUBES3929	ACGTAAACGGCAACTACGTTC	CACCCGAAACTTCGATCAAT
AUBES3930	CCCTGCAACCTTGTGTAGGA	GGGGATTGAGAAACCATTCC
AUBES3935	GTACAGCGCCTTTGAGAAGC	AACAGGATCCGCTCAATCTG
AUBES3936	TTCACTCACCACAATCAAAAGC	GCCAGTACCCCACTGAAAGA
AUBES3941	AATGCTGGTTTGGCAACTGT	TGAATGTGTAAGCGATTGTGC
AUBES3949	TCCTCGGAAAGAGTTTGTCG	CCGTATCCGTTTACCGTGAC
AUBES3951	TTCCAAAGCCTGGAGATGAC	AAGTGTCACTGGCAGAGCAA
AUBES3953	TTTTCCCCCATTCCTTTCAT	TGGCCATCAGTAATTATTATATGCTT
AUBES3958	CACTTGCAAACACAACACAGG	GCATACAGTGCCCTCCACTA
AUBES3960	AAGTAAATGCCCCACACTGC	CTTGGGCAAGACACTGAACC
AUBES3961	CAGATAAGCAAGGCACAAACC	TCCATGTTCCGTTTTCCTTC
AUBES3962	ATGCGCAGTGTGGGTTAAG	CGTTTGTGCTGCTTCAGTTC
AUBES3964	CGTTGTTTTTCCGGATCTGT	CTCAGACCTCAGAGACCAGCA
AUBES3966	GAGTCGGCACCTCCTACCTC	AGTAGTCCCGCCTCCTCCT
AUBES3968	ACAGAAGGCCAAAGCCACT	TTGCCGTAAAACAACAGCAG
AUBES3973	CGGGACGGGAATAAAACAG	GACGCACACACACACACTCA
AUBES3974	GTGTGTGTGTGTGCGTGTGT	GACCGCTCCTTTCTTCTCCT
AUBES3976	ATGTGTTTTGCTTCCCTTGC	GGAAGAACATCACCTTCACCA
AUBES3981	CCATATGGAGTGGCACACA	AATTGCACATCTGTCCACCA
AUBES3982	GAGGGGTTTGCTTACCTGTG	CCATGCTCTTTCACACGATG
AUBES3983	TCAACATCGTTTGGTGAAGG	CAGTGAAGGAAAGCCCAAAC
AUBES3984	GAAATGGTAAATGGCGCACT	CTCCACATGCCGAAGTGTC
AUBES3986	ACACACACACACACACACACAC	GATCAGAACTCTGGGGATGG
AUBES3990	GTATGTGCGATTGTGCCTTG	GTGTGTGTGTGTGTGTGTGTG
AUBES3994	TCCACACCACAAGGAAACAG	GCACACACGGCATTCAAAC
AUBES3996	AGAGGTGTGTGTGGGTTTCC	GGAGGACGGCTAAGAGACTG
AUBES3997	ATACCAGGGTCCGCAGTATG	TCCAATCTTTAGTGTGTGTGTGTG
AUBES3998	CCGGAATTCGTTCCTCATTA	TCATCCTGTCGTTTGCATTG
AUBES3999	CGTTGTTGCGCTGACTTATT	GAGAACCCTTGGAGGGAGAG
AUBES4001	CATCCAGCAAAAGGGAGAAG	CCGCCCTTGACTGTACGA
AUBES4002	AGTTCTTCCGGACCTGATGG	TCTGTTGCACACTGGAAACC
AUBES4004	TAATAAGGCTGCCGAATGTG	AGTATGGGGAATGCCTTGTG
AUBES4008	CCAAGAAATGTTGGCAAGGT	AGCAGGATGGGGCAAATACT
AUBES4011	AGGTTTGGTATGCGTGTGGT	TCATGATGAAGACCGCAGTG
AUBES4013	CTAGGCAGGCAGGAAATGTG	AAAGGCAAGACATGGACCTG
AUBES4014	TGAGGGGTGTAACCAAATGC	CAAACACAGTCCATTGCACA
AUBES4015	CTGGCATATTGCACTTTAACCTC	CGCATGTTCTTGTGTAGTGTTAGA
AUBES4016	CAAATCCAGTGGGCTACAAAG	TGGTAACAGACCTGGACACG
AUBES4018	AATGTCCCTTCACTTGCTAAGA	CTGTAACAGACTTGCGATAATGTG
AUBES4023	AATGTGTTGCTCTGGTGGTG	GCTGGCCATGAACACTAAGC
AUBES4037	AATTTGGCAAAACCAGTTGC	AGTGAGCTTTTATGCTGCTTTC
AUBES4038	CACAGTCTCAGGGAAGCACA	TTGGGAAAAGCCTTTGGAC
AUBES4039	GACAGGTTCCAGTTCCACCA	ACATTCCCATTCAGATCAGC
AUBES4040	CCCTTTGGCTGAGAAGTGAG	TTTCCCCTACAGTGTGTGTGAG
AUBES4041	CATATCGGCAAATTGGCAAC	GGGGTGTACTGACTTTTGTGAG
AUBES4042	AAATGCCTTTCAGCAGCAAC	CTGACTGTCACATGACCAACC
AUBES4043	GCCAGTTCCAGTTACCAATACC	CCACATTGTAAAGCTGGGAAT
AUBES4046	CCAAAGCTGTTCTCATGCTG	CGGACCTCTACTGCATCTACTG
AUBES4047	GCAAAGCGATATATCAAGCAGA	CCGCAGAATCTCTCACCATC
AUBES4048	CCTGCTGAGACCCAGGAAT	GCCCCGGTAGTGAAAAATTA
AUBES4050	AAGCATGGCAGTAATCACCA	CGGAGGATTTGAGATTGGAA
AUBES4053	CCTTACCTGGCATTGGACAC	CTGCAACGTTCTAGGGAGGT
AUBES4054	CCTGAACCAATCTTCCATTTG	GGACGTTGGCTCTCCATAAA
AUBES4055	AAACCCTGTGAACATGTAGGC	TCAAGCCTCCTGCTAATTCC
AUBES4056	TCTCCAGTGTCAGCGCTATG	TGCTATGGAATGTCTGTGAAACA
AUBES4057	CAGAGGACAAAACTGCCAAC	GCAGAAGAAGCTGTGGAAGC
AUBES4065	CCATTTTGCCTTTTTGTGCT	TGACTCATAAACCCAGTTCATCC
AUBES4067	GCGAGCCAGAAAATGACAAG	GCATGCTTGAGCGAGTCTTA
AUBES4068	GGATGGATGGATGGAAAATG	GAGCCTGGCCAGAATATAGC
AUBES4072	CTGGTCCCAACCAAGAAAAC	TCTGCAGGGTGAGAAATTGA
AUBES4073	TGGGGTTTTCTTCACATGTCT	TGAAAGCCCGCTTATCATCT
AUBES4074	TTTGATGGTGGAGGTCTGAA	GCCCAAATCCAAACAGAGTG
AUBES4077	ATATGGCCAGACGTTTGTGG	AGGGTGCCTAAAACACTACAGC
AUBES4078	GGAAGCCCTTTCTCAGGAAC	AGTGCCAGCTGAAGAGAAGC
AUBES4079	TGAAATATGGTGCGAACAGC	TTCAGTGCATGGCTGAGTTT
AUBES4081	CTTTGAGTGCCTGATTTCACC	TGTGTATGAGGGGGAGGTGT
AUBES4088	TTCAAAAACTTTAGCTGCCATT	GAAAGTTTCCATTTTCCAGGTG
AUBES4089	AATCAACTGCAGCCCAACTC	TCACTGCAGATGACGATGCT
AUBES4090	CACCCATCCTGTTCACACAC	GCTGCAGTCATCCTGCATTA
AUBES4091	CAGCAGTGTGTCAAGGCTGT	CCTAGGCGAAATTACCAGCA
AUBES4092	TAGCTTTCAAGGGCTGTTGG	TGCGTGATCTTGTCTGTGGT
AUBES4093	GCAAATGCTTCACCATAGCA	TGACTCAGCACATCCCAGTG
AUBES4100	CCTCACCCCACTTCCAGACT	ACCATGATGAAGCGCTAATG
AUBES4102	CCCCAGCACACAGTAAAAATG	TGGCTTATCACACGTGCTTT
AUBES4104	GGCAATAAAAACCCCCTGAT	GTGAATTGGATGCAGGTGTG
AUBES4105	TGTGTTTTCTCTCGGTTCTCG	TATTTGCACATTCCGCTTCA
AUBES4106	CCGAACTCACAGCCAAAGAT	GAGACCTTAGCGCCCAGAG
AUBES4110	GTGGCAAGGTGGGTGTAGTC	TCAGACATTGGCATCAGCAG
AUBES4112	ATAGGGCGCCAATACTTTCC	GACCTGCTGTGGCTTTGTTT
AUBES4114	TGCACATAGTTTTGGCCGTA	GATCGAGGAATGTGGAGGTG
AUBES4117	CCCCTGTAGAAGAACGATGG	TCAGGAGGCAGAAGGAGGAT
AUBES4120	TCCTGCCTTGGTTTTTGAAC	ATATTGGCACCGTTTCCTTG
AUBES4121	GATTGGCATCTGGCTTTGAT	TGCTGGACTGCTTCAACAAG
AUBES4123	GAATCCGACCCAGAAGAACA	TAAAGGGGGATCATCTTTGC
AUBES4125	CAAAGGAAGCGTGTCTCCTC	GTGATGTCAGGGTCACTCCA
AUBES4128	GCCAGTTTTATTTTGCACCTTC	TTCCATCCTGAAGAAGAGCAG
AUBES4129	CCTGTAGCGCTGTCACATTG	CACCGTCCCAGGAATAATTG
AUBES4131	GCCGTAAGGAGCTTCATTCTT	ATGACCCCGTGTGACTCAAT
AUBES4133	GTGTGGCTGAAGGGGTAGTC	TGCAGAATGGGAGAGGTGTA
AUBES4140	TTGGTGGCTGTTTGTTTGAG	GGGATCGTGTCTCTTCTACTGC
AUBES4145	GATCTCAGAATCAACAGCAGCTT	TTGAGGCCACAGCTTAGTGA
AUBES4146	CAGAATCCACTGCAGCTTCTC	TTTGAGGCCACAGCTTAGTG
AUBES4152	CCATCAACACCTCTGCTCCT	AAGGGCTGCATGTTCTTCTG
AUBES4153	AGCAGGTCTCAGAGCGTAGG	GTGCTTGCATGTACATTACCC
AUBES4156	GCCTCAACAATTTGGTGTGAA	CCCCTTTTGCAAGATGTCTTTA
AUBES4157	CCATGGTAGCAAGTTGAGTGC	TGGGCTGCTCATAAAATATGC
AUBES4158	AGGGAAACTAGGCCACTGCT	TGCTCCATATGCTTCCAATG
AUBES4159	GCCTGTTTCACACAGTGCAT	AATCCCTGTGACCCTCCACT
AUBES4160	GGCTCCAGGGACCATTAAGT	TGCATAAAATGTCATTATTCTAAACA
AUBES4161	GAACTTGCCGGGAAATGAT	ACTGCGTGAAGATTGTCGAA
AUBES4164	TTTCTGGGAGCTTCATTAGCA	GAGCAGGACTCTGCCAGTCT
AUBES4167	TTGGTGCAAGAGATCGAAGA	CCAATGCCCTAACCACTGAG
AUBES4168	GAAGCCATTAGACAGAGAAGCA	ACCTGTTTAACGGTGGAGGA
AUBES4169	TATTTTCCTGCGACGGAATG	GTGCAGGAACAGGACACTCA
AUBES4171	CAGGACACACCTGGGTAACA	CAAATTTGGGTTCGAGATCA
AUBES4172	CAGTTGGGATAAGGCTTTGC	TGGAAAGAGACCATGAAGGA
AUBES4173	GCCACCACATCCTTTAGCAG	TCTGTTCGTGGCTTCATCAG
AUBES4174	GGAATGGGATCACCACAAGA	GCACAACTACAGGATCACAACA
AUBES4175	TAGTTTTGGCACTCGCTTCG	TTACAGCCAGGTCACAGCAC
AUBES4176	ATGCGCTGAGCCATTTAATA	TTTCCAGCACTGCCTTAACC
AUBES4177	ATGGATGTGCCACACAATCT	GAAGTGGGCAATTTTCCAGA
AUBES4178	AGTATAAAGGGCCGCTCGAC	AAATATGGGGCCTCTTCTCG
AUBES4181	TCTCCACAAACTCCCACTGA	ATGCGCACAAGCATCATTAC
AUBES4184	GGAACCCTATGAGCCTTTGA	AGTGGGCTGTTGTTCCTCAG
AUBES4186	GTTCGAATGGTGACCAGCTT	TCATCTCTGGCCTTTGGAGT
AUBES4187	GCACTCTCAGTCACGCTTTCT	GGGATGAACTTCAGGACAGG
AUBES4188	CCCTTCAATGAGGTTCATGGT	TCTTGGTTTCAACTCCGTGTC
AUBES4189	TTGGTGGGAGATTTCTCTGC	AGGTAAAGGGCATGGGGTAG
AUBES4190	TTCAGTTCCTGCCCTTTCAG	ACTGAGCGCATCGAGTCTGT
AUBES4191	TTGGCAGCAGATTATTCACG	TGATGGTGCGGTAGATCAAA
AUBES4193	ACGTGTGCTGAGGGAGAGAC	TTCTCACCAAATGCACCTACA
AUBES4195	GCAGACCCGAGAGTTATGGA	GAAAACATGCCCCTCTAGCA
AUBES4196	CCCCACAGTTGGTACCTTTG	TGGCTCTCAACGAGAACTTG
AUBES4197	TCTGAACTCCACAACCATGC	CGTCATGGATGTTTCAGCAC
AUBES4198	TGCAAGGCCTCTGGTTTAGT	GGGTGGTGAGAGTTCATTGG
AUBES4199	TCCCATCACTACTGCTGCTG	CAGGAAAGGCGATACAACAGA
AUBES4201	GGGATATCTGTTGGGGGAAT	GATGGGTTACACAACACTGACG
AUBES4202	CCCGCCCTTGACTGTAAGA	GGAGACCTAGCATCCAGCAA
AUBES4203	CCTGTGTTAGTGGGATGAGC	GGTCCAGATCATTGTCAACAGA
AUBES4204	CACAAAAAGAAAAGGCATGG	TTGTTCAAGCTGGTGCACAT
AUBES4205	GCCTTTTCTTTCCCCTCTGT	CAACCTGGGATATGCAAAGA
AUBES4206	TTACCAACTCACACTCCTTTGTG	CCTCTGTGGCCACCAGTAAT
AUBES4207	ACTGACAACCACTACATATAGACACG	CAAATTCACCCCAAATGGTC
AUBES4209	AAGCCTGTCTGCCATTAGGA	CCCCCTCCTTAATTCTCATAAC
AUBES4210	CCACCACCATGTCCCTTTAG	TTGGAAACGGTTGTCTCTGA
AUBES4211	GTATGGTGCCAGGGTTCACT	AGTAATTGCGGCAAGAGTGC
AUBES4212	TTATTTCCAGCGCTTCTCCT	TGCCACAAATTCCTAACACG
AUBES4213	AGCTGCTTTAAGGCGCTAT	TCGGTAGGTCGGGTTGTTAG
AUBES4214	GCAGAAGGAGGATGATGTGG	ACCCTTCTGACCCTCAGCTA
AUBES4215	TTGTTCCTACTGGAACCCAGA	TTTGTATGTGGACACCTGACG
AUBES4216	CAACCGATGCTAGCTTTCCT	GCAGTTCTTCCGGAATTGAA
AUBES4217	CGCCCCTATCAGTGGAGAT	GGTCCTCATTTCTGTGCCATA
AUBES4219	TTCCCAAGATGCAACACTCA	TGGTAACGCAGAGAAACGAG
AUBES4222	TGCATGATTTTCGCTACACC	CCACAATGTGATCCATGACC
AUBES4223	CGGTATATTGGTGCTTTAATTCAG	CAATCAAAAGAGGGCAGGAA
AUBES4227	GCCTGCATAATGGATGGAAG	ACCCAGCTCATAAGCCAAGC
AUBES4235	TGACACTGGGTAGGAGGACA	TTCAACGGTGGGACTCAGTT
AUBES4238	CCGTTGTTGCGCTGACTTAT	GGAGGGAGCGAGAGACTTTT
AUBES4245	GCATGGCAGTGTGTTTTCAC	TGGCCATTTACAACCCTCTC
AUBES4246	CCAGCAAAAGGGAGAAGAAG	CCGCCCTTGACTGTACGA
AUBES4248	TTTTAATGGCCGATTCATCC	CGTTTGTGCTGCTTCAGTTC
AUBES4250	GCGATCTACCTGCACTTCCT	TCCCTCTGACTACACCAGCA
AUBES4251	CCAGAAAGAAAGAAAGAATTCCAG	AGCTCCAATACGCTGCTCAT
AUBES4252	TCTCTTGGCTATGGGGTAGG	CTTTTGGTGATGTGCTGTGG
AUBES4253	GATCCAACGCTCTCAGGTGT	ATCCCTGGACAGGAAGTGG
AUBES4256	CGGTCTGGCATATGTATCTGG	GAGGATAGCGTGTGGAATGC
AUBES4258	CCGTTGTTGCTTTGTTGAGT	GTCGGTGATTGGGTTACGTT
AUBES4261	TGAGGAGATTCAGCCAAGTC	CCTGCTGCTCTACCTTGGTC
AUBES4262	GATGGATTGGGACAAAGTGG	GATGGAGTCAGGGACGTCAG
AUBES4265	GTCCAATGTCCCTCCAGAAT	AACTACGCGATTTGGGACAC
AUBES4267	CAATCCACCCCTCTTTAATCTG	CAGGTTTCGGGCTTTATCTG
AUBES4272	CATGCACATTGTCTGGCTTC	CGGGCATGAGCATACCTATT
AUBES4273	TGTTTTTCGCTCACCAAGC	TTGATATGCCGCCTAAGGAC
AUBES4278	TGGTGAAAGACCAGTTGCTG	GGAGACAGAAGGAAGACCTCA
AUBES4281	GCCAATAATTGTGGCACACC	GTGCTCCAGCTGTCAATCGT
AUBES4282	TTCGGATACAGAATGCAGAGC	GGAAGATTAACGCCTCATGC
AUBES4286	AAAGCGGTTTACTGTACTTCCAA	TGTACGAGCTGAGGAGTGCT
AUBES4287	CCTGCCTACAAAGCTAGCAAA	CGCCCAAACACTAAAAGGAT
AUBES4288	GACAAACAGTGTGGGACTCG	GCCCCGGTAAAGGTTTATTT
AUBES4296	GGATGAAACCAGCATGAACC	CGAGTCAAAAGCTTGCTCGT
AUBES4297	GACCGGCATCTCAATCTTGT	GTGATCAGGTGACGATGCAA
AUBES4299	GAAGCCGCACATAAAGAAGC	AAACAGTTCAGACTTCAGTGCTC
AUBES4300	GTCTGGAGGAGGACGTGAAG	TGTATGGGGCAGCACAGTAA
AUBES4301	CTTGTTCGACGCGTATTCTG	GATGGATGGATAGAGCCTGTG
AUBES4303	GTCATTCCCTCACCGAATTT	CCAGTGTCAGCGCTTTGTAA
AUBES4306	CAGAGTGATTTCAATCAATGTAGC	TGCTGCTTGAGTGTGGATAG
AUBES4308	TGACTGGAGCATTCATCTGG	TTCGTTCAGGAATCCAAACA
AUBES4309	TCTTTAAAGCTTGTGGACAATCAG	TTGTGCAAATTAAAGGCTATGAAA
AUBES4316	GGCGCTGTGCTTTTACAGAT	TCCTAAGCATCTAGTGGGTGA
AUBES4318	TCTGCCCTTTATGGGCTTTA	CCCACTAAGCAACCCTGAAA
AUBES4319	CTGGAAGCAATGTGTTGTGC	GAGACGCGTTTCTGCTCTGT
AUBES4330	GCAGGCAGAAGGTCAACTAAG	GGACACCTTCAAACACACCA
AUBES4332	CGGCTCTCTGCTGGATTTAG	TGGCTCCTCAGAGTCACAGA
AUBES4335	AATGTCACGGGACTTTGGAG	AGCATGCTAGCGGTCTCATT
AUBES4336	TCATTGGGAATCAATGAGCA	AACCGGCAGTGGATTATGAG
AUBES4340	CAGTTCTACTGTCCTGCATATCCT	TGTACGAGCTGAGGAGTGCT
AUBES4342	GCAAGGTGGGTGTAGTCGAT	GTCAGACATTGGCATCAGCA
AUBES4344	ATGCGCAGTGTGGGTTAAG	TCGTTTGTGCTGCTTCAGTT
AUBES4347	CTTGGCCACCAGTGTAACCT	GTGGACACTTTGCAGGACAA
AUBES4352	GGGGACAGCAAATTTACACTG	TGTCTCAAGTCAGAGGCCATT
AUBES4353	ACCATCCCCGGAGTTCTG	CGTAGTCGAAACCGGAAACA
AUBES4356	TTCCGGATCTGTGACATTTT	TCAGACCTCAGAGACCAGCA
AUBES4358	CTTTGTTCGGAGGACAGAGG	AGTGTTTGATGTTGGCGTGA
AUBES4359	TGGAATAAAGTGCTGCCATT	TAAAGTATGCAATGAAGGGAGTTTT
AUBES4363	TGTGAGAGAGGGGTTTGCTT	CCATGCTCTTTCACACGAAGT
AUBES4364	ACCCAATTGAGCAGCATTTC	ATTTGGTTGCGTATCCCTTG
AUBES4376	AAACATCCCCAAAGAGATGC	GACTCCAGGACCAGGATTTG
AUBES4377	TTCTGGAGCGTTGAAAGGTT	ACCAACATCCTGTGGAATGG
AUBES4382	ACATCCGAGATGAGTCAAACTT	GAGGGAATGACAGAGGCAAC
AUBES4386	GTTTGAGGCCACAGCTTAGTG	CACGGAATTCCAGCATTCTT
AUBES4387	CAGGCTTCTCTCCGATCAAT	ATGATGAGCGTTCACACAGG
AUBES4390	GCACGACGGACAATGAGAG	CATTTTGCAACGCAGGTTTA
AUBES4391	GCCTCTGTGCCTACCAGTCT	CTCCTCTTCCATCAGCCAGA
AUBES4393	GGGGAATGAGCCGTTATTAT	CCACAGAAGCTGATCCTCGT
AUBES4394	CGTGCGATCTGACATCAGTG	CAGCAAGGAGCTGTGAAGTG
AUBES4396	ACGGTGACTTGGTGGTTAGC	CGGGTACACCTGATATGTGC
AUBES4398	AATCAGGTGGGAAACAGCAG	CATCCTTGCTGAAACCCTTC
AUBES4408	TCGGTGCTGTGAACTCATAA	TGACGTTCCCACACTTTTAGG
AUBES4409	TCACCAGAACTTGTATAGTTGATGC	CTGACACTGGAGACTCCTTCTG
AUBES4413	GCCGATACGATCACATGACA	GAGCTATGCCAAACCTCAGA
AUBES4420	AGAAGGGTATGGAGCTGTGGT	CCCCCTCTCATAACATCTGC
AUBES4421	CCAGTCCATCAGTAGCACGA	GTTTGTGCGAGACACAATGG
AUBES4422	TAGAGCAAAGATGCCGTCAA	GGTTCTGCAAGACGCTCAAT
AUBES4423	GGTGCTGCGTTAAGCAAACT	CTGCTTTGGGAAAATGTCCA
AUBES4438	TGCTTGGCACAAAACATCTC	CAGAGCAGGTCCCAGTTTGT
AUBES4446	CACATCGTCATCCTCGTCCT	GACAGAGACTTGGCGGAGAC
AUBES4448	CCATGCCAGCATGTCATTAT	TGTGTGTGAGTGAGAGTGAGTGA
AUBES4449	GTGTTCGCTGCAGGTATGC	AGCCCGTGTCCTGTCAGATA
AUBES4453	CGGAGAAGAAGCGACTCTCA	AATCTTGTGACTTTAATCCACACTG
AUBES4454	GAACCAGCCCAGATCAAGAG	GGGGTGCTTTAATGTCCTCA
AUBES4458	TGTTGTTCTTGCATGAGTTGG	ACGGGAGTTGCATGAATGTT
AUBES4463	CCATCTTCCAGACTGGCTCT	TGAGAAAGACACTGCCACCA
AUBES4465	GGCAGGAAGTAAGCACAGGA	AGCATGCTAGCGGTCTCATT
AUBES4469	ATGTCCCCACAAGCTCAAAT	CCCAACCCTAGCCTTAACCT
AUBES4471	CCCTGCATACAGATGTGTGACT	CCCTGCATACAGATGTGTGACT
AUBES4477	GGGTGAACTCCCAGTCTGAA	GGGTGAACTCCCAGTCTGAA
AUBES4481	CGTGCTGAGAAATTGCATTC	AGCATCTTGCACAGGTTTGG
AUBES4482	GTGTTGAAGTTCCGCAATCA	TCCATGCAAGGTCTTGTAACC
AUBES4485	TGTCCTTCCTGGTTTGATCC	CTCACTCACTCACTCACTCACTCTC
AUBES4486	CTCGACCAATCGACACACAC	GGCATAAAGAGCACGCAAA
AUBES4489	CTGTGAGCAAGGACGGTGT	ACCAGGCCATACAGATCCAC
AUBES4490	GCGCAAGAGCATGTGTGATA	CATCCCATCTCAAGCCTCTG
AUBES4492	GCTTGATGATCCTCACAATGA	TTCACAAACGCACAGAATGC
AUBES4494	TGTGCCAGACTGCATTCATA	GCTATTCAGTGGTGCATGAGA
AUBES4495	GTAAGAGTGTGCCAGCCTGAG	ATGTCCGTTATCTGGGGTGT
AUBES4499	TGGAGTTTTCCCTTTTGTCC	GCATCTGGAACGAAGATGCT
AUBES4500	CTGTGTGAAAGGTATATGTTCTTGG	TCTGTGTTTGATGCGAATCTG
AUBES4503	ACCTTCAGCAAGCGGAATTA	GCCTGCTAGCCAAATAAACTG
AUBES4505	TTAACGAGGCGGCGATATTA	CCGCTTTGACGTATTGCAC
AUBES4508	CCATGCATTAGTTTCAGAATGTC	GCGCGCGAAAGACTATATCA
AUBES4509	GGACCATTTTAGGGGAAATTG	TGTATCTGTGCTTTTTGGTGGT
AUBES4510	TGTTATTTAAGCAACTGATTCAACG	CAGAAACGTGACCTCGCTCT
AUBES4511	TATGGAGGCCAACACACTCA	CTGTGACACTGAGACCCATCA
AUBES4513	GAAGCGGAGTGGGATCAGTA	ACGAGGTAGGAATGGCACAG
AUBES4514	ATGGGGAATGCTCCACATAA	TCGATACCACGCTCTACACC
AUBES4515	AGTCTCCAGTGCCAGTGCTT	ACCAGCCCACCTTTTTCTCT
AUBES4518	CCCCTCAGTCTTCCCTCTTC	CTGAGACACCACCTCCTGCT
AUBES4519	CTTGGCAGCCAGCTATAAGTC	AGCTGACGCACTTTTTCCAT
AUBES4521	GGTTTGCATTGGCTTAGCAT	GGACCACAAGAACGTGGAGT
AUBES4522	TCACACTCACGGGAGAAAGC	CCCCTCCTTTCCACTTGTCT
AUBES4523	TGGGATTCGTGATTTCCAGT	CGCACCTGTACATGCTTTTC
AUBES4524	CCCCCACATTCATACATAAATAA	GCGCACACATATAGAGGGAGA
AUBES4531	GGTGCCAATATTAATGGAGGA	GGAGCCAGAAGAAAAGTGGA
AUBES4532	GTGAACAGACGGCAGGAACT	GCTCATTAGTGCCTTTGTGTTG
AUBES4533	CCCATGTGGACATGAGGAG	TAAACAGCGTTCACCCTCTG
AUBES4535	CGCCACAAGAAATAACCATGA	ACAGCTGACACTGCATAGCAA
AUBES4537	GATGCGTGCAGGTCATTTC	ATGCATGGTCGGAGATCAG
AUBES4538	GCGTTGTCGATATGGTGATG	TGTTCTGGCCGATCAGTGTA
AUBES4539	AAAGCTGCCAACACCAAAAC	TTGCACGCCATTTGAGAGTA
AUBES4542	CCCTCTCTCAAGATCGAACC	TCCTAGAACTGAGCCCAATCA
AUBES4544	ACATTTGAACCGTGCGTGT	TCCAGATGGTTCGTGGGTAT
AUBES4545	TGAAATAACCAATTCAATCCATTT	CGGTTAGGCTTAAGGGTGAG
AUBES4547	TTTGCTCTCCAAATCATGTGAC	CCAGACATGAGCATCACACA
AUBES4549	CATGGGGGTGAACTTTCAGT	AACCTGCAGGATTCAGGAGT
AUBES4551	ACACTACCGCTTACCCGAAA	TGCAACCTTTATGCTCCTCA
AUBES4552	GACTAAAGGGTGAAGTTTGGAGTC	CACCTGAGTGTCCGATGATT
AUBES4553	CGATGGTAAAGGCAACTGGT	ACCGTTCTCAAGAGTGGGTCT
AUBES4554	GTCCTCCAAACCCCTGAAGT	TGCGCTATCATTCTGTGTCC
AUBES4555	TTTGCTCTCCAAATCATGTGAC	CCAGACATGAGCATCACACA
AUBES4556	CATGGGGGTGAACTTTCAGT	AACCTGCAGGATTCAGGAGT
AUBES4559	TGAATCCATGGAGCAACATC	TGTGATGGGGAAAAGTGGAT
AUBES4560	CGCTAAGTTCCTGCCTTTTG	CCTTACACCAACGGTCACAC
AUBES4561	GACTAAAGGGTGAAGTTTGGAGTC	CACCTGAGTGTCCGATGATT
AUBES4562	CGATGGTAAAGGCAACTGGT	ACCGTTCTCAAGAGTGGGTCT
AUBES4563	GCTGAAACGCTTTAGGTCCA	CGATTTGAGACGCATCTGTT
AUBES4564	TGGTTAGTGGTGGTGAAGCA	CAATTGGTGGACAAGATCAGG
AUBES4566	GGCTCAACTCTCCCACAAGA	CTCCATACCGTGTCCTGCTT
AUBES4568	CAGCGTTAATGACGCAAGAA	TCCAGTCCTCCGAGTCAAAC
AUBES4569	GTCCTCCAAACCCCTGAAGT	TGCGCTATCATTCTGTGTCC
AUBES4572	GCAAAGACTCCTGGGTAACG	TTGCAACTTGAAGCCTCCTT
AUBES4573	GGCTTGTGCAGTGTTGATTG	TGCAGTTCCTGACTGCTGAA
AUBES4576	ACCGAAGACCTCACTGGAGA	TTGTTTCCCATCTGGATGCT
AUBES4577	GCCTTTCTGAAATTGTACTGACC	CATGTTTCGCTGAGCGGTAT
AUBES4579	GTACTCGCGTCTGCGTCTCT	CGCCAACCTGATTAGAAACC
AUBES4584	TGCCGACTTTCCTCTTCAAA	AGCATGGAGGGGAGTGTTTA
AUBES4587	CAAAACTTCATGCCCCACAC	GAGGAAAATGCAGCCTGAAA
AUBES4588	TTCCAAAAGAAGCAAAGTGC	CCAACCTCAATCCAGACCAC
AUBES4589	GCATGAAGGTGTGATTGACAGT	GAAGACAAAACAGCCCCACT
AUBES4590	TAGGGAGTCCAGTGCCAGAG	CATTAAATGTAGCTAGAAATGGGTAAA
AUBES4592	ACAGACGAAAAAGGTGGGTTT	CCAATTTATTTGTTTGTTCATGG
AUBES4594	TGCTGCAGACATGCTGACTAT	GGTGTCCCAGAACGAAACTG
AUBES4595	CCCCCAAACGTAGAACTCTG	TGAGCATGAATTTAGGAGTGC
AUBES4596	TGAATCCCAAACTAGTCGCTTT	GCACAATGTCATCAGGAACG
AUBES4597	CTGCTAAGCTGCCTCACTCA	TTGAATACCAGAGCTCAGAGG
AUBES4598	AGGCTAAATTTGACCCAACAA	CCTTTAAGGACCATTGTAACTGA
AUBES4599	TCTGTGGGAGGGTGAAGAAT	CCTTGACAGTTTTGCCAGGT
AUBES4600	AGTGGCGTCCAATAGTCTGAG	CATGAGGAAAAACTGACCTTTTG
AUBES4601	CCCTTGGTTGACCTTCCTTT	GAGAGAGCGAGCGAGAGAGA
AUBES4602	TTGCAGAAACCTTGAACATCC	CGTGCGTCCTTATCATTTTG
AUBES4606	TACCTGCTTCTCCAGGGAAC	AAGTGTGCCAACGGTTTTTC
AUBES4607	GGTGCCTGGCTCTACAAGAT	GTACGGCCCTTAACCCTCTC
AUBES4609	TGCTTGCATCCCAGTCTCTA	AAAGGGTGATCAGGAGAAGGA
AUBES4611	AGCTCAAGCAGAGCACCTG	GTCAGGAGGGATGGCTCTTC
AUBES4613	CAATGAGTTGTGGAGGCTTG	TGTGAACAATGTGTGAAACCTG
AUBES4614	CTTCGCCTGTAATCGGACAT	ACAGCACAAACTCCGTCTCG
AUBES4617	GGTAGGGTGGCAAGACAGAA	ACAACCCCAAAGTACGATGC
AUBES4625	TAAATAGCCGAGGTCCGTTG	GGACGATGACAGGGTGAGTC
AUBES4626	ATCCTAGCCTGCCTGTTCTG	GATCTCGAGGCAGTCAGAGG
AUBES4631	CATGCAAATCCTCAAAATGTG	TGTGCCAGTAATTCTGGAGTTG
AUBES4635	CATTAGAACAGGGGGTGACG	GCAAAGCCATGTGTTTCTGA
AUBES4640	CCTGAGGAGAGCAGCAAAGT	ATTCTGGCGTCGTGAAACAC
AUBES4645	GGCACTGAGCATGCATTAAC	TTGCATCTGTCTCCACCTTG
AUBES4647	TGATGAAGAGAGGTGGGTGA	AGCACACACATATCCAACCAA
AUBES4648	TGCACGTGTGCCGTATACAT	ATCAGAACTCGACCCCAGAG
AUBES4649	GGCATACTATTGTGCCCTGAG	TGTTGATTGTCCAACTGTGC
AUBES4651	GATCTCTGACCCGACTGCTC	CGTGTCATGTTGTATTTATCACTCG
AUBES4652	TCAAACCAGGGTCCGTAAAG	GACCCAGAGCCTTGACAACT
AUBES4653	GATGGATGGCGTTATGGATG	GAATGAAAGGGAAAGGGAGAA
AUBES4669	CGGGATCTATCCACGTATGG	CGGGAATTTCGGAAAAAGTC
AUBES4671	CAGGACTTTAGGGCCCTTTC	TCTACCGCCTGAACAAATGA
AUBES4673	TCAAATGATTCTCAACACAACAGA	TGCCAATTCTGACACAGTGG
AUBES4675	CATTTTGGGTGCCACATACA	TCAGGAACGCAGAAATGAAAC
AUBES4678	GGAAGGAGTCTCCAGTGTCG	TAAAACGTGGAGGTGTGCTG
AUBES4680	GTGTACCCATCCCTCCCACT	CCCCCTTTTGCAAGATGTC
AUBES4684	TGTACCCATCCCTCCCACT	CCCCCTTTTGCAAGATGTC
AUBES4687	CATTTCGATGGAAAAGGATCA	CAGCCAGTGTGGTTGTAAATG
AUBES4692	ACAGCAACAGTTGGAATTGG	TGGGCAATTTAGTGTCAAAGAA
AUBES4693	AGCACGGAGAGGTGACAAAC	TGATCTGTCCCTAGAGTTTAGAAGG
AUBES4701	GGGCCATTCTTACACCATTG	CATTTCCAGAATCCCAGATTG
AUBES4703	TTAGGCCGGGTGTAACTGAT	AATCAACCGTTTTGCTCTGG
AUBES4706	GCTTTTGTACCTGCCGATTG	AACAATGCTACGTGCTGTGC
AUBES4710	TCCTGTCTGTTTTGCAGCAT	CATCAAGATGCGAACCACTG
AUBES4712	CGAGTGAGAGAGGTGTAGAGAGAG	TACCCCGGTCACATTCTACC
AUBES4715	CGAAGCTGATCCACTCCTTC	CCCTGAATGCAGACAAAGGT
AUBES4716	GCACCAAGCTTGAAAATTGC	GCACTGGACAGTGATGTGGT
AUBES4717	GCAGCCAGAAGGACAGACTT	AAACAAGATGGCGGAATGTG
AUBES4721	CAATTTATTGGCACCCCCTA	TCAACAACCTTTTGCTGCAC
AUBES4722	GAGGAGAGGTCGTGACTTGG	GTACTGGCCAACCGGGTTAT
AUBES4725	GCTTGGTAATAGTCAGCGTGTG	CAACTCGCCTTTTGCTCTTC
AUBES4727	TTCAATTAATCAGCGCCAAG	CCGTGACCCTCAAAAGGATA
AUBES4730	AAGCATCTCCGAGCATGTG	GCAGGAGGCTGTTTCAGTGT
AUBES4731	CACGGCTAACTTTGCTGTCA	CAGCGCTGTGGTGTAACTATC
AUBES4732	ACACATACATCGGGCAGGTC	CCATATCCTGCAGCTGTGAC
AUBES4734	TGCTTGCCAATTGTATGAGTG	AACTTTCAAGCACCGTTGTGT
AUBES4737	GGAGTTTTCCAACAGCCAGT	GGAAGTGTGTGACAATCTAATAAACAT
AUBES4745	GACCGAGGTCTCTCTTTTGC	GCCTCAACAATTTGGTGTGAA
AUBES4751	ATGTGGGTGGAGAAACATCC	CTCACATCTGACCCCGAAAC
AUBES4752	GGAAAATCTGTGGCGGTTTA	CCTCCCGTAACCTAGGAACC
AUBES4755	GGCGTTTAAAGGAAAGCAGA	TCACACCCTGCTCATTTCAG
AUBES4757	CCCAAAACAACACAGGATTG	TGTGTTGCTTGTGTTGCTTG
AUBES4760	TCAGTGGGGAGGATAAGCTG	TCACAGCCTTCTTTGCTCAG
AUBES4765	AATTACGCACGCACAGATTG	GGCAGCCTCCTCTAAGGGTA
AUBES4766	CAACACTTAAGAGCTCTAGATTTCCA	CCCTTGAGCGGTCTAGATTT
AUBES4768	AAATGGCACTTAGATGGAGCA	TTGGGATAAATTCGCACCTT
AUBES4770	TTTCTCGGCTTGTGGTTTCT	GCCTGTTATTGGTGGCATGT
AUBES4771	CACGTTAATGATTTCTGGTTGG	TCTTCCCTTCCTCTCCCCTA
AUBES4772	TGAATGGGTGTGTGAGTGTG	CACTGAGATTGGACGGATCAT
AUBES4773	CAGTGGGCTCAGATGAAAGC	CCTTGTGAATCAGAGCGACA
AUBES4777	TCTTTTGAACCAGTACGAGCAA	CTTTGCACCAGGGGTCAT
AUBES4780	CATTCCATCACCAGCCTCTC	AGTGCTCCGTACCACCAGAG
AUBES4785	TTCATGTGTGTGTATGAGGAAGAG	GGATTAGGCGGACATTGACA
AUBES4786	GTTGCGAGAGCGAGAGAGAG	AGCACACCATGAACGCTACA
AUBES4792	ACTCGTCGTGTGAGCTGGAC	TGAGCTTTAGATTAAACCCATTCAG
AUBES4795	GCCTTGTGGGTTTTAATTGC	AGCCCCCAGATTACACCAC
AUBES4796	TCATGCTTCACATCCACACA	GTCTGTCTGTCTCTCTCTTTCTCTC
AUBES4798	CTTCGGAGCCTTATTGTTGC	TGGCTCTTGGGCTACTCTTC
AUBES4801	GAAGGAGTCTCCGGTGTCAG	TCTTTCGCTCTCCCTCTCTC
AUBES4809	AGGCATCTTTGCTCTTCAGC	GCAGTAGGGCACCTCTGATT
AUBES4810	TGTTGACACGTCCCATTCTT	ACGGCAGAACTGTCGGTATC
AUBES4812	TTCCAGATGCCCCTTGTTAC	CTTCCTGGGATAGGCTCCAG
AUBES4814	GCTTGAAAGCCCTATGAGGA	TTCGTTTAAAGACAGCCCATT
AUBES4816	TTGCCAGGGTTAACCTTTTT	CAGGTTCTCTATACCATCACAAGC
AUBES4817	GGAGCAACAACAACAGCAAC	GGTGGCGCTTTCTGATTTTA
AUBES4819	GGAGTTGTCGTTTACGAGTGC	TGTCAAGAATCGAGGGTATGTTC
AUBES4821	TCGTCATTCTAGCCACTGCT	CGTTCTGTGAATCAGGCTCA
AUBES4822	TCGTCATTCTAGCCACTGCT	CGTTCTGTGAATCAGGCTCA
AUBES4831	CCTTGCGGATGTCCAATAGT	AAGAGACAGGGAGTGGGAGAG
AUBES4832	TTGGGGCAGTATGGAAAATG	TTTTGGATTGTGTTGCAGTCA
AUBES4833	GTACTGCGGCACATTTCATC	GAATCGATGCGTTCAAGGAT
AUBES4834	GGTTTCGGTGATGATCTTCTG	CTATGGCCCAGGTAAAGTGTG
AUBES4841	GTGTACAGCCGAGGTGAGGT	GGAGTCTCCAGTGTCAGTGCT
AUBES4846	ATGTGGCGTTATGGCTCTCT	CGGCAAGCACCACTCATATT
AUBES4847	AAACCGTCATGGTCATTTGC	TTCAATTCGGATGGATGACT
AUBES4849	TCTCACGCTCTTAAGCCAAA	TTGTATGGCAGACAGTCCACA
AUBES4852	ACCTGCAGTTTTTGGCTTTT	AACAGAGTCCCGCTGTCATC
AUBES4855	TCGCTATTGCAAGTTGGACA	GCGCAGCCTTTTAATCAATC
AUBES4862	TACAGCGCTTTGAGAAGCTG	GCCATGGCATTTTATTTATTGAC
AUBES4867	CATGTTTGCACGGAACAAAA	CGCTGCCTATTTCCACTGAT
AUBES4870	AATCAGAGGCGCAAATCAAC	TGCTGTTCGGACAAAAGCTA
AUBES4873	ATGACATGGAACATGCCAAA	TGTGAGGGGTGTACTCACTTTT
AUBES4874	ATTGGCATGTCAACATCCTG	GGTGTGACTTTCGTCCGTTC
AUBES4878	TCATCATTTCCAATTCAGTGC	TTGACATGTTTTCATTTCAAGG
AUBES4879	GACCGTCTCTTGCAGTGTTG	ATGCAAGTAGATGGCTGCAA
AUBES4880	TGTGGACACCTGACCTTCAA	CAGGTCGCTCAAGTTTTTCC
AUBES4882	CGGATCTGCTTCTCCACAA	GCCTGTAGCCCACTAGCATC
AUBES4886	TCTTGAGATGGGAGCAGGAT	GCCGTTTAAGTTTCCCAAAA
AUBES4889	TGCTGGATGTTTCAACAGTGA	GTTGAAGCAACAACACTTCAGG
AUBES4893	GGTTGGCCAATGAAAACAAC	GAGTGGTTTGCATCTTGTGG
AUBES4895	AGTGTCTCGCGCTGACTTTT	CGACTTTACGACGACGACCT
AUBES4898	TGTCCGGAAGCGTTTTATTC	TGGTAACGTGGGGTAGCTGT
AUBES4899	GCCACATCATCACAGCCATA	GAGTGACTCGGAATTGTGCAT
AUBES4902	CAAACCTTTTGTGTTTGCATTT	AACTTAGGTGTGAAATTCCCATT
AUBES4903	GAAATACGTCGCCCTCTGTG	GGATCCATCTTCAAGCCTCA
AUBES4908	CAAGCTGGGGTATGTGAAGAA	GCAGGGAGGATGAAATGAAG
AUBES4911	CAGTCGTTGATCATCCAGGT	GTTTACATACCCCTTGCAGAATC
AUBES4915	CATCACCAAGAACAGGCAAG	GGAGGCTCCACCTTTACACA
AUBES4916	TCCAAAGAACCCTTCACCAA	TTGTGTTTGTGTCTATGCACCT
AUBES4920	GACATTTCCGCCATTTTCTG	TGGATTCCAGTGGTCCATAA
AUBES4922	GCACAATTTCACCCCTCAGA	GCCACCATCTTTGCTTCAA
AUBES4925	GGCACCGCAAACTACATACA	CTTGGAGAACGGCAGAGAAC
AUBES4927	AGTGTTGTCTCTCGCCATGA	CGACCAGGCTGTGAGTGTAA
AUBES4932	ACACACCGCTGTCTCTTGTG	AACCTGAGGTCTCTGATGTGC
AUBES4935	CCCGTACCAGGATAAAGTGG	TCCAACGCACGTCAAAAGT
AUBES4937	CAGCATTACGCAAAACTATTTACA	GGACAACCCGCTCAAATACA
AUBES4940	TTGTTGTGGGACATCCACTT	CATGTTTGCAAGCACTGGAG
AUBES4941	TGGACAAATAGTTTTGGGTTTG	GGAACAGAGAGCTTATTGTGCT
AUBES4945	GGCACCTTAGACCTTCCGTA	CAAATGGTGTGCACCTGAAA
AUBES4952	GTAACTAAAGCCCCTCCAAGC	TGCATGTTCCATACCTGTCC
AUBES4953	CAGCCTGCATTGATAGTGGA	CATGGTACTGGTCTCTGGTCTC
AUBES4955	CAATGTTGGAGACGGTTCTG	TGCAAAGCTGCCAGTAACTC
AUBES4957	TCTTTCTCGCAGGCAGTTCT	GCATCTGTGGCTTTCACAAC
AUBES4958	GCAGCAGTAGTATTATTGTGGTGA	CTTGGATCATCTTGCTGTGAA
AUBES4959	TGGTTACACAGGCAAGAGATG	TTAGTGGAGGGCACTGTGTG
AUBES4960	CAATCATTGGCAATTTGCTG	GTACATGTTGGCACGGAACA
AUBES4961	GTTGGGATTTGTGATTTCCAG	GAGCACTGCAGACCAACTGA
AUBES4962	CAGACCCCGATGAAGAGGT	CAGTACATGCATCCTCAGTAGTCA
AUBES4964	CCGTATTGATTCGATTATGCAA	CTACGCAGCTCTCGGGTTTC
AUBES4967	TGTGCAGTTTTATGGGGAAA	TGCATCAGTACAAAAGAACAGACTT
AUBES4968	TCAAAATGTCATCTCATTACCTCAA	GGAATTCCCAAAGATGAACTG
AUBES4975	TGTAGTTGATTGGGGGTTTATG	CGGTGTGTCATGTGATTGGT
AUBES4977	GGGTCTGAATTGCTCTCAGC	TCACGAATCGCGAACTAACTC
AUBES4978	GGAAGTCTGCGTTCAAATCC	CACAGAGCATCAACATCATGG
AUBES4979	TGCAGGCAAATGCTAAGCTA	CATCAGCTTGCCCTGAATAA
AUBES4980	CATGCGGATATAAATGGAAGC	CTTGCTGTCCAGATGCTGTC
AUBES4981	GTGCACCAGCTTGTTCTTCA	CGCTAACTGAAACACGTTCG
AUBES4985	AAGGAGTCTCCAGTGTCAGCA	CTTCCCTCACCAGCCTCTC
AUBES4987	CCTTTCGCAAGAAGTTTGGT	CTGATTGGTCAGCTGCTTCA
AUBES4988	GCAAAGTGTCATTTCCTCAGTG	AGAAAACTAAATGCAAAGAAATAAGAA
AUBES4994	CGGTACCTTTCATTCACCTTG	CTCTGGCAATGTGGGAGTCT
AUBES4999	GATCAGGCCGAAAAGTTGTG	AAGGGCTGAAACCCTTTTGT
AUBES5002	TTATGCCGCAGCTGAAGTTA	TTAGCTGGACACCTGCCAAT
AUBES5005	GCACTAATATTGTTCCCTTGCAT	TTAGAGCCTGCCGTGTAGTG
AUBES5014	CGCATGTTCCATGTTTTGTT	CCACCACTGAAATCACCATTTA
AUBES5017	CCTTGTCCATGTCTCCTTCC	GGCAATCAGCAGGAATTGTC
AUBES5020	GACGTCCACCGACAGTACAT	GGAATGCTGGACATGAGGAA
AUBES5023	GCAGGGAAGCTGCATTAAAA	AGAGAAGGCCTGGCACATT
AUBES5026	CGCACGCACAGAAATTCATA	GCGATCTACCTGCACTTCCT
AUBES5028	CGGGCAAATGAAGCAATTTA	GAAGGACAGCTCTGGAATGC
AUBES5032	CGTCACTGCACCTTGACAAC	CCCATGAAGAGGCAATGTGT
AUBES5042	TCTGTTTATGCATGTTTGGAAT	TGGAAGGAGTCTCCAGTTTCA
AUBES5045	TGACTCCTGCTGATCTGTGC	CACTGTACCGAGTGGCTCCT
AUBES5049	GGCTTGGTAACGCAGAGAAA	CCCAAGATGCAACACTCACTT
AUBES5051	TACCGTAGCCTTCCTTGTCG	GCCGTCGTAGGAACATCTCA
AUBES5059	CGCATGTTCCATGTTTTGTT	GAAATTGGATTCAAGGCACA
AUBES5062	GCTCCTATGCCCCCTTTTTA	CGGCAGGAAAATCCACTTTA
AUBES5064	TGTCACAGCAACCTGAACAGA	CAGTGTGTATATAGCTACCAGATTAGC
AUBES5066	GGAAGGAGTCTCCAGTGTCAA	TAGTCCCCTCATCAGCCTGT
AUBES5068	CCGTCTCCACCACTGTTACAT	TGTCATCTCTGGCTCGCTTA
AUBES5070	GGTGCATTTGTTCATCGAAA	GCATTATGCAGCCAGACAAT
AUBES5071	CGATGTGCACGATTTACCAT	CTTGAGTCCGAAGCTGATCC
AUBES5072	GACTCTTCCCCACCTCCAAG	CCACTTGCAAGCAGTATAACCA
AUBES5073	TGTGCAAATTCCAATTCCAG	CTGTTCAAGTCTCCCCATCA
AUBES5074	GCAGGCAGACAAATCCAAAT	GCACTGCGGTCTACAAACAT
AUBES5075	GTGTCCTCCGCATACCAAAG	GTAAGCACACACCGCTCCTT
AUBES5077	GTGCGAGGTTCTGTTCGATT	TGCATGCATATCCTCGTAAA
AUBES5079	TTTACCCCCTTTTCTGTACCC	GGCCTCAGAGTGTAGGTGGA
AUBES5081	AGCTCAAGGTTGGATTTTGG	CACAGGACAATTTTGCTTTGTTT
AUBES5092	TGTTGTCCATGAATCTCATTCT	GCAGGGTGTGTTATAGTAAGTTATTGA
AUBES5113	GATTCTTCCGAACCTGATGG	AATAGCATCGGTTGCACTCC
AUBES5121	GCAGCGTGAGGGGTTTATTA	GCAACTCCTCCTTCCGCTAT
AUBES5122	GCTTTGGCTCATGACTTGAA	CGCACTGAATTTGAAATCACC
AUBES5123	TTCCAAAGTTGGCTCACAAA	CAGTCCGGGCTTTTTCTTTT
AUBES5125	TCGTTTGTGCTGCTTCAGTT	ATGCGCAGTGTGGGTTAAG
AUBES5126	CGGAAATATGCCCCTATTCA	AGGAGGCTGGCAAACACTT
AUBES5127	TACCTGCAACCTGGAATGG	TGTGCCACAAGATTTTTCCA
AUBES5128	CTGGATGTGTTGTGGACCAA	CAGGGTGTCCCAAAAGTCTC
AUBES5131	ACAAGCAGTCATCCAGAGTCC	GCTCTGATCAGCTCTGTCACC
AUBES5132	TTGTGCTGCTTCAGTTCTGG	GGTTGAGTCATCTGGCTTCG
AUBES5133	AGTGGTAGCTTGGCAGTGCT	TCAACAGAGAGAGCCTAGTTTATGA
AUBES5137	CATGCACATCAGCGAAAACT	ATCGCGATCGACATATTGG
AUBES5138	ATGACCCACAGTCCCATCAT	TCCAGCTTGTGATCCTACCA
AUBES5139	GTGTACGAGCTGAGGAGTGCT	AAAGCGGTTTACTGTACTTCCAA
AUBES5140	CATTTGGTGTCTGGCATTTC	CCATCCGAATTGGTCAGAAT
AUBES5142	ACACACTGACGCTCCATTCA	AAGCTTTGTTCCGCTCTTCA
AUBES5143	GATGCTGCATGTGTTTCTCA	TCATGGAAAAGGAGGACTGG
AUBES5147	ACAACAAATGGTGTGCATGG	ACTGATTCTGGCATGGCATT
AUBES5152	CAGACTTCAGCAGCTGGACA	CATTCGGTCTCTGGAGGAAC
AUBES5153	TGCCTCAACAGCATATTTCC	TGGGAGCTTCGATAAACGAT
AUBES5157	CCCATGGGGAAATTTGGTA	GCTTCCTGCCGTACACTCTC
AUBES5158	CACATCTCCAGGGTTGAGGT	ATCACAGGGCACATTCACAC
AUBES5161	GAAACCTGAGCCGTGGATTA	GGCTTCGCTGTTGTTCCTTA
AUBES5162	GCTTCCCACGGAGATTTACA	CATCGGACATTGATGCCATA
AUBES5163	CGTGCGGATGAAGATAAACA	GAACTGTGCACTGGAAGGTGT
AUBES5164	TATAAAACACTGACCCACTGAATC	CGTGATGAATGAACCCAATG
AUBES5167	TGCGCATTTTGGAGATTTTA	TGTAACAGCGCAACCAGACT
AUBES5170	TGTATTTGCCCCGATTTCTT	CACATGAGTGATCGGTGTTG
AUBES5171	GGCAACCCATAAGTCTATCATCA	GCTTCATTCCTCATTTTCCTTG
AUBES5172	ACCTCAGGTATGGGCAGACA	TAGGGAGCCTCCATGTTGTT
AUBES5173	TAATGCTGAATGCACGGATG	GTAGGCTTCTCGCTCAGCAC
AUBES5180	TATTACGGAGCCGCTAAAGG	GCCCTTTACGAGACGTGAAC
AUBES5181	ACACTCCCCAGTGCTGATTT	GTTGTGTGAACCCGTGTGAG
AUBES5182	GTGAGGAGCCTGGAGCCTAT	AGTTCGCATGTTCTCCGTGT
AUBES5185	GGAAAGGGGTGACAGATTGA	GAATGGCTTGGGTGTGTACC
AUBES5187	TCCAAGTGCTGTTCCTCACA	ACAGGCATTGCTTCCTGTCT
AUBES5189	CGCGCAAGTCACAATCTATC	ACTACCTTCAGCTCCGCAGT
AUBES5190	CCGTGATTGACATCCTGTGA	CAATGATTTCAGGCTAACGATG
AUBES5195	TCAGACACCGTTGCATCTTT	AAAATGTTCTGGGTTGACAAA
AUBES5201	TGGTGTTTGGTGGCTATTCA	ATGTTTGTGCGCTGTTTTTG
AUBES5204	CTCTCTCGCACACATACGTCA	ACAAATGCCGGATCTTCTGT
AUBES5208	GTGTACGAGCTGAGGAGTGC	GCGGTTTACTGTACTTCCGACT
AUBES5212	GAGCGAGAGCTGATTGCTTT	TCCTGTGACAGCAGCTCGTA
AUBES5214	CTGCAGCAGTCAACACTCAA	CAATTCAACGAGCATGACCA
AUBES5216	GTCTTTGCTTGCCACCTCTC	GCATGGTTAATTGGCTGACC
AUBES5217	TTCCGTGAACACCTAACCAA	GCAAAGCGACATATCAAGCA
AUBES5219	GGCAACTTTGTGGTTATGAGC	GCCTATAGAGACGATGACTGTGAA
AUBES5220	CAGGGGCAAACAGTTCATCT	CCGCCGACGTATATTAACAA
AUBES5226	TGCTCTACAGCTCTGCGAGT	CAGGCGAATGCTAGGAACA
AUBES5228	CTCTGAATGCATTGGCTGAA	CCACGTTACGCCACTTAACA
AUBES5236	TGCAACATGTTTCCCATGTA	CAACGCAAATCGTTTCTTGG
AUBES5237	GGCTGTTGTGCTGTATGCAA	TGCATGAAGGTGTCACTGGT
AUBES5246	GATGTACGGGAATCGCTTGT	AAGGCCCATTTCAGAGAAGA
AUBES5247	GTGGCCAATCTAGGATGGAG	CCAACTATTTTCACCGAAAGG
AUBES5249	CACTGGTGCATCTTCAGAGTGT	AATACCCAGTGCACAGATTGC
AUBES5256	CTGCTTTAGCCTCAGCCTGT	GCCTTTCAAGAGCATGTTGG
AUBES5261	AAGCACTGAAGCCTTGTGGT	GTACCTGCCGACAACTGGAC
AUBES5262	CTGGAAACAGGCAGAAGGTC	TCGAGAACGGACACTTTCAA
AUBES5263	TTCATGTCGTTCATGATGTTCA	TGTGGTGCAGCAAATAAGAG
AUBES5270	AGGGTGTCTTTGCCTCCATA	CGCAGGTACGGATTCCACT
AUBES5272	GGCCGTGCAACTGATTTAAG	ACCCTGGATGTGCAAGGTAG
AUBES5274	AGGAACTGGGAGCGGATAAT	AGCTGCTAGCGGTTTAGACG
AUBES5276	CAGGGTTACAGATTCACCCAAC	TGACTAAAGCTTGTAACTAGGGAAA
AUBES5279	GAAGCACGCAGACCAGTACA	GCGAAACCATTTTCCTTCCT
AUBES5280	TGCTCTGATGACCCACTTTT	GCAGGTGGAGGTAGTTTTGG
AUBES5282	GGGATGACTGGGATGTCCT	TACAACCCCTAGCGTGTTCC
AUBES5289	GGCAACCATAAGGCACAAAT	GTTTGAATTGTCAGCCCAAAA
AUBES5292	CATTCTGGGGTCACTCGAAC	TGGCAGAACGACATTTAGCTT
AUBES5293	GAGACCGTCTTGGACGTTTG	TGAACAGAACCAGCTCATGG
AUBES5298	GTGCGTGCGTTCTGTACAAT	CTCGTATTCCACAATACAGTGTCA
AUBES5299	GGCGGGCAAGTAGACATAAC	GACGAGAATCTTCACCATCTGA
AUBES5303	CATTCTGGGGTCACTCGAAC	GGACGTCGCTGAAAGACATT
AUBES5308	GTTTTGGGTGTCGGGAGAT	TTCTAGCTGTGGCTCTGGTG
AUBES5312	CCTTAGGAGTGGCCAAATCA	GCGTACCTCCTGGAGAGTGT
AUBES5313	TGGAAGAGAAGAAACCTGCAA	GGCTGTCAGGTCACTGAGGT
AUBES5315	CTGGAGGGCCTCAACAATTT	CCTCCCAAATGGCATTAACA
AUBES5318	GTTCCTACCCCCACTCCACT	GCAAAGCAAGGGATATCAGC
AUBES5321	ATCCGTGACATGAAATGCAG	CATGTGAATCACTTCACTGGAAA
AUBES5335	TCTTTTACACATGTAGTATTGTTTTGG	GGGCGTAGCTTGGTAGACAA
AUBES5337	TTCTACATAGGAAATGCACAAGC	AGATGCCAGACGAACAGACA
AUBES5340	CACAGCCGCCAGTATATGAGT	CTCGTCATTAGGCACCTGCT
AUBES5341	TGTTCAGCTGGTAATTTTCATTTC	TCCAGTCAGCAGGACATCAC
AUBES5348	GCTGAACGTTCCTCCTGTTC	TTGAGCCCCTCAAAATGAGT
AUBES5349	CGGACATGGGGACGTCTAAT	CAGCGTGCATTTTAGTGGTG
AUBES5351	GATGAGTGAATGCTGGCACA	CCTTGTGAACTGAGCAGACG
AUBES5352	TGTTCCCATGACAGTGATGAT	TGCCCTGTCATTTTCTCTCC
AUBES5355	GGTTACAAAGGCCAACCTGA	AGATTGCCATGTGTGGTTTT
AUBES5356	TGTCCTGATAAAGGGACGTTTC	AGCATTGGCTCATCTCATCA
AUBES5364	GCTGTTGAGCTTTTGAGCTTT	GGGATTGTTGTGTGGCTATG
AUBES5367	TCCTTCCATGAACGATGTTG	CCAGTGCAGTGGTGTTCTGA
AUBES5376	GGGTCTGCTATGCTGAGAGG	ATTTCCGCTCCTCCCTAAAC
AUBES5378	GCAAAGGCCTTACAGCAAAG	TGGTGGGGGAATATGAAGTT
AUBES5385	CCGGTTTACTGTACTTCCTAATTC	GGCGGGCAAGTAGACATAAC
AUBES5396	TCTCTTAATCTCCTCCCTCACC	TCCCTGGTAATGAACAGTTGC
AUBES5398	TGATGCGTTATATCGAGTGC	AAAGCACCAGTGCCAGCTAT
AUBES5400	CAGCTCAGTACCGTTCAAGC	TCCACACGTTCCGATAACTG
AUBES5402	CCTCCTCTGGCTGATACTGG	GGGTGTGTGTGCATTTAGGA
AUBES5407	GCCGCATACTGTACACCACA	CACCGCTGTACACGACTCTG
AUBES5418	GGAGGTGGGTGGAGAGTTTA	TGTGCTACGGAAGCTGTGTC
AUEST0005	TCAGATGTGCCTCTGTCAGG	CTGATGTGACACGGCTTCTG
AUEST0006	GGGCAGCCGAAGAAAATAG	TGCCTTGAGTCAGTGAGACG
AUEST0007	CATGACACACCAAGCTGCTC	TGCCTAAGCCTGAGCCATAC
AUEST0008	GCGTTTGTGTGCGTAAACTG	GTAGCGCTCAATGTGTGCAG
AUEST0009	ACAGCCAATTCCACTGCCAC	GTCGTTCAATTCATGTCAACAGC
AUEST0011	TAGGCTCCGGGTTCCCCGTG	GTCAGGACTTTGACTTGGCA
AUEST0012	GCACTTTTAATGTAGTCCCAGTAGG	CACACCAGGGCGGTGGTCTC
AUEST0013	GAGAGACGGTGGCATGTTGC	CCGGGTGGACGGTCTTCAGACG
AUEST0014	ACACCACGAACCGATCACAC	TGGTTCCATGGCGATCGAGC
AUEST0015	ACATCTGGAGAACCACGGTAAG	ACCCCGAACAACCTCGGCAC
AUEST0016	TGGAGCGAGTCACCATGCTG	GGAGAGATCCCATAACCTGTGTG
AUEST0018	AGGTGTGATGTTGGCCCTAG	AGTAACTTCAGGAGTAGACGCTG
AUEST0019	AGCTCAGTAATCCTGGGCAG	AGCTCGTGCTTGCATCAGTG
AUEST0020	TGTTCCTATTTGCCTGCACAGCTTCC	CTTGAAAGAAGGCAATAGGATAAGG
AUEST0021	TGCGCAGAAACCCAGGAGGT	TTCCCTCCATCACTGTTGGT
AUEST0024	AGGTTTTGCTATCAAAGAGGCA	ACATAGGGCTGGGTGATACG
AUEST0025	GGCAGACAATAAAATGCACAGC	CACACATGACATTTAGGATCCTCC
AUEST0026	AGGCCATGAATGGCTTCCAG	AACCTGTGCTGTCAGCTGTG
AUEST0028	CCAACACCACAACTGCCAGC	AGGGGTTTTCAGTGGTTCC
AUEST0029	GGAGATACCACCGGAGACAC	TTTGTAAGCCACTCACATCC
AUEST0030	GTTTTACAGCTTTGCACAATGG	ACTAGACAGCCACCTACAGC
AUEST0031	TGGATGTCGCCACCTGAAGC	CCTGACTCCTGCTCAGATCG
AUEST0033	GTGGAGTGTGTGCGGTTTGT	AGTCCAAGCTGCACGGCTCG
AUEST0035	TGCTTCTGGGAGCTCGACAC	ACCAGTCGTCTAGCGTAACTG
AUEST0036	GGCGGACGCGTGGGTCTGAT	CCCCTCAGTTATGGAGCAGTC
AUEST0037	GCACCTGGTTTGCTGATGCTG	TTGGTGCGAATGGAGCCTCG
AUEST0038	TCAAGTGCTGTGCTTGATGC	CATTTTAAGCACAATCACAGGGAC
AUEST0039	AGAACTGATATTCAGCGCCCGC	ACACAGCGTAGACCTCATGC
AUEST0040	TATTCAGCGCCCGCCAACAC	ACGCGCGTAAGCCATCGGTC
AUEST0041	TCTGAACGGCTCGGCTGCTG	AGGCCATGACCAGGCTTTCC
AUEST0042	CCAGTGATTACTTTCAGTGCTTCCA	CTCTCACTAGTTTTGGCGATCC
AUEST0044	AACTGATATTCAGCGCCCGC	CACAGCGTTAGACCTCATGC
AUEST0045	TGGATGCATGGTGACCCTCG	AGTACACAACAAATCAGAGCAGT
AUEST0046	CGTTGCTGTCGGGCACACAC	ACAGTAGCTGGGCATGATCC
AUEST0047	ACACGTCAATAAACGTGTTGCTG	CAGGACATTAATCAGGCCTGC
AUEST0048	TCCCCCAGACTCCACAGGAG	CACAACCGATGAGCTCACTC
AUEST0049	AGCGCACAGTGGGACGATCC	ACACACTGGAATAATGTGTGGTG
AUEST0050	CAAGTTCCTACGCTCCATCC	ACAGCATGATTACACTCAGAACG
AUEST0053	CTTCTTGTGCCGGAGCACAC	AGCACCTCGAAGTCTTGCTG
AUEST0055	TGGTATACAGAGATCTCAGCCAC	GCAGTCACGCTCCAAGGAGG
AUEST0056	TCAAAGCCACAGCATTCAGC	TGTTCAGGGAGTGCTGTGTG
AUEST0057	TCCTCACATCTAAGAGGAGCTTC	AGTTCGGCCGAGCTTCCGAG
AUEST0058	ACATGAAGCTCCAGCAACTG	AACTGGATGACAGGCGGACC
AUEST0061	GATTTGTTGTCATCGTGACC	GTACCTGCGTAACGCGGATCTG
AUEST0062	AGAACAGCTGTAACCTACCTGG	TTTACCGTGCGCAGAACGAC
AUEST0063	ACCCGACACCATCGAGGTGC	TTATTATTTCTAAATGTTTG
AUEST0065	GAATACAGTCACATCATCACACGTC	TCATGCACTCGACCATGTGG
AUEST0068	ACTTACGGAGGGTCTGACAG	AACAAGACGCTTCCCAAAGC
AUEST0069	CCTGTACGTGGCCTACAGTG	CGCTAACACTACAAACAGCAGC
AUEST0071	TCATCTCCAACTCCCACTCTTC	TCGGTGGGACGCGCTTACAC
AUEST0072	CGCGCTAGAGACTACCGCAG	AGGAGCCTCTGGTCAGTGTC
AUEST0073	CCAGTATGGTAACACCTACAGCAC	TGAAGCGCTTAGCATCCCAC
AUEST0075	CAGCGTTACTTATTTCTCTCGC	AACTGCGTGCCGTGCCGCTC
AUEST0076	ATCAGGACGAGCCCATCAGG	TTTGGCCATGCTACGGCAGG
AUEST0077	GTGGATGCTTCCCATGTTCC	TGTACCTGATATTTACACTG
AUEST0078	TTCCTCACATTACTGTTGCATCG	AGATGCGACCGAACGCCGTC
AUEST0079	TTCCCAGACTCAGGTGATGCGGCCTG	CCTTTCCAGCCGCTTCCAGG
AUEST0080	AGATTCTAAGCCCTCACACCCAACAG	CAGCGAAGCCCACCTGCACAG
AUEST0081	AGTAAGAGCCGACTGGACCA	CGTCAGCAGAGACGTGTGTG
AUEST0082	TGCTCCGGTGTGACACGAGC	TCCGTGCAGCCGGTAGCTCC
AUEST0083	CTGGACGCTAATGCTGATGG	TTCAAACTTTAATTTGCCTCATTC
AUEST0084	AGCATCTCCGTGGAGAACGGTTGCTC	TGTGTAGGACTTCATGGACCTC
AUEST0085	GATGAGCTCGTATTCTGGTCACT	ACACATTTGTAAAGCCCCAA
AUEST0087	GTTGTTTGATTCAGTATTGCCCA	AAATTATGACATGGTTCCTTGTCC
AUEST0088	TGGTCGACTCAGTCAACGAC	TCAATCTCCTGATCGGTGTAGTC
AUEST0089	TTCTGTTGGGTTACGGCCAC	CGCCTTGTAACACCAAGTCG
AUEST0090	AAGACGAGACCCAGAAGGGA	AGGGAATGTCATCGTATCCCAGGGCG
AUEST0091	CCTGTTTCAGAGCCAGTCTG	TGACTGAGTAGGACGGTTGC
AUEST0092	TGACCAACTCCACTGCAGAG	GTCCATGTCTTCGAGAGCTTG
AUEST0093	AACACGCAGACGGGCAAGAG	GAACAGTGTGAGGAATCCAGC
AUEST0094	TGCAGATGTGCGACAAGTCG	GGATCTCTGAAGGTGATGCAC
AUEST0095	AGAAGCTCGGCACGATGCTG	ACTCGAGTCACCGGTGTGTG
AUEST0096	TGGGATAGGCTCCAGGTTCG	TCCAGACTTCAGGCAGTCAC
AUEST0097	TCTCACGGTCCCGCTGCAGG	TCACCGTGAGCTCGCGACTG
AUEST0098	GCGTTCATCAATCCAAGACGTG	GATTGGGGTTAGAGGCGTTGG
AUEST0099	TCCAGTGCATTGGTACAGTCCGTTGG	CCTCCTGAGACCACAGCAACG
AUEST0101	TCAGCTACGACACGCTGCTG	TGGAGGGCACGGCCACTCTG
AUEST0102	TGGGATTGAGCCGTCATCAG	TGTGTGGTCTCCGCTTGAGG
AUEST0103	TGTGCTATCCACGCCAAGCGTGTCAC	ACACACGGAGAATCGGAGCAC
AUEST0104	AGCTTAGAGGACGAGTAGCTG	ACAACACCACACGACTTTGC
AUEST0105	CACTGTTTCTCATTTCAGCA	ACATCAGCTTGTAAGTCGGT
AUEST0107	TCTGGACAGCATGAGCGCTG	ACCCATTTATTAAACACACA
AUEST0108	AAATCTGGCGTTCAGGTGGA	CGGGGAAATAAATAAAGTCTGGAGT
AUEST0109	TGTGTTGTAACACACACTGACG	TGGTGGGCCAGGTCAGGTCG
AUEST0110	ACTTCGCCAGGACCTGGTTC	AGGCTTGGAATTTGGGTGTG
AUEST0111	ACATGGAGTCCAAGCTGCTC	AGATGTTGGCTCCAGTGGTG
AUEST0112	AAGTAGAAGGAGATGCAGGTGTCTCC	CTTCCAGTAGAACACTCACAGGA
AUEST0113	CGCAATACAGGGAGCTTACC	AGTCCTTGCCTGCCTTGTGC
AUEST0114	TCATGACACGTCAGGAGCAC	TACACCAGCAGAGGTTGACC
AUEST0115	AAGCTCACATCATGATGTCTGC	ACATTCCTTCATAGAACCGT
AUEST0116	GCACACACAGTCCCTACAGG	TGACGGACTCCGGCTCAGTG
AUEST0117	GCAGCAAACCGTCCGCAGAC	TGACCTGCAGTGAACAGCAC
AUEST0118	ACGTGGATGTGTCTCGTCTG	CTTTCACAGTGTTACAGGAGGAT
AUEST0119	AGCTGAGGGTGTGTCCGACC	TCCCACAAGGTTGCAGCAGG
AUEST0120	ACGTTCTCGAGTGCGATCAG	TGCTCTTTACTCTGGAGCGA
AUEST0121	GGAACCTGCCGGTCTCATGC	TCGTGCACGAGGTGGCCAGC
AUEST0122	AACACCCACGCGCACACACC	ATGGAAAGCAGGGTAGGTGG
AUEST0123	ACTGCTTACCTCCGGAAGAT	ACGGTCCACACACAGACTCG
AUEST0124	GGATGTGACACTCAACCCGAGAG	GGGGCATTTACAGCATCGAGCC
AUEST0125	GGTTGGAATCATATGTTCAGTGC	TACGGGTGCTAAGGTGCTGG
AUEST0127	ATTTGCATGCACAGACACGT	TCCTCCGCTTTACCCCAGTG
AUEST0128	TTCTCCACGGCCCAGAATGC	AAAAAAGCACAGCGCCATCT
AUEST0129	GCTAAATAAATCATTAATATCTGTCCTG	TGAAGGACTCGCCTGTTCTC
AUEST0130	AGTAGCCATTTTATCCTGTCAC	CGGATGAAGAGGTCAGTGTG
AUEST0131	CATAGAGCAGGCAGGCTTCC	GTAAAGCCTGTTGAGCGCAC
AUEST0133	CCCTGTTGCTGCCTCTGCC	GCTTTCTCCTCTATGACACTGC
AUEST0134	TCGACCCACGCGTCCGGAGA	AGTGCAGACTTGCCGACACC
AUEST0135	TGAGAACATCTTGGCTGTGGA	ACAGACAGACTCACTTGGGT
AUEST0136	ACTGCTCTGAGGTCTTCAGG	ATCTCAATGTCCGCTCTGGA
AUEST0139	CCATGGCGATTACACAGCAC	TGCAGCAGCTCCGACTTCAG
AUEST0140	GGACATCCTGATCCAGTACGAC	TCCTCAGGTTTATTCTGGTG
AUEST0141	TGCAGCATTGACTCGTTGAC	TGTGCCAAACGAACGCACTG
AUEST0142	GATCCCATGTTCCCCAACGA	TCAGAGTCCGCCTCGGCAGG
AUEST0143	AAGTACCGCAGTGCCATAGG	ATCATCGGCCCACAACCACG
AUEST0144	TCCTGAGCCAGCCGCATGTG	TCATGTCTTTGATGTTGTGTGT
AUEST0145	CCCCAGTGAACGCTCCACAG	AATCGGGAGTCTCGGGCTCG
AUEST0146	GTGAAGACCACTGGCACGAG	ACAGAGACTCCGACGAACAC
AUEST0147	TGTGGTTTCGGGTTGCAACA	TGATTACAATGGGTCATGGCAC
AUEST0148	AGAGGACCAGACACAGCTCTG	AGTTCCTGATGCACAGGCACG
AUEST0150	CAGTGACCCGGTTCAGGCTC	GCCGGTAGACTACCTAGCACT
AUEST0153	GAGCATTAACCTTTTCGCTAGACTG	CCACATCTGTAAGGCTTCAGG
AUEST0154	CTTCTTTCATGATCGGTCAGAGG	AGAGGTCTGAGGGTTAGTGG
AUEST0155	AGCACTGAGGCCTGGGTTCG	TCAGAAGAGTTCAAGCCATTTGC
AUEST0156	ACCACATCCGCCCAGGGGAC	CACCTACCAGATCGCAAAACC
AUEST0157	AGGAGTGATGATACCACTGGAC	TCGTCCGTTGGCCGTAGAGC
AUEST0158	TCGCCGAGGCTGCGATGAGC	TCGTCATGAGGTCGCGCACC
AUEST0159	TGCTGAGAGGACCGTCATGC	GTCATTATACCGAGTTATGTGTGTGAG
AUEST0160	AGCAATGGGTGAAGAGGCCGCAGTCG	AATGTGGTGCATGTTGCAGC
AUEST0161	TGTTCCTGAGGGTGACCTGG	TGAAGGCCAGAGCTTTGGTG
AUEST0162	ATGCTGTCGGCGCTGTTTGG	CAGATAATTCTGTATGAAGG
AUEST0163	GGTTTCAGGTGCCGTTCCAG	GATGGTCCAAGCGACATACC
AUEST0164	CGATGCGTCTTCACAGCGAG	ATAGCAGAACAGGTACATGG
AUEST0165	TCTCTGGTTCAGGAGTGGCTTGTCAC	CCCTTCTACCTTCTGCCAAATGC
AUEST0166	ACCTCGCAACTCAGCCAAGG	GGGTCGAGGGATGGTTGACG
AUEST0167	TCAAGGCAATTCTGCAACAGTC	TGGTGCGGTACGTTCAGCTC
AUEST0168	ACCACGTGCCCAGGACACAC	ACACTCATGTCCGGCTTAACA
AUEST0169	TGAAATCTCCACTGATGGAGCA	TGCTCATATTTACCAAGGGTGC
AUEST0170	TGCTCTGAGTCACCAGTGTG	TCGACCGCTAGCAACAACAC
AUEST0171	CGTGATGACTCCGGGTCCTG	CCATGAGAGTAAATTTGATC
AUEST0173	TGGAATGATGTGTTGTAGCAGTG	ATGCTGGAAAGTGTTGCGTG
AUEST0174	TGGAAGTTATTTACACACCGCTG	ACTTACTCCAGAGGACGAACTC
AUEST0175	TCAGAGACACGCAGATGTGC	CACCAACACAGACAATGCCT
AUEST0176	ACTTTACTCTCACTGGGGACTG	TGTTGAACTGTTAAAACTGCTCTG
AUEST0177	TCCTCACCGACATGTGGGAC	AGTACAGTGGATTGCAGGGTT
AUEST0178	GCACCAGTTCTTTTGGTGTGC	AGATGCTGACACGGCAATCC
AUEST0179	TGTTTCATGTAGGCCCGCAT	TGGGAGACAGCCAGGGAAGC
AUEST0180	ACGGTTCTAATGGTTGGTTGC	CGTAGCTTTGCAGCGTCTGG
AUEST0181	GCCAAAATTAAACCTAGGATGGAGC	ACCATTTGTGTGTGTGACCTG
AUEST0182	GTAGGCGAGTGGGGAATGAG	AATGTCTGCGATTTCGCGTG
AUEST0183	CGGTTTGGGAATTACACAACCTG	ACTATATTTCAATCGCGTGCTGG
AUEST0184	CTGAAGTAAAGCACCAGGACAC	TGCACCTCCTCCATCCCTCC
AUEST0185	GAAGGCCTCGTAGCGCCAAC	CGTTGTGCAGTTTAGAAACGAGC
AUEST0186	TGATATTAAACCCTTCAGACCCCTC	CAGAATCATTAAACCTGCTCCCTTC
AUEST0187	GGAAAGGAATCACGCAGTCAG	CGACAATAAGGACTTTGTTGTGACG
AUEST0188	TGCCTACTACACGTCACACTG	GCAGAAGTATCTCCTTACACGAGAGA
AUEST0189	ACACAAATTATTCCTATAGCCGTG	AGAACTCCTGCATGCAGTCC
AUEST0190	GGGAAGCATTTGGTGTGGTC	AGAACCCGTTGAGCGCTACC
AUEST0191	GCTGCACGCCGTGTACCGAG	TGGAGCGGTCCGCCATCGAC
AUEST0192	TGTGCTGAGTGTGTGAGGTG	ACGCGCGGAAATCTCCCACC
AUEST0193	TGTGGAACGCTCGTGACGAC	ACCTTGAACACGCCAATGAC
AUEST0194	TGCACTTTGTTTTCAAACCGT	AAGCTTTGAAAAGATTTCAT
AUEST0195	TGGACGCAGAAGCCAAGCTC	GCTCAGGGGTCGTGTCACTG
AUEST0196	AACAACCTTCATTCCAGTGACG	TGTGCCAATGCCAGTGACAG
AUEST0197	AGTTGTTGTATCTTTTGGGA	TCACGAGCATCTGCACGAGC
AUEST0198	GTGCTAAGGACATGCTTTGGAG	AGATACCTCTGACACAGCCTG
AUEST0199	AGCTTCAGCTTCAACAGCAC	ACCACACTCTCCCCGTATGG
AUEST0200	TGCATGTAACAGACGCTTCTG	TGCTGTGGAAGTGCCCGCTC
AUEST0201	ACTCATTTTGCACGCGGTCG	CGTCCTCTGATTTCAGCACC
AUEST0202	AACGTATCCGTGGACCGGAG	CCTGGCTCACGAGTCCGCAG
AUEST0203	AACAGCAGCAGCGAAACCAC	TGCCTCGTTGCCCAGCGGAG
AUEST0204	ACCGAAGACGAAAACCGACC	TGGCATGGTTGGAGCCCAGC
AUEST0205	CTATGGCGATACCTGGATGC	TCCAATAAGCAACCGTGTGTG
AUEST0206	AATCCAACCAGCCAGTCAGC	TGGACCGACCAATGGCACAC
AUEST0207	TGGACAGCTATGCCAAGTGC	TTACTCGCCAGCGATGCAGC
AUEST0208	GCGGCCAGAACACATCCGAG	TGACCTGCGAGAAGCACCAC
AUEST0209	GTGTCCTGATCCAACACGAG	TAACACTGACGTGAGCGTCC
AUEST0210	CTTTCCTCCGCTAAGGCTGG	GTCTACGGTTCACCGTGAAG
AUEST0211	TGATACAGTAGGTGTGGTCTCAG	GCACATCAAGGCACGGCCTG
AUEST0212	AGTAGGACCCTGGCTCCTGG	ATCCTTGCCAGCAGAGTGAG
AUEST0213	ACTCGGTCATCGTGGTGCTG	CACTGAGAGCAAGCCACCAG
AUEST0214	ACTGGCTCGCACCAAACCTG	TCCTTGAGGAGCAGACACTG
AUEST0215	TGCGGCTGTGTGTGTGCGTG	ACCCACCGTCTCCCTCCACC
AUEST0216	TCCACACGTTCGAGGTGACC	AGTTGGTGGTGCTGTTGCTG
AUEST0217	AGAATGCTAACGGCTGGCAG	TGACCCTGTAACGCTGTAGG
AUEST0218	GCTCCAGCAATGCCACATCG	CATATCTGCACCATCCGTGAG
AUEST0219	GCTCTAGTGTCTCTGATGCAGTG	GTGTCTTGGGAGGCTGTTGC
AUEST0221	TGCATGTAATGGGCTCATCAC	TCAGGGAAATACCTCTGGAGG
AUEST0222	GCGCGTGCAGATGCAGCGTC	GGGGTTCCTCAGTGTTCAGC
AUEST0223	TCCGCAAATCACTCGGGCT	TCACATCTGTCCATCAGTCA
AUEST0224	TACTAAGACGAGGCACGGAG	CCGTGGTACATCGCTAACTGT
AUEST0225	GCCTAGTTCTGGCCTCAGAC	AGCAAAACACGCACGCACAC
AUEST0226	GCCGCATCACCGCTGGATGG	TCGTAGTCACGCGAACACTG
AUEST0227	GCACAAATCTCAAGGAAGCACAG	CAAGGCACTGGGAGACGGTG
AUEST0228	CCTTCAGTGACAGAGTCCACG	TCAGGTCACAGAGGTGTGTG
AUEST0229	GAAAGTCACTGCGGTTGCTG	AGAACTGGTGGGCTCGCCAT
AUEST0230	TCCCTCCTCACTGACTGGAC	TGAACCTCACGGCTCAAACC
AUEST0231	TGGGGTTCTCCAGCTACGAG	TGACTTCCTCCAGCAGCGTG
AUEST0232	AGAAACGGAAACTGTAGCGTG	ACACTTCCCGCTCTCCTTGC
AUEST0233	AGCAACCTCTGGGCTGGCTC	TGATGGAGCAGTAGACCGTG
AUEST0234	ACCAAGGAGGTGAGGGTTCC	AGCGAACACCACGCATGTTC
AUEST0235	GGTCACACTCTACGGCACAC	GAGTAAAACTAGTGGCTTTC
AUEST0236	GTTCGAGGCGGCCATGTTGG	GGCTGATGTGCGAGCCTTCG
AUEST0237	TCAGAGCTGTGCAACACTCG	TCAGTCGCGCCCTCATCG
AUEST0238	CTCACTGAGATACACACTGTACTG	TGAGAGAGGTGAGAGTGCTG
AUEST0239	AATGGGACAAAATCGATGGGAG	TGCATCTTGCTCAGGTGACG
AUEST0240	GTACTCCATCAACACGCAGCAG	AGATGGACTGACGGATCGCTG
AUEST0241	TCATTACCCACATTCAGACGTCCTG	CACATTCGCTGCCCTTGGTG
AUEST0243	GAGTTTTCCCAGTCACGACCCTAATCTGTCCTAAATCCCAGGTAC	ACCACAGCAACAGCTGGAGC
AUEST0244	GAGTTTTCCCAGTCACGACCTCATACGAGCTTGATGTGAGC	TGGAGAAGTGCACTGTGAGG
AUEST0245	GAGTTTTCCCAGTCACGACTCAAGGGCCAGTTCCACGAG	TGTGGAAAAAAACCTATGCTGC
AUEST0246	GAGTTTTCCCAGTCACGACACACGCACACAGGACCTCAG	GGCCGAGTGAAGGCTCCTGG
AUEST0247	GAGTTTTCCCAGTCACGACGAAAAGGTTTCAGTGGACCTAGC	TCAAGGCCTTTGTGCAAGAG
AUEST0248	GAGTTTTCCCAGTCACGACGCGGAGCTAAACGTCCGCAG	TGGTATCGTTCTAATAGAGGCACC
AUEST0249	GGCGTCTCAGGTGGCCATCG	GTTAAGGGCCTCGCTCAAGG
AUEST0250	GAGTTTTCCCAGTCACGACATTCAGAAATCGCCGGTCAC	CAGACACTGAACACCGAGTC
AUEST0251	GAGTTTTCCCAGTCACGACTGAGTATTGCTTTCCGACTGTGA	TTGATATGCATACGCACTGGTG
AUEST0252	GAGTTTTCCCAGTCACGACACACACCCTTTTAACAGTGTGC	TCCCTGTGTGTGTGTGGTGG
AUEST0253	GAGTTTTCCCAGTCACGACTCCTGAGGAGGTGTTACGCA	CGTCACAGAACTGCAGCGGA
AUEST0254	GAGTTTTCCCAGTCACGACATTAGAACCGGTAGGGTAGACG	TTTGGCAGGAAACCGGACAC
AUEST0255	GAGTTTTCCCAGTCACGACAGTACGAGCGAACCGGCGTC	AGAGAGCATCAGAGTCCCAG
AUEST0256	GAGTTTTCCCAGTCACGACCAACCTTGGAGAAGCCATCTG	AAGCCCGCCTTCAATGCACC
AUEST0257	GAGTTTTCCCAGTCACGACCTACACCAGCGTGCACACAG	CCTTTGCGATCAACCAGTCG
AUEST0258	GAGTTTTCCCAGTCACGACTGCTGGACTGTGTGCTGGAG	TGTATTTGCGACTTGGTGTGTG
AUEST0259	GAGTTTTCCCAGTCACGACGGAGTGTGACCGAGTAGCTG	GGGATGTTGTCTCCCTCAGAG
AUEST0260	GAGTTTTCCCAGTCACGACGAGAACCTCAATCCAACGTGTC	GGAAACCAGTCCATCACAGG
AUEST0261	GAGTTTTCCCAGTCACGACTGGAATGTTCCCGGGACAAC	TGAAGCTCTGCTTCCCGGAG
AUEST0262	GAGTTTTCCCAGTCACGACACTAGTACATTCTGACTCGCTCG	ATCCTCCAGATACTGAGGCTC
AUEST0263	GAGTTTTCCCAGTCACGACATCAGTGTATTCGCGTGTGTG	AGGCGTCTCTGAGCCTGGTC
AUEST0264	GAGTTTTCCCAGTCACGACGGCATTGCAAAACCACCAGG	ACAGTGTCAAACAGAGCTGTG
AUEST0265	GAGTTTTCCCAGTCACGACGGTGATCTCTTCACCAGACTGTC	TGGCTTGAAAGGTAGTCCCT
AUEST0267	GAGTTTTCCCAGTCACGACAGAAACACCGCCCAACACAC	CCTATTATCGCTATTGGGATGACCTG
AUEST0268	GAGTTTTCCCAGTCACGACTCAGGTAGGAGGCGTGGCTC	GTGAAAAGTATAAATAGCAG
AUEST0269	GAGTTTTCCCAGTCACGACAGTGAAACGCTTGTGCATCG	TGTCACGATCTGCAGACCTC
AUEST0270	GAGTTTTCCCAGTCACGACAGGACGCATTCTGCCATCGA	TGCAATGAAAACCCAGGAGTC
AUEST0271	GAGTTTTCCCAGTCACGACACAGATAGTGTATATATCGTGCACTT	TGCCTCGACAGCCAGCGGAC
AUEST0272	GAGTTTTCCCAGTCACGACCAGTACTATGTACACTCCTGATG	AAACACACGCACGCACACAC
AUEST0273	GAGTTTTCCCAGTCACGACTGATGTCAGGTTTTGCAGTGTG	CACTCCAACAGGTAGCGCAC
AUEST0274	TGGGGTCTTTTATCAGGCTTTG	CAAAAAGCAAACTGGAGTGTGG
AUEST0276	GAGTTTTCCCAGTCACGACTCTTCCACGATTCGAGCGAG	ACGGATTTGTTCAAGACGAGC
AUEST0278	GAGTTTTCCCAGTCACGACTGCGGACAAGCCAGGGTGTG	AACATCTCCCGTCGATGTCG
AUEST0279	GAGTTTTCCCAGTCACGACCATCTTCAGTACGGACTGCTG	TTGCAGCAATGCCATGCACG
AUEST0280	GAGTTTTCCCAGTCACGACGGAGACACTGGCCGATCTGC	GCCTCTGGTCTGGAGTCAGC
AUEST0281	GAGTTTTCCCAGTCACGACGCTAACCCCTTTTGCAGGATG	CCAGACCAGTGGCAGTTGTG
AUEST0282	GAGTTTTCCCAGTCACGACGATCATGTGCTACGGCATCG	CAGGGTATTGAGTGTGCAGTG
AUEST0283	GAGTTTTCCCAGTCACGACACTCTCAGTAGTGCTCAGTGTG	AGTGTCCCAGAGCTTCCACG
AUEST0284	GAGTTTTCCCAGTCACGACTCCAAACCTCCGGGAACCAC	GGAAACATGGCCATGGAAGG
AUEST0285	GAGTTTTCCCAGTCACGACATTTATCTAAGAAATACAAAACCCT	CCGTGATGCGTCGCTTCAGG
AUEST0287	GAGTTTTCCCAGTCACGACGGCTTCCTGCAGGCCGACAC	GGAGGCATGGCCTGCATGTG
AUEST0289	GAGTTTTCCCAGTCACGACGGTTTATTGTTTGTATTGAC	AGCCATTCACACGGATCCTC
AUEST0291	GAGTTTTCCCAGTCACGACCGTACTAAACTATTTTCTATGTGGTGTT	ACGACCAGTTCGGCGTCAGG
AUEST0292	GAGTTTTCCCAGTCACGACCGTAGAACAACAGGCCAAGG	CCATAGTGGGAGTCTGGACC
[truncated: 683 more rows]
